# Supplementary material for: Transcriptome Comparison Reveals Distinct Selection Patterns in Domesticated and Wild Agave Species, the Important CAM Plants
Source: Int J Genomics. 2018 Nov 22;2018:5716518. doi: 10.1155/2018/5716518 (PMC6282153; doi:10.1155/2018/5716518)
Supplement: Supplementary 1 — Table S1: the results of classification, Ka/Ks analysis, and functional annotation for the 6130 unigenes. [file 5716518.f1.xlsx]

## Sheet: Sheet1
A. deserti	Classification	A. sisalana	Ka/Ks	Ka	Ks	P value	A. tequilana	Ka/Ks	Ka	Ks	P value	Nr-ID	Nr-Score	Nr-Evalue	Nr-annotation	Nt-annotation	Swissprot-annotation	Nt-ID	Nt-Score	Nt-Evalue	Nt-annotation	Swissprot-ID	Swissprot-Score	Swissprot-Evalue	Swissprot-annotation	GO-BiologicalProcess	GO-MolecularFunction	Go-CellularComponent
gi|532817878|gb|GAHT01003046.1|	Unclassified	CL17550.Contig2_All	1.0335	0.0268	0.0259	0	gi|533098482|gb|GAHU01010484.1|	0.7498	0.0818	0.1091	0	gi|224122312|ref|XP_002330592.1|	350.1	5e-95	predicted protein [Populus trichocarpa] >gi|222872150|gb|EEF09281.1| predicted protein [Populus trichocarpa]	Zea mays full-length cDNA clone ZM_BFc0109G11 mRNA, complete cds	--	gi|194703131|gb|BT040645.1|	184	2e-43	Zea mays full-length cDNA clone ZM_BFc0109G11 mRNA, complete cds	--	--	--	--	-	GO:0003723//RNA binding	-
gi|532807357|gb|GAHT01012364.1|	Transcription Factor	CL1032.Contig2_All	0.544	0.2191	0.4028	0	gi|533094820|gb|GAHU01014146.1|	0.9396	0.1334	0.142	0	gi|224145414|ref|XP_002325634.1|	184.1	4e-45	AP2/ERF domain-containing transcription factor [Populus trichocarpa] >gi|222862509|gb|EEF00016.1| AP2/ERF domain-containing transcription factor [Populus trichocarpa]	PREDICTED: Brachypodium distachyon ethylene-responsive transcription factor CRF4-like (LOC100845176), mRNA	Pathogenesis-related genes transcriptional activator PTI6 OS=Solanum lycopersicum GN=PTI6 PE=2 SV=1	gi|357129494|ref|XM_003566349.1|	73.8	4e-10	PREDICTED: Brachypodium distachyon ethylene-responsive transcription factor CRF4-like (LOC100845176), mRNA	sp|O04682|PTI6_SOLLC	162	3e-40	Pathogenesis-related genes transcriptional activator PTI6 OS=Solanum lycopersicum GN=PTI6 PE=2 SV=1	GO:0044249//cellular biosynthetic process;GO:0042991//transcription factor import into nucleus;GO:0006139//nucleobase-containing compound metabolic process;GO:0048366//leaf development;GO:0048825//cotyledon development	GO:0005515//protein binding	-
gi|532779757|gb|GAHT01038510.1|	Primary Metabolism	CL2723.Contig1_All	0.4871	0.109	0.2238	0	gi|533085265|gb|GAHU01023701.1|	0.9111	0.1122	0.1232	0	gi|225453070|ref|XP_002269621.1|	444.1	2e-123	PREDICTED: methyltransferase-like protein 10 isoform 1 [Vitis vinifera] >gi|296087211|emb|CBI33585.3| unnamed protein product [Vitis vinifera]	Oryza sativa Japonica Group cDNA clone:J023091F21, full insert sequence	--	gi|32981498|dbj|AK071475.1|	109	7e-21	Oryza sativa Japonica Group cDNA clone:J023091F21, full insert sequence	--	--	--	--	-	GO:0016740//transferase activity	GO:0005829//cytosol;GO:0005634//nucleus
gi|532811543|gb|GAHT01009381.1|	Signal Transdcution	CL20102.Contig2_All	0.5517	0.1597	0.2895	0	gi|533086584|gb|GAHU01022382.1|	0.7979	0.1586	0.1988	0	gi|359491016|ref|XP_003634202.1|	891.3	0	PREDICTED: mitogen-activated protein kinase 9-like [Vitis vinifera] >gi|297734305|emb|CBI15552.3| unnamed protein product [Vitis vinifera]	Vitis vinifera clone SS0AFA21YF08	Mitogen-activated protein kinase 9 OS=Arabidopsis thaliana GN=MPK9 PE=2 SV=2	gi|349731210|emb|FQ394332.1|	807	0	Vitis vinifera clone SS0AFA21YF08	sp|Q9LV37|MPK9_ARATH	831	0	Mitogen-activated protein kinase 9 OS=Arabidopsis thaliana GN=MPK9 PE=2 SV=2	GO:0006468//protein phosphorylation;GO:0009738//abscisic acid mediated signaling pathway;GO:0000165//MAPK cascade	GO:0004707//MAP kinase activity;GO:0004713//protein tyrosine kinase activity;GO:0005524//ATP binding	GO:0005829//cytosol;GO:0005739//mitochondrion;GO:0005634//nucleus;GO:0005886//plasma membrane
gi|532794076|gb|GAHT01024191.1|	Protein Destination and Storage	Unigene31658_All	0.6958	0.0156	0.0224	0	gi|533077757|gb|GAHU01031209.1|	0.7582	0.0166	0.0219	0	gi|225449044|ref|XP_002274159.1|	1202.2	0	PREDICTED: endoplasmic reticulum metallopeptidase 1 [Vitis vinifera] >gi|296086015|emb|CBI31456.3| unnamed protein product [Vitis vinifera]	PREDICTED: Vitis vinifera endoplasmic reticulum metallopeptidase 1-like (LOC100266752), mRNA	--	gi|225449043|ref|XM_002274123.1|	214	4e-52	PREDICTED: Vitis vinifera endoplasmic reticulum metallopeptidase 1-like (LOC100266752), mRNA	--	--	--	--	-	-	GO:0016020//membrane;GO:0005783//endoplasmic reticulum
gi|532766706|gb|GAHT01051561.1|	Transcription	CL9364.Contig2_All	0.6113	0.0336	0.055	0	gi|533061012|gb|GAHU01047954.1|	0.7275	0.0536	0.0737	0	gi|359490984|ref|XP_002279968.2|	936.4	0	PREDICTED: poly(A) polymerase-like [Vitis vinifera]	PREDICTED: Vitis vinifera poly(A) polymerase-like (LOC100268087), mRNA	--	gi|359490983|ref|XM_002279932.2|	549	1e-153	PREDICTED: Vitis vinifera poly(A) polymerase-like (LOC100268087), mRNA	--	--	--	--	GO:0043631//RNA polyadenylation;GO:0006351//transcription, DNA-dependent;GO:0022402//cell cycle process	GO:0003723//RNA binding;GO:0005515//protein binding;GO:0004652//polynucleotide adenylyltransferase activity	GO:0005634//nucleus;GO:0005739//mitochondrion
gi|532752041|gb|GAHT01065329.1|	Unclassified	Unigene24908_All	0.8354	0.0867	0.1038	0	gi|533025147|gb|GAHU01072849.1|	0.706	0.0889	0.126	0	gi|224125100|ref|XP_002319500.1|	289.7	1e-77	predicted protein [Populus trichocarpa] >gi|222857876|gb|EEE95423.1| predicted protein [Populus trichocarpa]	PREDICTED: Vitis vinifera uncharacterized LOC100240883 (LOC100240883), mRNA	--	gi|359487501|ref|XM_002279262.2|	125	4e-26	PREDICTED: Vitis vinifera uncharacterized LOC100240883 (LOC100240883), mRNA	--	--	--	--	-	-	GO:0009570//chloroplast stroma
gi|532807540|gb|GAHT01012279.1|	Protein Destination and Storage	Unigene23353_All	0.694	0.0759	0.1094	0	gi|533096141|gb|GAHU01012825.1|	0.6306	0.0735	0.1165	0	gi|46389862|dbj|BAD15463.1|	568.9	7e-161	ranBPM-like [Oryza sativa Japonica Group]	PREDICTED: Vitis vinifera ran-binding protein 10-like (LOC100264951), mRNA	E3 ubiquitin-protein ligase RKP OS=Arabidopsis thaliana GN=RKP PE=2 SV=2	gi|359495209|ref|XM_002278685.2|	75.8	1e-10	PREDICTED: Vitis vinifera ran-binding protein 10-like (LOC100264951), mRNA	sp|Q9SIZ8|RKP_ARATH	49.3	6e-06	E3 ubiquitin-protein ligase RKP OS=Arabidopsis thaliana GN=RKP PE=2 SV=2	-	-	GO:0005634//nucleus
gi|532760414|gb|GAHT01057391.1|	Disease/defense	Unigene21055_All	0.6283	0.0812	0.1293	0	gi|533033829|gb|GAHU01068781.1|	0.6076	0.0619	0.1019	0	gi|357125440|ref|XP_003564402.1|	364.4	4e-99	PREDICTED: disease resistance RPP13-like protein 4-like [Brachypodium distachyon]	--	Disease resistance RPP13-like protein 4 OS=Arabidopsis thaliana GN=RPP13L4 PE=2 SV=2	--	--	--	--	sp|Q38834|R13L4_ARATH	164	2e-40	Disease resistance RPP13-like protein 4 OS=Arabidopsis thaliana GN=RPP13L4 PE=2 SV=2	-	-	-
gi|532799704|gb|GAHT01019898.1|	Primary Metabolism	CL4535.Contig3_All	0.7679	0.269	0.3504	0	gi|533076986|gb|GAHU01031980.1|	0.5862	0.2762	0.4712	0	gi|356559619|ref|XP_003548096.1|	610.5	2e-173	PREDICTED: probable S-acyltransferase At4g24630-like isoform 1 [Glycine max]	Zea mays full-length cDNA clone ZM_BFb0309M15 mRNA, complete cds	Probable S-acyltransferase At4g24630 OS=Arabidopsis thaliana GN=At4g24630 PE=1 SV=2	gi|194699243|gb|BT038701.1|	176	5e-41	Zea mays full-length cDNA clone ZM_BFb0309M15 mRNA, complete cds	sp|Q9SB58|ZDH19_ARATH	526	2e-149	Probable S-acyltransferase At4g24630 OS=Arabidopsis thaliana GN=At4g24630 PE=1 SV=2	GO:0055114//oxidation-reduction process	GO:0032440//2-alkenal reductase [NAD(P)] activity;GO:0008270//zinc ion binding;GO:0016740//transferase activity	GO:0005886//plasma membrane
gi|532758107|gb|GAHT01059265.1|	Unclassified	Unigene10480_All	0.5369	0.2732	0.5088	0	gi|533069128|gb|GAHU01039838.1|	0.5728	0.2765	0.4826	0	gi|357130295|ref|XP_003566785.1|	240.7	3e-62	PREDICTED: uncharacterized protein LOC100830007 [Brachypodium distachyon]	Oryza sativa Japonica Group Os01g0559200 (Os01g0559200) mRNA, complete cds	--	gi|115437623|ref|NM_001049876.1|	115	1e-22	Oryza sativa Japonica Group Os01g0559200 (Os01g0559200) mRNA, complete cds	--	--	--	--	-	-	-
gi|532783766|gb|GAHT01034501.1|	Protein Destination and Storage	CL12927.Contig3_All	0.343	0.0547	0.1594	0	gi|533083731|gb|GAHU01025235.1|	0.4696	0.0568	0.1209	0	gi|225458774|ref|XP_002283258.1|	842.8	0	PREDICTED: aspartic proteinase-like protein 2 [Vitis vinifera] >gi|302142232|emb|CBI19435.3| unnamed protein product [Vitis vinifera]	PREDICTED: Brachypodium distachyon aspartic proteinase-like protein 2-like (LOC100827449), mRNA	Aspartic proteinase-like protein 2 OS=Arabidopsis thaliana GN=At1g65240 PE=1 SV=2	gi|357122154|ref|XM_003562733.1|	303	4e-79	PREDICTED: Brachypodium distachyon aspartic proteinase-like protein 2-like (LOC100827449), mRNA	sp|Q9S9K4|ASPL2_ARATH	146	4e-35	Aspartic proteinase-like protein 2 OS=Arabidopsis thaliana GN=At1g65240 PE=1 SV=2	GO:0006508//proteolysis	GO:0004190//aspartic-type endopeptidase activity	-
gi|532765821|gb|GAHT01052446.1|	Cell Structure	CL9133.Contig2_All	0.4515	0.1259	0.2788	0	gi|533061504|gb|GAHU01047462.1|	0.4106	0.1073	0.2613	0	gi|218195670|gb|EEC78097.1|	479.6	6e-134	hypothetical protein OsI_17589 [Oryza sativa Indica Group]	PREDICTED: Vitis vinifera regulation of nuclear pre-mRNA domain-containing protein 2-like (LOC100257727), mRNA	Pollen-specific leucine-rich repeat extensin-like protein 4 OS=Arabidopsis thaliana GN=PEX4 PE=2 SV=1	gi|225438616|ref|XM_002276690.1|	77.8	3e-11	PREDICTED: Vitis vinifera regulation of nuclear pre-mRNA domain-containing protein 2-like (LOC100257727), mRNA	sp|O81765|PLRX4_ARATH	78.2	1e-14	Pollen-specific leucine-rich repeat extensin-like protein 4 OS=Arabidopsis thaliana GN=PEX4 PE=2 SV=1	-	-	-
gi|532800374|gb|GAHT01019228.1|	Cell growth/division	Unigene26854_All	0.3923	0.0095	0.0242	0	gi|533078722|gb|GAHU01030244.1|	0.3585	0.0101	0.0282	0	gi|225424087|ref|XP_002282940.1|	1230.7	0	PREDICTED: probable elongator complex protein 2-like [Vitis vinifera]	PREDICTED: Vitis vinifera probable elongator complex protein 2-like (LOC100257715), mRNA	Elongator complex protein 2 OS=Arabidopsis thaliana GN=ELP2 PE=1 SV=1	gi|359472924|ref|XM_002282904.2|	168	2e-38	PREDICTED: Vitis vinifera probable elongator complex protein 2-like (LOC100257715), mRNA	sp|F4I1S7|ELP2_ARATH	1096	0	Elongator complex protein 2 OS=Arabidopsis thaliana GN=ELP2 PE=1 SV=1	GO:0009560//embryo sac egg cell differentiation;GO:0006606//protein import into nucleus;GO:0000398//mRNA splicing, via spliceosome;GO:0009909//regulation of flower development;GO:0006261//DNA-dependent DNA replication;GO:0051604//protein maturation;GO:0010074//maintenance of meristem identity;GO:0006406//mRNA export from nucleus	GO:0000166//nucleotide binding	GO:0005634//nucleus
gi|532797827|gb|GAHT01021775.1|	Transcription	Unigene32191_All	0.4906	0.0626	0.1277	0	gi|533093686|gb|GAHU01015280.1|	0.0854	0.0039	0.0461	0	gi|297596866|ref|NP_001043149.2|	632.1	7e-180	Os01g0506200 [Oryza sativa Japonica Group] >gi|56201662|dbj|BAD73126.1| tetratricopeptide repeat domain 5-like protein [Oryza sativa Japonica Group] >gi|255673280|dbj|BAF05063.2| Os01g0506200 [Oryza sativa Japonica Group]	Oryza sativa Japonica Group Os01g0506200 (Os01g0506200) mRNA, complete cds	--	gi|115436837|ref|NM_001049684.1|	212	9e-52	Oryza sativa Japonica Group Os01g0506200 (Os01g0506200) mRNA, complete cds	--	--	--	--	-	-	GO:0009536//plastid
gi|532750343|gb|GAHT01067027.1|	Unclassified	Unigene31398_All	0.5463	0.0626	0.1146	0	gi|533079691|gb|GAHU01029275.1|	0	0	0.0145	0	gi|296081013|emb|CBI18517.3|	72.8	2e-89	unnamed protein product [Vitis vinifera]	--	--	--	--	--	--	--	--	--	--	-	-	-
gi|532766938|gb|GAHT01051329.1|	Disease/defense	CL8056.Contig2_All	0.597	0.0422	0.0708	2e-09	gi|533061684|gb|GAHU01047282.1|	0.7018	0.0456	0.0649	0	gi|218197549|gb|EEC79976.1|	382.1	1e-104	hypothetical protein OsI_21603 [Oryza sativa Indica Group]	Zea mays LOC100283527 (si687009g07(336)), mRNA >gi|195635336|gb|EU965019.1| Zea mays clone 283239 DNA repair protein XRCC1 mRNA, complete cds	--	gi|226504559|ref|NM_001156427.1|	127	3e-26	Zea mays LOC100283527 (si687009g07(336)), mRNA >gi|195635336|gb|EU965019.1| Zea mays clone 283239 DNA repair protein XRCC1 mRNA, complete cds	--	--	--	--	-	-	GO:0005622//intracellular
gi|532814715|gb|GAHT01006209.1|	Secondary metabolism	Unigene23285_All	0.311	0.0346	0.1113	3e-09	gi|533099893|gb|GAHU01009073.1|	0.3398	0.0808	0.2377	0	gi|84663857|gb|ABC60341.1|	303.1	4e-81	putative oxidoreductase [Musa acuminata AAA Group]	Musa acuminata putative oxidoreductase (Ox1) mRNA, partial cds	Gibberellin 20 oxidase 2 OS=Oryza sativa subsp. japonica GN=20ox2 PE=1 SV=1	gi|84663856|gb|DQ317316.1|	81.8	1e-12	Musa acuminata putative oxidoreductase (Ox1) mRNA, partial cds	sp|Q0JH50|GAOX2_ORYSJ	91.7	7e-19	Gibberellin 20 oxidase 2 OS=Oryza sativa subsp. japonica GN=20ox2 PE=1 SV=1	-	GO:0016706//oxidoreductase activity, acting on paired donors, with incorporation or reduction of molecular oxygen, 2-oxoglutarate as one donor, and incorporation of one atom each of oxygen into both donors	-
gi|532723130|gb|GAHT01093611.1|	Cell growth/division	Unigene67529_All	0.8135	0.0174	0.0213	1.27e-07	gi|532999695|gb|GAHU01085244.1|	0.4535	0.0015	0.0034	0	gi|255554168|ref|XP_002518124.1|	708.8	0	chromosome transmission fidelity factor, putative [Ricinus communis] >gi|223542720|gb|EEF44257.1| chromosome transmission fidelity factor, putative [Ricinus communis]	PREDICTED: Vitis vinifera chromosome transmission fidelity protein 18 homolog (LOC100244400), mRNA	--	gi|359495647|ref|XM_002265343.2|	256	6e-65	PREDICTED: Vitis vinifera chromosome transmission fidelity protein 18 homolog (LOC100244400), mRNA	--	--	--	--	GO:0006261//DNA-dependent DNA replication;GO:0007062//sister chromatid cohesion	GO:0016887//ATPase activity;GO:0005524//ATP binding	GO:0005657//replication fork;GO:0005634//nucleus
gi|532702047|gb|GAHT01114694.1|	Transposon	Unigene54267_All	0.847	0.5016	0.5922	1.95e-07	gi|532908541|gb|GAHU01133521.1|	0.9434	0.448	0.4749	0	gi|260446974|emb|CBG76256.1|	85.9	1e-16	OO_Ba0005L10-OO_Ba0081K17.7 [Oryza officinalis]	--	Retrovirus-related Pol polyprotein from transposon TNT 1-94 OS=Nicotiana tabacum PE=2 SV=1	--	--	--	--	sp|P10978|POLX_TOBAC	68.6	8e-13	Retrovirus-related Pol polyprotein from transposon TNT 1-94 OS=Nicotiana tabacum PE=2 SV=1	GO:0006310//DNA recombination	GO:0003677//DNA binding	-
gi|532795874|gb|GAHT01023129.1|	Unclassified	CL6004.Contig9_All	0.5366	0.0453	0.0844	2e-07	gi|533078444|gb|GAHU01030522.1|	0.5329	0.0293	0.055	0	gi|359481109|ref|XP_002267146.2|	445.7	8e-124	PREDICTED: uncharacterized protein At3g58460-like [Vitis vinifera] >gi|296089310|emb|CBI39082.3| unnamed protein product [Vitis vinifera]	PREDICTED: Vitis vinifera uncharacterized LOC100258103 (LOC100258103), mRNA	Uncharacterized protein At3g58460 OS=Arabidopsis thaliana GN=At3g58460 PE=1 SV=2	gi|359481108|ref|XM_002267110.2|	157	4e-35	PREDICTED: Vitis vinifera uncharacterized LOC100258103 (LOC100258103), mRNA	sp|Q8LB17|Y3846_ARATH	412	3e-115	Uncharacterized protein At3g58460 OS=Arabidopsis thaliana GN=At3g58460 PE=1 SV=2	-	GO:0004252//serine-type endopeptidase activity	GO:0016021//integral to membrane
gi|532786913|gb|GAHT01031354.1|	Transporter	CL3878.Contig2_All	0.3297	0.1343	0.4073	1.716e-06	gi|533066613|gb|GAHU01042353.1|	0.9235	0.0054	0.0059	0	gi|225455459|ref|XP_002274808.1|	628.2	9e-179	PREDICTED: multidrug and toxin extrusion protein 2-like [Vitis vinifera]	PREDICTED: Brachypodium distachyon MATE efflux family protein 9-like (LOC100822136), mRNA	MATE efflux family protein 5 OS=Arabidopsis thaliana GN=DTXL1 PE=2 SV=1	gi|357143121|ref|XM_003572763.1|	210	3e-51	PREDICTED: Brachypodium distachyon MATE efflux family protein 9-like (LOC100822136), mRNA	sp|Q9SIA4|MATE5_ARATH	246	3e-65	MATE efflux family protein 5 OS=Arabidopsis thaliana GN=DTXL1 PE=2 SV=1	GO:0006855//drug transmembrane transport	GO:0015297//antiporter activity;GO:0015238//drug transmembrane transporter activity	GO:0016020//membrane
gi|532789349|gb|GAHT01028918.1|	Unclassified	CL7383.Contig3_All	0.5648	0.0839	0.1485	2.471e-06	gi|533063417|gb|GAHU01045549.1|	0.5972	0.1711	0.2866	0	gi|226492036|ref|NP_001141797.1|	352.4	7e-96	uncharacterized protein LOC100273933 [Zea mays]	PREDICTED: Vitis vinifera IST1 homolog-like (LOC100261039), mRNA	--	gi|225423990|ref|XM_002282660.1|	168	8e-39	PREDICTED: Vitis vinifera IST1 homolog-like (LOC100261039), mRNA	--	--	--	--	GO:0048573//photoperiodism, flowering	-	GO:0009507//chloroplast
gi|532730550|gb|GAHT01086191.1|	Disease/defense	CL4604.Contig3_All	0.8225	0.0877	0.1066	5.614e-06	gi|532868447|gb|GAHU01152463.1|	0.7012	0.1615	0.2303	0	gi|255568974|ref|XP_002525457.1|	402.5	2e-110	leucine-rich repeat containing protein, putative [Ricinus communis] >gi|223535270|gb|EEF36947.1| leucine-rich repeat containing protein, putative [Ricinus communis]	Vitis vinifera contig VV78X268107.8, whole genome shotgun sequence	Disease resistance protein RGA2 OS=Solanum bulbocastanum GN=RGA2 PE=1 SV=1	gi|123650713|emb|AM425072.1|	63.9	1e-06	Vitis vinifera contig VV78X268107.8, whole genome shotgun sequence	sp|Q7XBQ9|RGA2_SOLBU	298	2e-80	Disease resistance protein RGA2 OS=Solanum bulbocastanum GN=RGA2 PE=1 SV=1	-	-	-
gi|532779217|gb|GAHT01039050.1|	Unclassified	CL14779.Contig2_All	0.2844	0.0149	0.0523	8.097e-06	gi|533060313|gb|GAHU01048653.1|	0	0	0.0194	0	gi|218194089|gb|EEC76516.1|	428.3	5e-119	hypothetical protein OsI_14296 [Oryza sativa Indica Group]	Phyllostachys edulis cDNA clone: bphyem117l24, full insert sequence	Pirin-like protein OS=Solanum lycopersicum PE=2 SV=1	gi|242383216|emb|FP097413.1|	190	1e-45	Phyllostachys edulis cDNA clone: bphyem117l24, full insert sequence	sp|Q9SEE4|PIRL_SOLLC	402	1e-112	Pirin-like protein OS=Solanum lycopersicum PE=2 SV=1	GO:0009737//response to abscisic acid stimulus	GO:0005516//calmodulin binding	GO:0005739//mitochondrion;GO:0005634//nucleus;GO:0009536//plastid;GO:0005886//plasma membrane
gi|532789562|gb|GAHT01028705.1|	Signal Transdcution	CL11169.Contig2_All	0.4619	0.0669	0.1449	1.1045e-05	gi|533071061|gb|GAHU01037905.1|	0.7759	0.0111	0.0143	0	gi|225432963|ref|XP_002284428.1|	718	0	PREDICTED: MATH domain-containing protein At5g43560-like [Vitis vinifera]	Oryza sativa (indica cultivar-group) clone OSE-1-96-C8 math domain containing protein mRNA, partial cds	MATH domain-containing protein At5g43560 OS=Arabidopsis thaliana GN=At5g43560 PE=1 SV=1	gi|149390624|gb|EF575742.1|	77.8	6e-11	Oryza sativa (indica cultivar-group) clone OSE-1-96-C8 math domain containing protein mRNA, partial cds	sp|Q8RY18|Y5436_ARATH	523	2e-148	MATH domain-containing protein At5g43560 OS=Arabidopsis thaliana GN=At5g43560 PE=1 SV=1	-	-	-
gi|532799685|gb|GAHT01019917.1|	Primary Metabolism	CL15855.Contig2_All	0.2775	0.0143	0.0516	1.1364e-05	gi|533075107|gb|GAHU01033859.1|	0.0652	0.0011	0.0166	0	gi|225431005|ref|XP_002279210.1|	508.4	1e-142	PREDICTED: CBS domain-containing protein CBSX6 [Vitis vinifera] >gi|297735292|emb|CBI17654.3| unnamed protein product [Vitis vinifera]	PREDICTED: Vitis vinifera CBS domain-containing protein CBSX6-like (LOC100266840), mRNA	CBS domain-containing protein CBSX6 OS=Arabidopsis thaliana GN=CBSX6 PE=1 SV=1	gi|359476788|ref|XM_002279174.2|	63.9	5e-07	PREDICTED: Vitis vinifera CBS domain-containing protein CBSX6-like (LOC100266840), mRNA	sp|Q8GZA4|CBSX6_ARATH	461	4e-130	CBS domain-containing protein CBSX6 OS=Arabidopsis thaliana GN=CBSX6 PE=1 SV=1	-	-	GO:0005773//vacuole
gi|532736200|gb|GAHT01081150.1|	Transcription	CL19772.Contig3_All	0.525	0.1184	0.2256	2.2221e-05	gi|532987267|gb|GAHU01091522.1|	0.6414	0.1153	0.1797	0	gi|225452863|ref|XP_002283766.1|	86.3	5e-16	PREDICTED: KH domain-containing protein At4g18375 [Vitis vinifera] >gi|296082939|emb|CBI22240.3| unnamed protein product [Vitis vinifera]	--	KH domain-containing protein At4g18375 OS=Arabidopsis thaliana GN=At4g18375 PE=2 SV=1	--	--	--	--	sp|P58223|Y4837_ARATH	103	8e-23	KH domain-containing protein At4g18375 OS=Arabidopsis thaliana GN=At4g18375 PE=2 SV=1	-	GO:0003676//nucleic acid binding	-
gi|532792956|gb|GAHT01025311.1|	Transcription	CL7395.Contig3_All	2.353	0.0084	0.0036	0.000101794	gi|533075388|gb|GAHU01033578.1|	0	0	0	0	gi|356513213|ref|XP_003525308.1|	230.7	1e-59	PREDICTED: pollen-specific protein SF21-like [Glycine max]	PREDICTED: Glycine max pollen-specific protein SF21-like (LOC100793778), mRNA	Pollen-specific protein SF21 OS=Helianthus annuus GN=SF21 PE=2 SV=1	gi|356513212|ref|XM_003525260.1|	115	6e-23	PREDICTED: Glycine max pollen-specific protein SF21-like (LOC100793778), mRNA	sp|O23969|SF21_HELAN	179	1e-45	Pollen-specific protein SF21 OS=Helianthus annuus GN=SF21 PE=2 SV=1	GO:0060918//auxin transport	-	-
gi|532793771|gb|GAHT01024496.1|	Secondary metabolism	Unigene30383_All	0.5681	0.0134	0.0236	0.000306018	gi|533103556|gb|GAHU01005410.1|	0	0	0.0103	0	gi|225432466|ref|XP_002278920.1|	247.3	3e-64	PREDICTED: peptide methionine sulfoxide reductase B5-like [Vitis vinifera]	Populus trichocarpa methionine sulfoxide reductase type (PtrMsrB3), mRNA	Peptide methionine sulfoxide reductase B5 OS=Oryza sativa subsp. japonica GN=MSRB5 PE=2 SV=1	gi|224102556|ref|XM_002312688.1|	170	2e-39	Populus trichocarpa methionine sulfoxide reductase type (PtrMsrB3), mRNA	sp|Q10L32|MSRB5_ORYSJ	246	3e-65	Peptide methionine sulfoxide reductase B5 OS=Oryza sativa subsp. japonica GN=MSRB5 PE=2 SV=1	GO:0055114//oxidation-reduction process	GO:0008113//peptide-methionine-(S)-S-oxide reductase activity	GO:0005634//nucleus
gi|532786906|gb|GAHT01031361.1|	Transcription	CL15518.Contig2_All	0.2493	0.0118	0.0472	0.000599714	gi|533077124|gb|GAHU01031842.1|	0.3729	0.0043	0.0115	0	gi|242050900|ref|XP_002463194.1|	1907.9	0	hypothetical protein SORBIDRAFT_02g039580 [Sorghum bicolor] >gi|241926571|gb|EER99715.1| hypothetical protein SORBIDRAFT_02g039580 [Sorghum bicolor]	Vitis vinifera contig VV78X126682.16, whole genome shotgun sequence	Probable pre-mRNA-splicing factor ATP-dependent RNA helicase OS=Arabidopsis thaliana GN=At3g26560 PE=1 SV=2	gi|147859063|emb|AM433955.2|	91.7	7e-15	Vitis vinifera contig VV78X126682.16, whole genome shotgun sequence	sp|Q38953|DHX8_ARATH	381	3e-105	Probable pre-mRNA-splicing factor ATP-dependent RNA helicase OS=Arabidopsis thaliana GN=At3g26560 PE=1 SV=2	-	GO:0046872//metal ion binding;GO:0004386//helicase activity;GO:0003676//nucleic acid binding;GO:0000166//nucleotide binding	GO:0005622//intracellular
gi|532804085|gb|GAHT01015517.1|	Signal Transdcution	CL16742.Contig1_All	0.3073	0.0081	0.0263	0.000699602	gi|533073627|gb|GAHU01035339.1|	0.1534	0.0008	0.0051	0	gi|225438325|ref|XP_002272045.1|	709.5	0	PREDICTED: diacylglycerol kinase 1-like [Vitis vinifera]	PREDICTED: Vitis vinifera diacylglycerol kinase 1-like (LOC100247408), mRNA	Diacylglycerol kinase 1 OS=Arabidopsis thaliana GN=DGK1 PE=1 SV=2	gi|359480772|ref|XM_002272009.2|	240	4e-60	PREDICTED: Vitis vinifera diacylglycerol kinase 1-like (LOC100247408), mRNA	sp|Q39017|DGK1_ARATH	556	1e-158	Diacylglycerol kinase 1 OS=Arabidopsis thaliana GN=DGK1 PE=1 SV=2	GO:0035556//intracellular signal transduction;GO:0007205//protein kinase C-activating G-protein coupled receptor signaling pathway;GO:0009611//response to wounding;GO:0009409//response to cold;GO:0048193//Golgi vesicle transport;GO:0048527//lateral root development;GO:0048366//leaf development	GO:0004143//diacylglycerol kinase activity	GO:0005634//nucleus
gi|532787861|gb|GAHT01030406.1|	Signal Transdcution	CL1745.Contig3_All	0.121	0.013	0.1077	0.00206838	gi|533068004|gb|GAHU01040962.1|	0.4832	0.0206	0.0427	0	gi|255540061|ref|XP_002511095.1|	915.2	0	Signal recognition particle 68 kDa protein, putative [Ricinus communis] >gi|223550210|gb|EEF51697.1| Signal recognition particle 68 kDa protein, putative [Ricinus communis]	PREDICTED: Vitis vinifera signal recognition particle 68 kDa protein-like (LOC100262919), mRNA	--	gi|359491137|ref|XM_002284541.2|	208	2e-50	PREDICTED: Vitis vinifera signal recognition particle 68 kDa protein-like (LOC100262919), mRNA	--	--	--	--	-	-	GO:0005634//nucleus;GO:0005829//cytosol
gi|532801537|gb|GAHT01018065.1|	Cell growth/division	CL3089.Contig3_All	1.2368	0.014	0.0113	0.00244888	gi|533093000|gb|GAHU01015966.1|	0.305	0.0005	0.0016	0	gi|296086345|emb|CBI31934.3|	854.7	0	unnamed protein product [Vitis vinifera]	PREDICTED: Glycine max uncharacterized protein LOC100790366 (LOC100790366), mRNA	Nucleolin 2 OS=Oryza sativa subsp. japonica GN=Os04g0620700 PE=2 SV=2	gi|356502556|ref|XM_003520037.1|	103	1e-18	PREDICTED: Glycine max uncharacterized protein LOC100790366 (LOC100790366), mRNA	sp|Q7XTT4|NUCL2_ORYSJ	72	2e-12	Nucleolin 2 OS=Oryza sativa subsp. japonica GN=Os04g0620700 PE=2 SV=2	GO:0009987//cellular process	-	GO:0005737//cytoplasm
gi|532748082|gb|GAHT01069288.1|	Signal Transdcution	CL18338.Contig4_All	0.4696	0.1505	0.3204	0.0028512	gi|533057944|gb|GAHU01050776.1|	0.8308	0.0816	0.0982	0	gi|108707535|gb|ABF95330.1|	147.9	2e-34	expressed protein [Oryza sativa Japonica Group]	Musa balbisiana clone BAC MBP-64B17, complete sequence	Proline-rich receptor-like protein kinase PERK9 OS=Arabidopsis thaliana GN=PERK9 PE=2 SV=1	gi|189011756|gb|AC226052.1|	61.9	1e-06	Musa balbisiana clone BAC MBP-64B17, complete sequence	sp|Q9SX31|PERK9_ARATH	49.7	3e-06	Proline-rich receptor-like protein kinase PERK9 OS=Arabidopsis thaliana GN=PERK9 PE=2 SV=1	GO:0016973//poly(A)+ mRNA export from nucleus	-	GO:0005634//nucleus
gi|532804571|gb|GAHT01015031.1|	Transcription	CL20932.Contig3_All	0.231	0.0279	0.1208	0.00319232	gi|533095243|gb|GAHU01013723.1|	0.6136	0.0382	0.0623	0	gi|225442450|ref|XP_002277939.1|	948	0	PREDICTED: poly(A) polymerase-like [Vitis vinifera]	PREDICTED: Brachypodium distachyon poly(A) polymerase-like (LOC100844248), mRNA	--	gi|357124125|ref|XM_003563709.1|	404	1e-109	PREDICTED: Brachypodium distachyon poly(A) polymerase-like (LOC100844248), mRNA	--	--	--	--	GO:0000911//cytokinesis by cell plate formation;GO:0016192//vesicle-mediated transport;GO:0006623//protein targeting to vacuole;GO:0043631//RNA polyadenylation;GO:0000956//nuclear-transcribed mRNA catabolic process;GO:0006944//cellular membrane fusion;GO:0006351//transcription, DNA-dependent	GO:0003723//RNA binding;GO:0005515//protein binding;GO:0004652//polynucleotide adenylyltransferase activity	GO:0005634//nucleus
gi|532786689|gb|GAHT01031578.1|	Protein Destination and Storage	Unigene14014_All	0.2598	0.0044	0.017	0.00365515	gi|533065591|gb|GAHU01043375.1|	0.3197	0.001	0.0031	0	gi|302142198|emb|CBI19401.3|	661.8	0	unnamed protein product [Vitis vinifera]	PREDICTED: Vitis vinifera DNA excision repair protein ERCC-8-like (LOC100247086), mRNA	Outer row dynein assembly protein 16 OS=Chlamydomonas reinhardtii GN=ODA16 PE=1 SV=1	gi|225458837|ref|XM_002285288.1|	305	8e-80	PREDICTED: Vitis vinifera DNA excision repair protein ERCC-8-like (LOC100247086), mRNA	sp|Q3Y8L7|WDR69_CHLRE	84.3	2e-16	Outer row dynein assembly protein 16 OS=Chlamydomonas reinhardtii GN=ODA16 PE=1 SV=1	GO:0006281//DNA repair;GO:0010224//response to UV-B;GO:0016573//histone acetylation	GO:0000166//nucleotide binding;GO:0004402//histone acetyltransferase activity	GO:0005739//mitochondrion;GO:0080008//Cul4-RING ubiquitin ligase complex;GO:0005834//heterotrimeric G-protein complex;GO:0005634//nucleus
gi|532751100|gb|GAHT01066270.1|	Transcription Factor	CL16829.Contig1_All	0.2005	0.0061	0.0302	0.00824956	gi|533061182|gb|GAHU01047784.1|	0.6656	0.0561	0.0843	0	gi|62867345|dbj|BAD95987.1|	355.9	6e-97	MADS-box transcription factor AP3 [Agapanthus praecox]	Agapanthus praecox ApDEF mRNA for MADS-box transcription factor AP3, complete cds	MADS-box transcription factor 16 OS=Oryza sativa subsp. japonica GN=MADS16 PE=1 SV=2	gi|62867344|dbj|AB177941.1|	498	1e-138	Agapanthus praecox ApDEF mRNA for MADS-box transcription factor AP3, complete cds	sp|Q944S9|MAD16_ORYSJ	264	8e-71	MADS-box transcription factor 16 OS=Oryza sativa subsp. japonica GN=MADS16 PE=1 SV=2	GO:0006355//regulation of transcription, DNA-dependent	GO:0003700//sequence-specific DNA binding transcription factor activity;GO:0003677//DNA binding;GO:0046983//protein dimerization activity	GO:0005634//nucleus
gi|532762393|gb|GAHT01055857.1|	Cell Structure	CL4378.Contig2_All	0.3168	0.0063	0.0199	0.0099366	gi|533063255|gb|GAHU01045711.1|	0.5294	0.0293	0.0554	0	gi|357130698|ref|XP_003566984.1|	366.7	4e-100	PREDICTED: PAP-associated domain-containing protein 5-like [Brachypodium distachyon]	PREDICTED: Brachypodium distachyon PAP-associated domain-containing protein 5-like (LOC100828283), mRNA	--	gi|357130697|ref|XM_003566936.1|	119	7e-24	PREDICTED: Brachypodium distachyon PAP-associated domain-containing protein 5-like (LOC100828283), mRNA	--	--	--	--	GO:0009560//embryo sac egg cell differentiation;GO:0006312//mitotic recombination;GO:0009688//abscisic acid biosynthetic process	GO:0016779//nucleotidyltransferase activity;GO:0003676//nucleic acid binding	GO:0005634//nucleus
gi|532787337|gb|GAHT01030930.1|	Transcription	CL15957.Contig2_All	0.3061	0.0157	0.0514	0.0109527	gi|533068275|gb|GAHU01040691.1|	0.1677	0.0013	0.0079	0	gi|363543195|ref|NP_001241811.1|	402.9	6e-111	RNA-binding protein Nova-1 [Zea mays] >gi|195659123|gb|ACG49029.1| RNA-binding protein Nova-1 [Zea mays]	PREDICTED: Vitis vinifera RNA-binding protein Nova-1-like (LOC100258231), mRNA	KH domain-containing protein At4g18375 OS=Arabidopsis thaliana GN=At4g18375 PE=2 SV=1	gi|359486524|ref|XM_002264295.2|	101	2e-18	PREDICTED: Vitis vinifera RNA-binding protein Nova-1-like (LOC100258231), mRNA	sp|P58223|Y4837_ARATH	69.7	4e-12	KH domain-containing protein At4g18375 OS=Arabidopsis thaliana GN=At4g18375 PE=2 SV=1	GO:0008380//RNA splicing	GO:0003676//nucleic acid binding	GO:0005634//nucleus;GO:0009536//plastid
gi|532805477|gb|GAHT01014125.1|	Protein Destination and Storage	CL5082.Contig2_All	0.1779	0.0162	0.0911	0.0112353	gi|533085141|gb|GAHU01023825.1|	0	0	0.0076	0	gi|225457441|ref|XP_002262921.1|	680.2	0	PREDICTED: 26S proteasome non-ATPase regulatory subunit 6 [Vitis vinifera] >gi|297733617|emb|CBI14864.3| unnamed protein product [Vitis vinifera]	PREDICTED: Vitis vinifera 26S proteasome non-ATPase regulatory subunit 6-like (LOC100258219), mRNA	26S proteasome non-ATPase regulatory subunit 6 OS=Oryza sativa subsp. japonica GN=RPN7 PE=2 SV=1	gi|225457440|ref|XM_002262885.1|	496	1e-137	PREDICTED: Vitis vinifera 26S proteasome non-ATPase regulatory subunit 6-like (LOC100258219), mRNA	sp|Q8W425|PSMD6_ORYSJ	658	0	26S proteasome non-ATPase regulatory subunit 6 OS=Oryza sativa subsp. japonica GN=RPN7 PE=2 SV=1	-	-	GO:0000502//proteasome complex;GO:0005886//plasma membrane
gi|532789422|gb|GAHT01028845.1|	Unclassified	CL6696.Contig1_All	0.4792	0.2119	0.4422	0.0122392	gi|533051679|gb|GAHU01056013.1|	0.6452	0.1231	0.1907	0	gi|224063537|ref|XP_002301193.1|	145.6	8e-34	predicted protein [Populus trichocarpa] >gi|222842919|gb|EEE80466.1| predicted protein [Populus trichocarpa]	--	--	--	--	--	--	--	--	--	--	GO:0071554;GO:0009987//cellular process;GO:0043170	-	-
gi|532799696|gb|GAHT01019906.1|	Unclassified	CL19645.Contig1_All	0.9596	0.0077	0.008	0.0133537	gi|533076369|gb|GAHU01032597.1|	0	0	0.0077	0	gi|302144099|emb|CBI23204.3|	246.9	3e-64	unnamed protein product [Vitis vinifera]	PREDICTED: Brachypodium distachyon uncharacterized LOC100843397 (LOC100843397), mRNA	--	gi|357113472|ref|XM_003558479.1|	81.8	1e-12	PREDICTED: Brachypodium distachyon uncharacterized LOC100843397 (LOC100843397), mRNA	--	--	--	--	GO:0009616//virus induced gene silencing;GO:0010050//vegetative phase change	-	GO:0005768//endosome;GO:0005794//Golgi apparatus;GO:0005634//nucleus;GO:0005802//trans-Golgi network
gi|532752350|gb|GAHT01065020.1|	Unclassified	CL18862.Contig2_All	0.3163	0.0092	0.0292	0.0133606	gi|533065787|gb|GAHU01043179.1|	0	0	0.029	0	gi|242049876|ref|XP_002462682.1|	133.7	1e-30	hypothetical protein SORBIDRAFT_02g030140 [Sorghum bicolor] >gi|241926059|gb|EER99203.1| hypothetical protein SORBIDRAFT_02g030140 [Sorghum bicolor]	Arabidopsis thaliana chromosome 4, complete sequence	--	gi|332656411|gb|CP002687.1|	65.9	4e-08	Arabidopsis thaliana chromosome 4, complete sequence	--	--	--	--	-	-	-
gi|532765623|gb|GAHT01052644.1|	Cell growth/division	CL12171.Contig2_All	0.4737	0.0066	0.0139	0.0134976	gi|533071984|gb|GAHU01036982.1|	0.5118	0.0052	0.0101	0	gi|222624231|gb|EEE58363.1|	912.1	0	hypothetical protein OsJ_09500 [Oryza sativa Japonica Group]	PREDICTED: Vitis vinifera uncharacterized LOC100852899 (LOC100852899), mRNA	Nuclear-pore anchor OS=Arabidopsis thaliana GN=NUA PE=1 SV=1	gi|359479666|ref|XM_003632278.1|	256	3e-64	PREDICTED: Vitis vinifera uncharacterized LOC100852899 (LOC100852899), mRNA	sp|A4GSN8|NUA_ARATH	96.7	2e-19	Nuclear-pore anchor OS=Arabidopsis thaliana GN=NUA PE=1 SV=1	GO:0009987//cellular process;GO:0048856//anatomical structure development;GO:0007275//multicellular organismal development	-	-
gi|532814392|gb|GAHT01006532.1|	Transcription Factor	CL7742.Contig4_All	0.2745	0.0543	0.1979	0.0173805	gi|533091223|gb|GAHU01017743.1|	0.3662	0.0071	0.0193	0	gi|115447669|ref|NP_001047614.1|	237.3	3e-61	Os02g0654700 [Oryza sativa Japonica Group] >gi|56567585|gb|AAV98702.1| BTH-induced ERF transcriptional factor 3 [Oryza sativa Indica Group] >gi|113537145|dbj|BAF09528.1| Os02g0654700 [Oryza sativa Japonica Group]	Camellia sinensis ERF transcription factor mRNA, complete cds	Ethylene-responsive transcription factor 2 OS=Nicotiana tabacum GN=ERF2 PE=2 SV=1	gi|288872657|gb|GU393024.1|	192	6e-46	Camellia sinensis ERF transcription factor mRNA, complete cds	sp|Q40479|ERF2_TOBAC	203	2e-52	Ethylene-responsive transcription factor 2 OS=Nicotiana tabacum GN=ERF2 PE=2 SV=1	GO:0006351//transcription, DNA-dependent	-	-
gi|532797546|gb|GAHT01022056.1|	Protein Synthesis	CL13723.Contig2_All	0.1832	0.0067	0.0364	0.0320056	gi|533070896|gb|GAHU01038070.1|	0.8597	0.0398	0.0463	0	gi|1143069|gb|AAB61310.1|	595.5	7e-169	3-ketoacyl carrier protein synthase III [Allium ampeloprasum]	Elaeis oleifera 3-ketoacyl-acyl carrier protein synthase III mRNA, complete cds	3-oxoacyl-[acyl-carrier-protein] synthase III, chloroplastic OS=Arabidopsis thaliana GN=At1g62640 PE=2 SV=2	gi|92111313|gb|DQ459442.1|	297	2e-77	Elaeis oleifera 3-ketoacyl-acyl carrier protein synthase III mRNA, complete cds	sp|P49243|FABH_ARATH	494	5e-140	3-oxoacyl-[acyl-carrier-protein] synthase III, chloroplastic OS=Arabidopsis thaliana GN=At1g62640 PE=2 SV=2	GO:0006633//fatty acid biosynthetic process	GO:0033818;GO:0004315//3-oxoacyl-[acyl-carrier-protein] synthase activity	GO:0005737//cytoplasm
gi|532796032|gb|GAHT01023090.1|	Unclassified	Unigene9878_All	0.1002	0.0117	0.1163	0.0363424	gi|533093901|gb|GAHU01015065.1|	0.1575	0.0016	0.0102	0	#N/A	#N/A	#N/A	#N/A	#N/A	#N/A	#N/A	#N/A	#N/A	#N/A	#N/A	#N/A	#N/A	#N/A	#N/A	#N/A	#N/A
gi|532779055|gb|GAHT01039212.1|	Transcription	CL19359.Contig1_All	0.1465	0.0171	0.1167	0.0374553	gi|533071146|gb|GAHU01037820.1|	0.3234	0.0007	0.0021	0	gi|359478798|ref|XP_002283658.2|	864	0	PREDICTED: uncharacterized protein LOC100263945 [Vitis vinifera]	PREDICTED: Vitis vinifera uncharacterized LOC100263945 (LOC100263945), mRNA	Mediator of RNA polymerase II transcription subunit 13 OS=Arabidopsis thaliana GN=MED13 PE=1 SV=1	gi|359478797|ref|XM_002283622.2|	79.8	1e-11	PREDICTED: Vitis vinifera uncharacterized LOC100263945 (LOC100263945), mRNA	sp|F4I096|MED13_ARATH	659	0	Mediator of RNA polymerase II transcription subunit 13 OS=Arabidopsis thaliana GN=MED13 PE=1 SV=1	GO:0090213//regulation of radial pattern formation;GO:0008152//metabolic process;GO:0040034//regulation of development, heterochronic	-	GO:0005634//nucleus
gi|532777557|gb|GAHT01040710.1|	Signal Transdcution	CL9817.Contig1_All	0.5378	0.0059	0.011	0.0398899	gi|533057833|gb|GAHU01050887.1|	0	0	0.0042	0	gi|363806708|ref|NP_001242268.1|	394.4	2e-108	uncharacterized protein LOC100776545 [Glycine max]	--	Hypersensitive-induced response protein 3 OS=Arabidopsis thaliana GN=HIR3 PE=1 SV=1	--	--	--	--	sp|Q9SRH6|HIR3_ARATH	85.1	1e-16	Hypersensitive-induced response protein 3 OS=Arabidopsis thaliana GN=HIR3 PE=1 SV=1	-	GO:0008270//zinc ion binding	GO:0016020//membrane;GO:0005739//mitochondrion
gi|532766852|gb|GAHT01051415.1|	Transcription Factor	CL11818.Contig2_All	0.2122	0.0714	0.3365	0.0520151	gi|533099087|gb|GAHU01009879.1|	0.3003	0.0014	0.0046	0	gi|302142109|emb|CBI19312.3|	325.9	1e-87	unnamed protein product [Vitis vinifera]	Hordeum vulgare subsp. vulgare inducer of CBF expression 2 (ICE2) mRNA, partial cds	Transcription factor bHLH93 OS=Arabidopsis thaliana GN=BHLH93 PE=1 SV=1	gi|75706691|gb|DQ151537.1|	117	4e-23	Hordeum vulgare subsp. vulgare inducer of CBF expression 2 (ICE2) mRNA, partial cds	sp|Q9LSL1|BH093_ARATH	248	6e-66	Transcription factor bHLH93 OS=Arabidopsis thaliana GN=BHLH93 PE=1 SV=1	-	-	-
gi|532798573|gb|GAHT01021029.1|	Primary Metabolism	CL1296.Contig8_All	0.1717	0.0107	0.0623	0.0878662	gi|533088691|gb|GAHU01020275.1|	0.1479	0.002	0.0136	0	gi|225462533|ref|XP_002265606.1|	645.6	0	PREDICTED: ethanolamine-phosphate cytidylyltransferase [Vitis vinifera]	Oryza sativa Japonica Group cDNA, clone: J100072P04, full insert sequence	BTB/POZ and MATH domain-containing protein 2 OS=Arabidopsis thaliana GN=BPM2 PE=1 SV=1	gi|116012846|dbj|AK243481.1|	299	9e-78	Oryza sativa Japonica Group cDNA, clone: J100072P04, full insert sequence	sp|Q9M8J9|BPM2_ARATH	576	2e-164	BTB/POZ and MATH domain-containing protein 2 OS=Arabidopsis thaliana GN=BPM2 PE=1 SV=1	GO:0071472//cellular response to salt stress;GO:0009058//biosynthetic process;GO:0042631//cellular response to water deprivation	GO:0016779//nucleotidyltransferase activity	GO:0005634//nucleus
gi|532742635|gb|GAHT01074735.1|	Disease/defense	CL13362.Contig1_All	0.1901	0.1203	0.6326	0.0948998	gi|533015324|gb|GAHU01077559.1|	0.4001	0.0295	0.0736	0	gi|255590183|ref|XP_002535195.1|	880.2	0	Receptor protein kinase CLAVATA1 precursor, putative [Ricinus communis] >gi|223523778|gb|EEF27188.1| Receptor protein kinase CLAVATA1 precursor, putative [Ricinus communis]	PREDICTED: Brachypodium distachyon leucine-rich repeat receptor-like protein kinase PXL2-like (LOC100843232), mRNA	Leucine-rich repeat receptor-like protein kinase PXL2 OS=Arabidopsis thaliana GN=PXL2 PE=2 SV=1	gi|357120772|ref|XM_003562051.1|	73.8	6e-10	PREDICTED: Brachypodium distachyon leucine-rich repeat receptor-like protein kinase PXL2-like (LOC100843232), mRNA	sp|Q9M0G7|PXL2_ARATH	776	0	Leucine-rich repeat receptor-like protein kinase PXL2 OS=Arabidopsis thaliana GN=PXL2 PE=2 SV=1	GO:0016310//phosphorylation	GO:0004674//protein serine/threonine kinase activity;GO:0016491//oxidoreductase activity;GO:0000166//nucleotide binding	GO:0016023//cytoplasmic membrane-bounded vesicle;GO:0016020//membrane
gi|532748259|gb|GAHT01069111.1|	Unclassified	CL2470.Contig1_All	1.7887	0.0167	0.0094	0.100295	gi|533044517|gb|GAHU01063049.1|	0.2547	0.0087	0.0343	0	gi|358344028|ref|XP_003636096.1|	54.3	7e-06	hypothetical protein MTR_027s0011 [Medicago truncatula] >gi|355502031|gb|AES83234.1| hypothetical protein MTR_027s0011 [Medicago truncatula]	M.truncatula DNA sequence from clone MTH2-16N8 on chromosome 3, complete sequence	--	gi|111186391|emb|CT961056.6|	63.9	5e-07	M.truncatula DNA sequence from clone MTH2-16N8 on chromosome 3, complete sequence	--	--	--	--	-	-	-
gi|532788802|gb|GAHT01029465.1|	Cell growth/division	CL2588.Contig1_All	0.2774	0.024	0.0866	0.100828	gi|533087256|gb|GAHU01021710.1|	0.7185	0.0261	0.0363	0	gi|359489827|ref|XP_002276292.2|	1306.2	0	PREDICTED: uncharacterized protein LOC100262009 [Vitis vinifera]	PREDICTED: Vitis vinifera uncharacterized LOC100262009 (LOC100262009), mRNA	Vegetative cell wall protein gp1 OS=Chlamydomonas reinhardtii GN=GP1 PE=2 SV=1	gi|359489826|ref|XM_002276256.2|	212	2e-51	PREDICTED: Vitis vinifera uncharacterized LOC100262009 (LOC100262009), mRNA	sp|Q9FPQ6|GP1_CHLRE	64.7	3e-10	Vegetative cell wall protein gp1 OS=Chlamydomonas reinhardtii GN=GP1 PE=2 SV=1	GO:0019375//galactolipid biosynthetic process;GO:0001666//response to hypoxia	GO:0016757//transferase activity, transferring glycosyl groups	GO:0005768//endosome;GO:0005794//Golgi apparatus;GO:0005802//trans-Golgi network;GO:0005739//mitochondrion
gi|532801946|gb|GAHT01017656.1|	Unclassified	CL11384.Contig1_All	0.6858	0.0163	0.0238	0.107129	gi|533053759|gb|GAHU01054593.1|	0.5986	0.1041	0.174	0	gi|293334225|ref|NP_001169771.1|	290.4	5e-77	uncharacterized protein LOC100383656 [Zea mays]	Zea mays uncharacterized LOC100383656 (LOC100383656), mRNA >gi|224031578|gb|BT067968.1| Zea mays full-length cDNA clone ZM_BFb0016N10 mRNA, complete cds	--	gi|293334224|ref|NM_001176300.1|	71.9	2e-09	Zea mays uncharacterized LOC100383656 (LOC100383656), mRNA >gi|224031578|gb|BT067968.1| Zea mays full-length cDNA clone ZM_BFb0016N10 mRNA, complete cds	--	--	--	--	-	-	-
gi|532809292|gb|GAHT01011260.1|	Intracellular traffic	CL9718.Contig4_All	0.1564	0.0189	0.121	0.124309	gi|533097426|gb|GAHU01011540.1|	0.1505	0.0012	0.0082	0	gi|225446891|ref|XP_002284045.1|	587.4	1e-166	PREDICTED: endoplasmic reticulum-Golgi intermediate compartment protein 3 [Vitis vinifera] >gi|296086333|emb|CBI31774.3| unnamed protein product [Vitis vinifera]	PREDICTED: Vitis vinifera endoplasmic reticulum-Golgi intermediate compartment protein 3-like (LOC100260862), mRNA	Protein disulfide-isomerase 5-4 OS=Arabidopsis thaliana GN=PDIL5-4 PE=2 SV=1	gi|359485155|ref|XM_002284009.2|	353	3e-94	PREDICTED: Vitis vinifera endoplasmic reticulum-Golgi intermediate compartment protein 3-like (LOC100260862), mRNA	sp|Q9T042|PDI54_ARATH	87	3e-17	Protein disulfide-isomerase 5-4 OS=Arabidopsis thaliana GN=PDIL5-4 PE=2 SV=1	-	-	GO:0005783//endoplasmic reticulum
gi|532709667|gb|GAHT01107074.1|	Unclassified	CL2547.Contig2_All	0.0863	0.0057	0.0658	0.144913	gi|532946007|gb|GAHU01112312.1|	0	0	0.009	0	gi|222619195|gb|EEE55327.1|	263.8	1e-69	hypothetical protein OsJ_03330 [Oryza sativa Japonica Group]	Oryza sativa clone RRlibB00607 mRNA sequence	HVA22-like protein f OS=Arabidopsis thaliana GN=HVA22F PE=2 SV=1	gi|347659677|gb|BT130029.1|	101	9e-19	Oryza sativa clone RRlibB00607 mRNA sequence	sp|Q682H0|HA22F_ARATH	231	2e-61	HVA22-like protein f OS=Arabidopsis thaliana GN=HVA22F PE=2 SV=1	-	-	GO:0016020//membrane
gi|532803892|gb|GAHT01015710.1|	Transcription Factor	CL1006.Contig3_All	0.2667	0.0604	0.2263	0.157794	gi|533075940|gb|GAHU01033026.1|	0.4601	0.0169	0.0366	0	gi|225456475|ref|XP_002284543.1|	1013.1	0	PREDICTED: auxin response factor 2 [Vitis vinifera] >gi|297734502|emb|CBI15749.3| unnamed protein product [Vitis vinifera]	PREDICTED: Vitis vinifera auxin response factor 2-like (LOC100268072), mRNA	Auxin response factor 2 OS=Arabidopsis thaliana GN=ARF2 PE=1 SV=2	gi|359491136|ref|XM_002284507.2|	343	7e-91	PREDICTED: Vitis vinifera auxin response factor 2-like (LOC100268072), mRNA	sp|Q94JM3|ARFB_ARATH	922	0	Auxin response factor 2 OS=Arabidopsis thaliana GN=ARF2 PE=1 SV=2	GO:0042744//hydrogen peroxide catabolic process;GO:0010227//floral organ abscission;GO:0009911//positive regulation of flower development;GO:0045892//negative regulation of transcription, DNA-dependent;GO:0008285//negative regulation of cell proliferation;GO:0010150//leaf senescence;GO:0009737//response to abscisic acid stimulus;GO:0010047//fruit dehiscence;GO:0048481//ovule development	GO:0005515//protein binding;GO:0043565//sequence-specific DNA binding;GO:0003700//sequence-specific DNA binding transcription factor activity	GO:0005634//nucleus
gi|532812845|gb|GAHT01008079.1|	Transporter	CL10197.Contig1_All	0.1806	0.0131	0.0725	0.169161	gi|533099094|gb|GAHU01009872.1|	0	0	0.0087	0	gi|242054169|ref|XP_002456230.1|	373.2	6e-102	hypothetical protein SORBIDRAFT_03g032510 [Sorghum bicolor] >gi|241928205|gb|EES01350.1| hypothetical protein SORBIDRAFT_03g032510 [Sorghum bicolor]	PREDICTED: Vitis vinifera vesicle transport v-SNARE 13-like (LOC100264508), mRNA	Vesicle transport v-SNARE 11 OS=Arabidopsis thaliana GN=VTI11 PE=1 SV=2	gi|225452896|ref|XM_002283936.1|	182	7e-43	PREDICTED: Vitis vinifera vesicle transport v-SNARE 13-like (LOC100264508), mRNA	sp|Q9SEL6|VTI11_ARATH	328	4e-90	Vesicle transport v-SNARE 11 OS=Arabidopsis thaliana GN=VTI11 PE=1 SV=2	GO:0006623//protein targeting to vacuole;GO:0006944//cellular membrane fusion;GO:0016192//vesicle-mediated transport	-	GO:0005622//intracellular;GO:0005886//plasma membrane
gi|532769182|gb|GAHT01049085.1|	Secondary metabolism	CL5648.Contig2_All	0.0435	0.0021	0.0486	0.172341	gi|533080854|gb|GAHU01028112.1|	0.1413	0.0026	0.0186	0	gi|326500264|dbj|BAK06221.1|	448	1e-124	predicted protein [Hordeum vulgare subsp. vulgare] >gi|326500986|dbj|BAJ98724.1| predicted protein [Hordeum vulgare subsp. vulgare] >gi|326530618|dbj|BAK01107.1| predicted protein [Hordeum vulgare subsp. vulgare]	Medicago truncatula Purple acid phosphatase (MTR_8g107620) mRNA, complete cds	Purple acid phosphatase 3 OS=Arabidopsis thaliana GN=PAP3 PE=2 SV=1	gi|357521708|ref|XM_003631095.1|	61.9	1e-06	Medicago truncatula Purple acid phosphatase (MTR_8g107620) mRNA, complete cds	sp|Q8H129|PPA3_ARATH	397	5e-111	Purple acid phosphatase 3 OS=Arabidopsis thaliana GN=PAP3 PE=2 SV=1	GO:0009987//cellular process	GO:0003993//acid phosphatase activity	GO:0016023//cytoplasmic membrane-bounded vesicle
gi|532810146|gb|GAHT01010511.1|	Unclassified	CL9074.Contig1_All	0.2016	0.0053	0.0262	0.237299	gi|533072152|gb|GAHU01036814.1|	0.1584	0.0015	0.0095	0	gi|225457415|ref|XP_002284912.1|	427.6	1e-118	PREDICTED: uncharacterized protein LOC100250124 [Vitis vinifera] >gi|297733975|emb|CBI15222.3| unnamed protein product [Vitis vinifera]	Solanum lycopersicum cDNA, clone: LEFL1065AD10, HTC in leaf	--	gi|225318845|dbj|AK323803.1|	168	8e-39	Solanum lycopersicum cDNA, clone: LEFL1065AD10, HTC in leaf	--	--	--	--	-	GO:0008270//zinc ion binding	-
gi|532791946|gb|GAHT01026321.1|	Unclassified	CL1815.Contig1_All	0.3161	0.0511	0.1616	0.252637	gi|533085714|gb|GAHU01023252.1|	0.7274	0.0317	0.0435	0	gi|359488862|ref|XP_003633834.1|	755.7	0	PREDICTED: uncharacterized protein LOC100252575 [Vitis vinifera]	PREDICTED: Vitis vinifera uncharacterized LOC100252575 (LOC100252575), mRNA	--	gi|359488861|ref|XM_003633786.1|	101	4e-18	PREDICTED: Vitis vinifera uncharacterized LOC100252575 (LOC100252575), mRNA	--	--	--	--	GO:0080090//regulation of primary metabolic process;GO:0016070//RNA metabolic process;GO:2000112;GO:0035195//gene silencing by miRNA	-	GO:0043229//intracellular organelle
gi|532782881|gb|GAHT01035386.1|	Protein Destination and Storage	CL13652.Contig4_All	0.3818	0.038	0.0995	0.272791	gi|533080826|gb|GAHU01028140.1|	0	0	0.0135	0	gi|255550758|ref|XP_002516427.1|	310.8	1e-83	Protein YME1, putative [Ricinus communis] >gi|223544247|gb|EEF45768.1| Protein YME1, putative [Ricinus communis]	PREDICTED: Vitis vinifera ATP-dependent zinc metalloprotease FTSH 4, mitochondrial-like (LOC100252645), mRNA	ATP-dependent zinc metalloprotease FTSH 5, mitochondrial OS=Oryza sativa subsp. japonica GN=FTSH5 PE=3 SV=1	gi|359476238|ref|XM_002278969.2|	218	7e-54	PREDICTED: Vitis vinifera ATP-dependent zinc metalloprotease FTSH 4, mitochondrial-like (LOC100252645), mRNA	sp|Q8LQJ8|FTSH5_ORYSJ	291	3e-79	ATP-dependent zinc metalloprotease FTSH 5, mitochondrial OS=Oryza sativa subsp. japonica GN=FTSH5 PE=3 SV=1	GO:0009987//cellular process;GO:0009056//catabolic process;GO:0019538//protein metabolic process	GO:0004175//endopeptidase activity;GO:0004176//ATP-dependent peptidase activity;GO:0008237//metallopeptidase activity;GO:0000166//nucleotide binding	GO:0005739//mitochondrion;GO:0009536//plastid;GO:0016020//membrane
gi|532777026|gb|GAHT01041241.1|	Secondary metabolism	Unigene3890_All	0	0.0044	0	0.275956	gi|533087636|gb|GAHU01021330.1|	0.6692	0.0022	0.0033	0	gi|255548199|ref|XP_002515156.1|	386.3	6e-106	monoxygenase, putative [Ricinus communis] >gi|223545636|gb|EEF47140.1| monoxygenase, putative [Ricinus communis]	--	Zeaxanthin epoxidase, chloroplastic OS=Prunus armeniaca PE=2 SV=1	--	--	--	--	sp|O81360|ABA2_PRUAR	57	3e-08	Zeaxanthin epoxidase, chloroplastic OS=Prunus armeniaca PE=2 SV=1	GO:0009617//response to bacterium	-	GO:0005783//endoplasmic reticulum
gi|532765174|gb|GAHT01053093.1|	Unclassified	CL8917.Contig3_All	0.473	0.0525	0.111	0.282838	gi|533059981|gb|GAHU01048985.1|	0.5351	0.0042	0.0079	0	gi|225430107|ref|XP_002281922.1|	646.4	0	PREDICTED: uncharacterized protein LOC100264575 [Vitis vinifera]	PREDICTED: Glycine max uncharacterized protein LOC100781230 (LOC100781230), mRNA	--	gi|356554353|ref|XM_003545464.1|	111	4e-21	PREDICTED: Glycine max uncharacterized protein LOC100781230 (LOC100781230), mRNA	--	--	--	--	GO:0070918//production of small RNA involved in gene silencing by RNA;GO:0035194//posttranscriptional gene silencing by RNA	-	-
gi|532777737|gb|GAHT01040530.1|	Transcription	CL13656.Contig2_All	0.1971	0.0369	0.1873	0.295655	gi|533016917|gb|GAHU01076713.1|	0	0	0.0114	0	gi|354805151|gb|AER41571.1|	365.2	9e-100	C2-BTB1+-+Bric-a-Brac+Tramtrack+Broad+Complex+BTB+domain+with+C2+subfamily [Oryza brachyantha]	Oryza sativa (indica cultivar-group) cDNA clone:OSIGCEA034M23, full insert sequence	BTB/POZ domain-containing protein At4g08455 OS=Arabidopsis thaliana GN=At4g08455 PE=1 SV=1	gi|116632889|emb|CT832693.1|	147	3e-32	Oryza sativa (indica cultivar-group) cDNA clone:OSIGCEA034M23, full insert sequence	sp|Q6DBN1|Y4845_ARATH	310	7e-85	BTB/POZ domain-containing protein At4g08455 OS=Arabidopsis thaliana GN=At4g08455 PE=1 SV=1	-	GO:0005515//protein binding	GO:0005737//cytoplasm
gi|532778410|gb|GAHT01039857.1|	Transcription	CL11894.Contig2_All	0.2965	0.0279	0.0941	0.302069	gi|533077733|gb|GAHU01031233.1|	0.382	0.0059	0.0154	0	gi|225445605|ref|XP_002282408.1|	934.5	0	PREDICTED: CCR4-NOT transcription complex subunit 10-like [Vitis vinifera]	PREDICTED: Vitis vinifera CCR4-NOT transcription complex subunit 10-like (LOC100252496), mRNA	--	gi|225445604|ref|XM_002282372.1|	79.8	1e-11	PREDICTED: Vitis vinifera CCR4-NOT transcription complex subunit 10-like (LOC100252496), mRNA	--	--	--	--	GO:0006007//glucose catabolic process	-	-
gi|532748745|gb|GAHT01068625.1|	Disease/defense	CL2269.Contig13_All	0.3283	0.0472	0.1438	0.311964	gi|533044492|gb|GAHU01063074.1|	0	0	0	0	gi|115444563|ref|NP_001046061.1|	848.2	0	Os02g0176100 [Oryza sativa Japonica Group] >gi|113535592|dbj|BAF07975.1| Os02g0176100 [Oryza sativa Japonica Group]	Oryza sativa Japonica Group Os07g0565400 (Os07g0565400) mRNA, partial cds	Protein STRUBBELIG-RECEPTOR FAMILY 3 OS=Arabidopsis thaliana GN=SRF3 PE=1 SV=1	gi|297607465|ref|NM_001066546.2|	87.7	5e-14	Oryza sativa Japonica Group Os07g0565400 (Os07g0565400) mRNA, partial cds	sp|Q6R2K3|SRF3_ARATH	721	0	Protein STRUBBELIG-RECEPTOR FAMILY 3 OS=Arabidopsis thaliana GN=SRF3 PE=1 SV=1	GO:0009987//cellular process;GO:0007623//circadian rhythm	GO:0004672//protein kinase activity	GO:0005739//mitochondrion;GO:0005886//plasma membrane
gi|532766282|gb|GAHT01051985.1|	Secondary metabolism	CL4652.Contig3_All	0.274	0.0147	0.0536	0.323043	gi|532998890|gb|GAHU01085656.1|	0	0	0.006	0	gi|357147739|ref|XP_003574465.1|	499.2	6e-140	PREDICTED: uncharacterized glycosyl hydrolase Rv2006/MT2062-like [Brachypodium distachyon]	PREDICTED: Vitis vinifera trehalose-phosphate phosphatase-like (LOC100243648), mRNA	Probable trehalose-phosphate phosphatase 6 OS=Oryza sativa subsp. japonica GN=TPP6 PE=2 SV=1	gi|359492438|ref|XM_002284165.2|	163	6e-37	PREDICTED: Vitis vinifera trehalose-phosphate phosphatase-like (LOC100243648), mRNA	sp|Q6ZAL2|TPP6_ORYSJ	486	1e-137	Probable trehalose-phosphate phosphatase 6 OS=Oryza sativa subsp. japonica GN=TPP6 PE=2 SV=1	GO:0046686//response to cadmium ion;GO:0005992//trehalose biosynthetic process	GO:0004805//trehalose-phosphatase activity	GO:0009507//chloroplast;GO:0005634//nucleus
gi|532796105|gb|GAHT01023074.1|	Unclassified	CL11521.Contig1_All	0	0.0055	0	0.362615	gi|533079758|gb|GAHU01029208.1|	0.293	0.002	0.0067	0	gi|207091416|gb|ACI23377.1|	390.6	2e-107	putative HAD superfamily hydrolase [Elaeis guineensis]	Oryza sativa (indica cultivar-group) cDNA clone:OSIGCRA103P05, full insert sequence	--	gi|116637292|emb|CT828448.1|	117	2e-23	Oryza sativa (indica cultivar-group) cDNA clone:OSIGCRA103P05, full insert sequence	--	--	--	--	GO:0008152//metabolic process;GO:0007020//microtubule nucleation	GO:0016787//hydrolase activity	GO:0005829//cytosol;GO:0005739//mitochondrion
gi|532762629|gb|GAHT01055638.1|	Secondary metabolism	CL14108.Contig2_All	0.2987	0.03	0.1005	0.371311	gi|532997584|gb|GAHU01086275.1|	0	0	0.0149	0	gi|356548445|ref|XP_003542612.1|	489.2	5e-137	PREDICTED: abhydrolase domain-containing protein FAM108C1-like [Glycine max]	Vitis vinifera clone SS0ABG81YH15	--	gi|349721401|emb|FQ381852.1|	242	7e-61	Vitis vinifera clone SS0ABG81YH15	--	--	--	--	GO:0010089//xylem development;GO:0009860//pollen tube growth;GO:0010382//cellular cell wall macromolecule metabolic process	GO:0016787//hydrolase activity	GO:0005576//extracellular region
gi|532810954|gb|GAHT01009970.1|	Transcription Factor	CL14042.Contig1_All	0.2401	0.0211	0.0877	0.381508	gi|533091147|gb|GAHU01017819.1|	0	0	0.0104	0	gi|295913528|gb|ADG58012.1|	439.1	7e-122	transcription factor [Lycoris longituba]	Malus x domestica HD domain class transcription factor (HD19) mRNA, complete cds	Homeobox-leucine zipper protein HOX21 OS=Oryza sativa subsp. indica GN=HOX21 PE=2 SV=2	gi|302398840|gb|HM122576.1|	151	2e-33	Malus x domestica HD domain class transcription factor (HD19) mRNA, complete cds	sp|A2XD08|HOX21_ORYSI	326	2e-89	Homeobox-leucine zipper protein HOX21 OS=Oryza sativa subsp. indica GN=HOX21 PE=2 SV=2	GO:0006355//regulation of transcription, DNA-dependent	GO:0003700//sequence-specific DNA binding transcription factor activity;GO:0000976//transcription regulatory region sequence-specific DNA binding	GO:0005634//nucleus
gi|532815896|gb|GAHT01005028.1|	Secondary metabolism	CL17785.Contig1_All	0.0386	0.0012	0.0319	0.3854	gi|533093841|gb|GAHU01015125.1|	0	0	0.0238	0	gi|224120122|ref|XP_002318247.1|	632.9	3e-180	predicted protein [Populus trichocarpa] >gi|222858920|gb|EEE96467.1| predicted protein [Populus trichocarpa]	PREDICTED: Vitis vinifera L-idonate 5-dehydrogenase-like (LOC100265888), mRNA	L-idonate 5-dehydrogenase OS=Vitis vinifera GN=VIT_16s0100g00290 PE=1 SV=2	gi|359490366|ref|XM_002269859.2|	202	6e-49	PREDICTED: Vitis vinifera L-idonate 5-dehydrogenase-like (LOC100265888), mRNA	sp|Q1PSI9|IDND_VITVI	573	6e-164	L-idonate 5-dehydrogenase OS=Vitis vinifera GN=VIT_16s0100g00290 PE=1 SV=2	GO:0055114//oxidation-reduction process	GO:0003939//L-iditol 2-dehydrogenase activity;GO:0000166//nucleotide binding;GO:0008270//zinc ion binding	GO:0005829//cytosol;GO:0009506//plasmodesma
gi|532819543|gb|GAHT01001381.1|	Primary Metabolism	CL14026.Contig2_All	0	0.0136	0	0.400027	gi|533107211|gb|GAHU01001755.1|	0	0	0	0	gi|255548455|ref|XP_002515284.1|	152.1	3e-36	conserved hypothetical protein [Ricinus communis] >gi|223545764|gb|EEF47268.1| conserved hypothetical protein [Ricinus communis]	PREDICTED: Brachypodium distachyon calvin cycle protein CP12-like (LOC100830724), mRNA	Calvin cycle protein CP12-2, chloroplastic OS=Arabidopsis thaliana GN=CP12-2 PE=1 SV=1	gi|357131923|ref|XM_003567535.1|	133	2e-28	PREDICTED: Brachypodium distachyon calvin cycle protein CP12-like (LOC100830724), mRNA	sp|Q9LZP9|CP122_ARATH	117	5e-27	Calvin cycle protein CP12-2, chloroplastic OS=Arabidopsis thaliana GN=CP12-2 PE=1 SV=1	GO:0050896//response to stimulus	-	GO:0009536//plastid
gi|532800661|gb|GAHT01018941.1|	Secondary metabolism	CL10749.Contig2_All	0.1741	0.01	0.0576	0.417639	gi|533092870|gb|GAHU01016096.1|	0	0	0.0076	0	gi|226509226|ref|NP_001149310.1|	564.3	1e-159	spermidine synthase 1 [Zea mays] >gi|195626288|gb|ACG34974.1| spermidine synthase 1 [Zea mays]	Elaeis oleifera spermidine synthase I (SpeE) mRNA, partial cds	Spermine synthase OS=Arabidopsis thaliana GN=SPMS PE=1 SV=1	gi|226441628|gb|FJ789769.1|	448	1e-123	Elaeis oleifera spermidine synthase I (SpeE) mRNA, partial cds	sp|Q94BN2|SPSY_ARATH	520	7e-148	Spermine synthase OS=Arabidopsis thaliana GN=SPMS PE=1 SV=1	GO:0032259//methylation;GO:0008295//spermidine biosynthetic process	GO:0030750;GO:0004766//spermidine synthase activity;GO:0016768//spermine synthase activity	-
gi|532815523|gb|GAHT01005401.1|	Transporter	CL2136.Contig2_All	0.1066	0.0032	0.0299	0.420476	gi|533098296|gb|GAHU01010670.1|	0.3339	0.0171	0.0512	0	gi|357132105|ref|XP_003567673.1|	2008	0	PREDICTED: ABC transporter C family member 4-like [Brachypodium distachyon]	PREDICTED: Vitis vinifera ABC transporter C family member 4-like (LOC100253698), mRNA	ABC transporter C family member 14 OS=Arabidopsis thaliana GN=ABCC14 PE=1 SV=1	gi|225437335|ref|XM_002264976.1|	270	1e-68	PREDICTED: Vitis vinifera ABC transporter C family member 4-like (LOC100253698), mRNA	sp|Q9LZJ5|AB14C_ARATH	1934	0	ABC transporter C family member 14 OS=Arabidopsis thaliana GN=ABCC14 PE=1 SV=1	GO:0009611//response to wounding;GO:0009414//response to water deprivation;GO:0010118//stomatal movement;GO:0009624//response to nematode;GO:0006855//drug transmembrane transport;GO:0034976//response to endoplasmic reticulum stress;GO:0055114//oxidation-reduction process;GO:0006200//ATP catabolic process;GO:0009627//systemic acquired resistance	GO:0032440//2-alkenal reductase [NAD(P)] activity;GO:0008517//folic acid transporter activity;GO:0042626//ATPase activity, coupled to transmembrane movement of substances;GO:0005524//ATP binding	GO:0000325//plant-type vacuole;GO:0005774//vacuolar membrane;GO:0009536//plastid;GO:0016021//integral to membrane;GO:0005794//Golgi apparatus;GO:0009506//plasmodesma;GO:0005886//plasma membrane
gi|532759347|gb|GAHT01058025.1|	Unclassified	CL4239.Contig2_All	0.4139	0.0262	0.0634	0.451507	gi|532983335|gb|GAHU01093588.1|	0.2071	0.0552	0.2664	0	gi|225448526|ref|XP_002276361.1|	242.3	9e-63	PREDICTED: uncharacterized protein At5g39865 [Vitis vinifera]	PREDICTED: Glycine max uncharacterized protein LOC100807688 (LOC100807688), mRNA	Uncharacterized protein At5g39865 OS=Arabidopsis thaliana GN=At5g39865 PE=1 SV=1	gi|356538000|ref|XM_003537446.1|	89.7	5e-15	PREDICTED: Glycine max uncharacterized protein LOC100807688 (LOC100807688), mRNA	sp|Q9FLE8|Y5986_ARATH	142	4e-34	Uncharacterized protein At5g39865 OS=Arabidopsis thaliana GN=At5g39865 PE=1 SV=1	GO:0045454//cell redox homeostasis	GO:0009055//electron carrier activity;GO:0015035//protein disulfide oxidoreductase activity	-
gi|532803485|gb|GAHT01016117.1|	Unclassified	CL4734.Contig2_All	0.1471	0.0141	0.0957	0.475523	gi|533092530|gb|GAHU01016436.1|	0	0	0.0226	0	gi|388505390|gb|AFK40761.1|	249.6	4e-65	unknown [Lotus japonicus]	Gymnadenia conopsea expressed DUF149 protein-like mRNA, complete sequence	--	gi|117654409|gb|EF051318.1|	238	8e-60	Gymnadenia conopsea expressed DUF149 protein-like mRNA, complete sequence	--	--	--	--	GO:0019243//methylglyoxal catabolic process to D-lactate	-	GO:0009941//chloroplast envelope;GO:0009570//chloroplast stroma;GO:0009535//chloroplast thylakoid membrane
gi|532795760|gb|GAHT01023163.1|	Cell growth/division	CL9922.Contig1_All	0.1377	0.0073	0.0527	0.497858	gi|533068142|gb|GAHU01040824.1|	0.0981	0.0013	0.0134	0	gi|115436440|ref|NP_001042978.1|	556.6	3e-157	Os01g0349400 [Oryza sativa Japonica Group] >gi|113532509|dbj|BAF04892.1| Os01g0349400 [Oryza sativa Japonica Group]	PREDICTED: Brachypodium distachyon serine/threonine-protein phosphatase PP1 isozyme 9-like (LOC100841528), mRNA	Serine/threonine-protein phosphatase PP1 isozyme 8 OS=Arabidopsis thaliana GN=TOPP8 PE=2 SV=3	gi|357134590|ref|XM_003568852.1|	373	1e-100	PREDICTED: Brachypodium distachyon serine/threonine-protein phosphatase PP1 isozyme 9-like (LOC100841528), mRNA	sp|O82734|PP18_ARATH	518	5e-147	Serine/threonine-protein phosphatase PP1 isozyme 8 OS=Arabidopsis thaliana GN=TOPP8 PE=2 SV=3	GO:0035556//intracellular signal transduction;GO:0030968//endoplasmic reticulum unfolded protein response;GO:0010200//response to chitin;GO:0006470//protein dephosphorylation;GO:0009738//abscisic acid mediated signaling pathway	GO:0004722//protein serine/threonine phosphatase activity	GO:0005737//cytoplasm
gi|532777735|gb|GAHT01040532.1|	Cell growth/division	CL4842.Contig2_All	0	0.0057	0	0.50869	gi|533077509|gb|GAHU01031457.1|	0.0924	0.0018	0.0198	0	gi|356555482|ref|XP_003546060.1|	331.3	1e-89	PREDICTED: eukaryotic translation initiation factor 4E-1-like [Glycine max]	Zea mays uncharacterized LOC100381286 (LOC100381286), mRNA >gi|194708501|gb|BT043330.1| Zea mays full-length cDNA clone ZM_BFc0159I06 mRNA, complete cds	Eukaryotic translation initiation factor 4E-1 OS=Oryza sativa subsp. japonica GN=Os01g0970400 PE=2 SV=1	gi|293332620|ref|NM_001174185.1|	119	5e-24	Zea mays uncharacterized LOC100381286 (LOC100381286), mRNA >gi|194708501|gb|BT043330.1| Zea mays full-length cDNA clone ZM_BFc0159I06 mRNA, complete cds	sp|P48599|IF4E1_ORYSJ	326	9e-90	Eukaryotic translation initiation factor 4E-1 OS=Oryza sativa subsp. japonica GN=Os01g0970400 PE=2 SV=1	GO:0006413//translational initiation	GO:0003743//translation initiation factor activity	GO:0005737//cytoplasm;GO:0005634//nucleus
gi|532763130|gb|GAHT01055137.1|	Transporter	CL10952.Contig1_All	0.0547	0.0111	0.2023	0.521638	gi|533039695|gb|GAHU01065762.1|	0	0	0.0049	0	gi|357137521|ref|XP_003570349.1|	489.2	5e-137	PREDICTED: ABC transporter I family member 19-like [Brachypodium distachyon]	Phyllostachys edulis cDNA clone: bphylf048g15, full insert sequence	ABC transporter I family member 19 OS=Arabidopsis thaliana GN=ABCI19 PE=2 SV=1	gi|242374941|emb|FP095902.1|	369	5e-99	Phyllostachys edulis cDNA clone: bphylf048g15, full insert sequence	sp|Q3EDJ0|AB19I_ARATH	456	2e-128	ABC transporter I family member 19 OS=Arabidopsis thaliana GN=ABCI19 PE=2 SV=1	GO:0048767//root hair elongation;GO:0044272//sulfur compound biosynthetic process;GO:0009108//coenzyme biosynthetic process;GO:0009793//embryo development ending in seed dormancy;GO:0008652//cellular amino acid biosynthetic process;GO:0009695//jasmonic acid biosynthetic process;GO:0000271//polysaccharide biosynthetic process;GO:0043481//anthocyanin accumulation in tissues in response to UV light;…	GO:0016747//transferase activity, transferring acyl groups other than amino-acyl groups;GO:0005215//transporter activity;GO:0004526//ribonuclease P activity;GO:0005524//ATP binding;GO:0016887//ATPase activity	GO:0005783//endoplasmic reticulum;GO:0005886//plasma membrane;GO:0005634//nucleus
gi|532814492|gb|GAHT01006432.1|	Unclassified	CL10938.Contig2_All	0.1369	0.0117	0.0854	0.536341	gi|533100076|gb|GAHU01008890.1|	0.2868	0.0011	0.0037	0	gi|359479803|ref|XP_002276883.2|	634.4	1e-180	PREDICTED: protein IWS1 homolog [Vitis vinifera] >gi|296086725|emb|CBI32360.3| unnamed protein product [Vitis vinifera]	PREDICTED: Vitis vinifera protein IWS1 homolog (LOC100249381), mRNA	--	gi|359479802|ref|XM_002276847.2|	147	5e-32	PREDICTED: Vitis vinifera protein IWS1 homolog (LOC100249381), mRNA	--	--	--	--	GO:0009697//salicylic acid biosynthetic process;GO:0006944//cellular membrane fusion;GO:0006623//protein targeting to vacuole;GO:0032784//regulation of DNA-dependent transcription, elongation;GO:0006487//protein N-linked glycosylation;GO:0048193//Golgi vesicle transport;GO:0009742//brassinosteroid mediated signaling pathway;GO:0009627//systemic acquired resistance	GO:0003677//DNA binding	GO:0005634//nucleus
gi|532781191|gb|GAHT01037076.1|	Cell growth/division	CL11977.Contig2_All	0	0.0051	0	0.559368	gi|533072178|gb|GAHU01036788.1|	0.1627	0.0021	0.0127	0	gi|122178461|sp|Q1EPG7.1|CSPL1_MUSAC	117.9	8e-26	RecName: Full=CASP-like protein MA4_106O17.50	--	CASP-like protein MA4_106O17.50 OS=Musa acuminata GN=MA4_106O17.50 PE=2 SV=1	--	--	--	--	sp|Q1EPG7|CSPL1_MUSAC	117	3e-27	CASP-like protein MA4_106O17.50 OS=Musa acuminata GN=MA4_106O17.50 PE=2 SV=1	-	GO:0005515//protein binding	GO:0016020//membrane;GO:0044464//cell part
gi|532753263|gb|GAHT01064107.1|	Protein Destination and Storage	CL16289.Contig2_All	0	0.0039	0	0.593044	gi|533003353|gb|GAHU01083281.1|	0.5758	0.0024	0.0042	0	gi|302143834|emb|CBI22695.3|	376.3	5e-103	unnamed protein product [Vitis vinifera]	PREDICTED: Vitis vinifera SKP1-like protein 21-like (LOC100247347), mRNA	SKP1-like protein 21 OS=Arabidopsis thaliana GN=ASK21 PE=2 SV=1	gi|359490496|ref|XM_002269685.2|	228	1e-56	PREDICTED: Vitis vinifera SKP1-like protein 21-like (LOC100247347), mRNA	sp|Q8LF97|ASK21_ARATH	362	3e-100	SKP1-like protein 21 OS=Arabidopsis thaliana GN=ASK21 PE=2 SV=1	GO:0006511//ubiquitin-dependent protein catabolic process	GO:0004842//ubiquitin-protein ligase activity	GO:0005634//nucleus;GO:0019005//SCF ubiquitin ligase complex
gi|532814943|gb|GAHT01005981.1|	Signal Transdcution	Unigene19592_All	0.2865	0.0029	0.0102	0.594329	gi|533084488|gb|GAHU01024478.1|	0	0	0	0	gi|359474367|ref|XP_003631445.1|	125.9	9e-28	PREDICTED: uncharacterized protein LOC100266073 isoform 2 [Vitis vinifera]	Oryza sativa Japonica Group Os10g0507500 (Os10g0507500) mRNA, complete cds	Proline-rich receptor-like protein kinase PERK8 OS=Arabidopsis thaliana GN=PERK8 PE=1 SV=1	gi|115482845|ref|NM_001071551.1|	81.8	1e-12	Oryza sativa Japonica Group Os10g0507500 (Os10g0507500) mRNA, complete cds	sp|Q9FFW5|PERK8_ARATH	73.6	2e-13	Proline-rich receptor-like protein kinase PERK8 OS=Arabidopsis thaliana GN=PERK8 PE=1 SV=1	-	-	-
gi|532792617|gb|GAHT01025650.1|	Protein Synthesis	CL5565.Contig1_All	0.7112	0.012	0.0169	0.594783	gi|533078621|gb|GAHU01030345.1|	0	0	0	0	gi|225448154|ref|XP_002264418.1|	313.9	1e-84	PREDICTED: nifU-like protein 2, chloroplastic [Vitis vinifera] >gi|297739542|emb|CBI29724.3| unnamed protein product [Vitis vinifera]	PREDICTED: Vitis vinifera nifU-like protein 2, chloroplastic (LOC100254178), mRNA	NifU-like protein 2, chloroplastic OS=Arabidopsis thaliana GN=NIFU2 PE=1 SV=1	gi|359486165|ref|XM_002264382.2|	260	2e-66	PREDICTED: Vitis vinifera nifU-like protein 2, chloroplastic (LOC100254178), mRNA	sp|Q93W20|NIFU2_ARATH	285	2e-77	NifU-like protein 2, chloroplastic OS=Arabidopsis thaliana GN=NIFU2 PE=1 SV=1	GO:0016226//iron-sulfur cluster assembly;GO:0009658//chloroplast organization	GO:0051536//iron-sulfur cluster binding;GO:0005506//iron ion binding;GO:0005198//structural molecule activity	GO:0009570//chloroplast stroma
gi|532791633|gb|GAHT01026634.1|	Energy	Unigene28691_All	0.3856	0.0378	0.098	0.610571	gi|533061950|gb|GAHU01047016.1|	0.3698	0.012	0.0324	0	gi|225437969|ref|XP_002271666.1|	241.5	7e-63	PREDICTED: photosystem II reaction center PSB28 protein, chloroplastic [Vitis vinifera] >gi|297744226|emb|CBI37196.3| unnamed protein product [Vitis vinifera]	PREDICTED: Vitis vinifera photosystem II reaction center PSB28 protein, chloroplastic-like (LOC100260011), mRNA	Photosystem II reaction center PSB28 protein, chloroplastic OS=Oryza sativa subsp. japonica GN=PSB28 PE=2 SV=2	gi|359480319|ref|XM_002271630.2|	129	4e-27	PREDICTED: Vitis vinifera photosystem II reaction center PSB28 protein, chloroplastic-like (LOC100260011), mRNA	sp|Q0JG75|PSB28_ORYSJ	231	2e-61	Photosystem II reaction center PSB28 protein, chloroplastic OS=Oryza sativa subsp. japonica GN=PSB28 PE=2 SV=2	GO:0000038//very long-chain fatty acid metabolic process;GO:0006655//phosphatidylglycerol biosynthetic process;GO:0042335//cuticle development;GO:0019288//isopentenyl diphosphate biosynthetic process, mevalonate-independent pathway;GO:0010207//photosystem II assembly	-	GO:0009539//photosystem II reaction center;GO:0009535//chloroplast thylakoid membrane;GO:0009570//chloroplast stroma;GO:0009654//oxygen evolving complex
gi|532816971|gb|GAHT01003953.1|	Energy	CL9750.Contig2_All	0	0.0019	0	0.633223	gi|533107842|gb|GAHU01001124.1|	0	0	0	0	gi|192910830|gb|ACF06523.1|	368.2	1e-100	vacuolar ATP synthase subunit E [Elaeis guineensis]	Zea mays full-length cDNA clone ZM_BFb0348I10 mRNA, complete cds	V-type proton ATPase subunit E OS=Citrus limon GN=VATE PE=2 SV=1	gi|223946836|gb|BT062805.1|	218	1e-53	Zea mays full-length cDNA clone ZM_BFb0348I10 mRNA, complete cds	sp|Q9SWE7|VATE_CITLI	357	1e-98	V-type proton ATPase subunit E OS=Citrus limon GN=VATE PE=2 SV=1	GO:0006833//water transport;GO:0009793//embryo development ending in seed dormancy;GO:0006816//calcium ion transport;GO:0009651//response to salt stress;GO:0015991//ATP hydrolysis coupled proton transport;GO:0007033//vacuole organization;GO:0042742//defense response to bacterium;GO:0006972//hyperosmotic response;GO:0007030//Golgi organization;GO:0042777//plasma membrane ATP synthesis coupled prot…	GO:0046961//proton-transporting ATPase activity, rotational mechanism;GO:0046933//hydrogen ion transporting ATP synthase activity, rotational mechanism;GO:0005524//ATP binding	GO:0009705//plant-type vacuole membrane;GO:0033178//proton-transporting two-sector ATPase complex, catalytic domain;GO:0022626//cytosolic ribosome;GO:0005794//Golgi apparatus;GO:0005753//mitochondrial proton-transporting ATP synthase complex;GO:0005886//plasma membrane
gi|532786170|gb|GAHT01032097.1|	Unclassified	CL2965.Contig3_All	0.1025	0.0923	0.9011	0.638451	gi|533065007|gb|GAHU01043959.1|	0	0	0.0071	0	gi|302142732|emb|CBI19935.3|	370.9	2e-101	unnamed protein product [Vitis vinifera]	PREDICTED: Vitis vinifera ras-related protein RABC1-like (LOC100266035), mRNA	Ras-related protein RABC1 OS=Arabidopsis thaliana GN=RABC1 PE=2 SV=1	gi|359492295|ref|XM_003634348.1|	381	1e-102	PREDICTED: Vitis vinifera ras-related protein RABC1-like (LOC100266035), mRNA	sp|O23657|RABC1_ARATH	355	3e-98	Ras-related protein RABC1 OS=Arabidopsis thaliana GN=RABC1 PE=2 SV=1	GO:0006470//protein dephosphorylation;GO:0009414//response to water deprivation;GO:0007264//small GTPase mediated signal transduction;GO:0009737//response to abscisic acid stimulus;GO:0009631//cold acclimation;GO:0009961//response to 1-aminocyclopropane-1-carboxylic acid;GO:0015031//protein transport	GO:0046872//metal ion binding;GO:0004767//sphingomyelin phosphodiesterase activity;GO:0004722//protein serine/threonine phosphatase activity;GO:0005525//GTP binding	GO:0008287//protein serine/threonine phosphatase complex;GO:0005886//plasma membrane
gi|532799372|gb|GAHT01020230.1|	Protein Destination and Storage	Unigene3542_All	0	0.0012	0	0.646583	gi|533097179|gb|GAHU01011787.1|	0	0	0	0	gi|225457759|ref|XP_002263592.1|	971.5	0	PREDICTED: vacuolar protein sorting-associated protein 45 homolog [Vitis vinifera] >gi|302142769|emb|CBI19972.3| unnamed protein product [Vitis vinifera]	PREDICTED: Vitis vinifera vacuolar protein sorting-associated protein 45 homolog-like (LOC100243832), mRNA	Vacuolar protein sorting-associated protein 45 homolog OS=Arabidopsis thaliana GN=VPS45 PE=1 SV=2	gi|359492314|ref|XM_002263556.2|	567	1e-158	PREDICTED: Vitis vinifera vacuolar protein sorting-associated protein 45 homolog-like (LOC100243832), mRNA	sp|O49048|VPS45_ARATH	914	0	Vacuolar protein sorting-associated protein 45 homolog OS=Arabidopsis thaliana GN=VPS45 PE=1 SV=2	GO:0010363//regulation of plant-type hypersensitive response;GO:0009306//protein secretion;GO:0015802//basic amino acid transport;GO:0006882//cellular zinc ion homeostasis;GO:0006623//protein targeting to vacuole;GO:0015696//ammonium transport;GO:0043090//amino acid import;GO:0006820//anion transport;GO:0006862//nucleotide transport;GO:0006612//protein targeting to membrane;GO:0006944//cellular m…	GO:0008565//protein transporter activity;GO:0005515//protein binding	GO:0009705//plant-type vacuole membrane;GO:0005802//trans-Golgi network;GO:0005794//Golgi apparatus
gi|532780254|gb|GAHT01038013.1|	Unclassified	CL4350.Contig2_All	0.2165	0.0038	0.0176	0.651724	gi|533072887|gb|GAHU01036079.1|	0	0	0.0058	0	gi|351720818|ref|NP_001236933.1|	344.7	1e-93	uncharacterized protein LOC100500109 [Glycine max]	Phyllostachys edulis cDNA clone: bphyem116g09, full insert sequence	--	gi|242380332|emb|FP101663.1|	180	2e-42	Phyllostachys edulis cDNA clone: bphyem116g09, full insert sequence	--	--	--	--	GO:0043043//peptide biosynthetic process;GO:0016226//iron-sulfur cluster assembly;GO:0006414//translational elongation;GO:0045036//protein targeting to chloroplast;GO:0009793//embryo development ending in seed dormancy	GO:0003746//translation elongation factor activity	GO:0005739//mitochondrion;GO:0009570//chloroplast stroma
gi|532745853|gb|GAHT01071517.1|	Unclassified	Unigene64449_All	0	0.0023	0	0.65502	gi|533005809|gb|GAHU01081928.1|	0.1577	0.0023	0.0144	0	gi|297608315|ref|NP_001061429.2|	314.3	1e-84	Os08g0274700 [Oryza sativa Japonica Group] >gi|255678312|dbj|BAF23343.2| Os08g0274700, partial [Oryza sativa Japonica Group]	Phyllostachys edulis cDNA clone: bphylf027i10, full insert sequence	--	gi|242382137|emb|FP091577.1|	119	4e-24	Phyllostachys edulis cDNA clone: bphylf027i10, full insert sequence	--	--	--	--	GO:0006260//DNA replication;GO:0009793//embryo development ending in seed dormancy	-	GO:0005634//nucleus
gi|532796839|gb|GAHT01022763.1|	Unclassified	CL18799.Contig1_All	0.0313	0.0024	0.0755	0.675436	gi|533080370|gb|GAHU01028596.1|	0	0	0.0243	0	gi|225437649|ref|XP_002279089.1|	342	5e-93	PREDICTED: protein ECHIDNA [Vitis vinifera] >gi|297744023|emb|CBI36993.3| unnamed protein product [Vitis vinifera]	PREDICTED: Vitis vinifera protein ECHIDNA-like (LOC100260558), mRNA	Protein ECHIDNA OS=Arabidopsis thaliana GN=ECH PE=2 SV=1	gi|225437648|ref|XM_002279053.1|	276	3e-71	PREDICTED: Vitis vinifera protein ECHIDNA-like (LOC100260558), mRNA	sp|Q8LEK2|FA18_ARATH	322	2e-88	Protein ECHIDNA OS=Arabidopsis thaliana GN=ECH PE=2 SV=1	GO:0007030//Golgi organization;GO:0009826//unidimensional cell growth;GO:0009306//protein secretion	-	GO:0005768//endosome;GO:0005794//Golgi apparatus;GO:0016023//cytoplasmic membrane-bounded vesicle;GO:0016021//integral to membrane;GO:0005802//trans-Golgi network
gi|532801255|gb|GAHT01018347.1|	Signal Transdcution	CL2674.Contig7_All	0.2378	0.0482	0.2027	0.676863	gi|533068500|gb|GAHU01040466.1|	0.4982	0.0317	0.0635	0	gi|255578162|ref|XP_002529950.1|	526.9	2e-148	ATP binding protein, putative [Ricinus communis] >gi|223530548|gb|EEF32427.1| ATP binding protein, putative [Ricinus communis]	Oryza sativa Japonica Group Os02g0165100 (Os02g0165100) mRNA, complete cds	Probable LRR receptor-like serine/threonine-protein kinase At1g56130 OS=Arabidopsis thaliana GN=At1g56130 PE=1 SV=2	gi|115444430|ref|NM_001052530.1|	186	4e-44	Oryza sativa Japonica Group Os02g0165100 (Os02g0165100) mRNA, complete cds	sp|C0LGH2|Y1561_ARATH	336	2e-92	Probable LRR receptor-like serine/threonine-protein kinase At1g56130 OS=Arabidopsis thaliana GN=At1g56130 PE=1 SV=2	GO:0006468//protein phosphorylation	GO:0005524//ATP binding;GO:0004674//protein serine/threonine kinase activity	GO:0005739//mitochondrion
gi|532804488|gb|GAHT01015114.1|	Unclassified	CL222.Contig1_All	0	0.002	0	0.677748	gi|533088869|gb|GAHU01020097.1|	0.3416	0.0017	0.0051	0	gi|225446613|ref|XP_002280622.1|	326.6	3e-88	PREDICTED: uncharacterized protein LOC100243760 [Vitis vinifera] >gi|302143424|emb|CBI21985.3| unnamed protein product [Vitis vinifera]	Vitis vinifera clone SS0AEB24YI12	--	gi|349723781|emb|FQ388015.1|	99.6	6e-18	Vitis vinifera clone SS0AEB24YI12	--	--	--	--	GO:0019252//starch biosynthetic process;GO:0043085//positive regulation of catalytic activity;GO:0000023//maltose metabolic process	-	GO:0005886//plasma membrane
gi|532791583|gb|GAHT01026684.1|	Protein Destination and Storage	CL3281.Contig5_All	0.132	0.0041	0.031	0.680153	gi|533082832|gb|GAHU01026134.1|	0	0	0.0146	0	gi|225424568|ref|XP_002285370.1|	796.2	0	PREDICTED: actin-related protein 3 [Vitis vinifera]	PREDICTED: Vitis vinifera actin-related protein 3-like (LOC100259418), mRNA	Actin-related protein 3 OS=Oryza sativa subsp. japonica GN=ARP3 PE=2 SV=1	gi|359473129|ref|XM_002285334.2|	468	1e-128	PREDICTED: Vitis vinifera actin-related protein 3-like (LOC100259418), mRNA	sp|Q6K908|ARP3_ORYSJ	789	0	Actin-related protein 3 OS=Oryza sativa subsp. japonica GN=ARP3 PE=2 SV=1	GO:0009825//multidimensional cell growth;GO:0010090//trichome morphogenesis;GO:0045010//actin nucleation	GO:0005524//ATP binding;GO:0003779//actin binding;GO:0005200//structural constituent of cytoskeleton	GO:0005885//Arp2/3 protein complex;GO:0005829//cytosol
gi|532788316|gb|GAHT01029951.1|	Transcription	CL15705.Contig1_All	0	0.001	0	0.684652	gi|533063724|gb|GAHU01045242.1|	0.2922	0.0109	0.0373	0	gi|40538991|gb|AAR87248.1|	696	0	putative transcriptional adaptor [Oryza sativa Japonica Group] >gi|108711106|gb|ABF98901.1| transcriptional adaptor, putative, expressed [Oryza sativa Japonica Group] >gi|218193759|gb|EEC76186.1| hypothetical protein OsI_13524 [Oryza sativa Indica Group] >gi|222625804|gb|EEE59936.1| hypothetical protein OsJ_12585 [Oryza sativa Japonica Group]	Triticum aestivum cDNA, clone: WT003_E03, cultivar: Chinese Spring	Transcriptional adapter ADA2 OS=Oryza sativa subsp. japonica GN=ADA2 PE=2 SV=2	gi|241984886|dbj|AK332146.1|	262	9e-67	Triticum aestivum cDNA, clone: WT003_E03, cultivar: Chinese Spring	sp|Q75LL6|TADA2_ORYSJ	689	0	Transcriptional adapter ADA2 OS=Oryza sativa subsp. japonica GN=ADA2 PE=2 SV=2	GO:0042127//regulation of cell proliferation;GO:0009733//response to auxin stimulus;GO:0009735//response to cytokinin stimulus;GO:0009631//cold acclimation	GO:0003713//transcription coactivator activity;GO:0003677//DNA binding;GO:0016740//transferase activity;GO:0008270//zinc ion binding	GO:0005634//nucleus
gi|532782030|gb|GAHT01036237.1|	Unclassified	Unigene31550_All	0	0.0079	0	0.696872	gi|532951047|gb|GAHU01109694.1|	0	0	0	0	gi|224143151|ref|XP_002324862.1|	226.1	2e-58	predicted protein [Populus trichocarpa] >gi|222866296|gb|EEF03427.1| predicted protein [Populus trichocarpa]	PREDICTED: Glycine max uncharacterized LOC100806760 (LOC100806760), miscRNA	--	gi|356562988|ref|XR_137410.1|	107	1e-20	PREDICTED: Glycine max uncharacterized LOC100806760 (LOC100806760), miscRNA	--	--	--	--	GO:0006355//regulation of transcription, DNA-dependent	GO:0003712//transcription cofactor activity	GO:0005634//nucleus;GO:0005739//mitochondrion
gi|532765928|gb|GAHT01052339.1|	Transporter	CL1365.Contig2_All	0.1684	0.0318	0.1891	0.704837	gi|533050103|gb|GAHU01057463.1|	0.3283	0.0014	0.0042	0	gi|356531918|ref|XP_003534523.1|	477.6	2e-133	PREDICTED: protein TRIGALACTOSYLDIACYLGLYCEROL 3, chloroplastic-like [Glycine max]	Glycine max protein TRIGALACTOSYLDIACYLGLYCEROL 3, chloroplastic-like (LOC100783283), mRNA	Protein TRIGALACTOSYLDIACYLGLYCEROL 3, chloroplastic OS=Arabidopsis thaliana GN=TGD3 PE=1 SV=1	gi|363807171|ref|NM_001255674.1|	367	2e-98	Glycine max protein TRIGALACTOSYLDIACYLGLYCEROL 3, chloroplastic-like (LOC100783283), mRNA	sp|Q9AT00|AB13I_ARATH	471	6e-133	Protein TRIGALACTOSYLDIACYLGLYCEROL 3, chloroplastic OS=Arabidopsis thaliana GN=TGD3 PE=1 SV=1	GO:0006200//ATP catabolic process;GO:0006869//lipid transport	GO:0015419//sulfate transmembrane-transporting ATPase activity;GO:0005524//ATP binding	GO:0009507//chloroplast
gi|532793698|gb|GAHT01024569.1|	Cell growth/division	CL17361.Contig2_All	0.3018	0.0009	0.0031	0.721742	gi|533070492|gb|GAHU01038474.1|	0	0	0	0	gi|115456673|ref|NP_001051937.1|	476.9	4e-133	Os03g0854300 [Oryza sativa Japonica Group] >gi|29126350|gb|AAO66542.1| expressed protein [Oryza sativa Japonica Group] >gi|113550408|dbj|BAF13851.1| Os03g0854300 [Oryza sativa Japonica Group]	Zea mays full-length cDNA clone ZM_BFb0123J04 mRNA, complete cds	Nucleolin 1 OS=Arabidopsis thaliana GN=NUCL1 PE=1 SV=1	gi|224033656|gb|BT069007.1|	111	2e-21	Zea mays full-length cDNA clone ZM_BFb0123J04 mRNA, complete cds	sp|Q9FVQ1|NUCL1_ARATH	68.6	1e-11	Nucleolin 1 OS=Arabidopsis thaliana GN=NUCL1 PE=1 SV=1	GO:0006312//mitotic recombination;GO:0009560//embryo sac egg cell differentiation	GO:0003676//nucleic acid binding	-
gi|532769460|gb|GAHT01048807.1|	Transcription Factor	CL11479.Contig1_All	0.4271	0.0306	0.0716	0.756561	gi|533019429|gb|GAHU01075568.1|	0.7557	0.2053	0.2716	0	gi|296085143|emb|CBI28638.3|	273.1	8e-72	unnamed protein product [Vitis vinifera]	PREDICTED: Vitis vinifera transcription repressor KAN1-like (LOC100244905), mRNA	Transcription repressor KAN1 OS=Arabidopsis thaliana GN=KAN1 PE=1 SV=1	gi|359476520|ref|XM_002266427.2|	196	5e-47	PREDICTED: Vitis vinifera transcription repressor KAN1-like (LOC100244905), mRNA	sp|Q93WJ9|KAN1_ARATH	227	2e-59	Transcription repressor KAN1 OS=Arabidopsis thaliana GN=KAN1 PE=1 SV=1	GO:0048440//carpel development;GO:0009943//adaxial/abaxial axis specification	GO:0005488//binding	-
gi|532786161|gb|GAHT01032106.1|	Protein Destination and Storage	CL2638.Contig2_All	0.0759	0.0027	0.0355	0.759291	gi|533075422|gb|GAHU01033544.1|	0.1025	0.0013	0.013	0	gi|326520778|dbj|BAJ92752.1|	417.2	3e-115	predicted protein [Hordeum vulgare subsp. vulgare] >gi|326521378|dbj|BAJ96892.1| predicted protein [Hordeum vulgare subsp. vulgare]	Triticum aestivum cDNA, clone: SET4_E21, cultivar: Chinese Spring	E3 ubiquitin-protein ligase AIP2 OS=Arabidopsis thaliana GN=AIP2 PE=1 SV=1	gi|241989833|dbj|AK330374.1|	159	9e-36	Triticum aestivum cDNA, clone: SET4_E21, cultivar: Chinese Spring	sp|Q8RXD3|AIP2_ARATH	365	3e-101	E3 ubiquitin-protein ligase AIP2 OS=Arabidopsis thaliana GN=AIP2 PE=1 SV=1	GO:0009788//negative regulation of abscisic acid mediated signaling pathway;GO:0016567//protein ubiquitination;GO:0006865//amino acid transport	GO:0008270//zinc ion binding;GO:0004842//ubiquitin-protein ligase activity;GO:0005515//protein binding	GO:0005829//cytosol;GO:0005739//mitochondrion;GO:0005634//nucleus
gi|532806260|gb|GAHT01013342.1|	Cell growth/division	CL3409.Contig4_All	0.1628	0.0186	0.1145	0.77198	gi|533094702|gb|GAHU01014264.1|	0	0	0.0296	0	gi|296083732|emb|CBI23721.3|	336.6	6e-91	unnamed protein product [Vitis vinifera]	Populus trichocarpa clone POP004-I01, complete sequence	Nucleolin 1 OS=Oryza sativa subsp. japonica GN=Os08g0192900 PE=2 SV=1	gi|157743421|gb|AC211305.1|	69.9	8e-09	Populus trichocarpa clone POP004-I01, complete sequence	sp|Q6Z1C0|NUCL1_ORYSJ	69.7	5e-12	Nucleolin 1 OS=Oryza sativa subsp. japonica GN=Os08g0192900 PE=2 SV=1	-	-	-
gi|532761983|gb|GAHT01056189.1|	Protein Destination and Storage	CL12954.Contig1_All	0.3166	0.012	0.0378	0.773541	gi|533066396|gb|GAHU01042570.1|	0.392	0.0037	0.0094	0	gi|225461673|ref|XP_002285454.1|	597	2e-169	PREDICTED: peptide-N4-(N-acetyl-beta-glucosaminyl)asparagine amidase A-like [Vitis vinifera]	PREDICTED: Brachypodium distachyon peptide-N4-(N-acetyl-beta-glucosaminyl)asparagine amidase A-like (LOC100846493), mRNA	Peptide-N4-(N-acetyl-beta-glucosaminyl)asparagine amidase A OS=Prunus dulcis PE=1 SV=2	gi|357127629|ref|XM_003565434.1|	165	2e-37	PREDICTED: Brachypodium distachyon peptide-N4-(N-acetyl-beta-glucosaminyl)asparagine amidase A-like (LOC100846493), mRNA	sp|P81898|PNAA_PRUDU	590	7e-169	Peptide-N4-(N-acetyl-beta-glucosaminyl)asparagine amidase A OS=Prunus dulcis PE=1 SV=2	-	GO:0016787//hydrolase activity	GO:0005774//vacuolar membrane;GO:0009505//plant-type cell wall;GO:0005739//mitochondrion
gi|532819201|gb|GAHT01001723.1|	Unclassified	Unigene36472_All	0	0.005	0	0.775645	gi|532985980|gb|GAHU01092145.1|	0	0	0	0	gi|115479833|ref|NP_001063510.1|	133.3	9e-31	Os09g0483500 [Oryza sativa Japonica Group] >gi|113631743|dbj|BAF25424.1| Os09g0483500 [Oryza sativa Japonica Group]	Oryza sativa (indica cultivar-group) cDNA clone:OSIGCPI027J19, full insert sequence	--	gi|116634664|emb|CT833935.1|	58	5e-06	Oryza sativa (indica cultivar-group) cDNA clone:OSIGCPI027J19, full insert sequence	--	--	--	--	-	GO:0005509//calcium ion binding	-
gi|532755788|gb|GAHT01061582.1|	Primary Metabolism	CL1299.Contig5_All	0.177	0.066	0.3732	0.785588	gi|533000404|gb|GAHU01084880.1|	0.2467	0.0036	0.0147	0	gi|255585958|ref|XP_002533650.1|	708	0	1-phosphatidylinositol-4,5-bisphosphate phosphodiesterase, putative [Ricinus communis] >gi|223526463|gb|EEF28738.1| 1-phosphatidylinositol-4,5-bisphosphate phosphodiesterase, putative [Ricinus communis]	Lilium davidii phosphatidylinositol-specific phospholipase C 1 (PLC1) mRNA, partial cds	Phosphoinositide phospholipase C 6 OS=Arabidopsis thaliana GN=PLC6 PE=2 SV=2	gi|58759048|gb|AY735314.1|	246	6e-62	Lilium davidii phosphatidylinositol-specific phospholipase C 1 (PLC1) mRNA, partial cds	sp|Q8GV43|PLCD6_ARATH	636	0	Phosphoinositide phospholipase C 6 OS=Arabidopsis thaliana GN=PLC6 PE=2 SV=2	GO:0006629//lipid metabolic process;GO:0035556//intracellular signal transduction	GO:0004871//signal transducer activity;GO:0004435//phosphatidylinositol phospholipase C activity;GO:0005509//calcium ion binding	GO:0005622//intracellular;GO:0005886//plasma membrane
gi|532777963|gb|GAHT01040304.1|	Signal Transdcution	CL9045.Contig1_All	0.2191	0.0095	0.0434	0.789956	gi|533034800|gb|GAHU01068314.1|	0.1462	0.002	0.0134	0	gi|125540513|gb|EAY86908.1|	554.7	1e-156	hypothetical protein OsI_08291 [Oryza sativa Indica Group]	PREDICTED: Glycine max probable receptor-like protein kinase At5g47070-like (LOC100781858), mRNA	Probable receptor-like protein kinase At5g47070 OS=Arabidopsis thaliana GN=At5g47070 PE=1 SV=1	gi|356504530|ref|XM_003521001.1|	121	3e-24	PREDICTED: Glycine max probable receptor-like protein kinase At5g47070-like (LOC100781858), mRNA	sp|Q9LTC0|Y5707_ARATH	426	2e-119	Probable receptor-like protein kinase At5g47070 OS=Arabidopsis thaliana GN=At5g47070 PE=1 SV=1	GO:0006468//protein phosphorylation	GO:0005524//ATP binding;GO:0004674//protein serine/threonine kinase activity	GO:0005886//plasma membrane
gi|532809070|gb|GAHT01011438.1|	Transcription Factor	CL4269.Contig3_All	0.4422	0.0223	0.0503	0.803477	gi|533090265|gb|GAHU01018701.1|	0.507	0.0082	0.0162	0	gi|226502526|ref|NP_001151647.1|	295.8	5e-79	transcription factor PosF21 [Zea mays] >gi|195648356|gb|ACG43646.1| transcription factor PosF21 [Zea mays]	Zea mays transcription factor RF2b (LOC100285024), mRNA >gi|195646387|gb|EU970544.1| Zea mays clone 347108 transcription factor RF2b mRNA, complete cds	Transcription factor VIP1 OS=Arabidopsis thaliana GN=VIP1 PE=1 SV=1	gi|226494934|ref|NM_001157919.1|	121	1e-24	Zea mays transcription factor RF2b (LOC100285024), mRNA >gi|195646387|gb|EU970544.1| Zea mays clone 347108 transcription factor RF2b mRNA, complete cds	sp|Q9MA75|VIP1_ARATH	200	1e-51	Transcription factor VIP1 OS=Arabidopsis thaliana GN=VIP1 PE=1 SV=1	GO:0006355//regulation of transcription, DNA-dependent	GO:0003700//sequence-specific DNA binding transcription factor activity;GO:0043565//sequence-specific DNA binding;GO:0046983//protein dimerization activity	-
gi|532769656|gb|GAHT01048611.1|	Transporter	Unigene4149_All	0.084	0.0021	0.0254	0.809433	gi|532970385|gb|GAHU01100336.1|	0.064	0.0013	0.02	0	gi|225453883|ref|XP_002273090.1|	332.8	2e-90	PREDICTED: adenosine 3&apos;-phospho 5&apos;-phosphosulfate transporter 2 [Vitis vinifera] >gi|296089139|emb|CBI38842.3| unnamed protein product [Vitis vinifera]	PREDICTED: Vitis vinifera adenosine 3'-phospho 5'-phosphosulfate transporter 2-like (LOC100256411), mRNA	UDP-galactose/UDP-glucose transporter 4 OS=Arabidopsis thaliana GN=UTR4 PE=2 SV=1	gi|359474039|ref|XM_002282640.2|	172	3e-40	PREDICTED: Vitis vinifera adenosine 3'-phospho 5'-phosphosulfate transporter 2-like (LOC100256411), mRNA	sp|Q9LDX3|UTR4_ARATH	322	1e-88	UDP-galactose/UDP-glucose transporter 4 OS=Arabidopsis thaliana GN=UTR4 PE=2 SV=1	GO:0055085//transmembrane transport	-	GO:0005886//plasma membrane;GO:0016021//integral to membrane
gi|532798163|gb|GAHT01021439.1|	Unclassified	CL2276.Contig1_All	0.2058	0.0251	0.122	0.815637	gi|533067541|gb|GAHU01041425.1|	1.6637	0.0195	0.0117	0	gi|359480611|ref|XP_003632499.1|	783.9	0	PREDICTED: uncharacterized protein LOC100854050 [Vitis vinifera]	PREDICTED: Vitis vinifera uncharacterized LOC100854050 (LOC100854050), mRNA	--	gi|359480610|ref|XM_003632451.1|	178	1e-41	PREDICTED: Vitis vinifera uncharacterized LOC100854050 (LOC100854050), mRNA	--	--	--	--	GO:0005975//carbohydrate metabolic process	GO:0004553//hydrolase activity, hydrolyzing O-glycosyl compounds	GO:0005739//mitochondrion;GO:0005634//nucleus
gi|532806830|gb|GAHT01012772.1|	Secondary metabolism	Unigene109_All	0.241	0.0247	0.1026	0.819595	gi|533075844|gb|GAHU01033122.1|	0.1036	0.0008	0.0082	0	gi|225439570|ref|XP_002264939.1|	614.4	2e-174	PREDICTED: uncharacterized protein LOC100263765 [Vitis vinifera]	PREDICTED: Glycine max uncharacterized protein LOC100811015 (LOC100811015), mRNA	Peroxisomal 2,4-dienoyl-CoA reductase OS=Arabidopsis thaliana GN=At3g12800 PE=2 SV=1	gi|356495080|ref|XM_003516361.1|	137	5e-29	PREDICTED: Glycine max uncharacterized protein LOC100811015 (LOC100811015), mRNA	sp|Q9LTV6|DECR2_ARATH	57.8	3e-08	Peroxisomal 2,4-dienoyl-CoA reductase OS=Arabidopsis thaliana GN=At3g12800 PE=2 SV=1	GO:0006944//cellular membrane fusion;GO:0048193//Golgi vesicle transport;GO:0008152//metabolic process	-	GO:0005739//mitochondrion
gi|532758400|gb|GAHT01058972.1|	Transcription Factor	CL6393.Contig1_All	0.864	0.0041	0.0047	0.833026	gi|533020241|gb|GAHU01075099.1|	0.2127	0.004	0.0187	0	gi|359492901|ref|XP_002285733.2|	293.9	3e-78	PREDICTED: transcription factor bHLH96-like [Vitis vinifera] >gi|302142009|emb|CBI19212.3| unnamed protein product [Vitis vinifera]	PREDICTED: Glycine max transcription factor bHLH96-like (LOC100797856), mRNA	Transcription factor bHLH96 OS=Arabidopsis thaliana GN=BHLH96 PE=2 SV=1	gi|356552928|ref|XM_003544766.1|	143	5e-31	PREDICTED: Glycine max transcription factor bHLH96-like (LOC100797856), mRNA	sp|Q9C7T4|BH096_ARATH	234	1e-61	Transcription factor bHLH96 OS=Arabidopsis thaliana GN=BHLH96 PE=2 SV=1	-	-	GO:0005739//mitochondrion;GO:0005634//nucleus
gi|532801311|gb|GAHT01018291.1|	Signal Transdcution	Unigene35019_All	0.5501	0.0076	0.0138	0.840594	gi|533071031|gb|GAHU01037935.1|	0	0	0.0257	0	gi|224074263|ref|XP_002304327.1|	109	3e-23	calcium dependent protein kinase 16 [Populus trichocarpa] >gi|222841759|gb|EEE79306.1| calcium dependent protein kinase 16 [Populus trichocarpa]	Agrostis stolonifera microsatellite AsNJP378 sequence	Calcium-dependent protein kinase 16 OS=Arabidopsis thaliana GN=CPK16 PE=1 SV=1	gi|311705374|gb|HM440554.1|	58	9e-06	Agrostis stolonifera microsatellite AsNJP378 sequence	sp|Q7XJR9|CDPKG_ARATH	97.1	5e-21	Calcium-dependent protein kinase 16 OS=Arabidopsis thaliana GN=CPK16 PE=1 SV=1	-	GO:0004672//protein kinase activity	GO:0044464//cell part
gi|532783286|gb|GAHT01034981.1|	Unclassified	CL1366.Contig6_All	0.1837	0.0271	0.1473	0.842057	gi|533034643|gb|GAHU01068387.1|	0.0409	0.0014	0.034	0	gi|359486627|ref|XP_002278627.2|	355.5	1e-96	PREDICTED: uncharacterized protein LOC100263308 [Vitis vinifera] >gi|296086229|emb|CBI31670.3| unnamed protein product [Vitis vinifera]	Phyllostachys edulis cDNA clone: bphylf028o12, full insert sequence	--	gi|242386051|emb|FP098657.1|	67.9	2e-08	Phyllostachys edulis cDNA clone: bphylf028o12, full insert sequence	--	--	--	--	-	-	-
gi|532816549|gb|GAHT01004375.1|	Protein Synthesis	CL2751.Contig6_All	0.0249	0.0028	0.1141	0.855744	gi|533103940|gb|GAHU01005026.1|	0	0	0.0097	0	gi|296081217|emb|CBI18243.3|	303.9	1e-81	unnamed protein product [Vitis vinifera]	PREDICTED: Vitis vinifera 40S ribosomal protein S18-like (LOC100855135), mRNA	40S ribosomal protein S18 OS=Arabidopsis thaliana GN=RPS18A PE=1 SV=1	gi|359479620|ref|XM_003632255.1|	387	1e-104	PREDICTED: Vitis vinifera 40S ribosomal protein S18-like (LOC100855135), mRNA	sp|P34788|RS18_ARATH	298	2e-81	40S ribosomal protein S18 OS=Arabidopsis thaliana GN=RPS18A PE=1 SV=1	GO:0001510//RNA methylation;GO:0006412//translation;GO:0042254//ribosome biogenesis	GO:0003723//RNA binding;GO:0003735//structural constituent of ribosome;GO:0005515//protein binding	GO:0005618//cell wall;GO:0005730//nucleolus;GO:0009506//plasmodesma;GO:0022627//cytosolic small ribosomal subunit;GO:0005774//vacuolar membrane;GO:0005794//Golgi apparatus;GO:0005886//plasma membrane
gi|532804685|gb|GAHT01014917.1|	Protein Destination and Storage	CL9995.Contig1_All	0	0.0018	0	0.87146	gi|533096687|gb|GAHU01012279.1|	0	0	0.0123	0	gi|192910866|gb|ACF06541.1|	370.2	2e-101	glutathione S-transferase [Elaeis guineensis]	PREDICTED: Vitis vinifera protein IN2-1 homolog B-like (LOC100267329), mRNA	Protein IN2-1 homolog B OS=Oryza sativa subsp. japonica GN=GSTZ5 PE=2 SV=1	gi|359486315|ref|XM_002281539.2|	129	6e-27	PREDICTED: Vitis vinifera protein IN2-1 homolog B-like (LOC100267329), mRNA	sp|Q8H8U5|IN21B_ORYSJ	339	1e-93	Protein IN2-1 homolog B OS=Oryza sativa subsp. japonica GN=GSTZ5 PE=2 SV=1	GO:0046686//response to cadmium ion;GO:0010731//protein glutathionylation	GO:0004364//glutathione transferase activity	GO:0009570//chloroplast stroma
gi|532801272|gb|GAHT01018330.1|	Cell growth/division	CL12198.Contig3_All	0	0.0004	0	0.8808	gi|533065627|gb|GAHU01043339.1|	0	0	0.0101	0	gi|225450013|ref|XP_002272410.1|	1283.9	0	PREDICTED: structural maintenance of chromosomes protein 5 [Vitis vinifera] >gi|297736324|emb|CBI24962.3| unnamed protein product [Vitis vinifera]	PREDICTED: Vitis vinifera structural maintenance of chromosomes protein 5-like (LOC100249983), mRNA	Structural maintenance of chromosomes protein 2-1 OS=Arabidopsis thaliana GN=SMC2-1 PE=2 SV=2	gi|359487316|ref|XM_002272374.2|	198	2e-47	PREDICTED: Vitis vinifera structural maintenance of chromosomes protein 5-like (LOC100249983), mRNA	sp|Q9C5Y4|SMC21_ARATH	93.2	8e-19	Structural maintenance of chromosomes protein 2-1 OS=Arabidopsis thaliana GN=SMC2-1 PE=2 SV=2	GO:0035196//production of miRNAs involved in gene silencing by miRNA;GO:0010267//production of ta-siRNAs involved in RNA interference;GO:0007062//sister chromatid cohesion;GO:0051607//defense response to virus	GO:0005524//ATP binding	GO:0009506//plasmodesma;GO:0005634//nucleus
gi|532773041|gb|GAHT01045226.1|	Signal Transdcution	Unigene31348_All	0.4952	0.0051	0.0103	0.888539	gi|533059801|gb|GAHU01049165.1|	0.8428	0.0057	0.0068	0	gi|255560213|ref|XP_002521124.1|	827.4	0	serine/threonine protein kinase, putative [Ricinus communis] >gi|223539693|gb|EEF41275.1| serine/threonine protein kinase, putative [Ricinus communis]	PREDICTED: Vitis vinifera uncharacterized LOC100264925 (LOC100264925), mRNA	Serine/threonine-protein kinase CTR1 OS=Arabidopsis thaliana GN=CTR1 PE=1 SV=1	gi|359477845|ref|XM_003631984.1|	418	1e-113	PREDICTED: Vitis vinifera uncharacterized LOC100264925 (LOC100264925), mRNA	sp|Q05609|CTR1_ARATH	187	5e-47	Serine/threonine-protein kinase CTR1 OS=Arabidopsis thaliana GN=CTR1 PE=1 SV=1	GO:0006468//protein phosphorylation	GO:0004713//protein tyrosine kinase activity;GO:0004712//protein serine/threonine/tyrosine kinase activity;GO:0005524//ATP binding;GO:0004674//protein serine/threonine kinase activity	GO:0005886//plasma membrane;GO:0005829//cytosol
gi|532775550|gb|GAHT01042717.1|	Protein Destination and Storage	CL1764.Contig2_All	0.1757	0.0359	0.2041	0.89021	gi|533045037|gb|GAHU01062529.1|	0.742	0.0128	0.0173	0	gi|357117372|ref|XP_003560443.1|	287	2e-76	PREDICTED: uncharacterized protein LOC100846559 [Brachypodium distachyon]	Oryza sativa Japonica Group G1L2 mRNA for G1-like2 protein, complete cds, cultivar: Nipponbare	Formin-like protein 18 OS=Oryza sativa subsp. japonica GN=FH18 PE=2 SV=1	gi|270309079|dbj|AB512491.1|	426	1e-116	Oryza sativa Japonica Group G1L2 mRNA for G1-like2 protein, complete cds, cultivar: Nipponbare	sp|Q6MWG9|FH18_ORYSJ	54.7	8e-08	Formin-like protein 18 OS=Oryza sativa subsp. japonica GN=FH18 PE=2 SV=1	-	-	-
gi|532799169|gb|GAHT01020433.1|	Cell growth/division	CL17316.Contig1_All	0.1962	0.0052	0.0267	0.89773	gi|533098032|gb|GAHU01010934.1|	0	0	0.0111	0	gi|225435437|ref|XP_002285426.1|	226.1	2e-58	PREDICTED: heterogeneous nuclear ribonucleoprotein F-like [Vitis vinifera]	PREDICTED: Vitis vinifera heterogeneous nuclear ribonucleoprotein F-like (LOC100251936), mRNA	--	gi|225435436|ref|XM_002285390.1|	125	5e-26	PREDICTED: Vitis vinifera heterogeneous nuclear ribonucleoprotein F-like (LOC100251936), mRNA	--	--	--	--	-	GO:0003676//nucleic acid binding	GO:0044424//intracellular part
gi|532783763|gb|GAHT01034504.1|	Unclassified	CL7272.Contig2_All	1.1681	0.0024	0.002	0.903706	gi|533074906|gb|GAHU01034060.1|	0.8988	0.0153	0.017	0	gi|302142870|emb|CBI20165.3|	1208	0	unnamed protein product [Vitis vinifera]	PREDICTED: Vitis vinifera uncharacterized LOC100257153 (LOC100257153), mRNA	--	gi|359493592|ref|XM_002283352.2|	285	1e-73	PREDICTED: Vitis vinifera uncharacterized LOC100257153 (LOC100257153), mRNA	--	--	--	--	GO:0033259//plastid DNA replication;GO:0006302//double-strand break repair;GO:0006264//mitochondrial DNA replication	GO:0003887//DNA-directed DNA polymerase activity;GO:0003677//DNA binding;GO:0008408//3'-5' exonuclease activity	GO:0009295//nucleoid;GO:0005739//mitochondrion;GO:0009507//chloroplast;GO:0005634//nucleus
gi|532782895|gb|GAHT01035372.1|	Transcription Factor	CL11411.Contig1_All	1.4967	0.0075	0.005	0.905539	gi|533056107|gb|GAHU01052613.1|	0.7442	0.0077	0.0103	0	gi|307335624|gb|ADN43389.1|	582.4	4e-165	KNOX2 [Agave tequilana]	Agave tequilana KNOX2 mRNA, complete cds	Homeobox protein knotted-1-like 6 OS=Arabidopsis thaliana GN=KNAT6 PE=1 SV=1	gi|307335623|gb|GU980051.1|	1953	0	Agave tequilana KNOX2 mRNA, complete cds	sp|Q84JS6|KNAT6_ARATH	303	2e-82	Homeobox protein knotted-1-like 6 OS=Arabidopsis thaliana GN=KNAT6 PE=1 SV=1	-	GO:0003677//DNA binding	-
gi|532792820|gb|GAHT01025447.1|	Energy	CL7671.Contig2_All	0.0618	0.0153	0.248	0.916937	gi|533071372|gb|GAHU01037594.1|	0.1033	0.0019	0.0184	0	gi|356513991|ref|XP_003525691.1|	448	1e-124	PREDICTED: adenylate kinase B-like [Glycine max] >gi|356513993|ref|XP_003525692.1| PREDICTED: adenylate kinase B-like [Glycine max] >gi|255637862|gb|ACU19250.1| unknown [Glycine max]	Phyllostachys edulis cDNA clone: bphyem114b08, full insert sequence	Adenylate kinase B OS=Oryza sativa subsp. japonica GN=ADK-B PE=2 SV=1	gi|242383655|emb|FP092499.1|	460	1e-126	Phyllostachys edulis cDNA clone: bphyem114b08, full insert sequence	sp|Q08480|KAD2_ORYSJ	443	7e-125	Adenylate kinase B OS=Oryza sativa subsp. japonica GN=ADK-B PE=2 SV=1	GO:0046939//nucleotide phosphorylation;GO:0009165//nucleotide biosynthetic process;GO:0046686//response to cadmium ion;GO:0006163//purine nucleotide metabolic process	GO:0005507//copper ion binding;GO:0004017//adenylate kinase activity;GO:0005524//ATP binding;GO:0046899//nucleoside triphosphate adenylate kinase activity	GO:0005739//mitochondrion;GO:0005774//vacuolar membrane;GO:0005886//plasma membrane
gi|532764865|gb|GAHT01053402.1|	Primary Metabolism	CL12204.Contig2_All	0.1943	0.0016	0.0084	0.932676	gi|533075916|gb|GAHU01033050.1|	0.2932	0.0008	0.0028	0	gi|225434692|ref|XP_002280732.1|	1457.6	0	PREDICTED: alpha-glucan phosphorylase, H isozyme [Vitis vinifera] >gi|297745953|emb|CBI16009.3| unnamed protein product [Vitis vinifera]	PREDICTED: Vitis vinifera alpha-glucan phosphorylase, H isozyme-like (LOC100251865), mRNA	Alpha-glucan phosphorylase, H isozyme OS=Solanum tuberosum PE=1 SV=1	gi|225434691|ref|XM_002280696.1|	519	1e-144	PREDICTED: Vitis vinifera alpha-glucan phosphorylase, H isozyme-like (LOC100251865), mRNA	sp|P32811|PHSH_SOLTU	1427	0	Alpha-glucan phosphorylase, H isozyme OS=Solanum tuberosum PE=1 SV=1	GO:0009414//response to water deprivation;GO:0046686//response to cadmium ion;GO:0019252//starch biosynthetic process	GO:0004645//phosphorylase activity;GO:0030170//pyridoxal phosphate binding	GO:0009507//chloroplast;GO:0005829//cytosol
gi|532748883|gb|GAHT01068487.1|	Signal Transdcution	Unigene10988_All	0.3349	0.0017	0.0051	0.938387	gi|533017379|gb|GAHU01076488.1|	0.6583	0.0028	0.0043	0	gi|215704905|dbj|BAG94933.1|	368.6	5e-101	unnamed protein product [Oryza sativa Japonica Group]	Lotus japonicus cDNA, clone: LjFL1-003-DD01, HTC	Classical arabinogalactan protein 7 OS=Arabidopsis thaliana GN=AGP7 PE=1 SV=2	gi|292727818|dbj|AK336440.1|	125	7e-26	Lotus japonicus cDNA, clone: LjFL1-003-DD01, HTC	sp|Q8LG54|AGP7_ARATH	50.8	9e-07	Classical arabinogalactan protein 7 OS=Arabidopsis thaliana GN=AGP7 PE=1 SV=2	-	-	-
gi|532773675|gb|GAHT01044592.1|	Cell growth/division	CL17556.Contig1_All	0.1402	0.004	0.0284	0.93973	gi|533057710|gb|GAHU01051010.1|	0	0	0.014	0	gi|242075344|ref|XP_002447608.1|	205.3	7e-52	hypothetical protein SORBIDRAFT_06g006510 [Sorghum bicolor] >gi|241938791|gb|EES11936.1| hypothetical protein SORBIDRAFT_06g006510 [Sorghum bicolor]	PREDICTED: Brachypodium distachyon INO80 complex subunit C-like (LOC100844240), mRNA	--	gi|357167867|ref|XM_003581323.1|	103	3e-19	PREDICTED: Brachypodium distachyon INO80 complex subunit C-like (LOC100844240), mRNA	--	--	--	--	-	-	GO:0005634//nucleus
gi|532763213|gb|GAHT01055054.1|	Transcription Factor	CL12668.Contig1_All	0.3471	0.0544	0.1566	0.94837	gi|533054373|gb|GAHU01053979.1|	0	0	0.0111	0	gi|125551147|gb|EAY96856.1|	254.6	1e-66	hypothetical protein OsI_18777 [Oryza sativa Indica Group]	Solanum lycopersicum DNA, chromosome 8, clone: C08HBa0017M21, complete sequence	Transcription factor MYB1R1 OS=Solanum tuberosum PE=2 SV=1	gi|208609628|dbj|AP010894.1|	101	1e-18	Solanum lycopersicum DNA, chromosome 8, clone: C08HBa0017M21, complete sequence	sp|Q2V9B0|MY1R1_SOLTU	143	2e-34	Transcription factor MYB1R1 OS=Solanum tuberosum PE=2 SV=1	-	GO:0005488//binding	-
gi|532738716|gb|GAHT01078650.1|	Cell growth/division	Unigene51080_All	0.028	0.0009	0.0312	0.953938	gi|533020158|gb|GAHU01075170.1|	0.0743	0.0012	0.0165	0	gi|125541616|gb|EAY88011.1|	805.8	0	hypothetical protein OsI_09434 [Oryza sativa Indica Group]	PREDICTED: Brachypodium distachyon uncharacterized LOC100829273 (LOC100829273), mRNA	Vegetative cell wall protein gp1 OS=Chlamydomonas reinhardtii GN=GP1 PE=2 SV=1	gi|357123861|ref|XM_003563578.1|	99.6	9e-18	PREDICTED: Brachypodium distachyon uncharacterized LOC100829273 (LOC100829273), mRNA	sp|Q9FPQ6|GP1_CHLRE	63.5	5e-11	Vegetative cell wall protein gp1 OS=Chlamydomonas reinhardtii GN=GP1 PE=2 SV=1	GO:0010075//regulation of meristem growth	-	GO:0009506//plasmodesma;GO:0005618//cell wall;GO:0005634//nucleus;GO:0005783//endoplasmic reticulum;GO:0005739//mitochondrion
gi|532746237|gb|GAHT01071133.1|	Transcription	CL18904.Contig2_All	0.1283	0.005	0.039	0.95587	gi|533002140|gb|GAHU01083869.1|	0	0	0.0109	0	gi|326520341|dbj|BAK07429.1|	277.7	1e-73	predicted protein [Hordeum vulgare subsp. vulgare]	Hyacinthus orientalis single-stranded DNA-binding replication protein A (RPA) mRNA, partial cds	--	gi|47026871|gb|AY389564.1|	228	9e-57	Hyacinthus orientalis single-stranded DNA-binding replication protein A (RPA) mRNA, partial cds	--	--	--	--	-	-	GO:0009536//plastid
gi|532776827|gb|GAHT01041440.1|	Signal Transdcution	CL7155.Contig2_All	0.2911	0.0384	0.132	0.957976	gi|533057547|gb|GAHU01051173.1|	0.1741	0.0046	0.0267	0	gi|255559376|ref|XP_002520708.1|	290	6e-77	conserved hypothetical protein [Ricinus communis] >gi|223540093|gb|EEF41670.1| conserved hypothetical protein [Ricinus communis]	PREDICTED: Brachypodium distachyon uncharacterized LOC100829045 (LOC100829045), mRNA	Proline-rich receptor-like protein kinase PERK2 OS=Arabidopsis thaliana GN=PERK2 PE=2 SV=3	gi|357159644|ref|XM_003578465.1|	60	7e-06	PREDICTED: Brachypodium distachyon uncharacterized LOC100829045 (LOC100829045), mRNA	sp|Q9LK03|PERK2_ARATH	51.2	2e-06	Proline-rich receptor-like protein kinase PERK2 OS=Arabidopsis thaliana GN=PERK2 PE=2 SV=3	-	-	-
gi|532756788|gb|GAHT01060582.1|	Primary Metabolism	CL14395.Contig1_All	0.1931	0.0109	0.0565	0.96156	gi|533034528|gb|GAHU01068451.1|	0	0	0.0134	0	gi|225453590|ref|XP_002263621.1|	429.9	3e-119	PREDICTED: probable S-acyltransferase At4g00840 isoform 1 [Vitis vinifera] >gi|296088993|emb|CBI38696.3| unnamed protein product [Vitis vinifera]	Arabidopsis thaliana At4g00840 gene, complete cds	Probable S-acyltransferase At4g00840 OS=Arabidopsis thaliana GN=At4g00840 PE=2 SV=1	gi|57222209|gb|BT020511.1|	145	1e-31	Arabidopsis thaliana At4g00840 gene, complete cds	sp|Q5M757|ZDH15_ARATH	359	1e-99	Probable S-acyltransferase At4g00840 OS=Arabidopsis thaliana GN=At4g00840 PE=2 SV=1	-	GO:0008270//zinc ion binding	GO:0005576//extracellular region
gi|532789277|gb|GAHT01028990.1|	Unclassified	CL3181.Contig2_All	0.0935	0.0018	0.0197	0.965343	gi|533099506|gb|GAHU01009460.1|	0.0934	0.0018	0.0197	0	gi|242055941|ref|XP_002457116.1|	396.4	3e-109	hypothetical protein SORBIDRAFT_03g001570 [Sorghum bicolor] >gi|241929091|gb|EES02236.1| hypothetical protein SORBIDRAFT_03g001570 [Sorghum bicolor]	PREDICTED: Vitis vinifera protein CWC15 homolog A-like, transcript variant 2 (LOC100260003), mRNA	--	gi|359494219|ref|XM_002272417.2|	192	5e-46	PREDICTED: Vitis vinifera protein CWC15 homolog A-like, transcript variant 2 (LOC100260003), mRNA	--	--	--	--	GO:0000398//mRNA splicing, via spliceosome	-	GO:0005681//spliceosomal complex
gi|532803751|gb|GAHT01015851.1|	Transporter	CL3191.Contig4_All	0.0602	0.0139	0.2311	0.967822	gi|533105854|gb|GAHU01003112.1|	0.2391	0.036	0.1507	0	gi|301154095|emb|CBW30173.1|	1442.9	0	Plasma membrane ATPase 4 [Musa balbisiana]	PREDICTED: Vitis vinifera plasma membrane ATPase 4-like, transcript variant 1 (LOC100242786), mRNA	Plasma membrane ATPase OS=Oryza sativa subsp. japonica GN=Os04g0656100 PE=2 SV=1	gi|225446001|ref|XM_002267465.1|	1197	0	PREDICTED: Vitis vinifera plasma membrane ATPase 4-like, transcript variant 1 (LOC100242786), mRNA	sp|Q7XPY2|PMA1_ORYSJ	1392	0	Plasma membrane ATPase OS=Oryza sativa subsp. japonica GN=Os04g0656100 PE=2 SV=1	GO:0010119//regulation of stomatal movement;GO:0009414//response to water deprivation;GO:0006754//ATP biosynthetic process;GO:0006812//cation transport;GO:0009737//response to abscisic acid stimulus;GO:0006200//ATP catabolic process	GO:0008553//hydrogen-exporting ATPase activity, phosphorylative mechanism;GO:0046872//metal ion binding;GO:0005524//ATP binding	GO:0005773//vacuole;GO:0016021//integral to membrane;GO:0005886//plasma membrane;GO:0005634//nucleus
gi|532787396|gb|GAHT01030871.1|	Transcription Factor	CL16048.Contig5_All	0.0813	0.0017	0.0205	0.972278	gi|533072250|gb|GAHU01036716.1|	0.1297	0.0033	0.0257	0	gi|296090659|emb|CBI41059.3|	282.7	8e-75	unnamed protein product [Vitis vinifera]	Gossypium hirsutum homeodomain-leucine zipper protein HD4 (HB4) mRNA, complete cds	Homeobox-leucine zipper protein HOX19 OS=Oryza sativa subsp. japonica GN=HOX19 PE=2 SV=1	gi|307715375|gb|HM134793.1|	135	1e-28	Gossypium hirsutum homeodomain-leucine zipper protein HD4 (HB4) mRNA, complete cds	sp|Q8GRL4|HOX19_ORYSJ	257	1e-68	Homeobox-leucine zipper protein HOX19 OS=Oryza sativa subsp. japonica GN=HOX19 PE=2 SV=1	GO:0009735//response to cytokinin stimulus;GO:0006473//protein acetylation;GO:0006351//transcription, DNA-dependent	GO:0003677//DNA binding	-
gi|532816018|gb|GAHT01004906.1|	Transporter	CL16420.Contig2_All	0.0198	0.0012	0.0586	0.974912	gi|533103220|gb|GAHU01005746.1|	0	0	0.012	0	gi|218187320|gb|EEC69747.1|	699.1	0	hypothetical protein OsI_39279 [Oryza sativa Indica Group]	PREDICTED: Vitis vinifera HA11 H(+)-ATPase 11-like (LOC100241576), mRNA	ATPase 11, plasma membrane-type OS=Arabidopsis thaliana GN=AHA11 PE=1 SV=1	gi|359491750|ref|XM_002270308.2|	632	1e-178	PREDICTED: Vitis vinifera HA11 H(+)-ATPase 11-like (LOC100241576), mRNA	sp|Q9LV11|PMA11_ARATH	682	0	ATPase 11, plasma membrane-type OS=Arabidopsis thaliana GN=AHA11 PE=1 SV=1	GO:0009651//response to salt stress;GO:0006200//ATP catabolic process;GO:0006754//ATP biosynthetic process;GO:0006812//cation transport	GO:0008553//hydrogen-exporting ATPase activity, phosphorylative mechanism;GO:0046872//metal ion binding;GO:0005524//ATP binding	GO:0016021//integral to membrane;GO:0005886//plasma membrane
gi|532783767|gb|GAHT01034500.1|	Transcription Factor	Unigene42967_All	0	0	0.0305	0.975445	gi|533030587|gb|GAHU01070270.1|	0	0	0.0208	0	gi|225438432|ref|XP_002276608.1|	174.9	3e-43	PREDICTED: MLO9 protein [Vitis vinifera] >gi|296082569|emb|CBI21574.3| unnamed protein product [Vitis vinifera]	Navarretia involucrata voucher BRY:499 clone 1 MADS-box transcription factor PISTILLATA-like protein (PI) gene, partial cds	MLO-like protein 5 OS=Arabidopsis thaliana GN=MLO5 PE=2 SV=1	gi|381212673|gb|HQ911943.1|	60	2e-06	Navarretia involucrata voucher BRY:499 clone 1 MADS-box transcription factor PISTILLATA-like protein (PI) gene, partial cds	sp|O22815|MLO5_ARATH	144	2e-35	MLO-like protein 5 OS=Arabidopsis thaliana GN=MLO5 PE=2 SV=1	GO:0008219//cell death;GO:0010483//pollen tube reception	-	GO:0012505//endomembrane system;GO:0016021//integral to membrane;GO:0005737//cytoplasm
gi|532803538|gb|GAHT01016064.1|	Secondary metabolism	CL15422.Contig1_All	0.1354	0.0218	0.1613	0.981842	gi|533088130|gb|GAHU01020836.1|	0.064	0.0022	0.0351	0	gi|225451954|ref|XP_002283161.1|	227.6	1e-58	PREDICTED: probable transmembrane ascorbate ferrireductase 2 [Vitis vinifera]	Vitis vinifera clone SS0AEB25YG17	Probable transmembrane ascorbate ferrireductase 2 OS=Arabidopsis thaliana GN=CYB561B PE=2 SV=1	gi|349719951|emb|FQ387765.1|	125	6e-26	Vitis vinifera clone SS0AEB25YG17	sp|Q9SWS1|ACFR2_ARATH	215	1e-56	Probable transmembrane ascorbate ferrireductase 2 OS=Arabidopsis thaliana GN=CYB561B PE=2 SV=1	GO:0009744//response to sucrose stimulus;GO:0009749//response to glucose stimulus;GO:0009750//response to fructose stimulus	GO:0008805//carbon-monoxide oxygenase activity	GO:0005794//Golgi apparatus;GO:0016023//cytoplasmic membrane-bounded vesicle;GO:0016021//integral to membrane
gi|532815895|gb|GAHT01005029.1|	Protein Synthesis	CL12301.Contig1_All	0.0972	0.0017	0.0171	0.984045	gi|533100344|gb|GAHU01008622.1|	0	0	0.0228	0	gi|225439438|ref|XP_002266163.1|	480.3	2e-134	PREDICTED: ribosome biogenesis protein NSA2 homolog [Vitis vinifera]	Platanus acerifolia partial mRNA for TGF-beta inducible protein (tgf gene)	--	gi|94442901|emb|AM260497.1|	377	1e-101	Platanus acerifolia partial mRNA for TGF-beta inducible protein (tgf gene)	--	--	--	--	GO:0000398//mRNA splicing, via spliceosome;GO:0042254//ribosome biogenesis;GO:0051604//protein maturation;GO:0006412//translation	GO:0003735//structural constituent of ribosome	GO:0005840//ribosome;GO:0005634//nucleus
gi|532771606|gb|GAHT01046661.1|	Transporter	CL2704.Contig2_All	0	0	0.03	0.98457	gi|533067259|gb|GAHU01041707.1|	0	0	0.025	0	gi|255583816|ref|XP_002532660.1|	478.4	1e-133	cmp-sialic acid transporter, putative [Ricinus communis] >gi|223527620|gb|EEF29733.1| cmp-sialic acid transporter, putative [Ricinus communis]	PREDICTED: Vitis vinifera CMP-sialic acid transporter-like (LOC100244718), mRNA	CMP-sialic acid transporter 1 OS=Arabidopsis thaliana GN=At5g41760 PE=2 SV=1	gi|225454455|ref|XM_002280512.1|	387	1e-104	PREDICTED: Vitis vinifera CMP-sialic acid transporter-like (LOC100244718), mRNA	sp|Q8LGE9|CSTR1_ARATH	449	2e-126	CMP-sialic acid transporter 1 OS=Arabidopsis thaliana GN=At5g41760 PE=2 SV=1	GO:0055085//transmembrane transport;GO:0009086//methionine biosynthetic process;GO:0015739//sialic acid transport;GO:0000394//RNA splicing, via endonucleolytic cleavage and ligation;GO:0008643//carbohydrate transport;GO:0015780//nucleotide-sugar transport	GO:0015136//sialic acid transmembrane transporter activity;GO:0005351//sugar:hydrogen symporter activity;GO:0005456//CMP-N-acetylneuraminate transmembrane transporter activity	GO:0016021//integral to membrane;GO:0000139//Golgi membrane;GO:0009507//chloroplast
gi|532781483|gb|GAHT01036784.1|	Secondary metabolism	CL1079.Contig1_All	0.1626	0.0014	0.0086	0.985451	gi|533083037|gb|GAHU01025929.1|	0.7354	0.0367	0.0498	0	gi|357148197|ref|XP_003574667.1|	518.1	1e-145	PREDICTED: probable nitronate monooxygenase-like [Brachypodium distachyon]	Medicago truncatula 2-nitropropane dioxygenase-like protein (MTR_3g069190) mRNA, complete cds	--	gi|357460978|ref|XM_003600723.1|	109	8e-21	Medicago truncatula 2-nitropropane dioxygenase-like protein (MTR_3g069190) mRNA, complete cds	--	--	--	--	GO:0046482//para-aminobenzoic acid metabolic process;GO:0046686//response to cadmium ion;GO:0009610//response to symbiotic fungus;GO:0055114//oxidation-reduction process	GO:0003938//IMP dehydrogenase activity;GO:0016702//oxidoreductase activity, acting on single donors with incorporation of molecular oxygen, incorporation of two atoms of oxygen;GO:0018580//nitronate monooxygenase activity	GO:0005829//cytosol;GO:0005739//mitochondrion
gi|532806256|gb|GAHT01013346.1|	Unclassified	CL1089.Contig2_All	0.4683	0.0068	0.0145	0.987342	gi|533086340|gb|GAHU01022626.1|	0.2064	0.0045	0.0219	0	gi|356547897|ref|XP_003542341.1|	250	3e-65	PREDICTED: uncharacterized protein LOC100788142 [Glycine max]	Glycine max uncharacterized LOC100805881 (LOC100805881), mRNA	--	gi|403043554|ref|NM_001254673.2|	157	2e-35	Glycine max uncharacterized LOC100805881 (LOC100805881), mRNA	--	--	--	--	GO:0008152//metabolic process	GO:0016702//oxidoreductase activity, acting on single donors with incorporation of molecular oxygen, incorporation of two atoms of oxygen;GO:0016829//lyase activity	GO:0009507//chloroplast
gi|532814052|gb|GAHT01006872.1|	Signal Transdcution	CL6811.Contig1_All	0.9295	0.0063	0.0067	0.988359	gi|533103630|gb|GAHU01005336.1|	0.2065	0.0019	0.0093	0	gi|359483757|ref|XP_002271196.2|	604.7	1e-171	PREDICTED: CBL-interacting serine/threonine-protein kinase 12 isoform 1 [Vitis vinifera] >gi|359483759|ref|XP_003633012.1| PREDICTED: CBL-interacting serine/threonine-protein kinase 12 isoform 2 [Vitis vinifera]	Sorghum bicolor CBL-interacting protein kinase 13 (CIPK13) mRNA, complete cds	CBL-interacting serine/threonine-protein kinase 12 OS=Arabidopsis thaliana GN=CIPK12 PE=1 SV=1	gi|229609792|gb|FJ901224.1|	208	1e-50	Sorghum bicolor CBL-interacting protein kinase 13 (CIPK13) mRNA, complete cds	sp|Q9SN43|CIPKC_ARATH	582	2e-166	CBL-interacting serine/threonine-protein kinase 12 OS=Arabidopsis thaliana GN=CIPK12 PE=1 SV=1	GO:0019722//calcium-mediated signaling;GO:0010118//stomatal movement;GO:0006468//protein phosphorylation	GO:0004683//calmodulin-dependent protein kinase activity;GO:0005515//protein binding;GO:0005524//ATP binding	GO:0005886//plasma membrane
gi|532715861|gb|GAHT01100880.1|	Transporter	CL1581.Contig3_All	0.9263	0.0035	0.0038	0.988455	gi|533065169|gb|GAHU01043797.1|	0.67	0.1699	0.2536	0	gi|224124702|ref|XP_002329927.1|	447.6	3e-124	oligopeptide transporter OPT family [Populus trichocarpa] >gi|222871949|gb|EEF09080.1| oligopeptide transporter OPT family [Populus trichocarpa]	Agave tequilana cell wall invertase (Cwinv1) gene, complete cds	Oligopeptide transporter 1 OS=Arabidopsis thaliana GN=OPT1 PE=2 SV=1	gi|386688299|gb|JN790063.1|	81.8	2e-12	Agave tequilana cell wall invertase (Cwinv1) gene, complete cds	sp|Q9FG72|OPT1_ARATH	419	2e-117	Oligopeptide transporter 1 OS=Arabidopsis thaliana GN=OPT1 PE=2 SV=1	GO:0010363//regulation of plant-type hypersensitive response;GO:0015802//basic amino acid transport;GO:0015696//ammonium transport;GO:0043090//amino acid import;GO:0006857//oligopeptide transport;GO:0006820//anion transport;GO:0006862//nucleotide transport;GO:0006612//protein targeting to membrane;GO:0006944//cellular membrane fusion;GO:0043069//negative regulation of programmed cell death;GO:000…	GO:0015198//oligopeptide transporter activity	GO:0016020//membrane
gi|532758476|gb|GAHT01058896.1|	Unclassified	Unigene14058_All	0.2381	0.0021	0.0088	0.988648	gi|533049337|gb|GAHU01058229.1|	0.5383	0.0041	0.0075	0	gi|359479974|ref|XP_002273071.2|	809.7	0	PREDICTED: uncharacterized protein LOC100257191 [Vitis vinifera]	Oryza sativa Japonica Group Os03g0111800 (Os03g0111800) mRNA, complete cds	--	gi|115450254|ref|NM_001055263.1|	75.8	2e-10	Oryza sativa Japonica Group Os03g0111800 (Os03g0111800) mRNA, complete cds	--	--	--	--	-	-	-
gi|532787979|gb|GAHT01030288.1|	Unclassified	Unigene16447_All	0	0	0.0097	0.988818	gi|533078837|gb|GAHU01030129.1|	0	0	0.0089	0	gi|359475773|ref|XP_002267701.2|	487.6	2e-136	PREDICTED: uncharacterized protein LOC100257121 [Vitis vinifera]	PREDICTED: Vitis vinifera uncharacterized LOC100257121 (LOC100257121), mRNA	--	gi|359475772|ref|XM_002267665.2|	61.9	2e-06	PREDICTED: Vitis vinifera uncharacterized LOC100257121 (LOC100257121), mRNA	--	--	--	--	GO:0006306//DNA methylation;GO:0006260//DNA replication;GO:0051567//histone H3-K9 methylation;GO:0008283//cell proliferation	-	GO:0009536//plastid
gi|532793916|gb|GAHT01024351.1|	Primary Metabolism	CL14054.Contig1_All	0.0591	0.0009	0.0157	0.991607	gi|533092684|gb|GAHU01016282.1|	0.1471	0.0028	0.0189	0	gi|225463508|ref|XP_002263911.1|	808.1	0	PREDICTED: uridine kinase-like protein 4 [Vitis vinifera] >gi|296090033|emb|CBI39852.3| unnamed protein product [Vitis vinifera]	PREDICTED: Vitis vinifera uridine kinase-like protein 4 (LOC100259975), mRNA	Uridine kinase-like protein 4 OS=Arabidopsis thaliana GN=UKL4 PE=1 SV=2	gi|359494246|ref|XM_002263875.2|	587	1e-164	PREDICTED: Vitis vinifera uridine kinase-like protein 4 (LOC100259975), mRNA	sp|O65583|UKL4_ARATH	765	0	Uridine kinase-like protein 4 OS=Arabidopsis thaliana GN=UKL4 PE=1 SV=2	GO:0010498//proteasomal protein catabolic process;GO:0007010//cytoskeleton organization;GO:0006222//UMP biosynthetic process;GO:0016310//phosphorylation;GO:0006094//gluconeogenesis	GO:0004845//uracil phosphoribosyltransferase activity;GO:0004849//uridine kinase activity;GO:0016773//phosphotransferase activity, alcohol group as acceptor;GO:0005524//ATP binding	-
gi|532785287|gb|GAHT01032980.1|	Protein Destination and Storage	CL3259.Contig2_All	0.1005	0.0024	0.0234	0.992179	gi|533078386|gb|GAHU01030580.1|	0	0	0.0234	0	gi|224109742|ref|XP_002315296.1|	274.2	2e-72	predicted protein [Populus trichocarpa] >gi|222864336|gb|EEF01467.1| predicted protein [Populus trichocarpa]	PREDICTED: Vitis vinifera ubiquitin-conjugating enzyme E2 19-like (LOC100253010), mRNA	Ubiquitin-conjugating enzyme E2 20 OS=Arabidopsis thaliana GN=UBC20 PE=2 SV=1	gi|359486678|ref|XM_002275879.2|	184	1e-43	PREDICTED: Vitis vinifera ubiquitin-conjugating enzyme E2 19-like (LOC100253010), mRNA	sp|Q8L7T3|UBC20_ARATH	228	3e-60	Ubiquitin-conjugating enzyme E2 20 OS=Arabidopsis thaliana GN=UBC20 PE=2 SV=1	GO:0016567//protein ubiquitination	GO:0005524//ATP binding;GO:0004842//ubiquitin-protein ligase activity	GO:0044424//intracellular part
gi|532789097|gb|GAHT01029170.1|	Primary Metabolism	Unigene32137_All	0.7289	0.012	0.0164	0.993998	gi|533076493|gb|GAHU01032473.1|	0.4122	0.008	0.0194	0	gi|225462522|ref|XP_002264528.1|	590.9	1e-167	PREDICTED: galacturonokinase [Vitis vinifera] >gi|296090474|emb|CBI40670.3| unnamed protein product [Vitis vinifera]	Oryza sativa (indica cultivar-group) cDNA clone:OSIGCPI220F20, full insert sequence	Galacturonokinase OS=Arabidopsis thaliana GN=GALAK PE=1 SV=1	gi|116632360|emb|CT832164.1|	85.7	1e-13	Oryza sativa (indica cultivar-group) cDNA clone:OSIGCPI220F20, full insert sequence	sp|Q8VYG2|GALAK_ARATH	562	2e-160	Galacturonokinase OS=Arabidopsis thaliana GN=GALAK PE=1 SV=1	GO:0046835//carbohydrate phosphorylation;GO:0046396//D-galacturonate metabolic process;GO:0006012//galactose metabolic process	GO:0005524//ATP binding;GO:0004335//galactokinase activity;GO:0047912//galacturonokinase activity	GO:0005829//cytosol
gi|532795654|gb|GAHT01023227.1|	Cell Structure	CL1306.Contig4_All	0.0315	0.0017	0.0527	0.995416	gi|533084404|gb|GAHU01024562.1|	0	0	0.0071	0	gi|225448968|ref|XP_002269663.1|	409.5	1e-112	PREDICTED: probable exocyst complex component 4-like isoform 1 [Vitis vinifera]	PREDICTED: Vitis vinifera probable exocyst complex component 4-like, transcript variant 1 (LOC100253015), mRNA	Probable exocyst complex component 4 OS=Arabidopsis thaliana GN=SEC8 PE=1 SV=1	gi|225448967|ref|XM_002269627.1|	198	3e-47	PREDICTED: Vitis vinifera probable exocyst complex component 4-like, transcript variant 1 (LOC100253015), mRNA	sp|Q93YU5|EXOC4_ARATH	986	0	Probable exocyst complex component 4 OS=Arabidopsis thaliana GN=SEC8 PE=1 SV=1	GO:0006007//glucose catabolic process;GO:0009860//pollen tube growth;GO:0009846//pollen germination;GO:0048354//mucilage biosynthetic process involved in seed coat development;GO:0006904//vesicle docking involved in exocytosis;GO:0015031//protein transport	GO:0005515//protein binding	GO:0005829//cytosol;GO:0000145//exocyst;GO:0009506//plasmodesma;GO:0005634//nucleus;GO:0005886//plasma membrane
gi|532789046|gb|GAHT01029221.1|	Unclassified	CL15895.Contig1_All	0.1878	0.0031	0.0164	0.995594	gi|533093903|gb|GAHU01015063.1|	0.0725	0.0014	0.0195	0	gi|359484685|ref|XP_002262947.2|	390.2	4e-107	PREDICTED: protein OS-9-like [Vitis vinifera]	Lotus japonicus cDNA, clone: LjFL2-001-BB10, HTC	--	gi|292774666|dbj|AK337858.1|	93.7	5e-16	Lotus japonicus cDNA, clone: LjFL2-001-BB10, HTC	--	--	--	--	GO:0034976//response to endoplasmic reticulum stress;GO:0030433//ER-associated protein catabolic process;GO:0006457//protein folding;GO:0009651//response to salt stress;GO:0030244//cellulose biosynthetic process;GO:0009408//response to heat;GO:0048193//Golgi vesicle transport;GO:0009644//response to high light intensity;GO:0042542//response to hydrogen peroxide	-	GO:0016023//cytoplasmic membrane-bounded vesicle;GO:0005783//endoplasmic reticulum
gi|532792544|gb|GAHT01025723.1|	Protein Destination and Storage	CL5494.Contig1_All	0	0	0.0193	0.995645	gi|533064753|gb|GAHU01044213.1|	0	0	0.0326	0	gi|356521345|ref|XP_003529317.1|	451.8	8e-126	PREDICTED: probable E3 ubiquitin-protein ligase makorin-1-like [Glycine max]	PREDICTED: Vitis vinifera uncharacterized LOC100244841 (LOC100244841), mRNA	--	gi|359497084|ref|XM_002268969.2|	228	1e-56	PREDICTED: Vitis vinifera uncharacterized LOC100244841 (LOC100244841), mRNA	--	--	--	--	-	GO:0008270//zinc ion binding	-
gi|532785763|gb|GAHT01032504.1|	Primary Metabolism	CL3862.Contig2_All	0.2537	0.0408	0.161	0.996248	gi|533059756|gb|GAHU01049210.1|	0.3871	0.0037	0.0095	0	gi|242095310|ref|XP_002438145.1|	604	2e-171	hypothetical protein SORBIDRAFT_10g008770 [Sorghum bicolor] >gi|241916368|gb|EER89512.1| hypothetical protein SORBIDRAFT_10g008770 [Sorghum bicolor]	PREDICTED: Vitis vinifera mannosidase, alpha, class 2A, member 2 (MAN2A2), mRNA	--	gi|359488882|ref|XM_002276432.2|	121	3e-24	PREDICTED: Vitis vinifera mannosidase, alpha, class 2A, member 2 (MAN2A2), mRNA	--	--	--	--	GO:0006013//mannose metabolic process;GO:0006487//protein N-linked glycosylation	GO:0030246//carbohydrate binding;GO:0004572//mannosyl-oligosaccharide 1,3-1,6-alpha-mannosidase activity;GO:0008270//zinc ion binding	GO:0005768//endosome;GO:0005794//Golgi apparatus;GO:0005802//trans-Golgi network
gi|532755762|gb|GAHT01061608.1|	Unclassified	CL8031.Contig1_All	0.1113	0.0017	0.0155	0.996814	gi|532998761|gb|GAHU01085692.1|	0.6594	0.0083	0.0126	0	gi|302780595|ref|XP_002972072.1|	166.8	4e-40	hypothetical protein SELMODRAFT_441668 [Selaginella moellendorffii] >gi|300160371|gb|EFJ26989.1| hypothetical protein SELMODRAFT_441668 [Selaginella moellendorffii]	--	--	--	--	--	--	--	--	--	--	-	-	-
gi|532806958|gb|GAHT01012644.1|	Transcription Factor	CL2505.Contig3_All	0	0	0.0033	0.997261	gi|533100505|gb|GAHU01008461.1|	0	0	0	0	gi|297736093|emb|CBI24131.3|	596.3	4e-169	unnamed protein product [Vitis vinifera]	PREDICTED: Vitis vinifera general transcription factor 3C polypeptide 3-like (LOC100257006), mRNA	--	gi|225462327|ref|XM_002265663.1|	81.8	2e-12	PREDICTED: Vitis vinifera general transcription factor 3C polypeptide 3-like (LOC100257006), mRNA	--	--	--	--	GO:0016192//vesicle-mediated transport;GO:0006396//RNA processing;GO:0022402//cell cycle process;GO:0048573//photoperiodism, flowering;GO:0048522//positive regulation of cellular process;GO:0000956//nuclear-transcribed mRNA catabolic process;GO:0009410//response to xenobiotic stimulus;GO:0006944//cellular membrane fusion	-	-
gi|532775270|gb|GAHT01042997.1|	Unclassified	CL7438.Contig2_All	0.0898	0.003	0.0338	0.997562	gi|533052627|gb|GAHU01055418.1|	0.1059	0.0015	0.0142	0	gi|359491022|ref|XP_003634205.1|	505.8	5e-142	PREDICTED: uncharacterized protein LOC100853969 [Vitis vinifera]	PREDICTED: Vitis vinifera uncharacterized LOC100853969 (LOC100853969), mRNA	--	gi|359491021|ref|XM_003634157.1|	200	2e-48	PREDICTED: Vitis vinifera uncharacterized LOC100853969 (LOC100853969), mRNA	--	--	--	--	GO:0006629//lipid metabolic process;GO:0009744//response to sucrose stimulus;GO:0010224//response to UV-B;GO:0009813//flavonoid biosynthetic process;GO:0009627//systemic acquired resistance;GO:0031347//regulation of defense response	GO:0016627//oxidoreductase activity, acting on the CH-CH group of donors	GO:0005739//mitochondrion;GO:0016021//integral to membrane;GO:0009506//plasmodesma;GO:0005774//vacuolar membrane;GO:0016023//cytoplasmic membrane-bounded vesicle;GO:0009507//chloroplast;GO:0005794//Golgi apparatus;GO:0005783//endoplasmic reticulum;GO:0005886//plasma membrane
gi|532763368|gb|GAHT01054899.1|	Protein Destination and Storage	CL1315.Contig5_All	0.1656	0.0058	0.035	0.99798	gi|533048110|gb|GAHU01059456.1|	0.4756	0.0361	0.0759	0	gi|255557983|ref|XP_002520020.1|	585.9	8e-166	protein binding protein, putative [Ricinus communis] >gi|223540784|gb|EEF42344.1| protein binding protein, putative [Ricinus communis]	PREDICTED: Vitis vinifera E3 ubiquitin-protein ligase synoviolin-like (LOC100252838), mRNA	E3 ubiquitin protein ligase RIN2 OS=Arabidopsis thaliana GN=RIN2 PE=1 SV=1	gi|359489893|ref|XM_002274295.2|	125	2e-25	PREDICTED: Vitis vinifera E3 ubiquitin-protein ligase synoviolin-like (LOC100252838), mRNA	sp|Q8VYC8|RIN2_ARATH	106	5e-23	E3 ubiquitin protein ligase RIN2 OS=Arabidopsis thaliana GN=RIN2 PE=1 SV=1	GO:0034976//response to endoplasmic reticulum stress;GO:0008295//spermidine biosynthetic process;GO:0030433//ER-associated protein catabolic process;GO:0006457//protein folding;GO:0009408//response to heat;GO:0009644//response to high light intensity;GO:0042542//response to hydrogen peroxide	GO:0008270//zinc ion binding;GO:0016874//ligase activity	GO:0016023//cytoplasmic membrane-bounded vesicle;GO:0005886//plasma membrane
gi|532785951|gb|GAHT01032316.1|	Unclassified	Unigene31288_All	0.1553	0.0363	0.234	0.998299	gi|533050893|gb|GAHU01056673.1|	0.7407	0.0697	0.0941	0	gi|225425061|ref|XP_002271546.1|	330.5	3e-89	PREDICTED: anamorsin homolog [Vitis vinifera]	Oryza sativa Japonica Group cDNA, clone: J100080M19, full insert sequence	Anamorsin homolog OS=Vitis vinifera GN=VIT_01s0010g01180 PE=3 SV=1	gi|116012929|dbj|AK243564.1|	155	1e-34	Oryza sativa Japonica Group cDNA, clone: J100080M19, full insert sequence	sp|D1I234|DRE2_VITVI	328	5e-90	Anamorsin homolog OS=Vitis vinifera GN=VIT_01s0010g01180 PE=3 SV=1	GO:0008152//metabolic process	-	-
gi|532764321|gb|GAHT01053946.1|	Primary Metabolism	Unigene150_All	0.0621	0.0009	0.0146	0.999233	gi|533075680|gb|GAHU01033286.1|	0	0	0.0105	0	gi|225423430|ref|XP_002273643.1|	730.3	0	PREDICTED: folic acid synthesis protein fol1-like [Vitis vinifera]	PREDICTED: Vitis vinifera folic acid synthesis protein fol1-like (LOC100252672), mRNA	--	gi|225423429|ref|XM_002273607.1|	111	2e-21	PREDICTED: Vitis vinifera folic acid synthesis protein fol1-like (LOC100252672), mRNA	--	--	--	--	GO:0006979//response to oxidative stress;GO:0046654//tetrahydrofolate biosynthetic process	GO:0004156//dihydropteroate synthase activity;GO:0003848//2-amino-4-hydroxy-6-hydroxymethyldihydropteridine diphosphokinase activity	GO:0005829//cytosol;GO:0005739//mitochondrion
gi|532798194|gb|GAHT01021408.1|	Unclassified	Unigene93_All	0.0573	0.0066	0.1151	0.999488	gi|533094589|gb|GAHU01014377.1|	0	0	0.0196	0	#N/A	#N/A	#N/A	#N/A	#N/A	#N/A	#N/A	#N/A	#N/A	#N/A	#N/A	#N/A	#N/A	#N/A	#N/A	#N/A	#N/A
gi|532783703|gb|GAHT01034564.1|	Primary Metabolism	CL1688.Contig7_All	0	0	0	0.999539	gi|533075647|gb|GAHU01033319.1|	0	0	0.0041	0	gi|225432124|ref|XP_002264226.1|	247.3	4e-64	PREDICTED: DNA (cytosine-5)-methyltransferase DRM2-like [Vitis vinifera]	PREDICTED: Glycine max DNA (cytosine-5)-methyltransferase DRM1-like (LOC100817269), mRNA	DNA (cytosine-5)-methyltransferase DRM1 OS=Arabidopsis thaliana GN=DRM1 PE=4 SV=2	gi|356564665|ref|XM_003550524.1|	71.9	2e-09	PREDICTED: Glycine max DNA (cytosine-5)-methyltransferase DRM1-like (LOC100817269), mRNA	sp|Q9LXE5|DRM1_ARATH	71.6	1e-12	DNA (cytosine-5)-methyltransferase DRM1 OS=Arabidopsis thaliana GN=DRM1 PE=4 SV=2	-	-	-
gi|532785220|gb|GAHT01033047.1|	Cell growth/division	CL19448.Contig1_All	0	0	0.0312	0.999594	gi|533051627|gb|GAHU01056065.1|	0	0	0.0062	0	gi|356561426|ref|XP_003548982.1|	358.6	6e-98	PREDICTED: UPF0496 protein 4-like [Glycine max]	Prunus persica clone JGIBIXB-13C4, complete sequence	Vegetative cell wall protein gp1 OS=Chlamydomonas reinhardtii GN=GP1 PE=2 SV=1	gi|404312709|gb|AC253538.1|	75.8	7e-11	Prunus persica clone JGIBIXB-13C4, complete sequence	sp|Q9FPQ6|GP1_CHLRE	83.2	2e-16	Vegetative cell wall protein gp1 OS=Chlamydomonas reinhardtii GN=GP1 PE=2 SV=1	GO:0010363//regulation of plant-type hypersensitive response;GO:0009611//response to wounding;GO:0009963//positive regulation of flavonoid biosynthetic process;GO:0010200//response to chitin;GO:0006612//protein targeting to membrane;GO:0009612//response to mechanical stimulus	-	GO:0009507//chloroplast;GO:0005634//nucleus
gi|532800075|gb|GAHT01019527.1|	Signal Transdcution	CL10555.Contig1_All	0	0	0.1199	0.999658	gi|533100199|gb|GAHU01008767.1|	0	0	0.0355	0	gi|192910878|gb|ACF06547.1|	438.7	6e-122	Mob1 [Elaeis guineensis]	Vitis vinifera clone SS0AP1YP01	MOB kinase activator-like 1 OS=Arabidopsis thaliana GN=At4g19045 PE=2 SV=1	gi|349713242|emb|FQ391410.1|	498	1e-138	Vitis vinifera clone SS0AP1YP01	sp|Q8GYX0|MOB1_ARATH	417	4e-117	MOB kinase activator-like 1 OS=Arabidopsis thaliana GN=At4g19045 PE=2 SV=1	GO:0009554//megasporogenesis;GO:0016049//cell growth;GO:0009651//response to salt stress;GO:0000902//cell morphogenesis;GO:0009556//microsporogenesis;GO:0006816//calcium ion transport;GO:0007030//Golgi organization;GO:0016310//phosphorylation;GO:0048193//Golgi vesicle transport	GO:0016301//kinase activity	GO:0009507//chloroplast;GO:0005634//nucleus
gi|532797269|gb|GAHT01022333.1|	Transcription Factor	CL2277.Contig2_All	0.0475	0.0012	0.0262	0.999676	gi|533087765|gb|GAHU01021201.1|	0	0	0.0037	0	gi|326417169|gb|ADZ73426.1|	304.3	3e-81	B-zip transcription factor [Vitis pseudoreticulata]	Lotus japonicus cDNA, clone: LjFL1-033-AB01, HTC	--	gi|292744502|dbj|AK336898.1|	75.8	1e-10	Lotus japonicus cDNA, clone: LjFL1-033-AB01, HTC	--	--	--	--	-	-	GO:0016023//cytoplasmic membrane-bounded vesicle;GO:0031307//integral to mitochondrial outer membrane
gi|532807867|gb|GAHT01012157.1|	Protein Destination and Storage	CL16198.Contig1_All	0	0	0.0241	0.999744	gi|533091026|gb|GAHU01017940.1|	0	0	0.0105	0	gi|224145515|ref|XP_002325671.1|	651.7	0	predicted protein [Populus trichocarpa] >gi|222862546|gb|EEF00053.1| predicted protein [Populus trichocarpa]	Medicago truncatula Sorting nexin-1 (MTR_5g073280) mRNA, complete cds	Sorting nexin 2B OS=Arabidopsis thaliana GN=SNX2B PE=1 SV=1	gi|357491160|ref|XM_003615820.1|	141	3e-30	Medicago truncatula Sorting nexin-1 (MTR_5g073280) mRNA, complete cds	sp|B9DFS6|SNX2B_ARATH	617	5e-177	Sorting nexin 2B OS=Arabidopsis thaliana GN=SNX2B PE=1 SV=1	GO:0045324//late endosome to vacuole transport;GO:0035556//intracellular signal transduction;GO:0051604//protein maturation;GO:0090351//seedling development	GO:0035091//phosphatidylinositol binding;GO:0043621//protein self-association;GO:0046982//protein heterodimerization activity	GO:0005829//cytosol;GO:0030904//retromer complex;GO:0032585//multivesicular body membrane;GO:0005634//nucleus
gi|532813627|gb|GAHT01007297.1|	Protein Synthesis	Unigene25081_All	0	0	0.0211	0.999789	gi|533094594|gb|GAHU01014372.1|	0.2071	0.0021	0.0102	0	gi|30795125|gb|AAF26738.2|AF220453_1	867.1	0	beta-ketoacyl-ACP synthase II [Elaeis guineensis]	Elaeis guineensis beta-ketoacyl-ACP synthase II mRNA, complete cds	3-oxoacyl-[acyl-carrier-protein] synthase II, chloroplastic OS=Arabidopsis thaliana GN=KAS2 PE=1 SV=1	gi|30795124|gb|AF220453.2|	757	0	Elaeis guineensis beta-ketoacyl-ACP synthase II mRNA, complete cds	sp|Q9C9P4|KASC2_ARATH	774	0	3-oxoacyl-[acyl-carrier-protein] synthase II, chloroplastic OS=Arabidopsis thaliana GN=KAS2 PE=1 SV=1	GO:0006633//fatty acid biosynthetic process;GO:0009793//embryo development ending in seed dormancy;GO:0009631//cold acclimation	GO:0004315//3-oxoacyl-[acyl-carrier-protein] synthase activity	-
gi|532783781|gb|GAHT01034486.1|	Cell growth/division	Unigene31376_All	0.2857	0.0047	0.0163	0.999815	gi|533072158|gb|GAHU01036808.1|	0	0	0.0022	0	gi|255541318|ref|XP_002511723.1|	901	0	ku P80 DNA helicase, putative [Ricinus communis] >gi|223548903|gb|EEF50392.1| ku P80 DNA helicase, putative [Ricinus communis]	Oryza sativa Japonica Group cDNA clone:002-100-G04, full insert sequence	ATP-dependent DNA helicase 2 subunit KU80 OS=Oryza sativa subsp. japonica GN=KU80 PE=1 SV=1	gi|32974115|dbj|AK064097.1|	234	3e-58	Oryza sativa Japonica Group cDNA clone:002-100-G04, full insert sequence	sp|Q75IP6|KU80_ORYSJ	813	0	ATP-dependent DNA helicase 2 subunit KU80 OS=Oryza sativa subsp. japonica GN=KU80 PE=1 SV=1	GO:0006303//double-strand break repair via nonhomologous end joining;GO:0009408//response to heat;GO:0006310//DNA recombination	GO:0004003//ATP-dependent DNA helicase activity;GO:0003690//double-stranded DNA binding	GO:0005958//DNA-dependent protein kinase-DNA ligase 4 complex
gi|532820298|gb|GAHT01000626.1|	Protein Destination and Storage	CL5449.Contig4_All	0	0	0.0309	0.99982	gi|533107897|gb|GAHU01001069.1|	0	0	0.0297	0	gi|359806806|ref|NP_001241052.1|	270.8	1e-71	uncharacterized protein LOC100798104 [Glycine max]	Glycine max SKP1-like protein 1A-like (LOC100798104), mRNA	SKP1-like protein 1A OS=Arabidopsis thaliana GN=SKP1A PE=1 SV=1	gi|359806805|ref|NM_001254123.1|	278	8e-72	Glycine max SKP1-like protein 1A-like (LOC100798104), mRNA	sp|Q39255|SKP1A_ARATH	256	1e-68	SKP1-like protein 1A OS=Arabidopsis thaliana GN=SKP1A PE=1 SV=1	GO:0006511//ubiquitin-dependent protein catabolic process	-	-
gi|532756169|gb|GAHT01061201.1|	Transporter	Unigene42201_All	0	0	0.0249	0.999828	gi|533030524|gb|GAHU01070304.1|	0	0	0.0173	0	gi|326494278|dbj|BAJ90408.1|	608.2	7e-173	predicted protein [Hordeum vulgare subsp. vulgare] >gi|326529871|dbj|BAK08215.1| predicted protein [Hordeum vulgare subsp. vulgare]	Solanum lycopersicum cDNA, clone: LEFL1033AG05, HTC in leaf	Sugar transport protein 14 OS=Arabidopsis thaliana GN=STP14 PE=2 SV=2	gi|225316129|dbj|AK322083.1|	119	6e-24	Solanum lycopersicum cDNA, clone: LEFL1033AG05, HTC in leaf	sp|Q8GW61|STP14_ARATH	569	1e-162	Sugar transport protein 14 OS=Arabidopsis thaliana GN=STP14 PE=2 SV=2	GO:0055085//transmembrane transport;GO:0055114//oxidation-reduction process;GO:0015757//galactose transport	GO:0005354//galactose transmembrane transporter activity;GO:0005524//ATP binding;GO:0004386//helicase activity;GO:0032440//2-alkenal reductase [NAD(P)] activity;GO:0005351//sugar:hydrogen symporter activity	GO:0016021//integral to membrane;GO:0016023//cytoplasmic membrane-bounded vesicle;GO:0005886//plasma membrane
gi|532767099|gb|GAHT01051168.1|	Unclassified	CL14798.Contig1_All	0	0	0.0321	0.999828	gi|533063365|gb|GAHU01045601.1|	0	0	0.0244	0	gi|255547021|ref|XP_002514568.1|	485.7	5e-136	conserved hypothetical protein [Ricinus communis] >gi|223546172|gb|EEF47674.1| conserved hypothetical protein [Ricinus communis]	PREDICTED: Glycine max uncharacterized protein LOC100782205 (LOC100782205), mRNA	--	gi|356502667|ref|XM_003520091.1|	93.7	4e-16	PREDICTED: Glycine max uncharacterized protein LOC100782205 (LOC100782205), mRNA	--	--	--	--	-	-	-
gi|532776407|gb|GAHT01041860.1|	Cell Structure	CL18430.Contig2_All	0	0	0.023	0.999834	gi|533093071|gb|GAHU01015895.1|	0.3513	0.0039	0.011	0	gi|102140015|gb|ABF70146.1|	106.3	2e-22	hypothetical protein MA4_112I10.14 [Musa acuminata]	Musa acuminata clone MA4_112I10, complete sequence	Leucine-rich repeat extensin-like protein 5 OS=Arabidopsis thaliana GN=LRX5 PE=2 SV=2	gi|102140012|gb|AC186756.1|	103	2e-19	Musa acuminata clone MA4_112I10, complete sequence	sp|Q9SN46|LRX5_ARATH	65.1	3e-11	Leucine-rich repeat extensin-like protein 5 OS=Arabidopsis thaliana GN=LRX5 PE=2 SV=2	-	-	-
gi|532811384|gb|GAHT01009540.1|	Protein Synthesis	CL7690.Contig6_All	0.0146	0.0022	0.1478	0.999839	gi|533102191|gb|GAHU01006775.1|	0.3229	0.0022	0.0067	0	gi|192913004|gb|ACF06610.1|	410.2	2e-113	ribosomal protein L15 [Elaeis guineensis]	Oryza rufipogon (W1943) cDNA clone: ORW1943C108I17, full insert sequence	60S ribosomal protein L15-2 OS=Picea mariana GN=SB62 PE=2 SV=1	gi|150171435|emb|CU405870.1|	472	1e-130	Oryza rufipogon (W1943) cDNA clone: ORW1943C108I17, full insert sequence	sp|O65082|RL15B_PICMA	384	4e-107	60S ribosomal protein L15-2 OS=Picea mariana GN=SB62 PE=2 SV=1	GO:0006412//translation	GO:0003735//structural constituent of ribosome	GO:0005730//nucleolus;GO:0005886//plasma membrane;GO:0022625//cytosolic large ribosomal subunit;GO:0005739//mitochondrion
gi|532811747|gb|GAHT01009177.1|	Transcription	CL14675.Contig1_All	0	0	0.0367	0.99984	gi|533098997|gb|GAHU01009969.1|	0	0	0.0144	0	gi|224057994|ref|XP_002299427.1|	277.7	1e-73	predicted protein [Populus trichocarpa] >gi|222846685|gb|EEE84232.1| predicted protein [Populus trichocarpa]	Zea mays mediator complex subunit 10 CG5057-PA (LOC100284160), mRNA >gi|195639907|gb|EU967304.1| Zea mays clone 301277 mediator complex subunit 10 CG5057-PA mRNA, complete cds	Mediator of RNA polymerase II transcription subunit 10b OS=Arabidopsis thaliana GN=MED10B PE=1 SV=1	gi|226505539|ref|NM_001157057.1|	238	9e-60	Zea mays mediator complex subunit 10 CG5057-PA (LOC100284160), mRNA >gi|195639907|gb|EU967304.1| Zea mays clone 301277 mediator complex subunit 10 CG5057-PA mRNA, complete cds	sp|F4HPA7|MD10B_ARATH	255	3e-68	Mediator of RNA polymerase II transcription subunit 10b OS=Arabidopsis thaliana GN=MED10B PE=1 SV=1	GO:0006357//regulation of transcription from RNA polymerase II promoter;GO:0006457//protein folding	GO:0001104//RNA polymerase II transcription cofactor activity;GO:0051082//unfolded protein binding	GO:0016592//mediator complex;GO:0016272//prefoldin complex
gi|532786497|gb|GAHT01031770.1|	Disease/defense	CL9324.Contig1_All	0	0	0.0233	0.999844	gi|533090420|gb|GAHU01018546.1|	0	0	0.0229	0	gi|298204749|emb|CBI25247.3|	521.2	1e-146	unnamed protein product [Vitis vinifera]	Phyllostachys edulis cDNA clone: bphyem210n06, full insert sequence	Probable DNA repair protein RAD23 OS=Oryza sativa subsp. japonica GN=RAD23 PE=1 SV=2	gi|242384803|emb|FP093050.1|	188	1e-44	Phyllostachys edulis cDNA clone: bphyem210n06, full insert sequence	sp|Q40742|RAD23_ORYSJ	365	3e-101	Probable DNA repair protein RAD23 OS=Oryza sativa subsp. japonica GN=RAD23 PE=1 SV=2	GO:0043161//proteasomal ubiquitin-dependent protein catabolic process;GO:0006289//nucleotide-excision repair;GO:0007126//meiosis;GO:0033044//regulation of chromosome organization;GO:0006284//base-excision repair	GO:0003684//damaged DNA binding;GO:0043130//ubiquitin binding;GO:0070628//proteasome binding	GO:0005634//nucleus
gi|532789448|gb|GAHT01028819.1|	Unclassified	CL18799.Contig2_All	0	0	0.0406	0.999851	gi|533087618|gb|GAHU01021348.1|	0	0	0	0	gi|225437649|ref|XP_002279089.1|	343.6	1e-93	PREDICTED: protein ECHIDNA [Vitis vinifera] >gi|297744023|emb|CBI36993.3| unnamed protein product [Vitis vinifera]	PREDICTED: Vitis vinifera protein ECHIDNA-like (LOC100260558), mRNA	Protein ECHIDNA OS=Arabidopsis thaliana GN=ECH PE=2 SV=1	gi|225437648|ref|XM_002279053.1|	291	5e-76	PREDICTED: Vitis vinifera protein ECHIDNA-like (LOC100260558), mRNA	sp|Q8LEK2|FA18_ARATH	327	5e-90	Protein ECHIDNA OS=Arabidopsis thaliana GN=ECH PE=2 SV=1	GO:0007030//Golgi organization;GO:0009826//unidimensional cell growth;GO:0009306//protein secretion	-	GO:0005768//endosome;GO:0005794//Golgi apparatus;GO:0016023//cytoplasmic membrane-bounded vesicle;GO:0016021//integral to membrane;GO:0005802//trans-Golgi network
gi|532765764|gb|GAHT01052503.1|	Unclassified	CL7996.Contig1_All	0	0	0.0347	0.999854	gi|533057163|gb|GAHU01051557.1|	0	0	0.0137	0	gi|224083679|ref|XP_002307084.1|	388.3	1e-106	predicted protein [Populus trichocarpa] >gi|222856533|gb|EEE94080.1| predicted protein [Populus trichocarpa]	PREDICTED: Glycine max ras-related protein RABH1e-like (LOC100809676), mRNA	Ras-related protein RABH1e OS=Arabidopsis thaliana GN=RABH1E PE=2 SV=1	gi|356538149|ref|XM_003537519.1|	410	1e-111	PREDICTED: Glycine max ras-related protein RABH1e-like (LOC100809676), mRNA	sp|Q9LFT9|RAH1E_ARATH	369	2e-102	Ras-related protein RABH1e OS=Arabidopsis thaliana GN=RABH1E PE=2 SV=1	GO:0007264//small GTPase mediated signal transduction;GO:0032940//secretion by cell;GO:0006891//intra-Golgi vesicle-mediated transport;GO:0009860//pollen tube growth;GO:0006944//cellular membrane fusion;GO:0009827//plant-type cell wall modification;GO:0015031//protein transport	GO:0016787//hydrolase activity;GO:0005525//GTP binding	GO:0005739//mitochondrion;GO:0005794//Golgi apparatus;GO:0005886//plasma membrane
gi|532809158|gb|GAHT01011354.1|	Unclassified	CL15956.Contig5_All	0	0	0.0381	0.999857	gi|533089701|gb|GAHU01019265.1|	0.352	0.0551	0.1566	0	gi|326499518|dbj|BAJ86070.1|	107.1	3e-22	predicted protein [Hordeum vulgare subsp. vulgare]	--	--	--	--	--	--	--	--	--	--	-	-	-
gi|532809163|gb|GAHT01011349.1|	Transporter	Unigene21216_All	0	0	0.0331	0.999866	gi|533079366|gb|GAHU01029600.1|	0	0	0.0075	0	gi|222630323|gb|EEE62455.1|	298.5	5e-80	hypothetical protein OsJ_17248 [Oryza sativa Japonica Group]	PREDICTED: Brachypodium distachyon zinc transporter 6-like (LOC100827984), mRNA	Zinc transporter 6 OS=Oryza sativa subsp. japonica GN=ZIP6 PE=2 SV=1	gi|357134497|ref|XM_003568806.1|	151	1e-33	PREDICTED: Brachypodium distachyon zinc transporter 6-like (LOC100827984), mRNA	sp|Q6L8F9|ZIP6_ORYSJ	298	2e-81	Zinc transporter 6 OS=Oryza sativa subsp. japonica GN=ZIP6 PE=2 SV=1	GO:0009624//response to nematode;GO:0071577//zinc ion transmembrane transport;GO:0055114//oxidation-reduction process	GO:0032440//2-alkenal reductase [NAD(P)] activity;GO:0008270//zinc ion binding;GO:0005385//zinc ion transmembrane transporter activity	GO:0005886//plasma membrane;GO:0016021//integral to membrane
gi|532775849|gb|GAHT01042418.1|	Unclassified	Unigene31756_All	0	0	0.015	0.999867	gi|533054976|gb|GAHU01053376.1|	0	0	0	0	gi|357112037|ref|XP_003557816.1|	322	4e-87	PREDICTED: uncharacterized protein LOC100832491 [Brachypodium distachyon]	Lotus japonicus cDNA, clone: LjFL1-018-DA11, HTC	--	gi|292728471|dbj|AK336681.1|	139	4e-30	Lotus japonicus cDNA, clone: LjFL1-018-DA11, HTC	--	--	--	--	GO:0009560//embryo sac egg cell differentiation	-	GO:0009507//chloroplast
gi|532795099|gb|GAHT01023385.1|	Protein Destination and Storage	Unigene21675_All	0.0323	0.0079	0.2446	0.999874	gi|533073829|gb|GAHU01035137.1|	0	0	0.0204	0	gi|192912968|gb|ACF06592.1|	391.3	1e-107	breast adenocarcinoma marker-like [Elaeis guineensis]	Hordeum vulgare subsp. vulgare cDNA clone: FLbaf82n08, mRNA sequence	Vacuolar protein sorting-associated protein 2 homolog 1 OS=Arabidopsis thaliana GN=VPS2.1 PE=1 SV=2	gi|151419097|dbj|AK250448.1|	327	1e-86	Hordeum vulgare subsp. vulgare cDNA clone: FLbaf82n08, mRNA sequence	sp|Q9SKI2|VPS2A_ARATH	377	5e-105	Vacuolar protein sorting-associated protein 2 homolog 1 OS=Arabidopsis thaliana GN=VPS2.1 PE=1 SV=2	GO:0006944//cellular membrane fusion;GO:0009644//response to high light intensity;GO:0048193//Golgi vesicle transport;GO:0010200//response to chitin;GO:0042542//response to hydrogen peroxide;GO:0015031//protein transport	GO:0005515//protein binding	GO:0005771//multivesicular body;GO:0000815//ESCRT III complex
gi|532773867|gb|GAHT01044400.1|	Cell growth/division	CL5399.Contig1_All	0	0	0.0255	0.999875	gi|533071529|gb|GAHU01037437.1|	0.1558	0.0016	0.0101	0	gi|225444861|ref|XP_002281183.1|	299.7	5e-80	PREDICTED: uncharacterized protein LOC100254369 [Vitis vinifera] >gi|297738637|emb|CBI27882.3| unnamed protein product [Vitis vinifera]	Zea mays full-length cDNA clone ZM_BFb0336L09 mRNA, complete cds	Telomere repeat-binding factor 4 OS=Arabidopsis thaliana GN=At1g17520 PE=2 SV=2	gi|223946650|gb|BT062712.1|	89.7	6e-15	Zea mays full-length cDNA clone ZM_BFb0336L09 mRNA, complete cds	sp|F4I7L1|TRB4_ARATH	213	2e-55	Telomere repeat-binding factor 4 OS=Arabidopsis thaliana GN=At1g17520 PE=2 SV=2	GO:0009725//response to hormone stimulus	-	GO:0009536//plastid
gi|532767848|gb|GAHT01050419.1|	Transcription	CL19714.Contig1_All	0	0	0.0229	0.999876	gi|533077384|gb|GAHU01031582.1|	0	0	0.0076	0	gi|192910670|gb|ACF06443.1|	264.2	1e-69	DNA-directed RNA polymerases II 24 kDa polypeptide [Elaeis guineensis]	--	--	--	--	--	--	--	--	--	--	GO:0006626//protein targeting to mitochondrion;GO:0051604//protein maturation;GO:0006351//transcription, DNA-dependent	GO:0003899//DNA-directed RNA polymerase activity;GO:0003677//DNA binding	GO:0000418//DNA-directed RNA polymerase IV complex;GO:0005665//DNA-directed RNA polymerase II, core complex
gi|532802846|gb|GAHT01016756.1|	Unclassified	CL6936.Contig1_All	0	0	0.0464	0.999877	gi|533069980|gb|GAHU01038986.1|	0	0	0.0338	0	gi|255572882|ref|XP_002527373.1|	238.8	4e-62	conserved hypothetical protein [Ricinus communis] >gi|223533292|gb|EEF35045.1| conserved hypothetical protein [Ricinus communis]	PREDICTED: Vitis vinifera uncharacterized LOC100255697 (LOC100255697), mRNA	Uncharacterized protein At5g64816 OS=Arabidopsis thaliana GN=At5g64816 PE=2 SV=1	gi|225459102|ref|XM_002283832.1|	172	3e-40	PREDICTED: Vitis vinifera uncharacterized LOC100255697 (LOC100255697), mRNA	sp|Q8L8Q8|Y5486_ARATH	233	7e-62	Uncharacterized protein At5g64816 OS=Arabidopsis thaliana GN=At5g64816 PE=2 SV=1	-	-	-
gi|532818206|gb|GAHT01002718.1|	Primary Metabolism	CL8519.Contig1_All	0.0414	0.0066	0.1596	0.999882	gi|533100369|gb|GAHU01008597.1|	0	0	0.0226	0	gi|225449989|ref|XP_002273592.1|	335.9	1e-90	PREDICTED: N-alpha-acetyltransferase 11 [Vitis vinifera] >gi|147777205|emb|CAN61153.1| hypothetical protein VITISV_013774 [Vitis vinifera]	Hyacinthus orientalis cultivar Delft Blue N-acetyltransferase ARD1-like protein-like mRNA, partial sequence	50S ribosomal protein L18, chloroplastic OS=Arabidopsis thaliana GN=RPL18 PE=1 SV=1	gi|254036278|gb|AY307067.1|	537	1e-149	Hyacinthus orientalis cultivar Delft Blue N-acetyltransferase ARD1-like protein-like mRNA, partial sequence	sp|Q9SX68|RK18_ARATH	221	1e-57	50S ribosomal protein L18, chloroplastic OS=Arabidopsis thaliana GN=RPL18 PE=1 SV=1	GO:0051604//protein maturation;GO:0010228//vegetative to reproductive phase transition of meristem	GO:0004596//peptide alpha-N-acetyltransferase activity	GO:0016023//cytoplasmic membrane-bounded vesicle
gi|532782028|gb|GAHT01036239.1|	Signal Transdcution	CL4298.Contig2_All	0	0	0.0154	0.999884	gi|533071888|gb|GAHU01037078.1|	0.3058	0.0009	0.003	0	gi|225454688|ref|XP_002270494.1|	822.8	0	PREDICTED: GPCR-type G protein 1 [Vitis vinifera] >gi|297737266|emb|CBI26467.3| unnamed protein product [Vitis vinifera]	PREDICTED: Vitis vinifera GPCR-type G protein 1-like (LOC100254630), mRNA	GPCR-type G protein 1 OS=Arabidopsis thaliana GN=GTG1 PE=1 SV=1	gi|225454687|ref|XM_002270458.1|	613	1e-172	PREDICTED: Vitis vinifera GPCR-type G protein 1-like (LOC100254630), mRNA	sp|Q9XIP7|GTG1_ARATH	776	0	GPCR-type G protein 1 OS=Arabidopsis thaliana GN=GTG1 PE=1 SV=1	GO:0009737//response to abscisic acid stimulus;GO:0010228//vegetative to reproductive phase transition of meristem	GO:0005525//GTP binding;GO:0051020//GTPase binding;GO:0010427//abscisic acid binding	GO:0005794//Golgi apparatus;GO:0005886//plasma membrane;GO:0009507//chloroplast
gi|532798293|gb|GAHT01021309.1|	Protein Destination and Storage	Unigene36356_All	0	0	0.0276	0.999887	gi|533082666|gb|GAHU01026300.1|	0	0	0.0137	0	gi|42565507|gb|AAS21018.1|	287.7	1e-76	autophagy protein AGP6 [Hyacinthus orientalis]	Hyacinthus orientalis autophagy protein AGP6 mRNA, partial cds	Vacuolar protein-sorting-associated protein 37 homolog 1 OS=Arabidopsis thaliana GN=VPS37-1 PE=1 SV=1	gi|42565506|gb|AY389767.1|	385	1e-104	Hyacinthus orientalis autophagy protein AGP6 mRNA, partial cds	sp|Q9SCP9|VP371_ARATH	241	6e-64	Vacuolar protein-sorting-associated protein 37 homolog 1 OS=Arabidopsis thaliana GN=VPS37-1 PE=1 SV=1	-	-	GO:0009536//plastid
gi|532810231|gb|GAHT01010430.1|	Disease/defense	CL14154.Contig2_All	0	0	0.0209	0.999893	gi|533108790|gb|GAHU01000176.1|	0	0	0.0386	0	gi|225444515|ref|XP_002274769.1|	184.1	4e-46	PREDICTED: peroxidase 42 isoform 1 [Vitis vinifera] >gi|147768417|emb|CAN60224.1| hypothetical protein VITISV_039918 [Vitis vinifera]	Glycine max peroxidase (PRX2B), mRNA	Peroxidase 42 OS=Arabidopsis thaliana GN=PER42 PE=1 SV=2	gi|402744273|ref|NM_001251254.2|	168	2e-39	Glycine max peroxidase (PRX2B), mRNA	sp|Q9SB81|PER42_ARATH	163	2e-41	Peroxidase 42 OS=Arabidopsis thaliana GN=PER42 PE=1 SV=2	GO:0055114//oxidation-reduction process;GO:0006979//response to oxidative stress	GO:0020037//heme binding;GO:0046872//metal ion binding;GO:0004601//peroxidase activity	-
gi|532806254|gb|GAHT01013348.1|	Transcription	CL13731.Contig1_All	0	0	0.037	0.999902	gi|533059188|gb|GAHU01049778.1|	0	0	0.018	0	gi|326521284|dbj|BAJ96845.1|	248.1	6e-65	predicted protein [Hordeum vulgare subsp. vulgare]	PREDICTED: Vitis vinifera FK506-binding protein 2-1-like (LOC100245185), mRNA	Peptidyl-prolyl cis-trans isomerase FKBP15-1 OS=Arabidopsis thaliana GN=FKBP15-1 PE=1 SV=2	gi|359496125|ref|XM_002271020.2|	186	2e-44	PREDICTED: Vitis vinifera FK506-binding protein 2-1-like (LOC100245185), mRNA	sp|Q38935|FK151_ARATH	228	1e-60	Peptidyl-prolyl cis-trans isomerase FKBP15-1 OS=Arabidopsis thaliana GN=FKBP15-1 PE=1 SV=2	GO:0006457//protein folding;GO:0000413//protein peptidyl-prolyl isomerization	GO:0003755//peptidyl-prolyl cis-trans isomerase activity	GO:0005773//vacuole;GO:0016023//cytoplasmic membrane-bounded vesicle
gi|532803840|gb|GAHT01015762.1|	Energy	CL19901.Contig2_All	0	0	0.0196	0.999904	gi|533026148|gb|GAHU01072327.1|	0.1911	0.0678	0.3551	0	gi|2497543|sp|Q42954.1|KPYC_TOBAC	481.9	7e-135	RecName: Full=Pyruvate kinase, cytosolic isozyme; Short=PK >gi|444023|emb|CAA82628.1| pyruvate kinase [Nicotiana tabacum]	Vitis vinifera contig VV78X174645.7, whole genome shotgun sequence	Pyruvate kinase, cytosolic isozyme OS=Nicotiana tabacum PE=2 SV=1	gi|147821579|emb|AM455134.2|	220	2e-54	Vitis vinifera contig VV78X174645.7, whole genome shotgun sequence	sp|Q42954|KPYC_TOBAC	481	2e-136	Pyruvate kinase, cytosolic isozyme OS=Nicotiana tabacum PE=2 SV=1	GO:0010498//proteasomal protein catabolic process;GO:0007010//cytoskeleton organization;GO:0006096//glycolysis;GO:0016310//phosphorylation;GO:0006094//gluconeogenesis;GO:0006865//amino acid transport	GO:0030955//potassium ion binding;GO:0004743//pyruvate kinase activity;GO:0000287//magnesium ion binding	GO:0005829//cytosol;GO:0005739//mitochondrion
gi|532745090|gb|GAHT01072280.1|	Unclassified	Unigene9497_All	0	0	0.0237	0.999908	gi|532843929|gb|GAHU01173986.1|	0.6654	0.112	0.1682	0	#N/A	#N/A	#N/A	#N/A	#N/A	#N/A	#N/A	#N/A	#N/A	#N/A	#N/A	#N/A	#N/A	#N/A	#N/A	#N/A	#N/A
gi|532758412|gb|GAHT01058960.1|	Cell growth/division	CL7975.Contig1_All	0	0	0.0051	0.999909	gi|533046066|gb|GAHU01061500.1|	0.0782	0.0005	0.0067	0	gi|297736029|emb|CBI24067.3|	812	0	unnamed protein product [Vitis vinifera]	PREDICTED: Vitis vinifera microtubule-associated protein SPIRAL2-like (LOC100253606), mRNA	Microtubule-associated protein TORTIFOLIA1 OS=Arabidopsis thaliana GN=TOR1 PE=1 SV=2	gi|225445649|ref|XM_002266022.1|	77.8	6e-11	PREDICTED: Vitis vinifera microtubule-associated protein SPIRAL2-like (LOC100253606), mRNA	sp|Q9T041|MAPT_ARATH	305	1e-82	Microtubule-associated protein TORTIFOLIA1 OS=Arabidopsis thaliana GN=TOR1 PE=1 SV=2	GO:0006342//chromatin silencing;GO:0034968//histone lysine methylation;GO:0006260//DNA replication	-	-
gi|532781328|gb|GAHT01036939.1|	Transcription	Unigene26868_All	0	0	0.0108	0.999912	gi|533069704|gb|GAHU01039262.1|	0	0	0.0045	0	gi|255587133|ref|XP_002534151.1|	523.5	3e-147	RNA 3&apos; terminal phosphate cyclase, putative [Ricinus communis] >gi|223525786|gb|EEF28234.1| RNA 3&apos; terminal phosphate cyclase, putative [Ricinus communis]	PREDICTED: Vitis vinifera probable RNA 3'-terminal phosphate cyclase-like protein (LOC100247518), mRNA	Probable RNA 3'-terminal phosphate cyclase-like protein OS=Arabidopsis thaliana GN=At5g22100 PE=2 SV=1	gi|359488783|ref|XM_002282339.2|	105	1e-19	PREDICTED: Vitis vinifera probable RNA 3'-terminal phosphate cyclase-like protein (LOC100247518), mRNA	sp|Q9C578|RCL1_ARATH	471	7e-133	Probable RNA 3'-terminal phosphate cyclase-like protein OS=Arabidopsis thaliana GN=At5g22100 PE=2 SV=1	GO:0042254//ribosome biogenesis;GO:0006396//RNA processing	GO:0003963//RNA-3'-phosphate cyclase activity	GO:0005730//nucleolus;GO:0005739//mitochondrion
gi|532803701|gb|GAHT01015901.1|	Cell growth/division	Unigene6094_All	0	0	0.0214	0.999913	gi|533085206|gb|GAHU01023760.1|	0	0	0.0069	0	gi|15235981|ref|NP_193450.1|	398.3	6e-110	RAB GTPase homolog B1C [Arabidopsis thaliana] >gi|75279776|sp|P92963.1|RAB1C_ARATH RecName: Full=Ras-related protein RABB1c; Short=AtRABB1c; AltName: Full=Ras-related protein Rab2A; Short=AtRab2A >gi|1765896|emb|CAA70498.1| Rab2-like protein [Arabidopsis thaliana] >gi|5281023|emb|CAB45962.1| GTP-binding RAB2A like protein [Arabidopsis thaliana] >gi|7268468|emb|CAB80988.1| GTP-binding RAB2A like p…	PREDICTED: Vitis vinifera ras-related protein RABB1c-like (LOC100263184), mRNA	Ras-related protein RABB1c OS=Arabidopsis thaliana GN=RABB1C PE=2 SV=1	gi|359485785|ref|XM_002263254.2|	420	1e-115	PREDICTED: Vitis vinifera ras-related protein RABB1c-like (LOC100263184), mRNA	sp|P92963|RAB1C_ARATH	398	2e-111	Ras-related protein RABB1c OS=Arabidopsis thaliana GN=RABB1C PE=2 SV=1	GO:0016049//cell growth;GO:0006623//protein targeting to vacuole;GO:0007264//small GTPase mediated signal transduction;GO:0000902//cell morphogenesis;GO:0006944//cellular membrane fusion;GO:0006888//ER to Golgi vesicle-mediated transport	GO:0003924//GTPase activity;GO:0005525//GTP binding	GO:0033116//endoplasmic reticulum-Golgi intermediate compartment membrane;GO:0005773//vacuole;GO:0005794//Golgi apparatus;GO:0005886//plasma membrane
gi|532778775|gb|GAHT01039492.1|	Unclassified	Unigene14665_All	0.0157	0.0025	0.1582	0.999914	gi|533056134|gb|GAHU01052586.1|	0	0	0	0	gi|327505561|gb|AEA92308.1|	375.9	4e-103	Rab4 [Hevea brasiliensis]	Vitis vinifera clone SS0AEB3YG22	Ras-related protein RABD1 OS=Arabidopsis thaliana GN=RABD1 PE=1 SV=1	gi|349707520|emb|FQ385084.1|	456	1e-125	Vitis vinifera clone SS0AEB3YG22	sp|Q9ZRE2|RABD1_ARATH	346	1e-95	Ras-related protein RABD1 OS=Arabidopsis thaliana GN=RABD1 PE=1 SV=1	GO:0007264//small GTPase mediated signal transduction;GO:0006888//ER to Golgi vesicle-mediated transport;GO:0015031//protein transport	GO:0080115//myosin XI tail binding;GO:0030742//GTP-dependent protein binding;GO:0016787//hydrolase activity;GO:0005525//GTP binding	GO:0000139//Golgi membrane;GO:0016023//cytoplasmic membrane-bounded vesicle;GO:0032588//trans-Golgi network membrane;GO:0005886//plasma membrane
gi|532758534|gb|GAHT01058838.1|	Protein Destination and Storage	CL1712.Contig2_All	0.1109	0.0148	0.1335	0.999931	gi|533036062|gb|GAHU01067658.1|	0.3198	0.0025	0.0077	0	gi|297610753|ref|NP_001065018.2|	800.4	0	Os10g0507800 [Oryza sativa Japonica Group] >gi|255679542|dbj|BAF26932.2| Os10g0507800, partial [Oryza sativa Japonica Group]	Oryza sativa Japonica Group Os10g0507800 (Os10g0507800) mRNA, partial cds	Chaperone protein dnaJ 13 OS=Arabidopsis thaliana GN=ATJ13 PE=1 SV=2	gi|115482849|ref|NM_001071553.1|	133	8e-28	Oryza sativa Japonica Group Os10g0507800 (Os10g0507800) mRNA, partial cds	sp|Q39079|DNJ13_ARATH	700	0	Chaperone protein dnaJ 13 OS=Arabidopsis thaliana GN=ATJ13 PE=1 SV=2	GO:0006457//protein folding;GO:0009644//response to high light intensity;GO:0055122//response to very low light intensity stimulus;GO:0010228//vegetative to reproductive phase transition of meristem	GO:0031072//heat shock protein binding;GO:0051082//unfolded protein binding	GO:0009507//chloroplast
gi|532776303|gb|GAHT01041964.1|	Signal Transdcution	CL16117.Contig2_All	0	0	0.0104	0.999934	gi|533092453|gb|GAHU01016513.1|	0	0	0	0	gi|351727885|ref|NP_001237176.1|	223	3e-57	uncharacterized protein LOC100306589 [Glycine max]	PREDICTED: Vitis vinifera histidine-containing phosphotransfer protein 1-like, transcript variant 1 (LOC100251055), mRNA	Histidine-containing phosphotransfer protein 1 OS=Arabidopsis thaliana GN=AHP1 PE=1 SV=1	gi|359477451|ref|XM_002278375.2|	135	7e-29	PREDICTED: Vitis vinifera histidine-containing phosphotransfer protein 1-like, transcript variant 1 (LOC100251055), mRNA	sp|Q9ZNV9|AHP1_ARATH	203	7e-53	Histidine-containing phosphotransfer protein 1 OS=Arabidopsis thaliana GN=AHP1 PE=1 SV=1	GO:0009553//embryo sac development;GO:0000160//two-component signal transduction system (phosphorelay);GO:0080036//regulation of cytokinin mediated signaling pathway;GO:0016049//cell growth;GO:0055114//oxidation-reduction process;GO:0051301//cell division	GO:0009927//histidine phosphotransfer kinase activity;GO:0032440//2-alkenal reductase [NAD(P)] activity	GO:0005634//nucleus
gi|532814855|gb|GAHT01006069.1|	Protein Destination and Storage	CL14830.Contig2_All	0.0293	0.0059	0.2007	0.999937	gi|533101168|gb|GAHU01007798.1|	0	0	0	0	gi|356532139|ref|XP_003534631.1|	309.3	3e-83	PREDICTED: ubiquitin-conjugating enzyme E2 28-like isoform 1 [Glycine max] >gi|388506176|gb|AFK41154.1| unknown [Lotus japonicus]	Oryza sativa (indica cultivar-group) cDNA clone:OSIGCPI013A21, full insert sequence	Ubiquitin-conjugating enzyme E2 8 OS=Arabidopsis thaliana GN=UBC8 PE=1 SV=1	gi|116636366|emb|CT834698.1|	311	5e-82	Oryza sativa (indica cultivar-group) cDNA clone:OSIGCPI013A21, full insert sequence	sp|P35131|UBC8_ARATH	305	2e-83	Ubiquitin-conjugating enzyme E2 8 OS=Arabidopsis thaliana GN=UBC8 PE=1 SV=1	GO:0051788//response to misfolded protein;GO:0006635//fatty acid beta-oxidation;GO:0043161//proteasomal ubiquitin-dependent protein catabolic process;GO:0006944//cellular membrane fusion;GO:0016558//protein import into peroxisome matrix;GO:0051510//regulation of unidimensional cell growth;GO:0048193//Golgi vesicle transport;GO:0042023//DNA endoreduplication;GO:0016567//protein ubiquitination;GO:0…	GO:0004842//ubiquitin-protein ligase activity;GO:0005524//ATP binding	GO:0005737//cytoplasm;GO:0005886//plasma membrane;GO:0005634//nucleus
gi|532817262|gb|GAHT01003662.1|	Transcription	Unigene65896_All	0	0	0	0.999938	gi|533100160|gb|GAHU01008806.1|	0	0	0.0084	0	gi|255557631|ref|XP_002519845.1|	238	2e-62	glycine cleavage system h protein, putative [Ricinus communis] >gi|223540891|gb|EEF42449.1| glycine cleavage system h protein, putative [Ricinus communis]	Medicago truncatula Glycine cleavage system H protein (MTR_5g014260) mRNA, complete cds	Probable glycine cleavage system H protein 2, mitochondrial OS=Arabidopsis thaliana GN=At1g32470 PE=1 SV=1	gi|357482358|ref|XM_003611417.1|	145	4e-32	Medicago truncatula Glycine cleavage system H protein (MTR_5g014260) mRNA, complete cds	sp|Q9LQL0|GCSH2_ARATH	229	3e-61	Probable glycine cleavage system H protein 2, mitochondrial OS=Arabidopsis thaliana GN=At1g32470 PE=1 SV=1	GO:0010103//stomatal complex morphogenesis;GO:0019464//glycine decarboxylation via glycine cleavage system;GO:0006098//pentose-phosphate shunt;GO:0006364//rRNA processing;GO:0009657//plastid organization;GO:0010207//photosystem II assembly;GO:0019344//cysteine biosynthetic process	GO:0004047//aminomethyltransferase activity;GO:0004375//glycine dehydrogenase (decarboxylating) activity	GO:0005960//glycine cleavage complex;GO:0005739//mitochondrion;GO:0009579//thylakoid;GO:0009507//chloroplast;GO:0005634//nucleus
gi|532820741|gb|GAHT01000183.1|	Primary Metabolism	CL1804.Contig1_All	0.0468	0.0092	0.1966	0.99994	gi|533108250|gb|GAHU01000716.1|	0	0	0	0	gi|25901033|dbj|BAC41250.1|	331.3	1e-89	vacuolar proton-inorganic pyrophosphatase [Pyrus communis]	Oryza sativa Japonica Group Os02g0184200 (Os02g0184200) mRNA, partial cds	Pyrophosphate-energized vacuolar membrane proton pump 1 OS=Arabidopsis thaliana GN=AVP1 PE=1 SV=1	gi|297598706|ref|NM_001052642.2|	416	1e-113	Oryza sativa Japonica Group Os02g0184200 (Os02g0184200) mRNA, partial cds	sp|P31414|AVP1_ARATH	320	1e-87	Pyrophosphate-energized vacuolar membrane proton pump 1 OS=Arabidopsis thaliana GN=AVP1 PE=1 SV=1	GO:0006814//sodium ion transport;GO:0055114//oxidation-reduction process;GO:0009414//response to water deprivation;GO:0009651//response to salt stress;GO:0009926//auxin polar transport;GO:0048366//leaf development;GO:0015992//proton transport	GO:0030955//potassium ion binding;GO:0000287//magnesium ion binding;GO:0004427//inorganic diphosphatase activity;GO:0032440//2-alkenal reductase [NAD(P)] activity;GO:0009678//hydrogen-translocating pyrophosphatase activity	GO:0005739//mitochondrion;GO:0009941//chloroplast envelope;GO:0009705//plant-type vacuole membrane;GO:0016023//cytoplasmic membrane-bounded vesicle;GO:0010008//endosome membrane;GO:0005887//integral to plasma membrane
gi|532805783|gb|GAHT01013819.1|	Signal Transdcution	CL3617.Contig1_All	0.0893	0.015	0.1685	0.999952	gi|533089712|gb|GAHU01019254.1|	0	0	0	0	gi|224141283|ref|XP_002324004.1|	306.6	2e-82	predicted protein [Populus trichocarpa] >gi|222867006|gb|EEF04137.1| predicted protein [Populus trichocarpa]	PREDICTED: Vitis vinifera universal stress protein A-like protein (LOC100252494), mRNA	Universal stress protein A-like protein OS=Arabidopsis thaliana GN=At3g01520 PE=1 SV=2	gi|359488693|ref|XM_002277313.2|	123	3e-25	PREDICTED: Vitis vinifera universal stress protein A-like protein (LOC100252494), mRNA	sp|Q8LGG8|USPAL_ARATH	268	3e-72	Universal stress protein A-like protein OS=Arabidopsis thaliana GN=At3g01520 PE=1 SV=2	GO:0006950//response to stress;GO:0002238//response to molecule of fungal origin	-	GO:0005737//cytoplasm;GO:0005886//plasma membrane
gi|532800085|gb|GAHT01019517.1|	Unclassified	CL12612.Contig1_All	0.1019	0.0228	0.2234	0.999955	gi|533085949|gb|GAHU01023017.1|	0.3268	0.002	0.0062	0	gi|224105811|ref|XP_002313939.1|	368.2	1e-100	predicted protein [Populus trichocarpa] >gi|118483865|gb|ABK93823.1| unknown [Populus trichocarpa] >gi|222850347|gb|EEE87894.1| predicted protein [Populus trichocarpa]	Solanum lycopersicum strain Heinz 1706 chromosome 10 clone hba-11d15 map 10, complete sequence	Uncharacterized protein At3g49720 OS=Arabidopsis thaliana GN=At3g49720 PE=1 SV=1	gi|364503201|gb|AC244037.7|	95.6	1e-16	Solanum lycopersicum strain Heinz 1706 chromosome 10 clone hba-11d15 map 10, complete sequence	sp|Q9M2Y6|Y3972_ARATH	346	2e-95	Uncharacterized protein At3g49720 OS=Arabidopsis thaliana GN=At3g49720 PE=1 SV=1	GO:0010394//homogalacturonan metabolic process;GO:0045488//pectin metabolic process	-	GO:0000139//Golgi membrane;GO:0005768//endosome;GO:0005886//plasma membrane;GO:0005774//vacuolar membrane;GO:0005802//trans-Golgi network;GO:0009535//chloroplast thylakoid membrane
gi|532816149|gb|GAHT01004775.1|	Primary Metabolism	CL16194.Contig2_All	0.1084	0.0249	0.2295	0.999956	gi|533099813|gb|GAHU01009153.1|	0	0	0	0	gi|242065108|ref|XP_002453843.1|	308.5	9e-83	hypothetical protein SORBIDRAFT_04g019560 [Sorghum bicolor] >gi|241933674|gb|EES06819.1| hypothetical protein SORBIDRAFT_04g019560 [Sorghum bicolor]	Zea mays full-length cDNA clone ZM_BFb0036O02 mRNA, complete cds	Probable UDP-N-acetylglucosamine--peptide N-acetylglucosaminyltransferase SEC OS=Arabidopsis thaliana GN=SEC PE=2 SV=1	gi|224028912|gb|BT066635.1|	115	9e-23	Zea mays full-length cDNA clone ZM_BFb0036O02 mRNA, complete cds	sp|Q9M8Y0|SEC_ARATH	287	6e-78	Probable UDP-N-acetylglucosamine--peptide N-acetylglucosaminyltransferase SEC OS=Arabidopsis thaliana GN=SEC PE=2 SV=1	GO:0006493//protein O-linked glycosylation	GO:0016757//transferase activity, transferring glycosyl groups	GO:0005634//nucleus
gi|532775923|gb|GAHT01042344.1|	Unclassified	CL16407.Contig2_All	0.0454	0.005	0.11	0.99996	gi|533049038|gb|GAHU01058528.1|	0	0	0.0233	0	gi|225460728|ref|XP_002271955.1|	434.1	2e-120	PREDICTED: uncharacterized membrane protein At4g09580 [Vitis vinifera] >gi|296081147|emb|CBI18173.3| unnamed protein product [Vitis vinifera]	PREDICTED: Vitis vinifera uncharacterized LOC100252172 (LOC100252172), mRNA	Uncharacterized membrane protein At4g09580 OS=Arabidopsis thaliana GN=At4g09580 PE=1 SV=1	gi|225460727|ref|XM_002271919.1|	327	2e-86	PREDICTED: Vitis vinifera uncharacterized LOC100252172 (LOC100252172), mRNA	sp|Q8L586|Y4958_ARATH	405	4e-113	Uncharacterized membrane protein At4g09580 OS=Arabidopsis thaliana GN=At4g09580 PE=1 SV=1	-	-	GO:0005794//Golgi apparatus;GO:0016020//membrane;GO:0005783//endoplasmic reticulum
gi|532781707|gb|GAHT01036560.1|	Unclassified	CL2550.Contig1_All	0.089	0.0071	0.0797	0.999963	gi|533081781|gb|GAHU01027185.1|	0.4221	0.0057	0.0134	0	gi|357149719|ref|XP_003575209.1|	434.9	1e-120	PREDICTED: uncharacterized protein LOC100834638 [Brachypodium distachyon]	Oryza sativa Japonica Group Os04g0455600 (Os04g0455600) mRNA, complete cds	--	gi|115458723|ref|NM_001059497.1|	113	5e-22	Oryza sativa Japonica Group Os04g0455600 (Os04g0455600) mRNA, complete cds	--	--	--	--	-	-	GO:0005737//cytoplasm;GO:0005634//nucleus
gi|532806316|gb|GAHT01013286.1|	Unclassified	CL5384.Contig3_All	0.0427	0.0041	0.095	0.999963	gi|533087965|gb|GAHU01021001.1|	0.1305	0.1978	1.5156	0	gi|226532614|ref|NP_001149604.1|	366.3	5e-100	LOC100283230 [Zea mays] >gi|195628412|gb|ACG36036.1| ras-related protein Rab11D [Zea mays]	Phyllostachys edulis cDNA clone: bphyst002o16, full insert sequence	Ras-related protein Rab11D OS=Nicotiana tabacum GN=RAB11D PE=2 SV=1	gi|242374807|emb|FP101126.1|	307	1e-80	Phyllostachys edulis cDNA clone: bphyst002o16, full insert sequence	sp|Q40522|RB11D_TOBAC	356	2e-98	Ras-related protein Rab11D OS=Nicotiana tabacum GN=RAB11D PE=2 SV=1	GO:0032456//endocytic recycling;GO:0007264//small GTPase mediated signal transduction;GO:0015031//protein transport	GO:0005525//GTP binding;GO:0016787//hydrolase activity;GO:0019900//kinase binding	GO:0016023//cytoplasmic membrane-bounded vesicle;GO:0005886//plasma membrane
gi|532793570|gb|GAHT01024697.1|	Signal Transdcution	Unigene24639_All	0.1076	0.0146	0.1357	0.999964	gi|533084021|gb|GAHU01024945.1|	0.3131	0.0045	0.0142	0	gi|357124238|ref|XP_003563810.1|	473.4	2e-132	PREDICTED: serine/threonine-protein kinase HT1-like [Brachypodium distachyon]	Elaeis guineensis clone Eg-C6-191 kinase ATN1-like protein (ATN1K) mRNA, partial cds	Serine/threonine-protein kinase HT1 OS=Arabidopsis thaliana GN=HT1 PE=1 SV=1	gi|353441157|gb|JN003536.1|	476	1e-131	Elaeis guineensis clone Eg-C6-191 kinase ATN1-like protein (ATN1K) mRNA, partial cds	sp|Q2MHE4|HT1_ARATH	200	1e-51	Serine/threonine-protein kinase HT1 OS=Arabidopsis thaliana GN=HT1 PE=1 SV=1	GO:0006468//protein phosphorylation	GO:0004715//non-membrane spanning protein tyrosine kinase activity;GO:0004712//protein serine/threonine/tyrosine kinase activity;GO:0005524//ATP binding;GO:0004674//protein serine/threonine kinase activity	GO:0005737//cytoplasm
gi|532814083|gb|GAHT01006841.1|	Protein Synthesis	CL4129.Contig2_All	0.0586	0.012	0.2055	0.999968	gi|533092922|gb|GAHU01016044.1|	0	0	0.0099	0	gi|225448536|ref|XP_002276751.1|	402.5	2e-111	PREDICTED: eukaryotic translation initiation factor 2 subunit alpha [Vitis vinifera]	Phyllostachys edulis cDNA clone: bphylf058k08, full insert sequence	--	gi|242388563|emb|FP095024.1|	232	4e-58	Phyllostachys edulis cDNA clone: bphylf058k08, full insert sequence	--	--	--	--	GO:0006413//translational initiation;GO:0009165//nucleotide biosynthetic process	GO:0003743//translation initiation factor activity	GO:0005850//eukaryotic translation initiation factor 2 complex;GO:0009507//chloroplast;GO:0005634//nucleus;GO:0005829//cytosol
gi|532752622|gb|GAHT01064748.1|	Unclassified	CL7441.Contig2_All	0.4533	0.0072	0.0159	0.999969	gi|533021140|gb|GAHU01074680.1|	0	0	0	0	gi|225432898|ref|XP_002280151.1|	251.1	1e-65	PREDICTED: uncharacterized protein LOC100261325 [Vitis vinifera] >gi|297737157|emb|CBI26358.3| unnamed protein product [Vitis vinifera]	PREDICTED: Vitis vinifera uncharacterized LOC100261325 (LOC100261325), mRNA	--	gi|225432897|ref|XM_002280115.1|	65.9	6e-08	PREDICTED: Vitis vinifera uncharacterized LOC100261325 (LOC100261325), mRNA	--	--	--	--	-	-	-
gi|532787107|gb|GAHT01031160.1|	Unclassified	CL7922.Contig3_All	0.1516	0.014	0.0927	0.99997	gi|533059697|gb|GAHU01049269.1|	0.7404	0.0297	0.0401	0	gi|192912972|gb|ACF06594.1|	450.7	1e-125	short-chain dehydrogenase Tic32 [Elaeis guineensis]	PREDICTED: Vitis vinifera short-chain dehydrogenase TIC 32, chloroplastic-like (LOC100264493), mRNA	Short-chain dehydrogenase TIC 32, chloroplastic OS=Pisum sativum GN=TIC32 PE=1 SV=1	gi|359490489|ref|XM_002270068.2|	117	3e-23	PREDICTED: Vitis vinifera short-chain dehydrogenase TIC 32, chloroplastic-like (LOC100264493), mRNA	sp|Q6RVV4|TIC32_PEA	408	3e-114	Short-chain dehydrogenase TIC 32, chloroplastic OS=Pisum sativum GN=TIC32 PE=1 SV=1	GO:0055114//oxidation-reduction process	GO:0016630//protochlorophyllide reductase activity;GO:0000166//nucleotide binding	GO:0005739//mitochondrion
gi|532818725|gb|GAHT01002199.1|	Protein Synthesis	CL17166.Contig1_All	0.0262	0.0023	0.0871	0.99997	gi|533103784|gb|GAHU01005182.1|	0	0	0	0	gi|192910892|gb|ACF06554.1|	345.1	7e-94	ribosomal protein S7 [Elaeis guineensis]	Glycine max uncharacterized LOC100527680 (LOC100527680), mRNA	40S ribosomal protein S7 OS=Secale cereale GN=RPS7 PE=2 SV=1	gi|351727496|ref|NM_001248954.1|	357	1e-95	Glycine max uncharacterized LOC100527680 (LOC100527680), mRNA	sp|Q9XET4|RS7_SECCE	332	2e-91	40S ribosomal protein S7 OS=Secale cereale GN=RPS7 PE=2 SV=1	GO:0006412//translation	GO:0003735//structural constituent of ribosome	GO:0005730//nucleolus;GO:0022626//cytosolic ribosome;GO:0005886//plasma membrane;GO:0005618//cell wall;GO:0009507//chloroplast
gi|532769912|gb|GAHT01048355.1|	Unclassified	CL10826.Contig1_All	0.3112	0.0038	0.0123	0.999971	gi|533070831|gb|GAHU01038135.1|	0	0	0.0084	0	gi|224128994|ref|XP_002320474.1|	165.2	3e-40	predicted protein [Populus trichocarpa] >gi|222861247|gb|EEE98789.1| predicted protein [Populus trichocarpa]	--	--	--	--	--	--	--	--	--	--	-	-	GO:0005794//Golgi apparatus
gi|532811534|gb|GAHT01009390.1|	Protein Destination and Storage	CL3621.Contig2_All	0.0424	0.0035	0.0817	0.999973	gi|533093306|gb|GAHU01015660.1|	0.0403	0.0014	0.0344	0	gi|359487017|ref|XP_002263912.2|	1639.8	0	PREDICTED: ubiquitin carboxyl-terminal hydrolase 12-like [Vitis vinifera] >gi|296084432|emb|CBI24991.3| unnamed protein product [Vitis vinifera]	PREDICTED: Vitis vinifera ubiquitin carboxyl-terminal hydrolase 12-like (LOC100266796), mRNA	Ubiquitin carboxyl-terminal hydrolase 12 OS=Arabidopsis thaliana GN=UBP12 PE=1 SV=2	gi|225436094|ref|XM_002277664.1|	1195	0	PREDICTED: Vitis vinifera ubiquitin carboxyl-terminal hydrolase 12-like (LOC100266796), mRNA	sp|Q9FPT1|UBP12_ARATH	1550	0	Ubiquitin carboxyl-terminal hydrolase 12 OS=Arabidopsis thaliana GN=UBP12 PE=1 SV=2	GO:0006511//ubiquitin-dependent protein catabolic process	GO:0004221//ubiquitin thiolesterase activity	-
gi|532805700|gb|GAHT01013902.1|	Cell growth/division	CL3762.Contig5_All	0.0282	0.0014	0.0486	0.999973	gi|533097229|gb|GAHU01011737.1|	0	0	0.0047	0	gi|225435710|ref|XP_002285694.1|	651.7	0	PREDICTED: serine/threonine-protein phosphatase PP2A catalytic subunit [Vitis vinifera] >gi|147805851|emb|CAN78260.1| hypothetical protein VITISV_016121 [Vitis vinifera] >gi|297746443|emb|CBI16499.3| unnamed protein product [Vitis vinifera]	PREDICTED: Glycine max serine/threonine-protein phosphatase PP2A catalytic subunit-like (LOC100775812), mRNA	Serine/threonine-protein phosphatase PP2A catalytic subunit OS=Nicotiana tabacum PE=2 SV=1	gi|356572658|ref|XM_003554436.1|	783	0	PREDICTED: Glycine max serine/threonine-protein phosphatase PP2A catalytic subunit-like (LOC100775812), mRNA	sp|Q9XGH7|PP2A_TOBAC	627	6e-180	Serine/threonine-protein phosphatase PP2A catalytic subunit OS=Nicotiana tabacum PE=2 SV=1	GO:0006470//protein dephosphorylation	GO:0004722//protein serine/threonine phosphatase activity	GO:0005730//nucleolus;GO:0005886//plasma membrane;GO:0000159//protein phosphatase type 2A complex;GO:0005829//cytosol
gi|532807066|gb|GAHT01012540.1|	Cell growth/division	CL2112.Contig2_All	0.1682	0.0111	0.066	0.999974	gi|533076948|gb|GAHU01032018.1|	0.1767	0.0131	0.0744	0	gi|242086863|ref|XP_002439264.1|	1469.1	0	hypothetical protein SORBIDRAFT_09g003440 [Sorghum bicolor] >gi|241944549|gb|EES17694.1| hypothetical protein SORBIDRAFT_09g003440 [Sorghum bicolor]	PREDICTED: Vitis vinifera serine/threonine-protein phosphatase BSL1-like (LOC100249353), mRNA	Serine/threonine-protein phosphatase BSL1 homolog OS=Oryza sativa subsp. japonica GN=BSL1 PE=2 SV=1	gi|359479774|ref|XM_002270602.2|	710	0	PREDICTED: Vitis vinifera serine/threonine-protein phosphatase BSL1-like (LOC100249353), mRNA	sp|Q60EX6|BSL1_ORYSJ	1455	0	Serine/threonine-protein phosphatase BSL1 homolog OS=Oryza sativa subsp. japonica GN=BSL1 PE=2 SV=1	GO:0032880//regulation of protein localization;GO:0009742//brassinosteroid mediated signaling pathway	GO:0030145//manganese ion binding;GO:0004722//protein serine/threonine phosphatase activity;GO:0005506//iron ion binding;GO:0005515//protein binding	GO:0005886//plasma membrane;GO:0005634//nucleus;GO:0005829//cytosol
gi|532772439|gb|GAHT01045828.1|	Protein Destination and Storage	CL2593.Contig1_All	0.1099	0.0156	0.1423	0.999975	gi|533034858|gb|GAHU01068286.1|	0	0	0.0059	0	gi|224062379|ref|XP_002300825.1|	380.2	3e-104	predicted protein [Populus trichocarpa] >gi|222842551|gb|EEE80098.1| predicted protein [Populus trichocarpa]	PREDICTED: Brachypodium distachyon pentatricopeptide repeat-containing protein At5g61370, mitochondrial-like (LOC100846600), mRNA	--	gi|357131401|ref|XM_003567279.1|	123	5e-25	PREDICTED: Brachypodium distachyon pentatricopeptide repeat-containing protein At5g61370, mitochondrial-like (LOC100846600), mRNA	--	--	--	--	GO:0006468//protein phosphorylation;GO:0006626//protein targeting to mitochondrion	GO:0005524//ATP binding;GO:0004713//protein tyrosine kinase activity	GO:0005739//mitochondrion
gi|532785968|gb|GAHT01032299.1|	Unclassified	CL14102.Contig1_All	0.0862	0.0097	0.1126	0.999975	gi|533067740|gb|GAHU01041226.1|	0	0	0.0073	0	gi|242079395|ref|XP_002444466.1|	311.6	8e-84	hypothetical protein SORBIDRAFT_07g022290 [Sorghum bicolor] >gi|241940816|gb|EES13961.1| hypothetical protein SORBIDRAFT_07g022290 [Sorghum bicolor]	Oryza sativa Japonica Group Os08g0455800 (Os08g0455800) mRNA, complete cds	--	gi|115476733|ref|NM_001068498.1|	105	7e-20	Oryza sativa Japonica Group Os08g0455800 (Os08g0455800) mRNA, complete cds	--	--	--	--	-	-	GO:0005829//cytosol
gi|532789854|gb|GAHT01028413.1|	Transporter	CL7189.Contig2_All	0.1275	0.0202	0.1587	0.999976	gi|533081019|gb|GAHU01027947.1|	0.3218	0.0031	0.0095	0	gi|357126127|ref|XP_003564740.1|	559.3	6e-158	PREDICTED: magnesium transporter NIPA2-like [Brachypodium distachyon]	Phyllostachys edulis cDNA clone: bphylf030a15, full insert sequence	--	gi|242387454|emb|FP094313.1|	240	4e-60	Phyllostachys edulis cDNA clone: bphylf030a15, full insert sequence	--	--	--	--	-	-	GO:0016020//membrane
gi|532814644|gb|GAHT01006280.1|	Unclassified	Unigene7605_All	0.0183	0.003	0.1667	0.999978	gi|533092519|gb|GAHU01016447.1|	0	0	0.0302	0	#N/A	#N/A	#N/A	#N/A	#N/A	#N/A	#N/A	#N/A	#N/A	#N/A	#N/A	#N/A	#N/A	#N/A	#N/A	#N/A	#N/A
gi|532782631|gb|GAHT01035636.1|	Unclassified	CL5985.Contig1_All	0.2373	0.049	0.2065	0.999979	gi|533050067|gb|GAHU01057499.1|	0.0961	0.002	0.0213	0	gi|242056939|ref|XP_002457615.1|	265.4	6e-70	hypothetical protein SORBIDRAFT_03g010370 [Sorghum bicolor] >gi|241929590|gb|EES02735.1| hypothetical protein SORBIDRAFT_03g010370 [Sorghum bicolor]	--	--	--	--	--	--	--	--	--	--	GO:0048573//photoperiodism, flowering;GO:0006635//fatty acid beta-oxidation	-	GO:0005634//nucleus;GO:0005739//mitochondrion
gi|532775124|gb|GAHT01043143.1|	Transporter	CL8608.Contig2_All	0.0751	0.0153	0.2034	0.999979	gi|533092961|gb|GAHU01016005.1|	0	0	0.0213	0	gi|255558178|ref|XP_002520116.1|	590.1	2e-167	UDP-galactose transporter, putative [Ricinus communis] >gi|223540608|gb|EEF42171.1| UDP-galactose transporter, putative [Ricinus communis]	PREDICTED: Vitis vinifera UDP-galactose transporter 3-like (LOC100258453), mRNA	UDP-galactose/UDP-glucose transporter 3 OS=Arabidopsis thaliana GN=UTR3 PE=1 SV=1	gi|359473265|ref|XM_002277142.2|	268	1e-68	PREDICTED: Vitis vinifera UDP-galactose transporter 3-like (LOC100258453), mRNA	sp|Q9M9S6|UTR3_ARATH	571	3e-163	UDP-galactose/UDP-glucose transporter 3 OS=Arabidopsis thaliana GN=UTR3 PE=1 SV=1	GO:0015786//UDP-glucose transport;GO:0006457//protein folding;GO:0009553//embryo sac development;GO:0009408//response to heat;GO:0009627//systemic acquired resistance;GO:0009555//pollen development;GO:0030968//endoplasmic reticulum unfolded protein response;GO:0072334//UDP-galactose transmembrane transport;GO:0009644//response to high light intensity;GO:0042542//response to hydrogen peroxide	GO:0005460//UDP-glucose transmembrane transporter activity;GO:0005459//UDP-galactose transmembrane transporter activity	GO:0030176//integral to endoplasmic reticulum membrane;GO:0030173//integral to Golgi membrane;GO:0009507//chloroplast
gi|532785060|gb|GAHT01033207.1|	Secondary metabolism	CL18632.Contig3_All	0.0188	0.0017	0.0878	0.999982	gi|533079247|gb|GAHU01029719.1|	0.3961	0.0614	0.155	0	gi|363806722|ref|NP_001242526.1|	453.8	2e-126	uncharacterized protein LOC100807840 [Glycine max]	Elaeis oleifera cholinephosphate cytidylyltransferase (CCT) mRNA, partial cds	--	gi|226441626|gb|FJ789768.1|	434	1e-119	Elaeis oleifera cholinephosphate cytidylyltransferase (CCT) mRNA, partial cds	--	--	--	--	GO:0006657//CDP-choline pathway	GO:0004105//choline-phosphate cytidylyltransferase activity	GO:0005634//nucleus
gi|532816240|gb|GAHT01004684.1|	Unclassified	CL11131.Contig1_All	0.0407	0.0025	0.0604	0.999984	gi|533091181|gb|GAHU01017785.1|	0	0	0.0042	0	gi|115469406|ref|NP_001058302.1|	542	1e-152	Os06g0665000 [Oryza sativa Japonica Group] >gi|52076505|dbj|BAD45383.1| LEM3-like [Oryza sativa Japonica Group] >gi|113596342|dbj|BAF20216.1| Os06g0665000 [Oryza sativa Japonica Group]	Phyllostachys edulis cDNA clone: bphylf048m08, full insert sequence	ALA-interacting subunit 1 OS=Arabidopsis thaliana GN=ALIS1 PE=1 SV=1	gi|242389053|emb|FP100285.1|	182	8e-43	Phyllostachys edulis cDNA clone: bphylf048m08, full insert sequence	sp|Q9LTW0|ALIS1_ARATH	502	3e-142	ALA-interacting subunit 1 OS=Arabidopsis thaliana GN=ALIS1 PE=1 SV=1	GO:0035556//intracellular signal transduction;GO:0009723//response to ethylene stimulus;GO:0015914//phospholipid transport;GO:0009738//abscisic acid mediated signaling pathway;GO:0051301//cell division	-	GO:0005794//Golgi apparatus;GO:0005886//plasma membrane;GO:0009536//plastid
gi|532805568|gb|GAHT01014034.1|	Signal Transdcution	CL2815.Contig2_All	0.0771	0.0097	0.1262	0.999985	gi|533071644|gb|GAHU01037322.1|	0.0421	0.0114	0.2701	0	gi|47027065|gb|AAT08747.1|	272.7	4e-72	serine/threonine kinase [Hyacinthus orientalis]	Hyacinthus orientalis serine/threonine kinase mRNA, complete cds	Probable calcium-binding protein CML7 OS=Oryza sativa subsp. japonica GN=CML7 PE=2 SV=1	gi|47027064|gb|AY389673.1|	412	1e-112	Hyacinthus orientalis serine/threonine kinase mRNA, complete cds	sp|Q84VG0|CML7_ORYSJ	247	6e-66	Probable calcium-binding protein CML7 OS=Oryza sativa subsp. japonica GN=CML7 PE=2 SV=1	GO:0009409//response to cold;GO:0016310//phosphorylation;GO:0055114//oxidation-reduction process	GO:0016301//kinase activity;GO:0005509//calcium ion binding;GO:0032440//2-alkenal reductase [NAD(P)] activity	GO:0005886//plasma membrane;GO:0005634//nucleus;GO:0005829//cytosol
gi|532781432|gb|GAHT01036835.1|	Signal Transdcution	CL4395.Contig2_All	0.2368	0.0192	0.081	0.999986	gi|533058067|gb|GAHU01050653.1|	0.292	0.0024	0.0084	0	gi|356511889|ref|XP_003524654.1|	962.2	0	PREDICTED: diacylglycerol kinase 1-like [Glycine max]	PREDICTED: Vitis vinifera diacylglycerol kinase 1-like (LOC100255335), mRNA	Diacylglycerol kinase 1 OS=Arabidopsis thaliana GN=DGK1 PE=1 SV=2	gi|225457278|ref|XM_002281311.1|	214	4e-52	PREDICTED: Vitis vinifera diacylglycerol kinase 1-like (LOC100255335), mRNA	sp|Q39017|DGK1_ARATH	936	0	Diacylglycerol kinase 1 OS=Arabidopsis thaliana GN=DGK1 PE=1 SV=2	GO:0006944//cellular membrane fusion;GO:0035556//intracellular signal transduction;GO:0007205//protein kinase C-activating G-protein coupled receptor signaling pathway	GO:0005509//calcium ion binding;GO:0004143//diacylglycerol kinase activity	GO:0005737//cytoplasm
gi|532792013|gb|GAHT01026254.1|	Unclassified	Unigene24342_All	0.1092	0.0058	0.053	0.999986	gi|533078855|gb|GAHU01030111.1|	0.188	0.015	0.0795	0	gi|334351170|sp|Q0IQN5.2|RTOR1_ORYSJ	1401	0	RecName: Full=Regulatory-associated protein of TOR 1; AltName: Full=Protein RAPTOR 1; Short=OsRAPTOR1	PREDICTED: Brachypodium distachyon regulatory-associated protein of TOR 1-like (LOC100844309), mRNA	Regulatory-associated protein of TOR 1 OS=Oryza sativa subsp. japonica GN=RAPTOR1 PE=2 SV=2	gi|357155515|ref|XM_003577098.1|	753	0	PREDICTED: Brachypodium distachyon regulatory-associated protein of TOR 1-like (LOC100844309), mRNA	sp|Q0IQN5|RTOR1_ORYSJ	1400	0	Regulatory-associated protein of TOR 1 OS=Oryza sativa subsp. japonica GN=RAPTOR1 PE=2 SV=2	GO:0000911//cytokinesis by cell plate formation;GO:0045595//regulation of cell differentiation;GO:0016049//cell growth;GO:0010431//seed maturation;GO:0009880//embryonic pattern specification;GO:0010072//primary shoot apical meristem specification;GO:0010228//vegetative to reproductive phase transition of meristem;GO:0007062//sister chromatid cohesion;GO:0006487//protein N-linked glycosylation	GO:0005515//protein binding;GO:0000166//nucleotide binding	GO:0080008//Cul4-RING ubiquitin ligase complex
gi|532815549|gb|GAHT01005375.1|	Transporter	CL3191.Contig3_All	0.059	0.0519	0.8794	0.999986	gi|533102863|gb|GAHU01006103.1|	0	0	0	0	gi|255540887|ref|XP_002511508.1|	418.3	9e-116	H(\+)-transporting atpase plant/fungi plasma membrane type, putative [Ricinus communis] >gi|223550623|gb|EEF52110.1| H(\+)-transporting atpase plant/fungi plasma membrane type, putative [Ricinus communis]	Oryza sativa Japonica Group Os04g0656100 (Os04g0656100) mRNA, complete cds	ATPase 11, plasma membrane-type OS=Arabidopsis thaliana GN=AHA11 PE=1 SV=1	gi|115461035|ref|NM_001060653.1|	349	4e-93	Oryza sativa Japonica Group Os04g0656100 (Os04g0656100) mRNA, complete cds	sp|Q9LV11|PMA11_ARATH	414	5e-116	ATPase 11, plasma membrane-type OS=Arabidopsis thaliana GN=AHA11 PE=1 SV=1	GO:0015992//proton transport;GO:0007131//reciprocal meiotic recombination;GO:0045132//meiotic chromosome segregation;GO:0033044//regulation of chromosome organization;GO:0009651//response to salt stress;GO:0042138//meiotic DNA double-strand break formation;GO:0006754//ATP biosynthetic process;GO:0007129//synapsis;GO:0010382//cellular cell wall macromolecule metabolic process;GO:0006200//ATP catab…	GO:0008553//hydrogen-exporting ATPase activity, phosphorylative mechanism;GO:0046872//metal ion binding;GO:0005524//ATP binding	GO:0016021//integral to membrane;GO:0005886//plasma membrane
gi|532811958|gb|GAHT01008966.1|	Protein Destination and Storage	Unigene50256_All	0.0503	0.0079	0.1567	0.999986	gi|533077133|gb|GAHU01031833.1|	0	0	0	0	gi|242077356|ref|XP_002448614.1|	285	5e-76	hypothetical protein SORBIDRAFT_06g030160 [Sorghum bicolor] >gi|241939797|gb|EES12942.1| hypothetical protein SORBIDRAFT_06g030160 [Sorghum bicolor]	Oryza sativa (indica cultivar-group) clone OSS-481-539-D1 glutamyl-trna reductase 1 mRNA, partial cds	Glutamyl-tRNA reductase, chloroplastic OS=Oryza sativa subsp. japonica GN=Os10g0502400 PE=2 SV=1	gi|149392738|gb|EF576584.1|	198	5e-48	Oryza sativa (indica cultivar-group) clone OSS-481-539-D1 glutamyl-trna reductase 1 mRNA, partial cds	sp|P0C587|HEM1_ORYSJ	282	1e-76	Glutamyl-tRNA reductase, chloroplastic OS=Oryza sativa subsp. japonica GN=Os10g0502400 PE=2 SV=1	GO:0006783//heme biosynthetic process;GO:0006979//response to oxidative stress;GO:0015995//chlorophyll biosynthetic process;GO:0009416//response to light stimulus;GO:0055114//oxidation-reduction process	GO:0050661//NADP binding;GO:0008883//glutamyl-tRNA reductase activity	GO:0009536//plastid
gi|532796202|gb|GAHT01023046.1|	Secondary metabolism	CL6061.Contig2_All	0.1476	0.0071	0.048	0.999987	gi|533058936|gb|GAHU01050030.1|	0.3223	0.0009	0.0027	0	gi|27448224|gb|AAO13809.1|AF384110_1	750.7	0	phytochelatins synthase [Allium sativum]	Allium sativum phytochelatins synthase (pcs1) mRNA, complete cds	Glutathione gamma-glutamylcysteinyltransferase 1 OS=Lotus japonicus GN=PCS1 PE=2 SV=1	gi|27448223|gb|AF384110.1|	408	1e-111	Allium sativum phytochelatins synthase (pcs1) mRNA, complete cds	sp|Q2TSC7|PCS1_LOTJA	668	0	Glutathione gamma-glutamylcysteinyltransferase 1 OS=Lotus japonicus GN=PCS1 PE=2 SV=1	GO:0015700//arsenite transport;GO:0042742//defense response to bacterium;GO:0046938//phytochelatin biosynthetic process;GO:0071994;GO:0052544//defense response by callose deposition in cell wall;GO:0042344//indole glucosinolate catabolic process;GO:0046685//response to arsenic-containing substance;GO:0046686//response to cadmium ion	GO:0005507//copper ion binding;GO:0015446//arsenite-transmembrane transporting ATPase activity;GO:0071992//phytochelatin transmembrane transporter activity;GO:0016756//glutathione gamma-glutamylcysteinyltransferase activity;GO:0046870//cadmium ion binding	GO:0005829//cytosol
gi|532798285|gb|GAHT01021317.1|	Secondary metabolism	CL11018.Contig2_All	0.0788	0.0041	0.0519	0.999989	gi|533097748|gb|GAHU01011218.1|	0.6567	0.0023	0.0035	0	gi|297743953|emb|CBI36923.3|	552	8e-156	unnamed protein product [Vitis vinifera]	Solanum lycopersicum cDNA, clone: LEFL1096AB09, HTC in leaf	Phosphoribosylformylglycinamidine cyclo-ligase, chloroplastic/mitochondrial OS=Vigna unguiculata GN=PUR5 PE=2 SV=1	gi|225311923|dbj|AK319662.1|	325	7e-86	Solanum lycopersicum cDNA, clone: LEFL1096AB09, HTC in leaf	sp|P52424|PUR5_VIGUN	541	5e-154	Phosphoribosylformylglycinamidine cyclo-ligase, chloroplastic/mitochondrial OS=Vigna unguiculata GN=PUR5 PE=2 SV=1	GO:0006744//ubiquinone biosynthetic process;GO:0009220//pyrimidine ribonucleotide biosynthetic process;GO:0006189//'de novo' IMP biosynthetic process	GO:0005507//copper ion binding;GO:0005524//ATP binding;GO:0004641//phosphoribosylformylglycinamidine cyclo-ligase activity	GO:0005739//mitochondrion;GO:0009570//chloroplast stroma
gi|532786012|gb|GAHT01032255.1|	Cell Structure	CL6234.Contig1_All	0.0998	0.004	0.0403	0.99999	gi|533069904|gb|GAHU01039062.1|	0	0	0.0116	0	gi|224091182|ref|XP_002309201.1|	1091.6	0	predicted protein [Populus trichocarpa] >gi|222855177|gb|EEE92724.1| predicted protein [Populus trichocarpa]	PREDICTED: Vitis vinifera myosin-Vb-like (LOC100243893), mRNA	--	gi|359484293|ref|XM_002278992.2|	1070	0	PREDICTED: Vitis vinifera myosin-Vb-like (LOC100243893), mRNA	--	--	--	--	GO:0048768//root hair cell tip growth;GO:0060151//peroxisome localization;GO:0010154//fruit development;GO:0051301//cell division;GO:0009791//post-embryonic development;GO:0051646//mitochondrion localization;GO:0010091//trichome branching;GO:0051645//Golgi localization	GO:0042802//identical protein binding;GO:0005524//ATP binding;GO:0003774//motor activity;GO:0003779//actin binding	GO:0016459//myosin complex
gi|532768183|gb|GAHT01050084.1|	Unclassified	CL1993.Contig2_All	0.0271	0.0011	0.0397	0.999991	gi|533064025|gb|GAHU01044941.1|	0.0431	0.0011	0.0248	0	gi|225446987|ref|XP_002266264.1|	634.4	1e-180	PREDICTED: TBC1 domain family member 2A [Vitis vinifera] >gi|297739137|emb|CBI28788.3| unnamed protein product [Vitis vinifera]	PREDICTED: Vitis vinifera TBC1 domain family member 2A-like (LOC100261881), mRNA	--	gi|359485656|ref|XM_002266228.2|	252	1e-63	PREDICTED: Vitis vinifera TBC1 domain family member 2A-like (LOC100261881), mRNA	--	--	--	--	GO:0060151//peroxisome localization;GO:0051646//mitochondrion localization;GO:0051645//Golgi localization;GO:0030048//actin filament-based movement;GO:0032851//positive regulation of Rab GTPase activity	GO:0005097//Rab GTPase activator activity	GO:0005737//cytoplasm
gi|532733491|gb|GAHT01083315.1|	Cell growth/division	CL3064.Contig1_All	0.4087	0.0437	0.1069	0.999991	gi|533071854|gb|GAHU01037112.1|	0	0	0.0143	0	gi|255558462|ref|XP_002520256.1|	454.9	1e-126	protein phosphatase 2c, putative [Ricinus communis] >gi|223540475|gb|EEF42042.1| protein phosphatase 2c, putative [Ricinus communis]	Solanum lycopersicum cDNA, clone: LEFL1076DB07, HTC in leaf	Probable protein phosphatase 2C 11 OS=Arabidopsis thaliana GN=At1g43900 PE=2 SV=1	gi|225319982|dbj|AK324352.1|	244	2e-61	Solanum lycopersicum cDNA, clone: LEFL1076DB07, HTC in leaf	sp|Q8VZN9|P2C11_ARATH	411	5e-115	Probable protein phosphatase 2C 11 OS=Arabidopsis thaliana GN=At1g43900 PE=2 SV=1	GO:0006470//protein dephosphorylation;GO:0007264//small GTPase mediated signal transduction;GO:0015031//protein transport	GO:0046872//metal ion binding;GO:0005525//GTP binding;GO:0004722//protein serine/threonine phosphatase activity;GO:0004767//sphingomyelin phosphodiesterase activity	GO:0008287//protein serine/threonine phosphatase complex
gi|532803438|gb|GAHT01016164.1|	Primary Metabolism	CL536.Contig1_All	0.022	0.0005	0.024	0.999992	gi|533097807|gb|GAHU01011159.1|	0.3088	0.0102	0.033	0	gi|357116071|ref|XP_003559808.1|	1266.1	0	PREDICTED: acyl-CoA dehydrogenase family member 10-like [Brachypodium distachyon]	Zea mays uncharacterized LOC100502333 (LOC100502333), mRNA >gi|238014293|gb|BT087829.1| Zea mays full-length cDNA clone ZM_BFb0216C06 mRNA, complete cds	Isovaleryl-CoA dehydrogenase 1, mitochondrial OS=Solanum tuberosum GN=IVD1 PE=2 SV=1	gi|308080241|ref|NM_001196811.1|	420	1e-114	Zea mays uncharacterized LOC100502333 (LOC100502333), mRNA >gi|238014293|gb|BT087829.1| Zea mays full-length cDNA clone ZM_BFb0216C06 mRNA, complete cds	sp|Q9FS88|IVD1_SOLTU	99.4	1e-20	Isovaleryl-CoA dehydrogenase 1, mitochondrial OS=Solanum tuberosum GN=IVD1 PE=2 SV=1	GO:0048767//root hair elongation;GO:0009610//response to symbiotic fungus;GO:0055114//oxidation-reduction process	GO:0050660//flavin adenine dinucleotide binding;GO:0003995//acyl-CoA dehydrogenase activity;GO:0016772//transferase activity, transferring phosphorus-containing groups	GO:0005829//cytosol
gi|532765080|gb|GAHT01053187.1|	Signal Transdcution	CL8116.Contig3_All	0.8789	0.005	0.0056	0.999992	gi|533046538|gb|GAHU01061028.1|	0.2921	0.0016	0.0056	0	gi|115457822|ref|NP_001052511.1|	436.8	2e-121	Os04g0346000 [Oryza sativa Japonica Group] >gi|38346023|emb|CAE03962.2| OSJNBb0085H11.11 [Oryza sativa Japonica Group] >gi|113564082|dbj|BAF14425.1| Os04g0346000 [Oryza sativa Japonica Group]	Glycine max prolyl 4-hydroxylase subunit alpha-1-like (LOC100794585), mRNA	--	gi|363814556|ref|NM_001255825.1|	165	1e-37	Glycine max prolyl 4-hydroxylase subunit alpha-1-like (LOC100794585), mRNA	--	--	--	--	GO:0055114//oxidation-reduction process;GO:0018401//peptidyl-proline hydroxylation to 4-hydroxy-L-proline;GO:0006487//protein N-linked glycosylation	GO:0004656//procollagen-proline 4-dioxygenase activity;GO:0031418//L-ascorbic acid binding;GO:0005506//iron ion binding	GO:0005739//mitochondrion;GO:0005576//extracellular region;GO:0005794//Golgi apparatus
gi|532818501|gb|GAHT01002423.1|	Cell growth/division	CL12647.Contig3_All	0.0299	0.0048	0.1603	0.999992	gi|533097709|gb|GAHU01011257.1|	0	0	0.0244	0	gi|76160984|gb|ABA40455.1|	364.4	1e-99	ARF-like small GTPase-like protein [Solanum tuberosum] >gi|83283999|gb|ABC01907.1| ARF-like small GTPase-like protein [Solanum tuberosum]	Hyacinthus orientalis ADP-ribosylation factor (ARF) mRNA, complete cds	ADP-ribosylation factor 1 OS=Arabidopsis thaliana GN=ARF1 PE=1 SV=2	gi|47026875|gb|AY389566.1|	741	0	Hyacinthus orientalis ADP-ribosylation factor (ARF) mRNA, complete cds	sp|P36397|ARF1_ARATH	360	1e-99	ADP-ribosylation factor 1 OS=Arabidopsis thaliana GN=ARF1 PE=1 SV=2	GO:0007264//small GTPase mediated signal transduction;GO:0006471//protein ADP-ribosylation;GO:0006499//N-terminal protein myristoylation;GO:0006886//intracellular protein transport;GO:0046686//response to cadmium ion	GO:0005507//copper ion binding;GO:0016004//phospholipase activator activity;GO:0005215//transporter activity;GO:0005525//GTP binding	GO:0005829//cytosol;GO:0009506//plasmodesma;GO:0005773//vacuole;GO:0005798//Golgi-associated vesicle;GO:0005886//plasma membrane
gi|532790483|gb|GAHT01027784.1|	Unclassified	CL12012.Contig2_All	0.121	0.0052	0.0433	0.999993	gi|533086551|gb|GAHU01022415.1|	0.6	0.0015	0.0025	0	gi|326515300|dbj|BAK03563.1|	858.6	0	predicted protein [Hordeum vulgare subsp. vulgare]	Oryza sativa Japonica Group Os02g0294600 (Os02g0294600) mRNA, partial cds	Protein Mut11 OS=Chlamydomonas reinhardtii GN=Mut11 PE=2 SV=1	gi|297721090|ref|NM_001185979.1|	165	3e-37	Oryza sativa Japonica Group Os02g0294600 (Os02g0294600) mRNA, partial cds	sp|Q8W1K8|MUT11_CHLRE	92	1e-18	Protein Mut11 OS=Chlamydomonas reinhardtii GN=Mut11 PE=2 SV=1	GO:0009630//gravitropism;GO:0009888//tissue development;GO:0031048//chromatin silencing by small RNA;GO:0007131//reciprocal meiotic recombination;GO:0045492//xylan biosynthetic process;GO:0010638//positive regulation of organelle organization;GO:0045132//meiotic chromosome segregation;GO:0033044//regulation of chromosome organization;GO:0016926//protein desumoylation;GO:0042138//meiotic DNA doubl…	GO:0000166//nucleotide binding	GO:0005737//cytoplasm
gi|532790173|gb|GAHT01028094.1|	Transcription Factor	CL16009.Contig5_All	0.3199	0.0342	0.107	0.999993	gi|533086716|gb|GAHU01022250.1|	0.2939	0.002	0.007	0	gi|115477188|ref|NP_001062190.1|	187.6	8e-47	Os08g0506700 [Oryza sativa Japonica Group] >gi|113624159|dbj|BAF24104.1| Os08g0506700 [Oryza sativa Japonica Group]	PREDICTED: Brachypodium distachyon transcription factor bHLH130-like (LOC100846325), mRNA	Transcription factor bHLH130 OS=Arabidopsis thaliana GN=BHLH130 PE=1 SV=1	gi|357148388|ref|XM_003574696.1|	73.8	2e-10	PREDICTED: Brachypodium distachyon transcription factor bHLH130-like (LOC100846325), mRNA	sp|Q66GR3|BH130_ARATH	132	1e-31	Transcription factor bHLH130 OS=Arabidopsis thaliana GN=BHLH130 PE=1 SV=1	-	-	-
gi|532759011|gb|GAHT01058361.1|	Signal Transdcution	CL9769.Contig1_All	0.0852	0.0036	0.0419	0.999993	gi|533065126|gb|GAHU01043840.1|	0.2595	0.0045	0.0175	0	gi|218187316|gb|EEC69743.1|	759.6	0	hypothetical protein OsI_39273 [Oryza sativa Indica Group]	PREDICTED: Glycine max LRR receptor-like serine/threonine-protein kinase FEI 1-like (LOC100783363), mRNA	LRR receptor-like serine/threonine-protein kinase FEI 1 OS=Arabidopsis thaliana GN=FEI1 PE=1 SV=1	gi|356516753|ref|XM_003527010.1|	101	2e-18	PREDICTED: Glycine max LRR receptor-like serine/threonine-protein kinase FEI 1-like (LOC100783363), mRNA	sp|C0LGF4|FEI1_ARATH	468	6e-132	LRR receptor-like serine/threonine-protein kinase FEI 1 OS=Arabidopsis thaliana GN=FEI1 PE=1 SV=1	GO:0048519//negative regulation of biological process;GO:0006468//protein phosphorylation;GO:0009887//organ morphogenesis;GO:0010051//xylem and phloem pattern formation;GO:0048439//flower morphogenesis;GO:0050794//regulation of cellular process;GO:0009855//determination of bilateral symmetry	GO:0004674//protein serine/threonine kinase activity;GO:0005524//ATP binding	GO:0016021//integral to membrane;GO:0005886//plasma membrane
gi|532792079|gb|GAHT01026188.1|	Unclassified	CL9126.Contig1_All	0.0522	0.0027	0.0526	0.999993	gi|533097692|gb|GAHU01011274.1|	0	0	0.029	0	gi|125559365|gb|EAZ04901.1|	221.1	1e-56	hypothetical protein OsI_27083 [Oryza sativa Indica Group]	--	Uncharacterized GPI-anchored protein At3g06035 OS=Arabidopsis thaliana GN=At3g06035 PE=2 SV=1	--	--	--	--	sp|Q84MC0|UGPI4_ARATH	199	2e-51	Uncharacterized GPI-anchored protein At3g06035 OS=Arabidopsis thaliana GN=At3g06035 PE=2 SV=1	GO:0009750//response to fructose stimulus;GO:0009651//response to salt stress;GO:0010075//regulation of meristem growth;GO:0006833//water transport;GO:0030003//cellular cation homeostasis;GO:0070838//divalent metal ion transport	-	GO:0016023//cytoplasmic membrane-bounded vesicle;GO:0046658//anchored to plasma membrane
gi|532801264|gb|GAHT01018338.1|	Unclassified	CL6174.Contig2_All	0.024	0.0024	0.1016	0.999993	gi|533089255|gb|GAHU01019711.1|	0	0	0.0161	0	gi|255571107|ref|XP_002526504.1|	390.6	2e-107	protein with unknown function [Ricinus communis] >gi|223534179|gb|EEF35895.1| protein with unknown function [Ricinus communis]	PREDICTED: Vitis vinifera ras-related protein RABH1b-like (LOC100242004), mRNA	Ras-related protein RABH1b OS=Arabidopsis thaliana GN=RABH1B PE=1 SV=1	gi|359474579|ref|XM_002281787.2|	339	4e-90	PREDICTED: Vitis vinifera ras-related protein RABH1b-like (LOC100242004), mRNA	sp|O80501|RAH1B_ARATH	379	1e-105	Ras-related protein RABH1b OS=Arabidopsis thaliana GN=RABH1B PE=1 SV=1	GO:0007264//small GTPase mediated signal transduction;GO:0032940//secretion by cell;GO:0006891//intra-Golgi vesicle-mediated transport;GO:0006944//cellular membrane fusion;GO:0015031//protein transport	GO:0005515//protein binding;GO:0016787//hydrolase activity;GO:0005525//GTP binding	GO:0005829//cytosol;GO:0005739//mitochondrion;GO:0000139//Golgi membrane;GO:0009506//plasmodesma;GO:0005768//endosome;GO:0005774//vacuolar membrane;GO:0005802//trans-Golgi network;GO:0005886//plasma membrane
gi|532812160|gb|GAHT01008764.1|	Protein Destination and Storage	CL10352.Contig4_All	0.05	0.0018	0.0362	0.999994	gi|533098544|gb|GAHU01010422.1|	0.5744	0.0902	0.1571	0	gi|225431100|ref|XP_002264558.1|	430.6	1e-119	PREDICTED: 26S proteasome non-ATPase regulatory subunit 4 [Vitis vinifera] >gi|297734994|emb|CBI17356.3| unnamed protein product [Vitis vinifera]	Mesembryanthemum crystallinum 26S proteasome regulatory subunit S5A mRNA, complete cds	26S proteasome non-ATPase regulatory subunit 4 OS=Arabidopsis thaliana GN=MBP1 PE=1 SV=1	gi|3202041|gb|AF069324.1|AF069324	333	2e-88	Mesembryanthemum crystallinum 26S proteasome regulatory subunit S5A mRNA, complete cds	sp|P55034|PSMD4_ARATH	389	1e-108	26S proteasome non-ATPase regulatory subunit 4 OS=Arabidopsis thaliana GN=MBP1 PE=1 SV=1	GO:0051788//response to misfolded protein;GO:0048455//stamen formation;GO:0009744//response to sucrose stimulus;GO:0043161//proteasomal ubiquitin-dependent protein catabolic process;GO:0006974//response to DNA damage stimulus;GO:0009651//response to salt stress;GO:0048767//root hair elongation;GO:0010029//regulation of seed germination;GO:0010150//leaf senescence;GO:0009555//pollen development;GO…	GO:0001653//peptide receptor activity	GO:0016020//membrane;GO:0005829//cytosol;GO:0000502//proteasome complex
gi|532749594|gb|GAHT01067776.1|	Energy	CL1132.Contig1_All	0.2702	0.0114	0.0422	0.999995	gi|532979009|gb|GAHU01095805.1|	0.6469	0.0163	0.0252	0	gi|356553599|ref|XP_003545142.1|	612.5	7e-174	PREDICTED: glycerol-3-phosphate acyltransferase 1-like [Glycine max]	PREDICTED: Brachypodium distachyon probable glycerol-3-phosphate acyltransferase 3-like (LOC100828591), mRNA	Glycerol-3-phosphate acyltransferase 1 OS=Arabidopsis thaliana GN=GPAT1 PE=1 SV=1	gi|357131909|ref|XM_003567528.1|	65.9	1e-07	PREDICTED: Brachypodium distachyon probable glycerol-3-phosphate acyltransferase 3-like (LOC100828591), mRNA	sp|Q9SHJ5|GPAT1_ARATH	500	1e-141	Glycerol-3-phosphate acyltransferase 1 OS=Arabidopsis thaliana GN=GPAT1 PE=1 SV=1	GO:0006655//phosphatidylglycerol biosynthetic process;GO:0048235//pollen sperm cell differentiation;GO:0080167//response to karrikin	GO:0090447//glycerol-3-phosphate 2-O-acyltransferase activity;GO:0003841//1-acylglycerol-3-phosphate O-acyltransferase activity	GO:0016020//membrane;GO:0005739//mitochondrion
gi|532789634|gb|GAHT01028633.1|	Energy	CL6159.Contig2_All	0.1644	0.0096	0.0586	0.999995	gi|533094665|gb|GAHU01014301.1|	0.6359	0.0048	0.0076	0	gi|115435934|ref|NP_001042725.1|	624.8	1e-177	Os01g0276100 [Oryza sativa Japonica Group] >gi|81686717|dbj|BAE48299.1| NAD-dependent isocitrate dehydrogenase a [Oryza sativa Japonica Group] >gi|113532256|dbj|BAF04639.1| Os01g0276100 [Oryza sativa Japonica Group]	Phyllostachys edulis cDNA clone: bphyst018c04, full insert sequence	Isocitrate dehydrogenase [NAD] catalytic subunit 5, mitochondrial OS=Arabidopsis thaliana GN=IDH5 PE=1 SV=1	gi|242387812|emb|FP094670.1|	515	1e-143	Phyllostachys edulis cDNA clone: bphyst018c04, full insert sequence	sp|Q945K7|IDH5_ARATH	595	2e-170	Isocitrate dehydrogenase [NAD] catalytic subunit 5, mitochondrial OS=Arabidopsis thaliana GN=IDH5 PE=1 SV=1	GO:0006099//tricarboxylic acid cycle;GO:0006102//isocitrate metabolic process	GO:0051287//NAD binding;GO:0005524//ATP binding;GO:0000287//magnesium ion binding;GO:0004449//isocitrate dehydrogenase (NAD+) activity;GO:0008270//zinc ion binding	GO:0009507//chloroplast;GO:0005739//mitochondrion
gi|532807469|gb|GAHT01012294.1|	Protein Destination and Storage	CL12108.Contig1_All	0.1803	0.0171	0.0947	0.999995	gi|533100913|gb|GAHU01008053.1|	0.5131	0.038	0.0741	0	gi|115439637|ref|NP_001044098.1|	432.2	1e-119	Os01g0721900 [Oryza sativa Japonica Group] >gi|113533629|dbj|BAF06012.1| Os01g0721900 [Oryza sativa Japonica Group]	PREDICTED: Brachypodium distachyon uncharacterized LOC100837480 (LOC100837480), mRNA	Formin-like protein 5 OS=Oryza sativa subsp. japonica GN=FH5 PE=2 SV=2	gi|357132831|ref|XM_003567984.1|	91.7	2e-15	PREDICTED: Brachypodium distachyon uncharacterized LOC100837480 (LOC100837480), mRNA	sp|Q84ZL0|FH5_ORYSJ	68.2	1e-12	Formin-like protein 5 OS=Oryza sativa subsp. japonica GN=FH5 PE=2 SV=2	-	-	GO:0044424//intracellular part
gi|532801792|gb|GAHT01017810.1|	Secondary metabolism	CL12590.Contig3_All	0.1023	0.0033	0.0325	0.999995	gi|533078370|gb|GAHU01030596.1|	0.2044	0.0034	0.0167	0	gi|357168438|ref|XP_003581647.1|	618.2	1e-175	PREDICTED: ent-kaur-16-ene synthase, chloroplastic-like [Brachypodium distachyon]	Ehrharta erecta voucher IRGC 208290 ent-kaurene synthase (KS1) gene, exons 6 through 12 and partial cds	Ent-kaur-16-ene synthase, chloroplastic OS=Oryza sativa subsp. japonica GN=KS1 PE=1 SV=1	gi|163943834|gb|EU179416.1|	69.9	9e-09	Ehrharta erecta voucher IRGC 208290 ent-kaurene synthase (KS1) gene, exons 6 through 12 and partial cds	sp|Q0JA82|KS1_ORYSJ	606	1e-173	Ent-kaur-16-ene synthase, chloroplastic OS=Oryza sativa subsp. japonica GN=KS1 PE=1 SV=1	-	GO:0046872//metal ion binding;GO:0010333//terpene synthase activity	GO:0005739//mitochondrion
gi|532802251|gb|GAHT01017351.1|	Signal Transdcution	CL926.Contig4_All	0.0793	0.0077	0.0972	0.999995	gi|533074806|gb|GAHU01034160.1|	0.2005	0.0031	0.0153	0	gi|116794480|gb|ABK27157.1|	397.9	2e-109	unknown [Picea sitchensis]	PREDICTED: Brachypodium distachyon casein kinase II subunit beta-like (LOC100827542), mRNA	Casein kinase II subunit beta OS=Arabidopsis thaliana GN=CKB1 PE=1 SV=1	gi|357165058|ref|XM_003580208.1|	83.8	5e-13	PREDICTED: Brachypodium distachyon casein kinase II subunit beta-like (LOC100827542), mRNA	sp|P40228|CSK2B_ARATH	337	1e-92	Casein kinase II subunit beta OS=Arabidopsis thaliana GN=CKB1 PE=1 SV=1	GO:0042753//positive regulation of circadian rhythm;GO:0071900//regulation of protein serine/threonine kinase activity;GO:0048573//photoperiodism, flowering	GO:0004674//protein serine/threonine kinase activity;GO:0005515//protein binding;GO:0019887//protein kinase regulator activity	GO:0005956//protein kinase CK2 complex;GO:0005737//cytoplasm;GO:0005634//nucleus
gi|532794311|gb|GAHT01023956.1|	Protein Synthesis	CL8240.Contig1_All	0.0992	0.0039	0.0392	0.999995	gi|533107660|gb|GAHU01001306.1|	0.0327	0.0078	0.2387	0	gi|357502689|ref|XP_003621633.1|	213.4	1e-54	60S ribosomal protein L30 [Medicago truncatula] >gi|355496648|gb|AES77851.1| 60S ribosomal protein L30 [Medicago truncatula]	Allium cepa clone AGF176 maintainer line sequence	60S ribosomal protein L30 OS=Lupinus luteus GN=RPL30 PE=3 SV=1	gi|15487706|gb|AF366453.1|AF366453	258	5e-66	Allium cepa clone AGF176 maintainer line sequence	sp|O49884|RL30_LUPLU	212	9e-56	60S ribosomal protein L30 OS=Lupinus luteus GN=RPL30 PE=3 SV=1	GO:0006412//translation	GO:0003735//structural constituent of ribosome	GO:0005840//ribosome
gi|532770355|gb|GAHT01047912.1|	Signal Transdcution	CL13959.Contig2_All	0.3046	0.0159	0.0523	0.999995	gi|533055413|gb|GAHU01052939.1|	0	0	0.0127	0	gi|1370160|emb|CAA98186.1|	351.3	1e-95	RAB11J [Lotus japonicus]	L.japonicus mRNA for small GTP-binding protein, RAB11J	Ras-related protein RABA5a OS=Arabidopsis thaliana GN=RABA5A PE=2 SV=1	gi|1370159|emb|Z73958.1|	315	4e-83	L.japonicus mRNA for small GTP-binding protein, RAB11J	sp|Q9FGK5|RAA5A_ARATH	343	8e-95	Ras-related protein RABA5a OS=Arabidopsis thaliana GN=RABA5A PE=2 SV=1	GO:0007264//small GTPase mediated signal transduction;GO:0015031//protein transport	GO:0005525//GTP binding;GO:0016787//hydrolase activity	GO:0005886//plasma membrane;GO:0005774//vacuolar membrane
gi|532807248|gb|GAHT01012445.1|	Transporter	CL10005.Contig1_All	0.0737	0.0015	0.0201	0.999995	gi|533089611|gb|GAHU01019355.1|	0	0	0.009	0	gi|298204473|emb|CBI23748.3|	404.4	1e-111	unnamed protein product [Vitis vinifera]	PREDICTED: Vitis vinifera magnesium transporter MRS2-4-like (LOC100246349), mRNA	Magnesium transporter MRS2-4 OS=Arabidopsis thaliana GN=MRS2-4 PE=1 SV=1	gi|359485994|ref|XM_002265159.2|	176	4e-41	PREDICTED: Vitis vinifera magnesium transporter MRS2-4-like (LOC100246349), mRNA	sp|Q93ZD7|MRS24_ARATH	349	2e-96	Magnesium transporter MRS2-4 OS=Arabidopsis thaliana GN=MRS2-4 PE=1 SV=1	GO:0009555//pollen development;GO:0015693//magnesium ion transport;GO:0055085//transmembrane transport	GO:0015095//magnesium ion transmembrane transporter activity	GO:0016023//cytoplasmic membrane-bounded vesicle;GO:0005886//plasma membrane;GO:0005739//mitochondrion
gi|532820810|gb|GAHT01000114.1|	Transcription	CL4.Contig2_All	0.0461	0.0026	0.0555	0.999995	gi|533107837|gb|GAHU01001129.1|	0	0	0.0111	0	gi|115486523|ref|NP_001068405.1|	316.2	4e-85	Os11g0660500 [Oryza sativa Japonica Group] >gi|549063|sp|P35681.1|TCTP_ORYSJ RecName: Full=Translationally-controlled tumor protein homolog; Short=TCTP >gi|303835|dbj|BAA02151.1| 21kd polypeptide [Oryza sativa Japonica Group] >gi|113645627|dbj|BAF28768.1| Os11g0660500 [Oryza sativa Japonica Group] >gi|169244499|gb|ACA50523.1| translational controlled tumor-like protein [Oryza sativa Japonica Grou…	Oryza sativa clone RRlibD00551 mRNA sequence	Translationally-controlled tumor protein homolog OS=Oryza sativa subsp. japonica GN=TCTP PE=1 SV=1	gi|347662075|gb|BT132428.1|	260	2e-66	Oryza sativa clone RRlibD00551 mRNA sequence	sp|P35681|TCTP_ORYSJ	316	1e-86	Translationally-controlled tumor protein homolog OS=Oryza sativa subsp. japonica GN=TCTP PE=1 SV=1	-	-	-
gi|532812679|gb|GAHT01008245.1|	Unclassified	CL10324.Contig3_All	0.1152	0.006	0.0519	0.999996	gi|533097822|gb|GAHU01011144.1|	0.5909	0.022	0.0373	0	gi|242088203|ref|XP_002439934.1|	292.7	5e-78	hypothetical protein SORBIDRAFT_09g022970 [Sorghum bicolor] >gi|241945219|gb|EES18364.1| hypothetical protein SORBIDRAFT_09g022970 [Sorghum bicolor]	Oryza sativa Japonica Group Os05g0467300 (Os05g0467300) mRNA, complete cds	SelT-like protein OS=Arabidopsis thaliana GN=At3g47300 PE=2 SV=2	gi|115464382|ref|NM_001062326.1|	105	8e-20	Oryza sativa Japonica Group Os05g0467300 (Os05g0467300) mRNA, complete cds	sp|Q9STZ2|SELT_ARATH	259	1e-69	SelT-like protein OS=Arabidopsis thaliana GN=At3g47300 PE=2 SV=2	-	-	GO:0016023//cytoplasmic membrane-bounded vesicle
gi|532770330|gb|GAHT01047937.1|	Unclassified	CL12949.Contig2_All	0.1034	0.0033	0.0322	0.999996	gi|533048762|gb|GAHU01058804.1|	0.4171	0.0373	0.0893	0	gi|222640813|gb|EEE68945.1|	526.2	5e-148	hypothetical protein OsJ_27827 [Oryza sativa Japonica Group]	--	F-box protein At-B OS=Arabidopsis thaliana GN=ATB PE=2 SV=1	--	--	--	--	sp|Q9ZWC6|ATB_ARATH	491	4e-139	F-box protein At-B OS=Arabidopsis thaliana GN=ATB PE=2 SV=1	GO:0000956//nuclear-transcribed mRNA catabolic process	-	-
gi|532805099|gb|GAHT01014503.1|	Unclassified	CL5542.Contig2_All	0.0726	0.0035	0.0484	0.999996	gi|532990271|gb|GAHU01090024.1|	0.3017	0.0035	0.0115	0	gi|326494812|dbj|BAJ94525.1|	353.2	2e-96	predicted protein [Hordeum vulgare subsp. vulgare]	Phyllostachys edulis cDNA clone: bphylf057m10, full insert sequence	--	gi|242385924|emb|FP093775.1|	119	5e-24	Phyllostachys edulis cDNA clone: bphylf057m10, full insert sequence	--	--	--	--	GO:0019365//pyridine nucleotide salvage;GO:0009737//response to abscisic acid stimulus	GO:0008936//nicotinamidase activity	GO:0005737//cytoplasm;GO:0005634//nucleus
gi|532751833|gb|GAHT01065537.1|	Transcription	CL19209.Contig2_All	0.2222	0.0107	0.0481	0.999996	gi|533001429|gb|GAHU01084326.1|	0.156	0.0013	0.0085	0	gi|255559360|ref|XP_002520700.1|	676.4	0	RNA binding protein, putative [Ricinus communis] >gi|223540085|gb|EEF41662.1| RNA binding protein, putative [Ricinus communis]	Oryza sativa Japonica Group Os01g0938200 (Os01g0938200) mRNA, complete cds	Flowering time control protein FCA OS=Arabidopsis thaliana GN=FCA PE=1 SV=2	gi|115442120|ref|NM_001051875.1|	276	8e-71	Oryza sativa Japonica Group Os01g0938200 (Os01g0938200) mRNA, complete cds	sp|O04425|FCA_ARATH	160	2e-39	Flowering time control protein FCA OS=Arabidopsis thaliana GN=FCA PE=1 SV=2	GO:0009626//plant-type hypersensitive response;GO:0080151//positive regulation of salicylic acid mediated signaling pathway	GO:0003723//RNA binding;GO:0000166//nucleotide binding	GO:0005737//cytoplasm
gi|532801767|gb|GAHT01017835.1|	Unclassified	CL9084.Contig3_All	0.1861	0.011	0.0592	0.999996	gi|533071055|gb|GAHU01037911.1|	0	0	0.0194	0	gi|225461902|ref|XP_002266574.1|	157.9	1e-37	PREDICTED: uncharacterized protein LOC100254821 [Vitis vinifera] >gi|296089908|emb|CBI39727.3| unnamed protein product [Vitis vinifera]	Phyllostachys edulis cDNA clone: bphyst036l01, full insert sequence	--	gi|242386104|emb|FP098710.1|	67.9	1e-08	Phyllostachys edulis cDNA clone: bphyst036l01, full insert sequence	--	--	--	--	-	-	-
gi|532788122|gb|GAHT01030145.1|	Unclassified	CL68.Contig1_All	0.185	0.0141	0.076	0.999996	gi|533051475|gb|GAHU01056211.1|	0	0	0.0231	0	gi|115484017|ref|NP_001065670.1|	392.1	1e-107	Os11g0133600 [Oryza sativa Japonica Group] >gi|113644374|dbj|BAF27515.1| Os11g0133600 [Oryza sativa Japonica Group]	Solanum lycopersicum cDNA, clone: LEFL1049DF01, HTC in leaf	--	gi|225317777|dbj|AK323134.1|	133	5e-28	Solanum lycopersicum cDNA, clone: LEFL1049DF01, HTC in leaf	--	--	--	--	-	-	-
gi|532772101|gb|GAHT01046166.1|	Unclassified	CL5795.Contig2_All	0.1482	0.0072	0.0483	0.999996	gi|533068905|gb|GAHU01040061.1|	0	0	0.0101	0	gi|356530880|ref|XP_003534007.1|	74.7	1e-12	PREDICTED: uncharacterized protein LOC100783074 [Glycine max]	--	--	--	--	--	--	--	--	--	--	-	-	-
gi|532800138|gb|GAHT01019464.1|	Unclassified	CL9899.Contig3_All	0.0884	0.0085	0.0963	0.999996	gi|533070891|gb|GAHU01038075.1|	0	0	0.0183	0	gi|77555803|gb|ABA98599.1|	330.1	2e-89	expressed protein [Oryza sativa Japonica Group]	Phyllostachys edulis cDNA clone: bphyem207i01, full insert sequence	--	gi|242381735|emb|FP091382.1|	278	8e-72	Phyllostachys edulis cDNA clone: bphyem207i01, full insert sequence	--	--	--	--	-	-	-
gi|532778541|gb|GAHT01039726.1|	Primary Metabolism	CL10241.Contig3_All	0.0544	0.001	0.0175	0.999996	gi|533078530|gb|GAHU01030436.1|	0	0	0.0058	0	gi|255577893|ref|XP_002529819.1|	663.7	0	acetolactate synthase, putative [Ricinus communis] >gi|223530696|gb|EEF32568.1| acetolactate synthase, putative [Ricinus communis]	Zea mays uncharacterized LOC100381801 (LOC100381801), mRNA >gi|223945818|gb|BT062296.1| Zea mays full-length cDNA clone ZM_BFb0277C09 mRNA, complete cds	Acetolactate synthase small subunit OS=Galdieria sulphuraria GN=ilvH PE=3 SV=1	gi|293333561|ref|NM_001174598.1|	321	1e-84	Zea mays uncharacterized LOC100381801 (LOC100381801), mRNA >gi|223945818|gb|BT062296.1| Zea mays full-length cDNA clone ZM_BFb0277C09 mRNA, complete cds	sp|Q9MS98|ILVH_GALSU	183	2e-46	Acetolactate synthase small subunit OS=Galdieria sulphuraria GN=ilvH PE=3 SV=1	GO:0006094//gluconeogenesis;GO:0010498//proteasomal protein catabolic process;GO:0007010//cytoskeleton organization;GO:0009082//branched-chain amino acid biosynthetic process	GO:0016597//amino acid binding;GO:0003984//acetolactate synthase activity	GO:0009507//chloroplast
gi|532768361|gb|GAHT01049906.1|	Transcription	CL13253.Contig3_All	0.3	0.0057	0.0191	0.999997	gi|532998069|gb|GAHU01086030.1|	0.7932	0.0348	0.0438	0	gi|357131799|ref|XP_003567521.1|	666.8	0	PREDICTED: BTB/POZ domain-containing protein FBL11-like [Brachypodium distachyon]	PREDICTED: Brachypodium distachyon BTB/POZ domain-containing protein FBL11-like (LOC100837173), mRNA	BTB/POZ domain-containing protein FBL11 OS=Arabidopsis thaliana GN=FBL11 PE=2 SV=2	gi|357131798|ref|XM_003567473.1|	69.9	1e-08	PREDICTED: Brachypodium distachyon BTB/POZ domain-containing protein FBL11-like (LOC100837173), mRNA	sp|Q8S8F2|FBL11_ARATH	530	1e-150	BTB/POZ domain-containing protein FBL11 OS=Arabidopsis thaliana GN=FBL11 PE=2 SV=2	-	-	-
gi|532784614|gb|GAHT01033653.1|	Unclassified	CL12815.Contig2_All	0.2633	0.0093	0.0355	0.999997	gi|533073619|gb|GAHU01035347.1|	0.7668	0.0693	0.0904	0	gi|218197794|gb|EEC80221.1|	402.5	9e-111	hypothetical protein OsI_22145 [Oryza sativa Indica Group]	Populus trichocarpa clone POP011-N24, complete sequence	--	gi|158508738|gb|AC213012.1|	264	2e-67	Populus trichocarpa clone POP011-N24, complete sequence	--	--	--	--	-	-	GO:0005739//mitochondrion;GO:0005794//Golgi apparatus
gi|532757603|gb|GAHT01059769.1|	Unclassified	CL13257.Contig3_All	0.1737	0.0038	0.0218	0.999997	gi|533089622|gb|GAHU01019344.1|	0.7068	0.0522	0.0738	0	gi|242058187|ref|XP_002458239.1|	500.4	3e-140	hypothetical protein SORBIDRAFT_03g029700 [Sorghum bicolor] >gi|241930214|gb|EES03359.1| hypothetical protein SORBIDRAFT_03g029700 [Sorghum bicolor]	PREDICTED: Glycine max uncharacterized protein LOC100778601 (LOC100778601), mRNA	--	gi|356498407|ref|XM_003517996.1|	77.8	3e-11	PREDICTED: Glycine max uncharacterized protein LOC100778601 (LOC100778601), mRNA	--	--	--	--	-	-	GO:0005773//vacuole
gi|532805393|gb|GAHT01014209.1|	Primary Metabolism	CL13519.Contig2_All	0.1955	0.0059	0.0301	0.999997	gi|533095702|gb|GAHU01013264.1|	0.583	0.041	0.0704	0	gi|225446509|ref|XP_002278663.1|	1027.3	0	PREDICTED: acyl-coenzyme A oxidase 3, peroxisomal [Vitis vinifera]	PREDICTED: Vitis vinifera acyl-coenzyme A oxidase 3, peroxisomal-like (LOC100257524), mRNA	Acyl-coenzyme A oxidase 3, peroxisomal OS=Arabidopsis thaliana GN=ACX3 PE=1 SV=1	gi|225446508|ref|XM_002278627.1|	359	9e-96	PREDICTED: Vitis vinifera acyl-coenzyme A oxidase 3, peroxisomal-like (LOC100257524), mRNA	sp|P0CZ23|ACOX3_ARATH	977	0	Acyl-coenzyme A oxidase 3, peroxisomal OS=Arabidopsis thaliana GN=ACX3 PE=1 SV=1	GO:0051791//medium-chain fatty acid metabolic process;GO:0006635//fatty acid beta-oxidation	GO:0050660//flavin adenine dinucleotide binding;GO:0003995//acyl-CoA dehydrogenase activity;GO:0003997//acyl-CoA oxidase activity	GO:0005777//peroxisome
gi|532755227|gb|GAHT01062143.1|	Unclassified	CL8568.Contig1_All	0.3037	0.0078	0.0258	0.999997	gi|533033830|gb|GAHU01068780.1|	0.5093	0.0094	0.0185	0	gi|359477306|ref|XP_002276974.2|	629.8	9e-179	PREDICTED: uncharacterized protein LOC100266667 [Vitis vinifera]	PREDICTED: Vitis vinifera uncharacterized LOC100266667 (LOC100266667), mRNA	--	gi|359477305|ref|XM_002276938.2|	105	3e-19	PREDICTED: Vitis vinifera uncharacterized LOC100266667 (LOC100266667), mRNA	--	--	--	--	-	-	-
gi|532801842|gb|GAHT01017760.1|	Transporter	CL6098.Contig1_All	0.128	0.0027	0.0208	0.999997	gi|533079906|gb|GAHU01029060.1|	0.3236	0.0027	0.0082	0	gi|255541526|ref|XP_002511827.1|	1543.1	0	Glutathione-regulated potassium-efflux system protein kefB, putative [Ricinus communis] >gi|223549007|gb|EEF50496.1| Glutathione-regulated potassium-efflux system protein kefB, putative [Ricinus communis]	PREDICTED: Vitis vinifera K(+) efflux antiporter 2, chloroplastic-like (LOC100244810), mRNA	K(+) efflux antiporter 2, chloroplastic OS=Arabidopsis thaliana GN=KEA2 PE=1 SV=2	gi|359489728|ref|XM_002269316.2|	1094	0	PREDICTED: Vitis vinifera K(+) efflux antiporter 2, chloroplastic-like (LOC100244810), mRNA	sp|O65272|KEA2_ARATH	1438	0	K(+) efflux antiporter 2, chloroplastic OS=Arabidopsis thaliana GN=KEA2 PE=1 SV=2	GO:0055085//transmembrane transport;GO:0015992//proton transport;GO:0006813//potassium ion transport	GO:0015386//potassium:hydrogen antiporter activity;GO:0000166//nucleotide binding	GO:0009941//chloroplast envelope;GO:0016021//integral to membrane
gi|532808030|gb|GAHT01012023.1|	Cell growth/division	CL6609.Contig1_All	0.1074	0.0031	0.029	0.999997	gi|533095478|gb|GAHU01013488.1|	0	0	0.0148	0	gi|359494652|ref|XP_002267780.2|	632.9	4e-180	PREDICTED: metacaspase-5-like isoform 2 [Vitis vinifera]	PREDICTED: Brachypodium distachyon metacaspase-4-like (LOC100836742), mRNA	Metacaspase-4 OS=Arabidopsis thaliana GN=AMC4 PE=1 SV=1	gi|357125443|ref|XM_003564356.1|	186	5e-44	PREDICTED: Brachypodium distachyon metacaspase-4-like (LOC100836742), mRNA	sp|O64517|MCA4_ARATH	546	1e-155	Metacaspase-4 OS=Arabidopsis thaliana GN=AMC4 PE=1 SV=1	GO:0009611//response to wounding;GO:0009805//coumarin biosynthetic process;GO:0042542//response to hydrogen peroxide;GO:0006816//calcium ion transport;GO:0009651//response to salt stress;GO:0007033//vacuole organization;GO:0015706//nitrate transport;GO:0048767//root hair elongation;GO:0007030//Golgi organization;GO:0016540//protein autoprocessing;GO:0010225//response to UV-C;GO:0006917//induction…	GO:0004197//cysteine-type endopeptidase activity;GO:0042802//identical protein binding	GO:0009507//chloroplast;GO:0005576//extracellular region;GO:0005829//cytosol;GO:0009506//plasmodesma;GO:0005886//plasma membrane
gi|532792590|gb|GAHT01025677.1|	Protein Destination and Storage	CL17081.Contig2_All	0.0763	0.0029	0.0375	0.999997	gi|533064532|gb|GAHU01044434.1|	0	0	0.0092	0	gi|116787013|gb|ABK24341.1|	306.2	3e-82	unknown [Picea sitchensis] >gi|116791120|gb|ABK25864.1| unknown [Picea sitchensis] >gi|224287055|gb|ACN41228.1| unknown [Picea sitchensis]	Populus EST from leave	Ubiquitin-conjugating enzyme E2 36 OS=Arabidopsis thaliana GN=UBC36 PE=1 SV=1	gi|160955035|emb|CU225250.1|	389	1e-105	Populus EST from leave	sp|Q9FZ48|UBC36_ARATH	305	2e-83	Ubiquitin-conjugating enzyme E2 36 OS=Arabidopsis thaliana GN=UBC36 PE=1 SV=1	GO:0006301//postreplication repair;GO:0006511//ubiquitin-dependent protein catabolic process;GO:0010053//root epidermal cell differentiation;GO:0010039//response to iron ion;GO:0016579//protein deubiquitination;GO:0046686//response to cadmium ion	GO:0004842//ubiquitin-protein ligase activity;GO:0005524//ATP binding;GO:0005515//protein binding	GO:0005829//cytosol;GO:0031372//UBC13-MMS2 complex;GO:0009507//chloroplast;GO:0005634//nucleus;GO:0005886//plasma membrane
gi|532801227|gb|GAHT01018375.1|	Protein destination and Storage	CL8838.Contig3_All	0.0571	0.0013	0.0222	0.999997	gi|533081524|gb|GAHU01027442.1|	0	0	0.0114	0	gi|212723904|ref|NP_001131263.1|	508.1	1e-142	uncharacterized protein LOC100192576 [Zea mays]	Oryza sativa Japonica Group Os05g0543700 (Os05g0543700) mRNA, complete cds	Chaperone protein dnaJ 10 OS=Arabidopsis thaliana GN=ATJ10 PE=2 SV=2	gi|115465212|ref|NM_001062741.1|	113	5e-22	Oryza sativa Japonica Group Os05g0543700 (Os05g0543700) mRNA, complete cds	sp|Q8GYX8|DNJ10_ARATH	350	9e-97	Chaperone protein dnaJ 10 OS=Arabidopsis thaliana GN=ATJ10 PE=2 SV=2	GO:0006457//protein folding	GO:0051082//unfolded protein binding;GO:0031072//heat shock protein binding	GO:0005829//cytosol
gi|532764075|gb|GAHT01054192.1|	Primary Metabolism	CL9409.Contig3_All	0.1773	0.0048	0.027	0.999998	gi|533057118|gb|GAHU01051602.1|	0.7025	0.0459	0.0654	0	gi|359495718|ref|XP_003635071.1|	445.7	5e-124	PREDICTED: putative PAP-specific phosphatase, mitochondrial-like [Vitis vinifera] >gi|297745650|emb|CBI40861.3| unnamed protein product [Vitis vinifera]	Arabidopsis lyrata subsp. lyrata inositol monophosphatase family protein, mRNA	SAL1 phosphatase OS=Arabidopsis thaliana GN=SAL1 PE=1 SV=1	gi|297809702|ref|XM_002872689.1|	65.9	8e-08	Arabidopsis lyrata subsp. lyrata inositol monophosphatase family protein, mRNA	sp|Q42546|DPNP1_ARATH	139	3e-33	SAL1 phosphatase OS=Arabidopsis thaliana GN=SAL1 PE=1 SV=1	GO:0006790//sulfur compound metabolic process	GO:0008441//3'(2'),5'-bisphosphate nucleotidase activity	GO:0009507//chloroplast;GO:0005739//mitochondrion
gi|532800654|gb|GAHT01018948.1|	protein destination and Storage	CL15934.Contig1_All	0.1584	0.0037	0.0233	0.999998	gi|533106118|gb|GAHU01002848.1|	0.6884	0.1166	0.1693	0	gi|297741106|emb|CBI31837.3|	295	1e-78	unnamed protein product [Vitis vinifera]	Phyllostachys edulis cDNA clone: bphylf042f07, full insert sequence	BAG family molecular chaperone regulator 1 OS=Arabidopsis thaliana GN=BAG1 PE=1 SV=1	gi|242387923|emb|FP099750.1|	93.7	4e-16	Phyllostachys edulis cDNA clone: bphylf042f07, full insert sequence	sp|Q0WUQ1|BAG1_ARATH	240	1e-63	BAG family molecular chaperone regulator 1 OS=Arabidopsis thaliana GN=BAG1 PE=1 SV=1	GO:0006915//apoptotic process	-	GO:0016023//cytoplasmic membrane-bounded vesicle
gi|532765039|gb|GAHT01053228.1|	Unclassified	CL3270.Contig3_All	0.162	0.0033	0.0204	0.999998	gi|533082753|gb|GAHU01026213.1|	0.3703	0.0202	0.0544	0	gi|225441056|ref|XP_002283988.1|	603.2	2e-171	PREDICTED: uncharacterized protein LOC100240792 isoform 1 [Vitis vinifera] >gi|297740033|emb|CBI30215.3| unnamed protein product [Vitis vinifera]	Phyllostachys edulis cDNA clone: bphyem209d20, full insert sequence	--	gi|242385315|emb|FP093366.1|	192	6e-46	Phyllostachys edulis cDNA clone: bphyem209d20, full insert sequence	--	--	--	--	-	-	GO:0005739//mitochondrion;GO:0016021//integral to membrane
gi|532767889|gb|GAHT01050378.1|	Cell growth/division	CL17096.Contig2_All	0.0598	0.0008	0.0138	0.999998	gi|533076690|gb|GAHU01032276.1|	0.1491	0.0016	0.011	0	gi|147844302|emb|CAN82117.1|	743	0	hypothetical protein VITISV_031342 [Vitis vinifera]	PREDICTED: Vitis vinifera probable protein phosphatase 2C 39-like (LOC100264381), mRNA	Probable protein phosphatase 2C 39 OS=Oryza sativa subsp. japonica GN=Os04g0403701 PE=2 SV=2	gi|359473845|ref|XM_002268776.2|	149	1e-32	PREDICTED: Vitis vinifera probable protein phosphatase 2C 39-like (LOC100264381), mRNA	sp|Q7XVF9|P2C39_ORYSJ	609	2e-174	Probable protein phosphatase 2C 39 OS=Oryza sativa subsp. japonica GN=Os04g0403701 PE=2 SV=2	GO:0008152//metabolic process	GO:0003824//catalytic activity	-
gi|532811358|gb|GAHT01009566.1|	Protein Synthesis	CL4451.Contig2_All	0.0423	0.0017	0.0402	0.999998	gi|533096116|gb|GAHU01012850.1|	0.1193	0.0034	0.0283	0	gi|50404475|gb|AAT76902.1|	415.2	1e-114	asparagine synthase-related protein [Elaeis guineensis]	Oryza rufipogon (W1943) cDNA clone: ORW1943C107G09, full insert sequence	Stem-specific protein TSJT1 OS=Nicotiana tabacum GN=TSJT1 PE=2 SV=1	gi|157887939|emb|CT841672.1|	184	1e-43	Oryza rufipogon (W1943) cDNA clone: ORW1943C107G09, full insert sequence	sp|P24805|TSJT1_TOBAC	116	3e-26	Stem-specific protein TSJT1 OS=Nicotiana tabacum GN=TSJT1 PE=2 SV=1	GO:0009862//systemic acquired resistance, salicylic acid mediated signaling pathway;GO:0010310//regulation of hydrogen peroxide metabolic process;GO:0001666//response to hypoxia	GO:0005515//protein binding	GO:0009506//plasmodesma;GO:0005886//plasma membrane;GO:0005634//nucleus;GO:0005829//cytosol
gi|532779472|gb|GAHT01038795.1|	Primary Metabolism	CL7310.Contig3_All	0.0582	0.0012	0.0198	0.999998	gi|533076703|gb|GAHU01032263.1|	0.1086	0.0035	0.0318	0	gi|297745189|emb|CBI39181.3|	735.3	0	unnamed protein product [Vitis vinifera]	PREDICTED: Brachypodium distachyon probable methyltransferase PMT19-like (LOC100832033), mRNA	Probable methyltransferase PMT19 OS=Arabidopsis thaliana GN=At2g43200 PE=2 SV=1	gi|357131471|ref|XM_003567313.1|	159	1e-35	PREDICTED: Brachypodium distachyon probable methyltransferase PMT19-like (LOC100832033), mRNA	sp|Q9ZW75|PMTJ_ARATH	631	0	Probable methyltransferase PMT19 OS=Arabidopsis thaliana GN=At2g43200 PE=2 SV=1	GO:0032259//methylation	GO:0008168//methyltransferase activity	-
gi|532793847|gb|GAHT01024420.1|	Energy	Unigene54302_All	0.2388	0.0176	0.0737	0.999998	gi|533102302|gb|GAHU01006664.1|	0	0	0.0207	0	gi|225456459|ref|XP_002284444.1|	301.2	6e-81	PREDICTED: V-type proton ATPase subunit C [Vitis vinifera] >gi|297734491|emb|CBI15738.3| unnamed protein product [Vitis vinifera]	PREDICTED: Vitis vinifera V-type proton ATPase subunit C-like (LOC100266332), mRNA	V-type proton ATPase subunit C OS=Arabidopsis thaliana GN=VHA-C PE=1 SV=1	gi|359491131|ref|XM_002284408.2|	184	7e-44	PREDICTED: Vitis vinifera V-type proton ATPase subunit C-like (LOC100266332), mRNA	sp|Q9SDS7|VATC_ARATH	281	3e-76	V-type proton ATPase subunit C OS=Arabidopsis thaliana GN=VHA-C PE=1 SV=1	GO:0043255//regulation of carbohydrate biosynthetic process;GO:0051788//response to misfolded protein;GO:0009853//photorespiration;GO:0030243//cellulose metabolic process;GO:0006007//glucose catabolic process;GO:0006816//calcium ion transport;GO:0009651//response to salt stress;GO:0015991//ATP hydrolysis coupled proton transport;GO:0007033//vacuole organization;GO:0009809//lignin biosynthetic pro…	GO:0046961//proton-transporting ATPase activity, rotational mechanism	GO:0000325//plant-type vacuole;GO:0009507//chloroplast;GO:0005794//Golgi apparatus;GO:0005829//cytosol;GO:0000221//vacuolar proton-transporting V-type ATPase, V1 domain;GO:0005886//plasma membrane
gi|532785012|gb|GAHT01033255.1|	Primary Metabolism	Unigene21244_All	0.2139	0.0033	0.0155	0.999998	gi|533077045|gb|GAHU01031921.1|	0	0	0.0066	0	gi|225454224|ref|XP_002273843.1|	1011.1	0	PREDICTED: beta-amylase 7-like [Vitis vinifera]	PREDICTED: Vitis vinifera beta-amylase 7-like (LOC100246489), mRNA	Beta-amylase 7 OS=Arabidopsis thaliana GN=BAM7 PE=2 SV=2	gi|225454223|ref|XM_002273807.1|	609	1e-171	PREDICTED: Vitis vinifera beta-amylase 7-like (LOC100246489), mRNA	sp|O80831|BAM7_ARATH	909	0	Beta-amylase 7 OS=Arabidopsis thaliana GN=BAM7 PE=2 SV=2	GO:0000272//polysaccharide catabolic process;GO:0010048//vernalization response;GO:0048831//regulation of shoot development	GO:0043169//cation binding;GO:0003700//sequence-specific DNA binding transcription factor activity;GO:0016161//beta-amylase activity	GO:0009507//chloroplast;GO:0005634//nucleus
gi|532756720|gb|GAHT01060650.1|	Primary Metabolism	Unigene21566_All	0.1665	0.0081	0.0484	0.999998	gi|532974938|gb|GAHU01097951.1|	0	0	0.0132	0	gi|357145015|ref|XP_003573493.1|	340.5	2e-92	PREDICTED: methyltransferase-like protein 23-like [Brachypodium distachyon]	PREDICTED: Vitis vinifera methyltransferase-like protein 23 (LOC100262571), mRNA	--	gi|359496960|ref|XM_002277684.2|	87.7	2e-14	PREDICTED: Vitis vinifera methyltransferase-like protein 23 (LOC100262571), mRNA	--	--	--	--	-	GO:0003824//catalytic activity	-
gi|532779461|gb|GAHT01038806.1|	Transcription Factor	CL4507.Contig3_All	0.1219	0.0077	0.0635	0.999998	gi|533082806|gb|GAHU01026160.1|	0	0	0.0096	0	gi|312165807|gb|ADQ38902.1|	327	2e-88	bHLH transcription factor [Musa acuminata AAA Group]	Musa acuminata AAA Group bHLH transcription factor mRNA, complete cds	Transcription factor BIM2 OS=Arabidopsis thaliana GN=BIM2 PE=1 SV=1	gi|312165806|gb|HM629800.1|	190	2e-45	Musa acuminata AAA Group bHLH transcription factor mRNA, complete cds	sp|Q9CAA4|BIM2_ARATH	184	7e-47	Transcription factor BIM2 OS=Arabidopsis thaliana GN=BIM2 PE=1 SV=1	-	-	-
gi|532788093|gb|GAHT01030174.1|	Secondary metabolism	CL8189.Contig4_All	0.0477	0.0017	0.0353	0.999998	gi|533072478|gb|GAHU01036488.1|	0	0	0.0323	0	gi|115454765|ref|NP_001050983.1|	477.2	2e-133	Os03g0698900 [Oryza sativa Japonica Group] >gi|108710578|gb|ABF98373.1| Alkaline phytoceramidase family protein, expressed [Oryza sativa Japonica Group] >gi|113549454|dbj|BAF12897.1| Os03g0698900 [Oryza sativa Japonica Group]	Phyllostachys edulis cDNA clone: bphyem209k06, full insert sequence	--	gi|242384928|emb|FP098328.1|	246	5e-62	Phyllostachys edulis cDNA clone: bphyem209k06, full insert sequence	--	--	--	--	GO:0006672//ceramide metabolic process	GO:0016811//hydrolase activity, acting on carbon-nitrogen (but not peptide) bonds, in linear amides	GO:0016021//integral to membrane;GO:0005783//endoplasmic reticulum;GO:0005794//Golgi apparatus
gi|532798531|gb|GAHT01021071.1|	Unclassified	CL12258.Contig1_All	0.2205	0.0043	0.0195	0.999999	gi|533064171|gb|GAHU01044795.1|	1.0457	0.1485	0.142	0	gi|255567017|ref|XP_002524491.1|	289.7	3e-77	conserved hypothetical protein [Ricinus communis] >gi|223536279|gb|EEF37931.1| conserved hypothetical protein [Ricinus communis]	PREDICTED: Vitis vinifera uncharacterized LOC100254186 (LOC100254186), mRNA	--	gi|359484666|ref|XM_002285145.2|	208	6e-51	PREDICTED: Vitis vinifera uncharacterized LOC100254186 (LOC100254186), mRNA	--	--	--	--	-	-	-
gi|532790301|gb|GAHT01027966.1|	Cell growth/division	Unigene2477_All	0.3056	0.0055	0.018	0.999999	gi|533082321|gb|GAHU01026645.1|	0.789	0.0077	0.0098	0	gi|296089619|emb|CBI39438.3|	524.6	9e-148	unnamed protein product [Vitis vinifera]	Vitis vinifera clone SS0ACG23YJ06	U4/U6 small nuclear ribonucleoprotein PRP4-like protein OS=Arabidopsis thaliana GN=EMB2776 PE=2 SV=1	gi|349715571|emb|FQ380867.1|	174	1e-40	Vitis vinifera clone SS0ACG23YJ06	sp|O22212|PRP4L_ARATH	57.4	1e-08	U4/U6 small nuclear ribonucleoprotein PRP4-like protein OS=Arabidopsis thaliana GN=EMB2776 PE=2 SV=1	-	-	GO:0080008//Cul4-RING ubiquitin ligase complex;GO:0005737//cytoplasm;GO:0005834//heterotrimeric G-protein complex
gi|532778299|gb|GAHT01039968.1|	Protein Destination and Storage	CL15863.Contig3_All	0.1644	0.0039	0.0237	0.999999	gi|533070986|gb|GAHU01037980.1|	0.5842	0.0018	0.0031	0	gi|225430662|ref|XP_002268533.1|	592	8e-168	PREDICTED: uncharacterized protein LOC100267311 [Vitis vinifera]	PREDICTED: Vitis vinifera uncharacterized LOC100267311 (LOC100267311), mRNA	Aldolases N-methyltransferase, chloroplastic OS=Arabidopsis thaliana GN=LSMT-L PE=1 SV=1	gi|225430661|ref|XM_002268497.1|	77.8	3e-11	PREDICTED: Vitis vinifera uncharacterized LOC100267311 (LOC100267311), mRNA	sp|Q9XI84|RBCMT_ARATH	82.4	7e-16	Aldolases N-methyltransferase, chloroplastic OS=Arabidopsis thaliana GN=LSMT-L PE=1 SV=1	GO:0009560//embryo sac egg cell differentiation	-	GO:0005634//nucleus
gi|532769045|gb|GAHT01049222.1|	Disease/defense	Unigene7040_All	0.0995	0.0009	0.0093	0.999999	gi|533048462|gb|GAHU01059104.1|	0.5546	0.0121	0.0219	0	gi|255541826|ref|XP_002511977.1|	1454.1	0	DNA mismatch repair protein MSH2, putative [Ricinus communis] >gi|223549157|gb|EEF50646.1| DNA mismatch repair protein MSH2, putative [Ricinus communis]	Triticum aestivum cDNA, clone: WT005_L16, cultivar: Chinese Spring	DNA mismatch repair protein MSH2 OS=Zea mays GN=MUS1 PE=3 SV=1	gi|241985871|dbj|AK333132.1|	246	1e-61	Triticum aestivum cDNA, clone: WT005_L16, cultivar: Chinese Spring	sp|Q9XGC9|MSH2_MAIZE	1382	0	DNA mismatch repair protein MSH2 OS=Zea mays GN=MUS1 PE=3 SV=1	GO:0006346//methylation-dependent chromatin silencing;GO:0006301//postreplication repair;GO:0006306//DNA methylation;GO:0043570//maintenance of DNA repeat elements;GO:0000710//meiotic mismatch repair;GO:0016246//RNA interference;GO:0006311//meiotic gene conversion;GO:0006200//ATP catabolic process;GO:0031507//heterochromatin assembly;GO:0006290//pyrimidine dimer repair;GO:0042981//regulation of a…	GO:0000404//loop DNA binding;GO:0032138//single base insertion or deletion binding;GO:0032137//guanine/thymine mispair binding;GO:0000403//Y-form DNA binding;GO:0000406//double-strand/single-strand DNA junction binding;GO:0005515//protein binding;GO:0005524//ATP binding;GO:0000400//four-way junction DNA binding;GO:0008094//DNA-dependent ATPase activity;GO:0003684//damaged DNA binding	GO:0032301//MutSalpha complex;GO:0032302//MutSbeta complex;GO:0005886//plasma membrane;GO:0000228//nuclear chromosome
gi|532790137|gb|GAHT01028130.1|	Secondary metabolism	Unigene28705_All	0.2438	0.0034	0.014	0.999999	gi|533075002|gb|GAHU01033964.1|	0.5506	0.0151	0.0274	0	gi|90655299|gb|ABD96176.1|	713.4	0	alkaline phytase isoform 2 [Lilium longiflorum]	Lilium longiflorum alkaline phytase isoform 1 mRNA, complete cds	--	gi|90655300|gb|DQ437678.1|	210	4e-51	Lilium longiflorum alkaline phytase isoform 1 mRNA, complete cds	--	--	--	--	-	GO:0004446//inositol-hexakisphosphate phosphatase activity	GO:0016023//cytoplasmic membrane-bounded vesicle
gi|532803358|gb|GAHT01016244.1|	Unclassified	CL8470.Contig3_All	0.156	0.0024	0.0153	0.999999	gi|533072006|gb|GAHU01036960.1|	0.4951	0.05	0.101	0	gi|122937709|gb|ABM68566.1|	641	0	hemolysin III-related family protein [Lilium longiflorum]	Lilium longiflorum clone LLP-82 hemolysin III-related family protein mRNA, partial cds	--	gi|122937708|gb|EF026033.1|	202	7e-49	Lilium longiflorum clone LLP-82 hemolysin III-related family protein mRNA, partial cds	--	--	--	--	GO:0009725//response to hormone stimulus;GO:0009744//response to sucrose stimulus	GO:0004872//receptor activity	GO:0016021//integral to membrane;GO:0005739//mitochondrion
gi|532740603|gb|GAHT01076767.1|	Transcription Factor	CL8408.Contig4_All	0.4069	0.0084	0.0206	0.999999	gi|533051646|gb|GAHU01056046.1|	0.4218	0.0057	0.0135	0	gi|147820976|emb|CAN74602.1|	547	6e-154	hypothetical protein VITISV_028112 [Vitis vinifera]	PREDICTED: Brachypodium distachyon uncharacterized LOC100841229 (LOC100841229), mRNA	Transcription factor LHW OS=Arabidopsis thaliana GN=LHW PE=1 SV=1	gi|357136985|ref|XM_003570035.1|	129	2e-26	PREDICTED: Brachypodium distachyon uncharacterized LOC100841229 (LOC100841229), mRNA	sp|Q9XIN0|LHW_ARATH	260	3e-69	Transcription factor LHW OS=Arabidopsis thaliana GN=LHW PE=1 SV=1	-	-	-
gi|532776576|gb|GAHT01041691.1|	Cell growth/division	Unigene21690_All	0.2806	0.007	0.0251	0.999999	gi|533076890|gb|GAHU01032076.1|	0.3775	0.0087	0.0229	0	gi|357122383|ref|XP_003562895.1|	1012.3	0	PREDICTED: elongator complex protein 1-like [Brachypodium distachyon]	PREDICTED: Vitis vinifera elongator complex protein 1-like (LOC100247912), mRNA	Elongator complex protein 1 OS=Arabidopsis thaliana GN=ELP1 PE=1 SV=1	gi|225449590|ref|XM_002279226.1|	77.8	5e-11	PREDICTED: Vitis vinifera elongator complex protein 1-like (LOC100247912), mRNA	sp|Q9FNA4|ELP1_ARATH	864	0	Elongator complex protein 1 OS=Arabidopsis thaliana GN=ELP1 PE=1 SV=1	GO:0009787//regulation of abscisic acid mediated signaling pathway;GO:0006312//mitotic recombination;GO:0006400//tRNA modification;GO:0035265//organ growth;GO:0009560//embryo sac egg cell differentiation;GO:0080178//5-carbamoylmethyluridine metabolic process;GO:0031538//negative regulation of anthocyanin metabolic process;GO:0009965//leaf morphogenesis;GO:0008284//positive regulation of cell prol…	-	GO:0005829//cytosol;GO:0033588//Elongator holoenzyme complex
gi|532797540|gb|GAHT01022062.1|	Protein Synthesis	Unigene2524_All	0.1562	0.0027	0.017	0.999999	gi|533073807|gb|GAHU01035159.1|	0.3625	0.0057	0.0157	0	gi|242086064|ref|XP_002443457.1|	404.1	1e-111	hypothetical protein SORBIDRAFT_08g019770 [Sorghum bicolor] >gi|241944150|gb|EES17295.1| hypothetical protein SORBIDRAFT_08g019770 [Sorghum bicolor]	PREDICTED: Vitis vinifera cytoplasmic tRNA 2-thiolation protein 2-like (LOC100252179), mRNA	Cytoplasmic tRNA 2-thiolation protein 2 OS=Oryza sativa subsp. japonica GN=CTU2 PE=2 SV=1	gi|225441839|ref|XM_002278253.1|	111	1e-21	PREDICTED: Vitis vinifera cytoplasmic tRNA 2-thiolation protein 2-like (LOC100252179), mRNA	sp|Q2QMW0|CTU2_ORYSJ	391	4e-109	Cytoplasmic tRNA 2-thiolation protein 2 OS=Oryza sativa subsp. japonica GN=CTU2 PE=2 SV=1	-	-	GO:0005737//cytoplasm
gi|532774372|gb|GAHT01043895.1|	Primary Metabolism	CL9200.Contig2_All	0.2917	0.0056	0.019	0.999999	gi|533081005|gb|GAHU01027961.1|	0.3232	0.0065	0.0202	0	gi|296084812|emb|CBI27694.3|	708	0	unnamed protein product [Vitis vinifera]	PREDICTED: Vitis vinifera tetratricopeptide repeat protein 27 homolog (LOC100252760), mRNA	Probable UDP-N-acetylglucosamine--peptide N-acetylglucosaminyltransferase SEC OS=Arabidopsis thaliana GN=SEC PE=2 SV=1	gi|359480920|ref|XM_002268072.2|	291	1e-75	PREDICTED: Vitis vinifera tetratricopeptide repeat protein 27 homolog (LOC100252760), mRNA	sp|Q9M8Y0|SEC_ARATH	50.4	4e-06	Probable UDP-N-acetylglucosamine--peptide N-acetylglucosaminyltransferase SEC OS=Arabidopsis thaliana GN=SEC PE=2 SV=1	GO:0000085//G2 phase of mitotic cell cycle;GO:0006406//mRNA export from nucleus;GO:0016579//protein deubiquitination;GO:0016571//histone methylation;GO:0010388//cullin deneddylation;GO:0009640//photomorphogenesis;GO:0009560//embryo sac egg cell differentiation;GO:0016567//protein ubiquitination;GO:0010074//maintenance of meristem identity;GO:0045893//positive regulation of transcription, DNA-depe…	-	GO:0048046//apoplast;GO:0005634//nucleus
gi|532794472|gb|GAHT01023795.1|	Protein Destination and Storage	CL14447.Contig3_All	0.2714	0.011	0.0404	0.999999	gi|533078649|gb|GAHU01030317.1|	0.3221	0.001	0.0032	0	gi|115465167|ref|NP_001056183.1|	625.9	5e-178	Os05g0540800 [Oryza sativa Japonica Group] >gi|113579734|dbj|BAF18097.1| Os05g0540800 [Oryza sativa Japonica Group]	PREDICTED: Vitis vinifera SWR1-complex protein 4-like (LOC100265771), mRNA	--	gi|359480189|ref|XM_002278845.2|	190	3e-45	PREDICTED: Vitis vinifera SWR1-complex protein 4-like (LOC100265771), mRNA	--	--	--	--	GO:0032259//methylation;GO:0045892//negative regulation of transcription, DNA-dependent	GO:0003677//DNA binding;GO:0003700//sequence-specific DNA binding transcription factor activity;GO:0008168//methyltransferase activity	GO:0005634//nucleus
gi|532781263|gb|GAHT01037004.1|	Unclassified	CL12016.Contig2_All	0.2353	0.0014	0.0062	0.999999	gi|533083297|gb|GAHU01025669.1|	0.3201	0.0012	0.0037	0	gi|225452112|ref|XP_002281005.1|	1234.5	0	PREDICTED: lisH domain and HEAT repeat-containing protein KIAA1468 homolog [Vitis vinifera]	PREDICTED: Vitis vinifera lisH domain and HEAT repeat-containing protein KIAA1468 homolog (LOC100249784), mRNA	--	gi|225452111|ref|XM_002280969.1|	337	4e-89	PREDICTED: Vitis vinifera lisH domain and HEAT repeat-containing protein KIAA1468 homolog (LOC100249784), mRNA	--	--	--	--	-	-	GO:0005737//cytoplasm
gi|532779035|gb|GAHT01039232.1|	Protein Destination and Storage	CL11076.Contig1_All	0.1377	0.0033	0.0236	0.999999	gi|533068157|gb|GAHU01040809.1|	0.3065	0.001	0.0031	0	gi|225460123|ref|XP_002275735.1|	701	0	PREDICTED: tubulin-specific chaperone E [Vitis vinifera] >gi|297741006|emb|CBI31318.3| unnamed protein product [Vitis vinifera]	PREDICTED: Vitis vinifera tubulin-specific chaperone E-like (LOC100256769), mRNA	--	gi|225460122|ref|XM_002275699.1|	89.7	1e-14	PREDICTED: Vitis vinifera tubulin-specific chaperone E-like (LOC100256769), mRNA	--	--	--	--	GO:0000910//cytokinesis;GO:0007021//tubulin complex assembly;GO:0009793//embryo development ending in seed dormancy	GO:0016772//transferase activity, transferring phosphorus-containing groups;GO:0052689	GO:0009507//chloroplast
gi|532772568|gb|GAHT01045699.1|	Unclassified	CL4751.Contig2_All	0.3712	0.0181	0.0488	0.999999	gi|533074563|gb|GAHU01034403.1|	0.3005	0.0045	0.0151	0	gi|255549686|ref|XP_002515894.1|	525.8	1e-147	conserved hypothetical protein [Ricinus communis] >gi|223544799|gb|EEF46314.1| conserved hypothetical protein [Ricinus communis]	PREDICTED: Glycine max uncharacterized protein LOC100819579 (LOC100819579), mRNA	--	gi|356528876|ref|XM_003532976.1|	83.8	6e-13	PREDICTED: Glycine max uncharacterized protein LOC100819579 (LOC100819579), mRNA	--	--	--	--	-	GO:0008375//acetylglucosaminyltransferase activity	GO:0016020//membrane
gi|532806261|gb|GAHT01013341.1|	Unclassified	Unigene9457_All	0.1216	0.0013	0.0106	0.999999	gi|533090986|gb|GAHU01017980.1|	0.1827	0.0019	0.0106	0	#N/A	#N/A	#N/A	#N/A	#N/A	#N/A	#N/A	#N/A	#N/A	#N/A	#N/A	#N/A	#N/A	#N/A	#N/A	#N/A	#N/A
gi|532802258|gb|GAHT01017344.1|	Primary Metabolism	Unigene17735_All	0.2969	0.0038	0.0128	0.999999	gi|533092239|gb|GAHU01016727.1|	0.1487	0.0019	0.0126	0	gi|224074891|ref|XP_002304478.1|	578.6	7e-164	predicted protein [Populus trichocarpa] >gi|222841910|gb|EEE79457.1| predicted protein [Populus trichocarpa]	Malus x domestica UGE mRNA for UDP-galactose, complete cds	UDP-glucose 4-epimerase 1 OS=Arabidopsis thaliana GN=At1g12780 PE=1 SV=2	gi|139001603|dbj|AB272752.1|	226	4e-56	Malus x domestica UGE mRNA for UDP-galactose, complete cds	sp|Q42605|GALE1_ARATH	565	2e-161	UDP-glucose 4-epimerase 1 OS=Arabidopsis thaliana GN=At1g12780 PE=1 SV=2	GO:0009555//pollen development;GO:0046369//galactose biosynthetic process;GO:0006950//response to stress;GO:0044237//cellular metabolic process	GO:0046983//protein dimerization activity;GO:0003978//UDP-glucose 4-epimerase activity;GO:0050662//coenzyme binding;GO:0000166//nucleotide binding	GO:0005794//Golgi apparatus;GO:0005886//plasma membrane;GO:0005829//cytosol
gi|532786816|gb|GAHT01031451.1|	Transcription Factor	CL10722.Contig2_All	0.2236	0.0059	0.0265	0.999999	gi|533067379|gb|GAHU01041587.1|	0.0989	0.0014	0.0144	0	gi|359476570|ref|XP_002268619.2|	325.5	5e-88	PREDICTED: uncharacterized protein LOC100245437 [Vitis vinifera] >gi|297735022|emb|CBI17384.3| unnamed protein product [Vitis vinifera]	PREDICTED: Vitis vinifera uncharacterized LOC100245437 (LOC100245437), mRNA	RanBP2-type zinc finger protein At1g67325 OS=Arabidopsis thaliana GN=At1g67325 PE=1 SV=1	gi|359476569|ref|XM_002268583.2|	212	4e-52	PREDICTED: Vitis vinifera uncharacterized LOC100245437 (LOC100245437), mRNA	sp|Q8GZ43|YZR3_ARATH	54.3	8e-08	RanBP2-type zinc finger protein At1g67325 OS=Arabidopsis thaliana GN=At1g67325 PE=1 SV=1	-	GO:0005488//binding	GO:0005622//intracellular
gi|532750923|gb|GAHT01066447.1|	Primary Metabolism	CL19754.Contig2_All	0.1914	0.0041	0.0212	0.999999	gi|533021765|gb|GAHU01074365.1|	0.0831	0.0011	0.0129	0	gi|326519697|dbj|BAK00221.1|	481.5	1e-134	predicted protein [Hordeum vulgare subsp. vulgare]	PREDICTED: Glycine max l-2-hydroxyglutarate dehydrogenase, mitochondrial-like (LOC100798359), mRNA	--	gi|356514079|ref|XM_003525687.1|	79.8	8e-12	PREDICTED: Glycine max l-2-hydroxyglutarate dehydrogenase, mitochondrial-like (LOC100798359), mRNA	--	--	--	--	GO:0055114//oxidation-reduction process	GO:0047545//2-hydroxyglutarate dehydrogenase activity	GO:0005739//mitochondrion
gi|532750624|gb|GAHT01066746.1|	Transcription	Unigene20932_All	0.1612	0.0024	0.0146	0.999999	gi|533045810|gb|GAHU01061756.1|	0.0288	0.0006	0.0218	0	gi|357162876|ref|XP_003579552.1|	1036.2	0	PREDICTED: DNA excision repair protein ERCC-6-like [Brachypodium distachyon]	Oryza sativa Japonica Group cDNA, clone: J090067I06, full insert sequence	ATP-dependent DNA helicase DDM1 OS=Arabidopsis thaliana GN=DDM1 PE=1 SV=1	gi|116012193|dbj|AK242828.1|	252	2e-63	Oryza sativa Japonica Group cDNA, clone: J090067I06, full insert sequence	sp|Q9XFH4|DDM1_ARATH	252	1e-66	ATP-dependent DNA helicase DDM1 OS=Arabidopsis thaliana GN=DDM1 PE=1 SV=1	GO:0048519//negative regulation of biological process;GO:0051726//regulation of cell cycle;GO:0009887//organ morphogenesis;GO:0010051//xylem and phloem pattern formation;GO:0006270//DNA replication initiation;GO:0048439//flower morphogenesis;GO:0009855//determination of bilateral symmetry;GO:0008283//cell proliferation;GO:0006275//regulation of DNA replication;GO:0046686//response to cadmium ion	GO:0003677//DNA binding;GO:0005524//ATP binding;GO:0004386//helicase activity	GO:0005634//nucleus
gi|532776513|gb|GAHT01041754.1|	Unclassified	CL5661.Contig3_All	0.4967	0.0148	0.0298	0.999999	gi|533064240|gb|GAHU01044726.1|	0	0	0.0092	0	gi|357122900|ref|XP_003563151.1|	359.8	5e-98	PREDICTED: TVP38/TMEM64 family membrane protein slr0305-like [Brachypodium distachyon]	Phyllostachys edulis cDNA clone: bphylf040d22, full insert sequence	Uncharacterized membrane protein At4g09580 OS=Arabidopsis thaliana GN=At4g09580 PE=1 SV=1	gi|242384152|emb|FP092796.1|	131	2e-27	Phyllostachys edulis cDNA clone: bphylf040d22, full insert sequence	sp|Q8L586|Y4958_ARATH	53.1	4e-07	Uncharacterized membrane protein At4g09580 OS=Arabidopsis thaliana GN=At4g09580 PE=1 SV=1	GO:0006979//response to oxidative stress	-	GO:0005886//plasma membrane
gi|532756409|gb|GAHT01060961.1|	Unclassified	CL11465.Contig3_All	0.49	0.0107	0.0219	0.999999	gi|533083300|gb|GAHU01025666.1|	0	0	0.0107	0	gi|255550357|ref|XP_002516229.1|	317.4	2e-85	conserved hypothetical protein [Ricinus communis] >gi|223544715|gb|EEF46231.1| conserved hypothetical protein [Ricinus communis]	PREDICTED: Vitis vinifera uncharacterized LOC100256095 (LOC100256095), mRNA	--	gi|359484619|ref|XM_002277544.2|	153	5e-34	PREDICTED: Vitis vinifera uncharacterized LOC100256095 (LOC100256095), mRNA	--	--	--	--	-	-	-
gi|532776988|gb|GAHT01041279.1|	Unclassified	Unigene7512_All	0.3379	0.008	0.0238	0.999999	gi|533071051|gb|GAHU01037915.1|	0	0	0.0114	0	#N/A	#N/A	#N/A	#N/A	#N/A	#N/A	#N/A	#N/A	#N/A	#N/A	#N/A	#N/A	#N/A	#N/A	#N/A	#N/A	#N/A
gi|532800459|gb|GAHT01019143.1|	Protein Destination and Storage	Unigene32729_All	0.3213	0.0081	0.0251	0.999999	gi|533091053|gb|GAHU01017913.1|	0	0	0	0	gi|359483522|ref|XP_002273741.2|	118.6	2e-26	PREDICTED: uncharacterized protein LOC100266966 [Vitis vinifera]	PREDICTED: Brachypodium distachyon copper chaperone for superoxide dismutase-like (LOC100821407), mRNA	Heavy metal-associated isoprenylated plant protein 26 OS=Arabidopsis thaliana GN=HIPP26 PE=1 SV=1	gi|357136515|ref|XM_003569802.1|	60	2e-06	PREDICTED: Brachypodium distachyon copper chaperone for superoxide dismutase-like (LOC100821407), mRNA	sp|Q9SZN7|HIP26_ARATH	65.9	6e-12	Heavy metal-associated isoprenylated plant protein 26 OS=Arabidopsis thaliana GN=HIPP26 PE=1 SV=1	GO:0030001//metal ion transport	GO:0046872//metal ion binding	-
gi|532790442|gb|GAHT01027825.1|	Transcription Factor	CL4323.Contig5_All	0.2878	0.0128	0.0445	0.999999	gi|533063247|gb|GAHU01045719.1|	0	0	0.0319	0	gi|225441254|ref|XP_002273990.1|	265.4	1e-69	PREDICTED: two-component response regulator ARR9 [Vitis vinifera]	PREDICTED: Vitis vinifera two-component response regulator ARR9-like (LOC100253216), mRNA	Two-component response regulator ARR9 OS=Arabidopsis thaliana GN=ARR9 PE=1 SV=1	gi|359495030|ref|XM_002267368.2|	151	2e-33	PREDICTED: Vitis vinifera two-component response regulator ARR9-like (LOC100253216), mRNA	sp|O80366|ARR9_ARATH	231	5e-61	Two-component response regulator ARR9 OS=Arabidopsis thaliana GN=ARR9 PE=1 SV=1	GO:0000160//two-component signal transduction system (phosphorelay);GO:0035556//intracellular signal transduction;GO:0009735//response to cytokinin stimulus;GO:0006355//regulation of transcription, DNA-dependent	GO:0000156//two-component response regulator activity	GO:0043231//intracellular membrane-bounded organelle
gi|532780929|gb|GAHT01037338.1|	Unclassified	Unigene28627_All	0.198	0.0043	0.0217	0.999999	gi|533061344|gb|GAHU01047622.1|	0	0	0.0144	0	gi|297741804|emb|CBI33109.3|	222.6	7e-57	unnamed protein product [Vitis vinifera]	Solanum lycopersicum cDNA, clone: LEFL1074CF06, HTC in leaf	--	gi|225319689|dbj|AK324250.1|	85.7	8e-14	Solanum lycopersicum cDNA, clone: LEFL1074CF06, HTC in leaf	--	--	--	--	-	-	-
gi|532784575|gb|GAHT01033692.1|	Transcription	Unigene19994_All	0.1898	0.0046	0.0241	0.999999	gi|533092681|gb|GAHU01016285.1|	0	0	0.0079	0	gi|224101093|ref|XP_002312139.1|	359.4	3e-98	predicted protein [Populus trichocarpa] >gi|118485190|gb|ABK94456.1| unknown [Populus trichocarpa] >gi|222851959|gb|EEE89506.1| predicted protein [Populus trichocarpa]	Triticum aestivum cDNA, clone: WT002_E17, cultivar: Chinese Spring	Pollen-specific protein SF3 OS=Helianthus annuus GN=SF3 PE=2 SV=1	gi|241983819|dbj|AK331761.1|	254	1e-64	Triticum aestivum cDNA, clone: WT002_E17, cultivar: Chinese Spring	sp|P29675|SF3_HELAN	220	7e-58	Pollen-specific protein SF3 OS=Helianthus annuus GN=SF3 PE=2 SV=1	GO:0051017//actin filament bundle assembly	GO:0051015//actin filament binding;GO:0008270//zinc ion binding	-
gi|532803630|gb|GAHT01015972.1|	Unclassified	CL12008.Contig3_All	0.0778	0.0014	0.0175	0.999999	gi|533085498|gb|GAHU01023468.1|	0	0	0.0131	0	gi|225438613|ref|XP_002280917.1|	595.1	7e-169	PREDICTED: uncharacterized protein LOC100266317 [Vitis vinifera] >gi|296082473|emb|CBI21478.3| unnamed protein product [Vitis vinifera]	PREDICTED: Vitis vinifera uncharacterized LOC100266317 (LOC100266317), mRNA	--	gi|359480703|ref|XM_002280881.2|	351	1e-93	PREDICTED: Vitis vinifera uncharacterized LOC100266317 (LOC100266317), mRNA	--	--	--	--	-	GO:0008270//zinc ion binding	GO:0005737//cytoplasm
gi|532773923|gb|GAHT01044344.1|	Secondary metabolism	CL11544.Contig3_All	0.4033	0.0062	0.0155	1	gi|533073091|gb|GAHU01035875.1|	0.8037	0.006	0.0075	0	gi|359479028|ref|XP_002284705.2|	559.7	4e-158	PREDICTED: probable trans-2-enoyl-CoA reductase, mitochondrial [Vitis vinifera]	PREDICTED: Vitis vinifera probable trans-2-enoyl-CoA reductase, mitochondrial-like (LOC100257075), mRNA	Probable trans-2-enoyl-CoA reductase, mitochondrial OS=Arabidopsis thaliana GN=At3g45770 PE=1 SV=1	gi|359479027|ref|XM_002284669.2|	190	3e-45	PREDICTED: Vitis vinifera probable trans-2-enoyl-CoA reductase, mitochondrial-like (LOC100257075), mRNA	sp|Q8LCU7|MECR_ARATH	545	3e-155	Probable trans-2-enoyl-CoA reductase, mitochondrial OS=Arabidopsis thaliana GN=At3g45770 PE=1 SV=1	GO:0055114//oxidation-reduction process	GO:0016747//transferase activity, transferring acyl groups other than amino-acyl groups;GO:0019166//trans-2-enoyl-CoA reductase (NADPH) activity;GO:0005507//copper ion binding;GO:0005524//ATP binding;GO:0008270//zinc ion binding	GO:0009507//chloroplast;GO:0005634//nucleus;GO:0005739//mitochondrion
gi|532812799|gb|GAHT01008125.1|	Unclassified	CL9971.Contig2_All	0.2126	0.0268	0.1259	1	gi|533079561|gb|GAHU01029405.1|	0.7848	0.0833	0.1062	0	gi|115472937|ref|NP_001060067.1|	591.3	1e-167	Os07g0573400 [Oryza sativa Japonica Group] >gi|113611603|dbj|BAF21981.1| Os07g0573400 [Oryza sativa Japonica Group]	Oryza sativa Japonica Group Os07g0573400 (Os07g0573400) mRNA, complete cds	--	gi|115472936|ref|NM_001066602.1|	424	1e-116	Oryza sativa Japonica Group Os07g0573400 (Os07g0573400) mRNA, complete cds	--	--	--	--	-	-	GO:0016023//cytoplasmic membrane-bounded vesicle
gi|532785779|gb|GAHT01032488.1|	Unclassified	Unigene21031_All	0.4984	0.0036	0.0072	1	gi|533053261|gb|GAHU01055091.1|	0.7499	0.0039	0.0052	0	gi|326491867|dbj|BAJ98158.1|	950.3	0	predicted protein [Hordeum vulgare subsp. vulgare]	Oryza sativa Japonica Group Os01g0250900 (Os01g0250900) mRNA, complete cds	--	gi|115435677|ref|NM_001049132.1|	500	1e-138	Oryza sativa Japonica Group Os01g0250900 (Os01g0250900) mRNA, complete cds	--	--	--	--	-	GO:0046872//metal ion binding;GO:0008253//5'-nucleotidase activity	GO:0009570//chloroplast stroma
gi|532753574|gb|GAHT01063796.1|	Transcription	CL6843.Contig3_All	0.2681	0.0076	0.0282	1	gi|533054720|gb|GAHU01053632.1|	0.6795	0.0091	0.0134	0	gi|357152696|ref|XP_003576206.1|	239.6	1e-61	PREDICTED: B3 domain-containing protein Os11g0197600-like [Brachypodium distachyon]	--	B3 domain-containing protein Os11g0197600 OS=Oryza sativa subsp. japonica GN=Os11g0197600 PE=2 SV=1	--	--	--	--	sp|Q2R9D2|Y1176_ORYSJ	163	4e-40	B3 domain-containing protein Os11g0197600 OS=Oryza sativa subsp. japonica GN=Os11g0197600 PE=2 SV=1	-	-	-
gi|532776292|gb|GAHT01041975.1|	Unclassified	CL6952.Contig3_All	0.3045	0.0584	0.1917	1	gi|533056922|gb|GAHU01051798.1|	0.679	0.0619	0.0912	0	gi|225436904|ref|XP_002274278.1|	274.6	3e-72	PREDICTED: uncharacterized protein LOC100259706 [Vitis vinifera] >gi|296086692|emb|CBI32327.3| unnamed protein product [Vitis vinifera]	--	--	--	--	--	--	--	--	--	--	-	-	-
gi|532756778|gb|GAHT01060592.1|	Protein Destination and Storage	CL17883.Contig2_All	0	0	0.0124	1	gi|533006110|gb|GAHU01081794.1|	0.6058	0.0036	0.0059	0	gi|356525764|ref|XP_003531493.1|	318.5	1e-85	PREDICTED: sperm-associated antigen 1-like [Glycine max]	PREDICTED: Glycine max sperm-associated antigen 1-like (LOC100801778), mRNA	Peptidyl-prolyl cis-trans isomerase FKBP62 OS=Arabidopsis thaliana GN=FKBP62 PE=1 SV=2	gi|356525763|ref|XM_003531445.1|	184	1e-43	PREDICTED: Glycine max sperm-associated antigen 1-like (LOC100801778), mRNA	sp|Q38931|FKB62_ARATH	70.1	3e-12	Peptidyl-prolyl cis-trans isomerase FKBP62 OS=Arabidopsis thaliana GN=FKBP62 PE=1 SV=2	-	-	GO:0005737//cytoplasm
gi|532775153|gb|GAHT01043114.1|	Unclassified	Unigene3734_All	0.3719	0.0047	0.0126	1	gi|533053356|gb|GAHU01054996.1|	0.6036	0.0062	0.0103	0	gi|225426296|ref|XP_002265315.1|	686	0	PREDICTED: uncharacterized protein LOC100254675 [Vitis vinifera]	PREDICTED: Vitis vinifera uncharacterized LOC100254675 (LOC100254675), mRNA	Uncharacterized protein At4g10930 OS=Arabidopsis thaliana GN=At4g10930 PE=2 SV=1	gi|225426295|ref|XM_002265279.1|	93.7	1e-15	PREDICTED: Vitis vinifera uncharacterized LOC100254675 (LOC100254675), mRNA	sp|Q8L7I1|Y4193_ARATH	523	2e-148	Uncharacterized protein At4g10930 OS=Arabidopsis thaliana GN=At4g10930 PE=2 SV=1	GO:0044260;GO:0045491	-	-
gi|532725494|gb|GAHT01091247.1|	Signal Transdcution	CL19463.Contig2_All	0.1876	0.0161	0.0857	1	gi|533025789|gb|GAHU01072486.1|	0.5596	0.1152	0.2059	0	gi|224071247|ref|XP_002303381.1|	102.4	7e-21	predicted protein [Populus trichocarpa] >gi|222840813|gb|EEE78360.1| predicted protein [Populus trichocarpa]	--	Probable membrane-associated kinase regulator 1 OS=Arabidopsis thaliana GN=MAKR1 PE=1 SV=1	--	--	--	--	sp|Q3E936|MAKR1_ARATH	47.8	7e-06	Probable membrane-associated kinase regulator 1 OS=Arabidopsis thaliana GN=MAKR1 PE=1 SV=1	-	-	-
gi|532799720|gb|GAHT01019882.1|	Protein Destination and Storage	CL10875.Contig2_All	0.2042	0.0029	0.0141	1	gi|533091041|gb|GAHU01017925.1|	0.5437	0.0401	0.0738	0	gi|225438373|ref|XP_002274569.1|	725.7	0	PREDICTED: probable E3 ubiquitin-protein ligase HERC1 [Vitis vinifera] >gi|296082603|emb|CBI21608.3| unnamed protein product [Vitis vinifera]	PREDICTED: Vitis vinifera probable E3 ubiquitin-protein ligase HERC1-like (LOC100256038), mRNA	--	gi|225438372|ref|XM_002274533.1|	365	1e-97	PREDICTED: Vitis vinifera probable E3 ubiquitin-protein ligase HERC1-like (LOC100256038), mRNA	--	--	--	--	GO:0010224//response to UV-B;GO:0009649//entrainment of circadian clock;GO:0006007//glucose catabolic process	GO:0005085//guanyl-nucleotide exchange factor activity;GO:0003682//chromatin binding	GO:0000785//chromatin;GO:0005634//nucleus;GO:0005829//cytosol
gi|532790382|gb|GAHT01027885.1|	Unclassified	CL8728.Contig1_All	0.1501	0.0267	0.1779	1	gi|533062796|gb|GAHU01046170.1|	0.5002	0.0675	0.1349	0	gi|296081830|emb|CBI20835.3|	411.4	1e-113	unnamed protein product [Vitis vinifera]	Lotus japonicus cDNA, clone: LjFL1-033-AH06, HTC	--	gi|292744506|dbj|AK336902.1|	176	3e-41	Lotus japonicus cDNA, clone: LjFL1-033-AH06, HTC	--	--	--	--	GO:0010200//response to chitin	GO:0047372//acylglycerol lipase activity	GO:0009536//plastid
gi|532760116|gb|GAHT01057512.1|	Transporter	CL20183.Contig2_All	0.1873	0.0414	0.2209	1	gi|532944049|gb|GAHU01113383.1|	0.4424	0.0332	0.075	0	gi|225447945|ref|XP_002268924.1|	930.2	0	PREDICTED: potassium channel AKT2/3-like [Vitis vinifera]	PREDICTED: Vitis vinifera potassium channel AKT2/3-like (LOC100261806), mRNA	Potassium channel AKT2 OS=Oryza sativa subsp. japonica GN=Os05g0428700 PE=2 SV=1	gi|225447944|ref|XM_002268888.1|	178	2e-41	PREDICTED: Vitis vinifera potassium channel AKT2/3-like (LOC100261806), mRNA	sp|Q75HP9|AKT2_ORYSJ	910	0	Potassium channel AKT2 OS=Oryza sativa subsp. japonica GN=Os05g0428700 PE=2 SV=1	GO:0042391//regulation of membrane potential;GO:0055085//transmembrane transport;GO:0009737//response to abscisic acid stimulus;GO:0006813//potassium ion transport	GO:0005249//voltage-gated potassium channel activity	GO:0016021//integral to membrane
gi|532799962|gb|GAHT01019640.1|	Protein Destination and Storage	CL4261.Contig2_All	0.2999	0.0036	0.0118	1	gi|533085263|gb|GAHU01023703.1|	0.3988	0.026	0.0651	0	gi|357147180|ref|XP_003574249.1|	343.6	3e-93	PREDICTED: PPPDE peptidase domain-containing protein 1-like [Brachypodium distachyon]	PREDICTED: Vitis vinifera UPF0326 protein At4g17486-like (LOC100255969), mRNA	DeSI-like protein At4g17486 OS=Arabidopsis thaliana GN=At4g17486 PE=2 SV=1	gi|225464566|ref|XM_002273223.1|	119	6e-24	PREDICTED: Vitis vinifera UPF0326 protein At4g17486-like (LOC100255969), mRNA	sp|Q93VG8|PPDEX_ARATH	87	2e-17	DeSI-like protein At4g17486 OS=Arabidopsis thaliana GN=At4g17486 PE=2 SV=1	-	-	-
gi|532815026|gb|GAHT01005898.1|	Signal Transdcution	CL5910.Contig2_All	0.3841	0.0045	0.0116	1	gi|533101509|gb|GAHU01007457.1|	0.3856	0.0044	0.0115	0	gi|125581385|gb|EAZ22316.1|	1169.8	0	hypothetical protein OsJ_05971 [Oryza sativa Japonica Group]	Vitis vinifera, whole genome shotgun sequence, contig VV78X240627.13, clone ENTAV 115	Monosaccharide-sensing protein 2 OS=Arabidopsis thaliana GN=MSSP2 PE=2 SV=2	gi|123707309|emb|AM469045.1|	218	3e-53	Vitis vinifera, whole genome shotgun sequence, contig VV78X240627.13, clone ENTAV 115	sp|Q8LPQ8|MSSP2_ARATH	1048	0	Monosaccharide-sensing protein 2 OS=Arabidopsis thaliana GN=MSSP2 PE=2 SV=2	GO:0009624//response to nematode;GO:0055085//transmembrane transport;GO:0008643//carbohydrate transport;GO:0055114//oxidation-reduction process	GO:0005351//sugar:hydrogen symporter activity;GO:0032440//2-alkenal reductase [NAD(P)] activity	GO:0009705//plant-type vacuole membrane;GO:0005886//plasma membrane;GO:0016021//integral to membrane
gi|532769540|gb|GAHT01048727.1|	Transcription	Unigene10549_All	0.2412	0.0033	0.0138	1	gi|533050619|gb|GAHU01056947.1|	0.3742	0.0036	0.0097	0	gi|225445140|ref|XP_002280611.1|	616.3	4e-175	PREDICTED: CRS2-associated factor 1, chloroplastic [Vitis vinifera]	PREDICTED: Vitis vinifera CRS2-associated factor 1, chloroplastic-like (LOC100259402), mRNA	CRS2-associated factor 1, chloroplastic OS=Oryza sativa subsp. japonica GN=Os01g0495900 PE=2 SV=1	gi|359484554|ref|XM_002280575.2|	137	4e-29	PREDICTED: Vitis vinifera CRS2-associated factor 1, chloroplastic-like (LOC100259402), mRNA	sp|Q5VMQ5|CAF1P_ORYSJ	593	1e-169	CRS2-associated factor 1, chloroplastic OS=Oryza sativa subsp. japonica GN=Os01g0495900 PE=2 SV=1	GO:0006399//tRNA metabolic process;GO:0009658//chloroplast organization;GO:0006364//rRNA processing;GO:0000373//Group II intron splicing	-	GO:0009507//chloroplast
gi|532793023|gb|GAHT01025244.1|	Transcription Factor	CL7760.Contig1_All	0.5047	0.0068	0.0136	1	gi|533063948|gb|GAHU01045018.1|	0.3601	0.0049	0.0135	0	gi|224099315|ref|XP_002311435.1|	453.8	4e-126	NAC domain protein, IPR003441 [Populus trichocarpa] >gi|222851255|gb|EEE88802.1| NAC domain protein, IPR003441 [Populus trichocarpa]	PREDICTED: Vitis vinifera NAC domain-containing protein 8-like (LOC100266255), mRNA	NAC domain-containing protein 8 OS=Arabidopsis thaliana GN=NAC008 PE=2 SV=1	gi|359472995|ref|XM_002281486.2|	91.7	2e-15	PREDICTED: Vitis vinifera NAC domain-containing protein 8-like (LOC100266255), mRNA	sp|Q6NQK2|NAC8_ARATH	392	3e-109	NAC domain-containing protein 8 OS=Arabidopsis thaliana GN=NAC008 PE=2 SV=1	GO:0050794//regulation of cellular process	-	-
gi|532815868|gb|GAHT01005056.1|	Primary Metabolism	Unigene23477_All	0	0	0.0167	1	gi|533100315|gb|GAHU01008651.1|	0.3472	0.0014	0.0041	0	gi|225455706|ref|XP_002266571.1|	384.4	1e-105	PREDICTED: isoaspartyl peptidase/L-asparaginase 1 [Vitis vinifera] >gi|297734101|emb|CBI15348.3| unnamed protein product [Vitis vinifera]	PREDICTED: Vitis vinifera isoaspartyl peptidase/L-asparaginase 1-like (LOC100250923), mRNA	Isoaspartyl peptidase/L-asparaginase 1 OS=Arabidopsis thaliana GN=At5g08100 PE=1 SV=2	gi|359490897|ref|XM_002266535.2|	151	1e-33	PREDICTED: Vitis vinifera isoaspartyl peptidase/L-asparaginase 1-like (LOC100250923), mRNA	sp|P50287|ASPGA_ARATH	360	6e-100	Isoaspartyl peptidase/L-asparaginase 1 OS=Arabidopsis thaliana GN=At5g08100 PE=1 SV=2	GO:0033345//asparagine catabolic process via L-aspartate;GO:0006516//glycoprotein catabolic process;GO:0051604//protein maturation	GO:0004067//asparaginase activity	GO:0005829//cytosol
gi|532804727|gb|GAHT01014875.1|	Transporter	Unigene14015_All	0.3297	0.0028	0.0084	1	gi|533096292|gb|GAHU01012674.1|	0.3349	0.0012	0.0037	0	gi|357500677|ref|XP_003620627.1|	688.3	0	Sugar transporter [Medicago truncatula] >gi|355495642|gb|AES76845.1| Sugar transporter [Medicago truncatula]	PREDICTED: Glycine max probable plastidic glucose transporter 2-like, transcript variant 2 (LOC100801804), mRNA	Probable plastidic glucose transporter 2 OS=Arabidopsis thaliana GN=At1g67300 PE=2 SV=1	gi|356531286|ref|XM_003534161.1|	135	2e-28	PREDICTED: Glycine max probable plastidic glucose transporter 2-like, transcript variant 2 (LOC100801804), mRNA	sp|Q9FYG3|PLST2_ARATH	637	0	Probable plastidic glucose transporter 2 OS=Arabidopsis thaliana GN=At1g67300 PE=2 SV=1	GO:0055085//transmembrane transport;GO:0008643//carbohydrate transport;GO:0055114//oxidation-reduction process	GO:0005351//sugar:hydrogen symporter activity;GO:0032440//2-alkenal reductase [NAD(P)] activity	GO:0016021//integral to membrane
gi|532811057|gb|GAHT01009867.1|	Unclassified	CL14724.Contig2_All	0.6682	0.0046	0.007	1	gi|533097576|gb|GAHU01011390.1|	0.3339	0.0023	0.007	0	gi|359495228|ref|XP_002277528.2|	334.7	2e-90	PREDICTED: uncharacterized protein LOC100253453 [Vitis vinifera]	--	Glutenin, high molecular weight subunit DY10 OS=Triticum aestivum GN=GLU-D1-2B PE=3 SV=1	--	--	--	--	sp|P10387|GLT0_WHEAT	114	1e-25	Glutenin, high molecular weight subunit DY10 OS=Triticum aestivum GN=GLU-D1-2B PE=3 SV=1	-	-	-
gi|532811925|gb|GAHT01008999.1|	Secondary metabolism	Unigene30251_All	0.6708	0.0036	0.0053	1	gi|533101096|gb|GAHU01007870.1|	0.3334	0.0018	0.0053	0	gi|379995855|gb|AFD23289.1|	428.3	1e-118	tropinone reductase II, partial [Dendrobium nobile]	Dendrobium nobile tropinone reductase II (TRII) mRNA, partial cds	Tropinone reductase homolog At1g07440 OS=Arabidopsis thaliana GN=At1g07440 PE=1 SV=1	gi|379995854|gb|JQ063459.1|	145	1e-31	Dendrobium nobile tropinone reductase II (TRII) mRNA, partial cds	sp|Q9ASX2|TRNH1_ARATH	339	2e-93	Tropinone reductase homolog At1g07440 OS=Arabidopsis thaliana GN=At1g07440 PE=1 SV=1	GO:0055114//oxidation-reduction process	GO:0000166//nucleotide binding;GO:0050356	GO:0005829//cytosol
gi|532773554|gb|GAHT01044713.1|	Cell Structure	Unigene17527_All	0.2446	0.0025	0.0101	1	gi|533064193|gb|GAHU01044773.1|	0.333	0.003	0.0089	0	gi|115478080|ref|NP_001062635.1|	1265.8	0	Os09g0134500 [Oryza sativa Japonica Group] >gi|47848462|dbj|BAD22318.1| trithorax-like [Oryza sativa Japonica Group] >gi|113630868|dbj|BAF24549.1| Os09g0134500 [Oryza sativa Japonica Group]	Populus trichocarpa SET domain protein (SDG937), mRNA	Histone-lysine N-methyltransferase ATX1 OS=Arabidopsis thaliana GN=ATX1 PE=1 SV=2	gi|224065043|ref|XM_002301607.1|	307	4e-80	Populus trichocarpa SET domain protein (SDG937), mRNA	sp|Q9C5X4|ATX1_ARATH	1120	0	Histone-lysine N-methyltransferase ATX1 OS=Arabidopsis thaliana GN=ATX1 PE=1 SV=2	GO:0031047//gene silencing by RNA;GO:0006261//DNA-dependent DNA replication;GO:0051567//histone H3-K9 methylation;GO:0010093//specification of floral organ identity;GO:0006342//chromatin silencing;GO:0009965//leaf morphogenesis;GO:0006306//DNA methylation;GO:0051568//histone H3-K4 methylation;GO:0016572//histone phosphorylation;GO:0009909//regulation of flower development	GO:0046872//metal ion binding;GO:0044212//transcription regulatory region DNA binding;GO:0042800//histone methyltransferase activity (H3-K4 specific);GO:0010314//phosphatidylinositol-5-phosphate binding	GO:0000785//chromatin;GO:0005737//cytoplasm;GO:0005886//plasma membrane;GO:0005634//nucleus
gi|532796727|gb|GAHT01022845.1|	Unclassified	CL3783.Contig1_All	0	0	0.0226	1	gi|533074714|gb|GAHU01034252.1|	0.3282	0.0025	0.0076	0	gi|357520809|ref|XP_003630693.1|	374.8	1e-102	Derlin-1 [Medicago truncatula] >gi|355524715|gb|AET05169.1| Derlin-1 [Medicago truncatula]	PREDICTED: Vitis vinifera derlin-1-like (LOC100250894), mRNA	Derlin-1 OS=Oryza sativa subsp. japonica GN=DER1 PE=2 SV=2	gi|359476136|ref|XM_002275202.2|	135	1e-28	PREDICTED: Vitis vinifera derlin-1-like (LOC100250894), mRNA	sp|Q06397|DERL1_ORYSJ	370	6e-103	Derlin-1 OS=Oryza sativa subsp. japonica GN=DER1 PE=2 SV=2	GO:0009750//response to fructose stimulus;GO:0007010//cytoskeleton organization;GO:0006094//gluconeogenesis;GO:0010218//response to far red light;GO:0006457//protein folding;GO:0042542//response to hydrogen peroxide;GO:0006833//water transport;GO:0009825//multidimensional cell growth;GO:0010114//response to red light;GO:0006816//calcium ion transport;GO:0009651//response to salt stress;GO:0010498…	GO:0005515//protein binding;GO:0005200//structural constituent of cytoskeleton	GO:0016021//integral to membrane;GO:0009507//chloroplast;GO:0005789//endoplasmic reticulum membrane;GO:0005829//cytosol;GO:0005634//nucleus
gi|532776603|gb|GAHT01041664.1|	Protein Synthesis	CL10907.Contig1_All	0.4898	0.0029	0.0059	1	gi|533075889|gb|GAHU01033077.1|	0.3267	0.001	0.0029	0	gi|242095038|ref|XP_002438009.1|	793.9	0	hypothetical protein SORBIDRAFT_10g006430 [Sorghum bicolor] >gi|241916232|gb|EER89376.1| hypothetical protein SORBIDRAFT_10g006430 [Sorghum bicolor]	PREDICTED: Vitis vinifera 3-oxoacyl-[acyl-carrier-protein] synthase I, chloroplastic-like (LOC100258842), mRNA	3-oxoacyl-[acyl-carrier-protein] synthase I, chloroplastic OS=Hordeum vulgare GN=KAS12 PE=1 SV=1	gi|359483853|ref|XM_002272838.2|	779	0	PREDICTED: Vitis vinifera 3-oxoacyl-[acyl-carrier-protein] synthase I, chloroplastic-like (LOC100258842), mRNA	sp|P23902|KASC1_HORVU	766	0	3-oxoacyl-[acyl-carrier-protein] synthase I, chloroplastic OS=Hordeum vulgare GN=KAS12 PE=1 SV=1	GO:0009790//embryo development;GO:0006633//fatty acid biosynthetic process;GO:0010020//chloroplast fission	GO:0004315//3-oxoacyl-[acyl-carrier-protein] synthase activity	GO:0009941//chloroplast envelope;GO:0009570//chloroplast stroma;GO:0016020//membrane
gi|532753506|gb|GAHT01063864.1|	Transcription	Unigene33767_All	0	0	0.0053	1	gi|533094800|gb|GAHU01014166.1|	0.3266	0.0013	0.0039	0	gi|356546579|ref|XP_003541702.1|	77	4e-13	PREDICTED: splicing factor 3B subunit 1-like [Glycine max]	--	--	--	--	--	--	--	--	--	--	-	-	-
gi|532766145|gb|GAHT01052122.1|	Signal Transdcution	Unigene6029_All	0	0	0.0204	1	gi|533035138|gb|GAHU01068146.1|	0.3195	0.002	0.0062	0	gi|357163048|ref|XP_003579608.1|	410.2	2e-113	PREDICTED: SNF1-related protein kinase regulatory subunit gamma-1-like [Brachypodium distachyon]	Triticum aestivum cDNA, clone: WT009_I05, cultivar: Chinese Spring	SNF1-related protein kinase regulatory subunit gamma-1 OS=Arabidopsis thaliana GN=KING1 PE=1 SV=2	gi|241986844|dbj|AK334105.1|	117	2e-23	Triticum aestivum cDNA, clone: WT009_I05, cultivar: Chinese Spring	sp|Q8LBB2|KING1_ARATH	355	3e-98	SNF1-related protein kinase regulatory subunit gamma-1 OS=Arabidopsis thaliana GN=KING1 PE=1 SV=2	GO:0008152//metabolic process	GO:0003824//catalytic activity	-
gi|532783651|gb|GAHT01034616.1|	Primary Metabolism	CL3661.Contig2_All	0	0	0	1	gi|533064398|gb|GAHU01044568.1|	0.3194	0.0016	0.0049	0	gi|218202596|gb|EEC85023.1|	320.9	2e-86	hypothetical protein OsI_32323 [Oryza sativa Indica Group] >gi|222642057|gb|EEE70189.1| hypothetical protein OsJ_30270 [Oryza sativa Japonica Group]	PREDICTED: Glycine max nudix hydrolase 23, chloroplastic-like (LOC100783108), mRNA	Nudix hydrolase 23, chloroplastic OS=Arabidopsis thaliana GN=NUDT23 PE=1 SV=2	gi|356503480|ref|XM_003520488.1|	83.8	4e-13	PREDICTED: Glycine max nudix hydrolase 23, chloroplastic-like (LOC100783108), mRNA	sp|P93740|NUD23_ARATH	291	7e-79	Nudix hydrolase 23, chloroplastic OS=Arabidopsis thaliana GN=NUDT23 PE=1 SV=2	GO:0042726//flavin-containing compound metabolic process;GO:0009416//response to light stimulus	GO:0047884//FAD diphosphatase activity	GO:0009507//chloroplast;GO:0005739//mitochondrion
gi|532760775|gb|GAHT01057106.1|	Cell Structure	CL1821.Contig2_All	0.1595	0.0013	0.0084	1	gi|533082625|gb|GAHU01026341.1|	0.3179	0.0027	0.0084	0	gi|359483871|ref|XP_002276286.2|	595.1	1e-168	PREDICTED: katanin p60 ATPase-containing subunit A-like 2 [Vitis vinifera]	PREDICTED: Vitis vinifera katanin p60 ATPase-containing subunit A-like 2 (LOC100253260), mRNA	Katanin p60 ATPase-containing subunit OS=Arabidopsis thaliana GN=AAA1 PE=1 SV=1	gi|359483870|ref|XM_002276250.2|	468	1e-128	PREDICTED: Vitis vinifera katanin p60 ATPase-containing subunit A-like 2 (LOC100253260), mRNA	sp|Q9SEX2|KTNA1_ARATH	286	4e-77	Katanin p60 ATPase-containing subunit OS=Arabidopsis thaliana GN=AAA1 PE=1 SV=1	-	GO:0008568//microtubule-severing ATPase activity;GO:0005524//ATP binding	-
gi|532799865|gb|GAHT01019737.1|	Unclassified	Unigene52413_All	0.6444	0.0057	0.0088	1	gi|533073422|gb|GAHU01035544.1|	0.3156	0.0022	0.0069	0	gi|222630358|gb|EEE62490.1|	279.3	5e-74	hypothetical protein OsJ_17287 [Oryza sativa Japonica Group]	Phyllostachys edulis cDNA clone: bphyem207c13, full insert sequence	--	gi|242383354|emb|FP097550.1|	202	4e-49	Phyllostachys edulis cDNA clone: bphyem207c13, full insert sequence	--	--	--	--	-	-	GO:0009536//plastid
gi|532814146|gb|GAHT01006778.1|	Energy	Unigene6063_All	0	0	0.0041	1	gi|533106258|gb|GAHU01002708.1|	0.3107	0.0013	0.0041	0	gi|225434189|ref|XP_002279359.1|	521.9	8e-147	PREDICTED: NADP-dependent alkenal double bond reductase P2 [Vitis vinifera] >gi|147792339|emb|CAN61471.1| hypothetical protein VITISV_043825 [Vitis vinifera]	Arabidopsis thaliana 2-alkenal reductase (AT5G16980) mRNA, complete cds	NADP-dependent alkenal double bond reductase P2 OS=Arabidopsis thaliana GN=P2 PE=2 SV=2	gi|334187721|ref|NM_001203393.1|	230	3e-57	Arabidopsis thaliana 2-alkenal reductase (AT5G16980) mRNA, complete cds	sp|Q39173|P2_ARATH	494	4e-140	NADP-dependent alkenal double bond reductase P2 OS=Arabidopsis thaliana GN=P2 PE=2 SV=2	GO:0006979//response to oxidative stress;GO:0055114//oxidation-reduction process;GO:0030036//actin cytoskeleton organization;GO:0009860//pollen tube growth;GO:0015824//proline transport;GO:0010583//response to cyclopentenone;GO:0046686//response to cadmium ion;GO:0009407//toxin catabolic process;GO:0030048//actin filament-based movement;GO:0009827//plant-type cell wall modification	GO:0016747//transferase activity, transferring acyl groups other than amino-acyl groups;GO:0008270//zinc ion binding;GO:0000166//nucleotide binding;GO:0032440//2-alkenal reductase [NAD(P)] activity	GO:0005829//cytosol;GO:0005634//nucleus;GO:0005886//plasma membrane
gi|532754853|gb|GAHT01062517.1|	Intracellular traffic	Unigene16535_All	0.1518	0.0021	0.0138	1	gi|533044906|gb|GAHU01062660.1|	0.305	0.0042	0.0138	0	gi|225453969|ref|XP_002280265.1|	301.6	9e-81	PREDICTED: vesicle-associated protein 1-3 [Vitis vinifera] >gi|296089177|emb|CBI38880.3| unnamed protein product [Vitis vinifera]	PREDICTED: Vitis vinifera vesicle-associated protein 1-3-like (LOC100253897), mRNA	Vesicle-associated protein 1-3 OS=Arabidopsis thaliana GN=PVA13 PE=2 SV=1	gi|359489432|ref|XM_002280229.2|	143	3e-31	PREDICTED: Vitis vinifera vesicle-associated protein 1-3-like (LOC100253897), mRNA	sp|Q84WW5|VAP13_ARATH	292	2e-79	Vesicle-associated protein 1-3 OS=Arabidopsis thaliana GN=PVA13 PE=2 SV=1	GO:0006499//N-terminal protein myristoylation	GO:0005198//structural molecule activity	GO:0005783//endoplasmic reticulum;GO:0044425//membrane part
gi|532790522|gb|GAHT01027745.1|	Transporter	CL1696.Contig2_All	0.2276	0.0029	0.0126	1	gi|533076224|gb|GAHU01032742.1|	0.3034	0.0019	0.0063	0	gi|222623230|gb|EEE57362.1|	580.1	4e-164	hypothetical protein OsJ_07508 [Oryza sativa Japonica Group]	PREDICTED: Vitis vinifera calcium uptake protein 1, mitochondrial-like (LOC100246594), mRNA	--	gi|225463064|ref|XM_002266084.1|	123	7e-25	PREDICTED: Vitis vinifera calcium uptake protein 1, mitochondrial-like (LOC100246594), mRNA	--	--	--	--	-	GO:0005509//calcium ion binding	GO:0016023//cytoplasmic membrane-bounded vesicle;GO:0009536//plastid
gi|532798732|gb|GAHT01020870.1|	Cell Structure	CL10761.Contig2_All	0.1497	0.0014	0.0091	1	gi|533063106|gb|GAHU01045860.1|	0.3016	0.0013	0.0043	0	gi|222637358|gb|EEE67490.1|	359	9e-98	hypothetical protein OsJ_24918 [Oryza sativa Japonica Group]	Arabidopsis thaliana protein ZCW7 (ZCW7) mRNA, complete cds	Leucine-rich repeat extensin-like protein 5 OS=Arabidopsis thaliana GN=LRX5 PE=2 SV=2	gi|145336870|ref|NM_104653.3|	107	3e-20	Arabidopsis thaliana protein ZCW7 (ZCW7) mRNA, complete cds	sp|Q9SN46|LRX5_ARATH	66.2	4e-11	Leucine-rich repeat extensin-like protein 5 OS=Arabidopsis thaliana GN=LRX5 PE=2 SV=2	-	-	GO:0005634//nucleus
gi|532803253|gb|GAHT01016349.1|	Signal Transdcution	Unigene10644_All	0.5992	0.002	0.0033	1	gi|533093844|gb|GAHU01015122.1|	0.2971	0.002	0.0066	0	gi|255567051|ref|XP_002524508.1|	693	0	CBL-interacting serine/threonine-protein kinase, putative [Ricinus communis] >gi|223536296|gb|EEF37948.1| CBL-interacting serine/threonine-protein kinase, putative [Ricinus communis]	Vitis vinifera CBL-interacting protein kinase 09 (CIPK09) mRNA, complete cds	CBL-interacting protein kinase 24 OS=Oryza sativa subsp. japonica GN=CIPK24 PE=1 SV=1	gi|229609818|gb|FJ901237.1|	176	5e-41	Vitis vinifera CBL-interacting protein kinase 09 (CIPK09) mRNA, complete cds	sp|Q69Q47|CIPKO_ORYSJ	682	0	CBL-interacting protein kinase 24 OS=Oryza sativa subsp. japonica GN=CIPK24 PE=1 SV=1	GO:0006468//protein phosphorylation;GO:0009651//response to salt stress;GO:0007165//signal transduction	GO:0005524//ATP binding;GO:0005515//protein binding;GO:0004683//calmodulin-dependent protein kinase activity	GO:0009705//plant-type vacuole membrane;GO:0005886//plasma membrane
gi|532765056|gb|GAHT01053211.1|	Signal Transdcution	CL19126.Contig2_All	0.2227	0.0049	0.0222	1	gi|533057414|gb|GAHU01051306.1|	0.2966	0.0016	0.0054	0	gi|300245060|gb|ADJ94125.1|	403.3	3e-111	guanylyl cyclase [Hippeastrum hybrid cultivar]	Hippeastrum hybrid cultivar guanylyl cyclase (GC1) mRNA, complete cds	--	gi|300245059|gb|HM481265.1|	498	1e-138	Hippeastrum hybrid cultivar guanylyl cyclase (GC1) mRNA, complete cds	--	--	--	--	GO:0006098//pentose-phosphate shunt;GO:0019288//isopentenyl diphosphate biosynthetic process, mevalonate-independent pathway;GO:0016117//carotenoid biosynthetic process;GO:0010027//thylakoid membrane organization;GO:0000956//nuclear-transcribed mRNA catabolic process;GO:0010020//chloroplast fission	-	GO:0009941//chloroplast envelope;GO:0005794//Golgi apparatus
gi|532794335|gb|GAHT01023932.1|	Protein Destination and Storage	Unigene149_All	0.292	0.0012	0.0042	1	gi|533070024|gb|GAHU01038942.1|	0.2939	0.0016	0.0054	0	gi|359483452|ref|XP_002270330.2|	1087	0	PREDICTED: E3 ubiquitin-protein ligase COP1-like [Vitis vinifera]	Oryza sativa Japonica Group Os02g0771100 (Os02g0771100) mRNA, complete cds	E3 ubiquitin-protein ligase COP1 OS=Arabidopsis thaliana GN=COP1 PE=1 SV=2	gi|115448948|ref|NM_001054789.1|	545	1e-152	Oryza sativa Japonica Group Os02g0771100 (Os02g0771100) mRNA, complete cds	sp|P43254|COP1_ARATH	1001	0	E3 ubiquitin-protein ligase COP1 OS=Arabidopsis thaliana GN=COP1 PE=1 SV=2	GO:0046283//anthocyanin-containing compound metabolic process;GO:0055114//oxidation-reduction process;GO:0006281//DNA repair;GO:0010100//negative regulation of photomorphogenesis;GO:0048573//photoperiodism, flowering;GO:0009647//skotomorphogenesis;GO:0010119//regulation of stomatal movement;GO:0009649//entrainment of circadian clock;GO:0016567//protein ubiquitination;GO:0009641//shade avoidance	GO:0008270//zinc ion binding;GO:0004842//ubiquitin-protein ligase activity;GO:0005515//protein binding;GO:0032440//2-alkenal reductase [NAD(P)] activity	GO:0080008//Cul4-RING ubiquitin ligase complex;GO:0000152//nuclear ubiquitin ligase complex
gi|532773827|gb|GAHT01044440.1|	Unclassified	CL17438.Contig2_All	0.23	0.0045	0.0195	1	gi|533060030|gb|GAHU01048936.1|	0.2936	0.0041	0.0138	0	gi|359474026|ref|XP_002276624.2|	1068.1	0	PREDICTED: uncharacterized protein LOC100259829 [Vitis vinifera]	Sorghum bicolor hypothetical protein, mRNA	--	gi|242076839|ref|XM_002448311.1|	77.8	7e-11	Sorghum bicolor hypothetical protein, mRNA	--	--	--	--	GO:0009987//cellular process;GO:0006810//transport;GO:0016043//cellular component organization	-	GO:0009506//plasmodesma
gi|532702233|gb|GAHT01114508.1|	Cell growth/division	Unigene31689_All	0.105	0.0012	0.011	1	gi|533001571|gb|GAHU01084267.1|	0.292	0.0147	0.0503	0	gi|357164171|ref|XP_003579971.1|	604.4	1e-171	PREDICTED: pachytene checkpoint protein 2 homolog [Brachypodium distachyon]	Phyllostachys edulis cDNA clone: bphyem208a05, full insert sequence	Pachytene checkpoint protein 2 homolog OS=Oryza sativa subsp. japonica GN=Os04g0479000 PE=3 SV=3	gi|242386332|emb|FP098937.1|	533	1e-148	Phyllostachys edulis cDNA clone: bphyem208a05, full insert sequence	sp|Q7XK25|PCH2_ORYSJ	600	8e-172	Pachytene checkpoint protein 2 homolog OS=Oryza sativa subsp. japonica GN=Os04g0479000 PE=3 SV=3	GO:0006468//protein phosphorylation;GO:0006096//glycolysis;GO:0006094//gluconeogenesis	GO:0004672//protein kinase activity;GO:0004347//glucose-6-phosphate isomerase activity;GO:0005524//ATP binding;GO:0008568//microtubule-severing ATPase activity;GO:0003697//single-stranded DNA binding	GO:0009536//plastid;GO:0005886//plasma membrane
gi|532762601|gb|GAHT01055666.1|	Cell Structure	Unigene19917_All	0.1869	0.0026	0.0141	1	gi|533057888|gb|GAHU01050832.1|	0.2908	0.0036	0.0124	0	gi|356534361|ref|XP_003535724.1|	607.1	2e-172	PREDICTED: putative membrane-bound O-acyltransferase C24H6.01c-like [Glycine max]	Populus trichocarpa membrane bound o-acyl transferase, mRNA	--	gi|224122797|ref|XM_002318880.1|	188	1e-44	Populus trichocarpa membrane bound o-acyl transferase, mRNA	--	--	--	--	GO:0006944//cellular membrane fusion;GO:0006891//intra-Golgi vesicle-mediated transport	GO:0016746//transferase activity, transferring acyl groups	GO:0016021//integral to membrane;GO:0005739//mitochondrion
gi|532784026|gb|GAHT01034241.1|	Cell Structure	CL2363.Contig3_All	0.3867	0.0054	0.0141	1	gi|533087812|gb|GAHU01021154.1|	0.2903	0.0013	0.0046	0	gi|357133870|ref|XP_003568545.1|	377.9	1e-103	PREDICTED: annexin D3-like [Brachypodium distachyon]	Solanum lycopersicum cDNA, clone: LEFL1009CD05, HTC in leaf	Annexin D3 OS=Arabidopsis thaliana GN=ANN3 PE=2 SV=2	gi|225313315|dbj|AK320459.1|	69.9	5e-09	Solanum lycopersicum cDNA, clone: LEFL1009CD05, HTC in leaf	sp|Q9SE45|ANXD3_ARATH	319	2e-87	Annexin D3 OS=Arabidopsis thaliana GN=ANN3 PE=2 SV=2	GO:0009414//response to water deprivation;GO:0009409//response to cold;GO:0009408//response to heat;GO:0009651//response to salt stress	GO:0005509//calcium ion binding;GO:0005544//calcium-dependent phospholipid binding	GO:0009986//cell surface;GO:0005773//vacuole;GO:0009507//chloroplast
gi|532775041|gb|GAHT01043226.1|	Energy	Unigene10710_All	0.0731	0.0015	0.0199	1	gi|533035817|gb|GAHU01067791.1|	0.2895	0.0027	0.0092	0	gi|356513642|ref|XP_003525520.1|	448.4	7e-125	PREDICTED: manganese-dependent ADP-ribose/CDP-alcohol diphosphatase-like [Glycine max]	Populus trichocarpa predicted protein, mRNA	Manganese-dependent ADP-ribose/CDP-alcohol diphosphatase OS=Oryza sativa subsp. japonica GN=Os07g0688000 PE=2 SV=1	gi|224121837|ref|XM_002318649.1|	69.9	5e-09	Populus trichocarpa predicted protein, mRNA	sp|Q8H5F8|ADPRM_ORYSJ	415	2e-116	Manganese-dependent ADP-ribose/CDP-alcohol diphosphatase OS=Oryza sativa subsp. japonica GN=Os07g0688000 PE=2 SV=1	-	GO:0004722//protein serine/threonine phosphatase activity	GO:0005886//plasma membrane
gi|532805879|gb|GAHT01013723.1|	Unclassified	Unigene66709_All	0.3629	0.0114	0.0314	1	gi|533085809|gb|GAHU01023157.1|	0.2884	0.0113	0.0391	0	gi|225456515|ref|XP_002284699.1|	238.4	5e-62	PREDICTED: uncharacterized protein LOC100259528 [Vitis vinifera]	PREDICTED: Glycine max uncharacterized protein LOC100812204 (LOC100812204), mRNA	--	gi|356512933|ref|XM_003525121.1|	95.6	5e-17	PREDICTED: Glycine max uncharacterized protein LOC100812204 (LOC100812204), mRNA	--	--	--	--	-	GO:0005506//iron ion binding	GO:0009536//plastid
gi|532815776|gb|GAHT01005148.1|	Unclassified	Unigene9547_All	0.5695	0.0047	0.0082	1	gi|533108265|gb|GAHU01000701.1|	0.2838	0.0023	0.0082	0	#N/A	#N/A	#N/A	#N/A	#N/A	#N/A	#N/A	#N/A	#N/A	#N/A	#N/A	#N/A	#N/A	#N/A	#N/A	#N/A	#N/A
gi|532775580|gb|GAHT01042687.1|	Unclassified	Unigene17638_All	0.5652	0.0063	0.0111	1	gi|533065031|gb|GAHU01043935.1|	0.279	0.0072	0.0257	0	gi|115441643|ref|NP_001045101.1|	500.4	3e-140	Os01g0899500 [Oryza sativa Japonica Group] >gi|113534632|dbj|BAF07015.1| Os01g0899500 [Oryza sativa Japonica Group]	Solanum lycopersicum cDNA, clone: LEFL2003CH07, HTC in fruit	Uncharacterized protein At3g49140 OS=Arabidopsis thaliana GN=At3g49140 PE=1 SV=2	gi|225322252|dbj|AK326268.1|	73.8	5e-10	Solanum lycopersicum cDNA, clone: LEFL2003CH07, HTC in fruit	sp|Q0WMN5|Y3913_ARATH	193	2e-49	Uncharacterized protein At3g49140 OS=Arabidopsis thaliana GN=At3g49140 PE=1 SV=2	-	-	-
gi|532769740|gb|GAHT01048527.1|	Unclassified	Unigene16124_All	0.2779	0.0172	0.0619	1	gi|533060726|gb|GAHU01048240.1|	0.2729	0.0058	0.0213	0	gi|225441927|ref|XP_002284555.1|	130.2	1e-29	PREDICTED: uncharacterized protein LOC100265785 isoform 2 [Vitis vinifera] >gi|225441929|ref|XP_002284557.1| PREDICTED: uncharacterized protein LOC100265785 isoform 3 [Vitis vinifera] >gi|225441931|ref|XP_002284553.1| PREDICTED: uncharacterized protein LOC100265785 isoform 1 [Vitis vinifera] >gi|296087053|emb|CBI33380.3| unnamed protein product [Vitis vinifera]	PREDICTED: Glycine max uncharacterized protein LOC100797053, transcript variant 2 (LOC100797053), mRNA	--	gi|356504757|ref|XM_003521114.1|	69.9	3e-09	PREDICTED: Glycine max uncharacterized protein LOC100797053, transcript variant 2 (LOC100797053), mRNA	--	--	--	--	-	-	GO:0005634//nucleus
gi|532762857|gb|GAHT01055410.1|	Unclassified	CL16215.Contig1_All	0.3015	0.0042	0.0138	1	gi|533063943|gb|GAHU01045023.1|	0.2512	0.0052	0.0205	0	gi|115485651|ref|NP_001067969.1|	555.8	7e-157	Os11g0514800 [Oryza sativa Japonica Group] >gi|77551091|gb|ABA93888.1| expressed protein [Oryza sativa Japonica Group] >gi|113645191|dbj|BAF28332.1| Os11g0514800 [Oryza sativa Japonica Group]	--	--	--	--	--	--	--	--	--	--	-	-	GO:0005773//vacuole
gi|532805345|gb|GAHT01014257.1|	Unclassified	Unigene32053_All	0.3939	0.0047	0.012	1	gi|533090511|gb|GAHU01018455.1|	0.2208	0.0035	0.0159	0	gi|225426146|ref|XP_002278325.1|	436.4	5e-121	PREDICTED: uncharacterized protein LOC100246733 isoform 1 [Vitis vinifera] >gi|297742242|emb|CBI34391.3| unnamed protein product [Vitis vinifera]	Zea mays full-length cDNA clone ZM_BFc0008A07 mRNA, complete cds	--	gi|194707199|gb|BT042679.1|	149	9e-33	Zea mays full-length cDNA clone ZM_BFc0008A07 mRNA, complete cds	--	--	--	--	-	-	GO:0005622//intracellular
gi|532791301|gb|GAHT01026966.1|	Primary Metabolism	Unigene14643_All	0.1283	0.0023	0.0182	1	gi|533043725|gb|GAHU01063840.1|	0.2141	0.0023	0.0105	0	gi|225430001|ref|XP_002284106.1|	498.4	1e-139	PREDICTED: branched-chain-amino-acid aminotransferase-like protein 3, chloroplastic [Vitis vinifera] >gi|296081877|emb|CBI20882.3| unnamed protein product [Vitis vinifera]	PREDICTED: Vitis vinifera branched-chain-amino-acid aminotransferase-like protein 3, chloroplastic (LOC100266456), mRNA	Branched-chain-amino-acid aminotransferase-like protein 3, chloroplastic OS=Arabidopsis thaliana GN=At5g57850 PE=2 SV=1	gi|225430000|ref|XM_002284070.1|	123	5e-25	PREDICTED: Vitis vinifera branched-chain-amino-acid aminotransferase-like protein 3, chloroplastic (LOC100266456), mRNA	sp|Q8L493|BCAL3_ARATH	426	2e-119	Branched-chain-amino-acid aminotransferase-like protein 3, chloroplastic OS=Arabidopsis thaliana GN=At5g57850 PE=2 SV=1	GO:0008153//para-aminobenzoic acid biosynthetic process;GO:0046654//tetrahydrofolate biosynthetic process	GO:0008696//4-amino-4-deoxychorismate lyase activity;GO:0047810//D-alanine:2-oxoglutarate aminotransferase activity	GO:0009570//chloroplast stroma
gi|532763614|gb|GAHT01054653.1|	Transcription	CL9059.Contig2_All	0.2106	0.0439	0.2084	1	gi|533005544|gb|GAHU01082041.1|	0.199	0.0088	0.0443	0	gi|255582593|ref|XP_002532079.1|	418.3	1e-115	exosome complex exonuclease rrp43, putative [Ricinus communis] >gi|223528261|gb|EEF30313.1| exosome complex exonuclease rrp43, putative [Ricinus communis]	Solanum tuberosum clone 142D11 3'-5'-exoribonuclease/RNA binding-like protein mRNA, complete cds	--	gi|83283986|gb|DQ294269.1|	83.8	4e-13	Solanum tuberosum clone 142D11 3'-5'-exoribonuclease/RNA binding-like protein mRNA, complete cds	--	--	--	--	GO:0042991//transcription factor import into nucleus;GO:0006396//RNA processing	GO:0000175//3'-5'-exoribonuclease activity;GO:0003723//RNA binding	GO:0005829//cytosol
gi|532783113|gb|GAHT01035154.1|	Protein Synthesis	Unigene28049_All	0.2068	0.0015	0.0072	1	gi|533070832|gb|GAHU01038134.1|	0.1859	0.0022	0.0121	0	gi|102139963|gb|ABF70103.1|	1171	0	glucose-inhibited division A family protein [Musa balbisiana]	PREDICTED: Brachypodium distachyon tRNA uridine 5-carboxymethylaminomethyl modification enzyme MnmG-like (LOC100821591), mRNA	--	gi|357126887|ref|XM_003565071.1|	731	0	PREDICTED: Brachypodium distachyon tRNA uridine 5-carboxymethylaminomethyl modification enzyme MnmG-like (LOC100821591), mRNA	--	--	--	--	GO:0006952//defense response;GO:0042744//hydrogen peroxide catabolic process;GO:0002098//tRNA wobble uridine modification;GO:0055114//oxidation-reduction process	GO:0050660//flavin adenine dinucleotide binding;GO:0016491//oxidoreductase activity;GO:0009055//electron carrier activity	GO:0005737//cytoplasm
gi|532804631|gb|GAHT01014971.1|	Unclassified	Unigene17754_All	0	0	0.0059	1	gi|533076406|gb|GAHU01032560.1|	0.1578	0.0019	0.0119	0	gi|225461332|ref|XP_002284589.1|	250.8	2e-65	PREDICTED: uncharacterized protein LOC100257260 isoform 1 [Vitis vinifera] >gi|359493886|ref|XP_003634686.1| PREDICTED: uncharacterized protein LOC100257260 isoform 2 [Vitis vinifera] >gi|359493888|ref|XP_003634687.1| PREDICTED: uncharacterized protein LOC100257260 isoform 3 [Vitis vinifera]	PREDICTED: Vitis vinifera uncharacterized LOC100257260, transcript variant 3 (LOC100257260), mRNA	--	gi|359493887|ref|XM_003634639.1|	151	1e-33	PREDICTED: Vitis vinifera uncharacterized LOC100257260, transcript variant 3 (LOC100257260), mRNA	--	--	--	--	-	-	GO:0009536//plastid
gi|532782240|gb|GAHT01036027.1|	Unclassified	Unigene13033_All	0.3119	0.0051	0.0162	1	gi|533089468|gb|GAHU01019498.1|	0.156	0.0025	0.0162	0	gi|359491682|ref|XP_003634304.1|	271.6	1e-71	PREDICTED: uncharacterized protein At5g01610-like [Vitis vinifera] >gi|147778229|emb|CAN69724.1| hypothetical protein VITISV_018889 [Vitis vinifera] >gi|297733933|emb|CBI15180.3| unnamed protein product [Vitis vinifera]	PREDICTED: Glycine max uncharacterized protein LOC100819569 (LOC100819569), mRNA	Uncharacterized protein At5g01610 OS=Arabidopsis thaliana GN=At5g01610 PE=1 SV=1	gi|356494876|ref|XM_003516261.1|	73.8	3e-10	PREDICTED: Glycine max uncharacterized protein LOC100819569 (LOC100819569), mRNA	sp|Q9M015|Y5161_ARATH	166	1e-41	Uncharacterized protein At5g01610 OS=Arabidopsis thaliana GN=At5g01610 PE=1 SV=1	-	-	-
gi|532782139|gb|GAHT01036128.1|	Cell growth/division	CL2736.Contig1_All	0.1536	0.003	0.0194	1	gi|533064236|gb|GAHU01044730.1|	0.1532	0.0026	0.0171	0	gi|225442841|ref|XP_002285351.1|	193	1e-48	PREDICTED: monothiol glutaredoxin-S15, mitochondrial isoform 1 [Vitis vinifera] >gi|297743395|emb|CBI36262.3| unnamed protein product [Vitis vinifera]	Glycine max uncharacterized LOC100306093 (LOC100306093), mRNA	Monothiol glutaredoxin-S15, mitochondrial OS=Arabidopsis thaliana GN=GRXS15 PE=1 SV=2	gi|403044461|ref|NM_001250486.2|	105	4e-20	Glycine max uncharacterized LOC100306093 (LOC100306093), mRNA	sp|Q8LBK6|GRS15_ARATH	175	1e-44	Monothiol glutaredoxin-S15, mitochondrial OS=Arabidopsis thaliana GN=GRXS15 PE=1 SV=2	GO:0045454//cell redox homeostasis;GO:0048653//anther development	GO:0046872//metal ion binding;GO:0009055//electron carrier activity;GO:0005515//protein binding;GO:0015035//protein disulfide oxidoreductase activity	GO:0005739//mitochondrion
gi|532797134|gb|GAHT01022468.1|	Unclassified	CL4188.Contig2_All	0	0	0.0069	1	gi|533079199|gb|GAHU01029767.1|	0.1519	0.0022	0.0144	0	gi|255584249|ref|XP_002532862.1|	363.6	2e-99	conserved hypothetical protein [Ricinus communis] >gi|223527374|gb|EEF29516.1| conserved hypothetical protein [Ricinus communis]	PREDICTED: Brachypodium distachyon uncharacterized LOC100825817 (LOC100825817), mRNA	--	gi|357134483|ref|XM_003568799.1|	172	4e-40	PREDICTED: Brachypodium distachyon uncharacterized LOC100825817 (LOC100825817), mRNA	--	--	--	--	GO:0009555//pollen development;GO:0006979//response to oxidative stress	-	GO:0016023//cytoplasmic membrane-bounded vesicle;GO:0005886//plasma membrane
gi|532780299|gb|GAHT01037968.1|	Signal Transdcution	CL8904.Contig1_All	0.1126	0.0019	0.0171	1	gi|533073960|gb|GAHU01035006.1|	0.1505	0.0019	0.0128	0	gi|225436077|ref|XP_002276975.1|	1050.4	0	PREDICTED: serine/threonine-protein kinase TOUSLED [Vitis vinifera] >gi|296084006|emb|CBI24394.3| unnamed protein product [Vitis vinifera]	PREDICTED: Vitis vinifera serine/threonine-protein kinase TOUSLED-like (LOC100265049), mRNA	Serine/threonine-protein kinase TOUSLED OS=Arabidopsis thaliana GN=TOUSLED PE=1 SV=1	gi|359479211|ref|XM_002276939.2|	605	1e-170	PREDICTED: Vitis vinifera serine/threonine-protein kinase TOUSLED-like (LOC100265049), mRNA	sp|Q39238|TSL_ARATH	864	0	Serine/threonine-protein kinase TOUSLED OS=Arabidopsis thaliana GN=TOUSLED PE=1 SV=1	GO:0006468//protein phosphorylation	GO:0005524//ATP binding;GO:0004674//protein serine/threonine kinase activity	GO:0009507//chloroplast;GO:0005634//nucleus
gi|532765206|gb|GAHT01053061.1|	Protein Destination and Storage	CL11820.Contig2_All	0.1435	0.0005	0.0036	1	gi|533055104|gb|GAHU01053248.1|	0.1461	0.0005	0.0034	0	gi|218202315|gb|EEC84742.1|	790	0	hypothetical protein OsI_31738 [Oryza sativa Indica Group]	Hyacinthus orientalis GTP-binding nuclear protein RAN mRNA, partial cds	Pentatricopeptide repeat-containing protein At1g76280 OS=Arabidopsis thaliana GN=At1g76280 PE=2 SV=2	gi|47027099|gb|AY389692.1|	91.7	3e-15	Hyacinthus orientalis GTP-binding nuclear protein RAN mRNA, partial cds	sp|Q9SGQ6|PP126_ARATH	446	3e-125	Pentatricopeptide repeat-containing protein At1g76280 OS=Arabidopsis thaliana GN=At1g76280 PE=2 SV=2	-	-	GO:0005739//mitochondrion;GO:0009507//chloroplast
gi|532757031|gb|GAHT01060341.1|	Signal Transdcution	CL15272.Contig1_All	0.1329	0.0045	0.0337	1	gi|533034187|gb|GAHU01068606.1|	0.1107	0.0022	0.0197	0	gi|225427191|ref|XP_002278877.1|	183	6e-45	PREDICTED: uncharacterized protein LOC100260856 [Vitis vinifera]	PREDICTED: Brachypodium distachyon uncharacterized LOC100831514 (LOC100831514), mRNA	Lysine-rich arabinogalactan protein 18 OS=Arabidopsis thaliana GN=AGP18 PE=2 SV=1	gi|357168315|ref|XM_003581541.1|	63.9	3e-07	PREDICTED: Brachypodium distachyon uncharacterized LOC100831514 (LOC100831514), mRNA	sp|Q9FPR2|AGP18_ARATH	55.8	4e-08	Lysine-rich arabinogalactan protein 18 OS=Arabidopsis thaliana GN=AGP18 PE=2 SV=1	-	-	GO:0044464//cell part
gi|532788562|gb|GAHT01029705.1|	Unclassified	CL11081.Contig2_All	0	0	0.0204	1	gi|533071114|gb|GAHU01037852.1|	0.1102	0.0021	0.0189	0	gi|226494925|ref|NP_001143390.1|	304.7	1e-81	uncharacterized protein LOC100276028 [Zea mays]	PREDICTED: Vitis vinifera uncharacterized LOC100246841 (LOC100246841), mRNA	--	gi|359491436|ref|XM_002278892.2|	210	2e-51	PREDICTED: Vitis vinifera uncharacterized LOC100246841 (LOC100246841), mRNA	--	--	--	--	-	-	GO:0005737//cytoplasm;GO:0016021//integral to membrane
gi|532797973|gb|GAHT01021629.1|	Signal Transdcution	CL7924.Contig2_All	0.275	0.0037	0.0135	1	gi|533077999|gb|GAHU01030967.1|	0.1098	0.0015	0.0135	0	gi|225444599|ref|XP_002274576.1|	879	0	PREDICTED: protein Red isoform 1 [Vitis vinifera] >gi|297738505|emb|CBI27750.3| unnamed protein product [Vitis vinifera]	Zea mays suppressors of mec-8 and unc-52 (C.elegans) (smu2), mRNA	--	gi|162458579|ref|NM_001112518.1|	337	3e-89	Zea mays suppressors of mec-8 and unc-52 (C.elegans) (smu2), mRNA	--	--	--	--	GO:0008380//RNA splicing	-	GO:0005634//nucleus
gi|532797260|gb|GAHT01022342.1|	Signal Transdcution	CL18579.Contig1_All	0.0327	0.0012	0.0362	1	gi|533071336|gb|GAHU01037630.1|	0.1	0.0012	0.0123	0	gi|359489658|ref|XP_003633959.1|	695.3	0	PREDICTED: mitogen-activated protein kinase homolog MMK2-like [Vitis vinifera] >gi|147786894|emb|CAN75543.1| hypothetical protein VITISV_000466 [Vitis vinifera] >gi|297745345|emb|CBI40425.3| unnamed protein product [Vitis vinifera]	Lilium lancifolium mitogen-activated protein kinase 1 (MAPK1) mRNA, partial cds	Mitogen-activated protein kinase 2 OS=Oryza sativa subsp. japonica GN=MPK2 PE=2 SV=1	gi|380713906|gb|JQ437268.1|	488	1e-134	Lilium lancifolium mitogen-activated protein kinase 1 (MAPK1) mRNA, partial cds	sp|Q5J4W4|MPK2_ORYSJ	669	0	Mitogen-activated protein kinase 2 OS=Oryza sativa subsp. japonica GN=MPK2 PE=2 SV=1	GO:0042539//hypotonic salinity response;GO:0006468//protein phosphorylation;GO:0009620//response to fungus;GO:0009409//response to cold;GO:0009861//jasmonic acid and ethylene-dependent systemic resistance;GO:0043622//cortical microtubule organization;GO:0009737//response to abscisic acid stimulus;GO:0006972//hyperosmotic response;GO:0080026//response to indolebutyric acid stimulus;GO:0000165//MAP…	GO:0004707//MAP kinase activity;GO:0005524//ATP binding	GO:0005737//cytoplasm;GO:0005634//nucleus
gi|532786149|gb|GAHT01032118.1|	Transcription	Unigene27836_All	0.1451	0.0019	0.0132	1	gi|533086429|gb|GAHU01022537.1|	0.097	0.001	0.0099	0	gi|147854406|emb|CAN81292.1|	744.6	0	hypothetical protein VITISV_005315 [Vitis vinifera]	PREDICTED: Glycine max general transcription factor IIH subunit 4-like (LOC100777843), mRNA	--	gi|356521346|ref|XM_003529270.1|	240	4e-60	PREDICTED: Glycine max general transcription factor IIH subunit 4-like (LOC100777843), mRNA	--	--	--	--	GO:0000394//RNA splicing, via endonucleolytic cleavage and ligation;GO:0006366//transcription from RNA polymerase II promoter;GO:0006355//regulation of transcription, DNA-dependent;GO:0006281//DNA repair	-	GO:0005634//nucleus
gi|532778850|gb|GAHT01039417.1|	Unclassified	Unigene14576_All	0.3056	0.0041	0.0134	1	gi|533073607|gb|GAHU01035359.1|	0.0764	0.001	0.0133	0	gi|326529359|dbj|BAK01073.1|	590.9	1e-167	predicted protein [Hordeum vulgare subsp. vulgare]	PREDICTED: Brachypodium distachyon COBW domain-containing protein 1-like (LOC100827545), mRNA	--	gi|357165566|ref|XM_003580380.1|	234	2e-58	PREDICTED: Brachypodium distachyon COBW domain-containing protein 1-like (LOC100827545), mRNA	--	--	--	--	-	-	GO:0009508//plastid chromosome;GO:0009570//chloroplast stroma
gi|532771706|gb|GAHT01046561.1|	Transcription	Unigene10515_All	0.0761	0.0013	0.0176	1	gi|533060259|gb|GAHU01048707.1|	0.0753	0.0016	0.0207	0	gi|326522897|dbj|BAJ88494.1|	432.9	3e-120	predicted protein [Hordeum vulgare subsp. vulgare]	PREDICTED: Vitis vinifera tRNA pseudouridine synthase A 1-like (LOC100254503), mRNA	--	gi|225432190|ref|XM_002275061.1|	97.6	2e-17	PREDICTED: Vitis vinifera tRNA pseudouridine synthase A 1-like (LOC100254503), mRNA	--	--	--	--	GO:0006730//one-carbon metabolic process;GO:0031119//tRNA pseudouridine synthesis	GO:0009982//pseudouridine synthase activity;GO:0003723//RNA binding	GO:0009507//chloroplast
gi|532741340|gb|GAHT01076030.1|	Unclassified	Unigene7104_All	0.1921	0.0017	0.0091	1	gi|533021468|gb|GAHU01074516.1|	0.0719	0.0009	0.0121	0	gi|242051879|ref|XP_002455085.1|	681.8	0	hypothetical protein SORBIDRAFT_03g004110 [Sorghum bicolor] >gi|241927060|gb|EES00205.1| hypothetical protein SORBIDRAFT_03g004110 [Sorghum bicolor]	PREDICTED: Brachypodium distachyon uncharacterized LOC100821388 (LOC100821388), mRNA	--	gi|357127490|ref|XM_003565365.1|	117	5e-23	PREDICTED: Brachypodium distachyon uncharacterized LOC100821388 (LOC100821388), mRNA	--	--	--	--	GO:0031047//gene silencing by RNA;GO:0048438//floral whorl development;GO:0016569//covalent chromatin modification;GO:0006259//DNA metabolic process;GO:0048449//floral organ formation;GO:0006342//chromatin silencing;GO:0043414//macromolecule methylation;GO:0007049//cell cycle	-	-
gi|532800678|gb|GAHT01018924.1|	Unclassified	CL13062.Contig1_All	0.7792	0.0043	0.0055	1	gi|533091940|gb|GAHU01017026.1|	0.0618	0.0008	0.0137	0	gi|297733793|emb|CBI15040.3|	763.1	0	unnamed protein product [Vitis vinifera]	PREDICTED: Glycine max protein EXECUTER 1, chloroplastic-like (LOC100783733), mRNA	Protein EXECUTER 1, chloroplastic OS=Arabidopsis thaliana GN=EX1 PE=1 SV=1	gi|356518978|ref|XM_003528104.1|	121	3e-24	PREDICTED: Glycine max protein EXECUTER 1, chloroplastic-like (LOC100783733), mRNA	sp|Q93YW0|EXEC1_ARATH	396	3e-110	Protein EXECUTER 1, chloroplastic OS=Arabidopsis thaliana GN=EX1 PE=1 SV=1	GO:0000304//response to singlet oxygen	-	GO:0042651//thylakoid membrane;GO:0009507//chloroplast
gi|532786356|gb|GAHT01031911.1|	Protein Destination and Storage	CL213.Contig1_All	0.0611	0.0804	1.3163	1	gi|533050480|gb|GAHU01057086.1|	0.0338	0.0012	0.0342	0	gi|225468498|ref|XP_002270407.1|	677.2	0	PREDICTED: ubiquitin carboxyl-terminal hydrolase 3 [Vitis vinifera]	PREDICTED: Vitis vinifera ubiquitin carboxyl-terminal hydrolase 3-like (LOC100253110), mRNA	Ubiquitin carboxyl-terminal hydrolase 3 OS=Arabidopsis thaliana GN=UBP3 PE=1 SV=1	gi|359494735|ref|XM_002270371.2|	480	1e-132	PREDICTED: Vitis vinifera ubiquitin carboxyl-terminal hydrolase 3-like (LOC100253110), mRNA	sp|O24454|UBP3_ARATH	645	0	Ubiquitin carboxyl-terminal hydrolase 3 OS=Arabidopsis thaliana GN=UBP3 PE=1 SV=1	GO:0006007//glucose catabolic process;GO:0006511//ubiquitin-dependent protein catabolic process;GO:0009755//hormone-mediated signaling pathway;GO:0006499//N-terminal protein myristoylation	GO:0004221//ubiquitin thiolesterase activity;GO:0004843//ubiquitin-specific protease activity	GO:0005737//cytoplasm;GO:0005634//nucleus
gi|532816225|gb|GAHT01004699.1|	Cell growth/division	Unigene11188_All	0.962	0.0046	0.0048	1	gi|533088688|gb|GAHU01020278.1|	0	0	0	0	gi|255548654|ref|XP_002515383.1|	484.2	2e-135	protein phosphatase 2c, putative [Ricinus communis] >gi|223545327|gb|EEF46832.1| protein phosphatase 2c, putative [Ricinus communis]	Vitis vinifera clone SS0ABG1YJ05	Probable protein phosphatase 2C 59 OS=Arabidopsis thaliana GN=WIN2 PE=1 SV=1	gi|349703601|emb|FQ383540.1|	474	1e-130	Vitis vinifera clone SS0ABG1YJ05	sp|Q8RXV3|P2C59_ARATH	463	1e-130	Probable protein phosphatase 2C 59 OS=Arabidopsis thaliana GN=WIN2 PE=1 SV=1	GO:0042742//defense response to bacterium;GO:0006470//protein dephosphorylation	GO:0046872//metal ion binding;GO:0004722//protein serine/threonine phosphatase activity	GO:0008287//protein serine/threonine phosphatase complex;GO:0016023//cytoplasmic membrane-bounded vesicle;GO:0005886//plasma membrane;GO:0005739//mitochondrion
gi|532787811|gb|GAHT01030456.1|	Cell Structure	Unigene24393_All	0.6799	0.0091	0.0134	1	gi|533047017|gb|GAHU01060549.1|	0	0	0.0062	0	gi|359359164|gb|AEV41069.1|	244.2	2e-63	putative reticulon [Oryza minuta]	Allium cepa clone AGF173 maintainer line sequence	Reticulon-like protein B11 OS=Arabidopsis thaliana GN=RTNLB11 PE=2 SV=1	gi|15487705|gb|AF366452.1|AF366452	65.9	7e-08	Allium cepa clone AGF173 maintainer line sequence	sp|Q9LT71|RTNLK_ARATH	208	5e-54	Reticulon-like protein B11 OS=Arabidopsis thaliana GN=RTNLB11 PE=2 SV=1	-	-	GO:0005739//mitochondrion;GO:0016020//membrane;GO:0005783//endoplasmic reticulum
gi|532804558|gb|GAHT01015044.1|	Disease/defense	CL18005.Contig2_All	0.639	0.0086	0.0135	1	gi|533105429|gb|GAHU01003537.1|	0	0	0.0132	0	gi|15637350|gb|AAL04507.1|AF406809_1	173.7	1e-42	glutaredoxin [Tilia platyphyllos]	Fritillaria agrestis glutaredoxin type II (glr2) mRNA, complete cds	Glutaredoxin OS=Vernicia fordii PE=3 SV=1	gi|2724047|gb|AF037984.1|AF037984	97.6	1e-17	Fritillaria agrestis glutaredoxin type II (glr2) mRNA, complete cds	sp|O81187|GLRX_VERFO	164	3e-41	Glutaredoxin OS=Vernicia fordii PE=3 SV=1	GO:0045454//cell redox homeostasis;GO:0022900//electron transport chain	GO:0009055//electron carrier activity;GO:0015035//protein disulfide oxidoreductase activity	GO:0005737//cytoplasm
gi|532762322|gb|GAHT01055913.1|	Unclassified	Unigene23096_All	0.4096	0.0116	0.0283	1	gi|533049135|gb|GAHU01058431.1|	0	0	0.0126	0	gi|125525897|gb|EAY74011.1|	196.8	1e-49	hypothetical protein OsI_01897 [Oryza sativa Indica Group] >gi|125525900|gb|EAY74014.1| hypothetical protein OsI_01902 [Oryza sativa Indica Group] >gi|125570363|gb|EAZ11878.1| hypothetical protein OsJ_01753 [Oryza sativa Japonica Group]	Oryza sativa (indica cultivar-group) cDNA clone:OSIGCFA019F09, full insert sequence	--	gi|116632661|emb|CT832465.1|	105	5e-20	Oryza sativa (indica cultivar-group) cDNA clone:OSIGCFA019F09, full insert sequence	--	--	--	--	-	-	GO:0005739//mitochondrion
gi|532756167|gb|GAHT01061203.1|	Transcription	Unigene353_All	0.409	0.0061	0.0148	1	gi|532848641|gb|GAHU01169274.1|	0	0	0.0074	0	gi|255568988|ref|XP_002525464.1|	522.3	6e-147	RNA binding protein, putative [Ricinus communis] >gi|223535277|gb|EEF36954.1| RNA binding protein, putative [Ricinus communis]	PREDICTED: Vitis vinifera RNA-binding protein 40-like (LOC100247346), mRNA	Formin-like protein 14 OS=Oryza sativa subsp. japonica GN=FH14 PE=2 SV=1	gi|359478162|ref|XM_003632030.1|	240	3e-60	PREDICTED: Vitis vinifera RNA-binding protein 40-like (LOC100247346), mRNA	sp|Q0DLG0|FH14_ORYSJ	48.5	9e-06	Formin-like protein 14 OS=Oryza sativa subsp. japonica GN=FH14 PE=2 SV=1	-	GO:0003723//RNA binding	GO:0005634//nucleus;GO:0009536//plastid
gi|532811538|gb|GAHT01009386.1|	Protein Synthesis	CL425.Contig2_All	0.3252	0.0635	0.1952	1	gi|533095930|gb|GAHU01013036.1|	0	0	0.0312	0	gi|353441032|gb|AEQ94100.1|	181.8	1e-44	putative plastid ACP synthase [Elaeis guineensis]	Phyllostachys edulis cDNA clone: bphyst003a07, full insert sequence	Acyl carrier protein 1, chloroplastic OS=Casuarina glauca GN=ACP1 PE=2 SV=1	gi|242385878|emb|FP093729.1|	103	3e-19	Phyllostachys edulis cDNA clone: bphyst003a07, full insert sequence	sp|P93092|ACP1_CASGL	154	5e-38	Acyl carrier protein 1, chloroplastic OS=Casuarina glauca GN=ACP1 PE=2 SV=1	GO:0008610//lipid biosynthetic process	GO:0005488//binding	GO:0005737//cytoplasm
gi|532800128|gb|GAHT01019474.1|	Unclassified	Unigene804_All	0.314	0.0013	0.004	1	gi|533079392|gb|GAHU01029574.1|	0	0	0.0162	0	#N/A	#N/A	#N/A	#N/A	#N/A	#N/A	#N/A	#N/A	#N/A	#N/A	#N/A	#N/A	#N/A	#N/A	#N/A	#N/A	#N/A
gi|532710113|gb|GAHT01106628.1|	Signal Transdcution	Unigene36466_All	0.1835	0.1114	0.6071	1	gi|532857857|gb|GAHU01160058.1|	0	0	0.0201	0	gi|225440502|ref|XP_002272467.1|	329.3	3e-89	PREDICTED: putative receptor protein kinase ZmPK1 [Vitis vinifera]	Prunus persica S-locus-like receptor protein kinase (srkl1) mRNA, partial cds	G-type lectin S-receptor-like serine/threonine-protein kinase At2g19130 OS=Arabidopsis thaliana GN=At2g19130 PE=2 SV=1	gi|50234591|gb|AY645718.1|	105	6e-20	Prunus persica S-locus-like receptor protein kinase (srkl1) mRNA, partial cds	sp|O64477|Y2913_ARATH	205	2e-53	G-type lectin S-receptor-like serine/threonine-protein kinase At2g19130 OS=Arabidopsis thaliana GN=At2g19130 PE=2 SV=1	GO:0048544//recognition of pollen;GO:0006468//protein phosphorylation	GO:0005524//ATP binding;GO:0004674//protein serine/threonine kinase activity	GO:0016023//cytoplasmic membrane-bounded vesicle;GO:0016020//membrane
gi|532774791|gb|GAHT01043476.1|	Unclassified	CL13299.Contig2_All	0.1693	0.002	0.012	1	gi|533095828|gb|GAHU01013138.1|	0	0	0.012	0	gi|115469644|ref|NP_001058421.1|	381.7	8e-105	Os06g0691200 [Oryza sativa Japonica Group] >gi|113596461|dbj|BAF20335.1| Os06g0691200 [Oryza sativa Japonica Group]	Oryza sativa Japonica Group Os06g0691200 (Os06g0691200) mRNA, complete cds	Thaumatin-like protein OS=Arabidopsis thaliana GN=At1g18250 PE=2 SV=2	gi|115469643|ref|NM_001064956.1|	111	1e-21	Oryza sativa Japonica Group Os06g0691200 (Os06g0691200) mRNA, complete cds	sp|P50699|TLPH_ARATH	346	1e-95	Thaumatin-like protein OS=Arabidopsis thaliana GN=At1g18250 PE=2 SV=2	GO:0010075//regulation of meristem growth;GO:0051322//anaphase;GO:0000911//cytokinesis by cell plate formation;GO:0008283//cell proliferation;GO:0000226//microtubule cytoskeleton organization;GO:0051707//response to other organism	-	GO:0009506//plasmodesma;GO:0016023//cytoplasmic membrane-bounded vesicle;GO:0005576//extracellular region;GO:0016020//membrane
gi|532764076|gb|GAHT01054191.1|	Cell growth/division	Unigene31982_All	0.1569	0.0022	0.0139	1	gi|533042924|gb|GAHU01064279.1|	0	0	0.0098	0	gi|297740383|emb|CBI30565.3|	146	4e-34	unnamed protein product [Vitis vinifera]	PREDICTED: Vitis vinifera uncharacterized LOC100247771 (LOC100247771), mRNA	Vegetative cell wall protein gp1 OS=Chlamydomonas reinhardtii GN=GP1 PE=2 SV=1	gi|225440343|ref|XM_002270099.1|	89.7	3e-15	PREDICTED: Vitis vinifera uncharacterized LOC100247771 (LOC100247771), mRNA	sp|Q9FPQ6|GP1_CHLRE	55.8	2e-08	Vegetative cell wall protein gp1 OS=Chlamydomonas reinhardtii GN=GP1 PE=2 SV=1	-	-	-
gi|532789339|gb|GAHT01028928.1|	Transcription Factor	CL19035.Contig3_All	0.1416	0.002	0.0143	1	gi|533062609|gb|GAHU01046357.1|	0	0	0.0211	0	gi|154720967|gb|ABS84659.1|	259.2	8e-68	SOC1-like protein 1 [Citrus sinensis]	Fragaria vesca suppressor of overexpression of CO1 (SOC1) mRNA, complete cds	MADS-box protein SOC1 OS=Arabidopsis thaliana GN=SOC1 PE=1 SV=1	gi|237860118|gb|FJ531999.1|	119	7e-24	Fragaria vesca suppressor of overexpression of CO1 (SOC1) mRNA, complete cds	sp|O64645|SOC1_ARATH	236	2e-62	MADS-box protein SOC1 OS=Arabidopsis thaliana GN=SOC1 PE=1 SV=1	GO:0006355//regulation of transcription, DNA-dependent	GO:0005515//protein binding	-
gi|532797105|gb|GAHT01022497.1|	Unclassified	CL929.Contig1_All	0.1135	0.0063	0.0555	1	gi|533092415|gb|GAHU01016551.1|	0	0	0.0148	0	gi|357476813|ref|XP_003608692.1|	413.7	2e-114	hypothetical protein MTR_4g100740 [Medicago truncatula] >gi|355509747|gb|AES90889.1| hypothetical protein MTR_4g100740 [Medicago truncatula]	PREDICTED: Vitis vinifera uncharacterized LOC100257929 (LOC100257929), mRNA	--	gi|359496491|ref|XM_002269457.2|	101	2e-18	PREDICTED: Vitis vinifera uncharacterized LOC100257929 (LOC100257929), mRNA	--	--	--	--	GO:0071216//cellular response to biotic stimulus;GO:0006984//ER-nucleus signaling pathway;GO:0034976//response to endoplasmic reticulum stress	-	GO:0005783//endoplasmic reticulum;GO:0009507//chloroplast
gi|532764403|gb|GAHT01053864.1|	Unclassified	Unigene31515_All	0.1086	0.0011	0.0097	1	gi|533061556|gb|GAHU01047410.1|	0	0	0.0129	0	gi|115462187|ref|NP_001054693.1|	681.8	0	Os05g0155700 [Oryza sativa Japonica Group] >gi|113578244|dbj|BAF16607.1| Os05g0155700 [Oryza sativa Japonica Group]	Oryza sativa Japonica Group cDNA, clone: J065171A10, full insert sequence	--	gi|116010888|dbj|AK241523.1|	172	7e-40	Oryza sativa Japonica Group cDNA, clone: J065171A10, full insert sequence	--	--	--	--	-	GO:0016740//transferase activity	GO:0016020//membrane;GO:0005739//mitochondrion;GO:0005634//nucleus
gi|532768000|gb|GAHT01050267.1|	Primary Metabolism	CL5872.Contig3_All	0.1037	0.0011	0.011	1	gi|533066725|gb|GAHU01042241.1|	0	0	0.0073	0	gi|212721662|ref|NP_001132820.1|	583.9	1e-165	uncharacterized protein LOC100194310 [Zea mays] >gi|195622262|gb|ACG32961.1| cytidyltransferase-related [Zea mays]	Zea mays uncharacterized LOC100194310 (LOC100194310), mRNA >gi|195622261|gb|EU960843.1| Zea mays clone 229001 cytidyltransferase-related mRNA, complete cds	--	gi|212721661|ref|NM_001139348.1|	143	6e-31	Zea mays uncharacterized LOC100194310 (LOC100194310), mRNA >gi|195622261|gb|EU960843.1| Zea mays clone 229001 cytidyltransferase-related mRNA, complete cds	--	--	--	--	GO:0009058//biosynthetic process	GO:0016779//nucleotidyltransferase activity	GO:0009941//chloroplast envelope
gi|532791261|gb|GAHT01027006.1|	Unclassified	Unigene14129_All	0.1036	0.0012	0.0116	1	gi|533070298|gb|GAHU01038668.1|	0	0	0.0116	0	gi|255575701|ref|XP_002528750.1|	740	0	conserved hypothetical protein [Ricinus communis] >gi|223531844|gb|EEF33662.1| conserved hypothetical protein [Ricinus communis]	PREDICTED: Vitis vinifera uncharacterized LOC100240863 (LOC100240863), mRNA	Uncharacterized protein At5g03900, chloroplastic OS=Arabidopsis thaliana GN=At5g03900 PE=1 SV=2	gi|359482005|ref|XM_002276675.2|	206	6e-50	PREDICTED: Vitis vinifera uncharacterized LOC100240863 (LOC100240863), mRNA	sp|Q8GW20|Y5390_ARATH	635	0	Uncharacterized protein At5g03900, chloroplastic OS=Arabidopsis thaliana GN=At5g03900 PE=1 SV=2	-	-	GO:0009941//chloroplast envelope
gi|532758512|gb|GAHT01058860.1|	Transporter	CL13067.Contig1_All	0.0904	0.005	0.0558	1	gi|533046064|gb|GAHU01061502.1|	0	0	0.0253	0	gi|218192506|gb|EEC74933.1|	445.7	5e-124	hypothetical protein OsI_10895 [Oryza sativa Indica Group] >gi|222624630|gb|EEE58762.1| hypothetical protein OsJ_10268 [Oryza sativa Japonica Group]	Theobroma cacao clone TCC_BA003D04, complete sequence	Thylakoid ADP,ATP carrier protein, chloroplastic OS=Arabidopsis thaliana GN=TAAC PE=1 SV=1	gi|337730156|gb|JN127762.1|	89.7	5e-15	Theobroma cacao clone TCC_BA003D04, complete sequence	sp|Q9M024|TAAC_ARATH	145	5e-35	Thylakoid ADP,ATP carrier protein, chloroplastic OS=Arabidopsis thaliana GN=TAAC PE=1 SV=1	GO:0055085//transmembrane transport;GO:0006839//mitochondrial transport;GO:0009220//pyrimidine ribonucleotide biosynthetic process	GO:0005215//transporter activity	GO:0016021//integral to membrane;GO:0005743//mitochondrial inner membrane;GO:0005886//plasma membrane
gi|532775554|gb|GAHT01042713.1|	Unclassified	Unigene42133_All	0	0	0	1	gi|533091449|gb|GAHU01017517.1|	0	0	0.0108	0	gi|115439611|ref|NP_001044085.1|	126.7	9e-29	Os01g0719600 [Oryza sativa Japonica Group] >gi|113533616|dbj|BAF05999.1| Os01g0719600 [Oryza sativa Japonica Group]	Phyllostachys edulis cDNA clone: bphyst035e24, full insert sequence	--	gi|242375616|emb|FP101537.1|	79.8	1e-12	Phyllostachys edulis cDNA clone: bphyst035e24, full insert sequence	--	--	--	--	GO:0030001//metal ion transport	GO:0046872//metal ion binding	GO:0016023//cytoplasmic membrane-bounded vesicle;GO:0005739//mitochondrion
gi|532812616|gb|GAHT01008308.1|	Unclassified	Unigene12631_All	0	0	0.0164	1	gi|532917856|gb|GAHU01129517.1|	0	0	0.0286	0	gi|225466627|ref|XP_002272048.1|	100.1	2e-20	PREDICTED: probable protein Pop3 [Vitis vinifera] >gi|296083186|emb|CBI22822.3| unnamed protein product [Vitis vinifera]	--	Probable protein Pop3 OS=Arabidopsis thaliana GN=At3g17210 PE=1 SV=1	--	--	--	--	sp|Q9LUV2|POP3_ARATH	89	2e-18	Probable protein Pop3 OS=Arabidopsis thaliana GN=At3g17210 PE=1 SV=1	-	-	-
gi|532769581|gb|GAHT01048686.1|	Protein Destination and Storage	CL9730.Contig1_All	0	0	0.0084	1	gi|533028496|gb|GAHU01071212.1|	0	0	0.0084	0	gi|225454872|ref|XP_002275587.1|	463.4	4e-129	PREDICTED: vacuolar protein sorting-associated protein 72 homolog [Vitis vinifera] >gi|297737375|emb|CBI26576.3| unnamed protein product [Vitis vinifera]	PREDICTED: Vitis vinifera vacuolar protein sorting-associated protein 72 homolog-like (LOC100258083), mRNA	--	gi|359490023|ref|XM_002275551.2|	198	1e-47	PREDICTED: Vitis vinifera vacuolar protein sorting-associated protein 72 homolog-like (LOC100258083), mRNA	--	--	--	--	GO:0042742//defense response to bacterium;GO:0006355//regulation of transcription, DNA-dependent;GO:0009909//regulation of flower development;GO:0008284//positive regulation of cell proliferation;GO:0006338//chromatin remodeling	GO:0003677//DNA binding	GO:0005634//nucleus
gi|532733784|gb|GAHT01083088.1|	Signal Transdcution	CL14756.Contig1_All	0	0	0.009	1	gi|533038059|gb|GAHU01066644.1|	0	0	0	0	gi|224068552|ref|XP_002326143.1|	181	1e-44	SAUR family protein [Populus trichocarpa] >gi|222833336|gb|EEE71813.1| SAUR family protein [Populus trichocarpa]	--	Auxin-induced protein X15 OS=Glycine max PE=2 SV=1	--	--	--	--	sp|P33082|AXX15_SOYBN	74.7	6e-14	Auxin-induced protein X15 OS=Glycine max PE=2 SV=1	GO:0009860//pollen tube growth;GO:0009734//auxin mediated signaling pathway;GO:0009827//plant-type cell wall modification	GO:0005516//calmodulin binding	GO:0005777//peroxisome;GO:0005634//nucleus
gi|532744598|gb|GAHT01072772.1|	Energy	CL8779.Contig1_All	0	0	0.0108	1	gi|533040072|gb|GAHU01065634.1|	0	0	0.0108	0	gi|225463325|ref|XP_002268061.1|	232.6	3e-60	PREDICTED: V-type proton ATPase subunit F [Vitis vinifera] >gi|147766833|emb|CAN63147.1| hypothetical protein VITISV_029487 [Vitis vinifera] >gi|296089563|emb|CBI39382.3| unnamed protein product [Vitis vinifera]	PREDICTED: Vitis vinifera V-type proton ATPase subunit F-like (LOC100267411), mRNA	V-type proton ATPase subunit F OS=Arabidopsis thaliana GN=VHA-F PE=2 SV=1	gi|225463324|ref|XM_002268025.1|	182	3e-43	PREDICTED: Vitis vinifera V-type proton ATPase subunit F-like (LOC100267411), mRNA	sp|Q9ZQX4|VATF_ARATH	214	3e-56	V-type proton ATPase subunit F OS=Arabidopsis thaliana GN=VHA-F PE=2 SV=1	GO:0015991//ATP hydrolysis coupled proton transport	GO:0046933//hydrogen ion transporting ATP synthase activity, rotational mechanism;GO:0046961//proton-transporting ATPase activity, rotational mechanism	GO:0005774//vacuolar membrane;GO:0033180//proton-transporting V-type ATPase, V1 domain;GO:0005794//Golgi apparatus;GO:0005634//nucleus;GO:0005886//plasma membrane
gi|532765976|gb|GAHT01052291.1|	Secondary metabolism	CL311.Contig1_All	0	0	0.0082	1	gi|533040606|gb|GAHU01065392.1|	0	0	0.008	0	gi|255539330|ref|XP_002510730.1|	281.2	8e-75	cinnamoyl-CoA reductase, putative [Ricinus communis] >gi|223551431|gb|EEF52917.1| cinnamoyl-CoA reductase, putative [Ricinus communis]	Ricinus communis cinnamoyl-CoA reductase, putative, mRNA	Cinnamoyl-CoA reductase 1 OS=Arabidopsis thaliana GN=CCR1 PE=1 SV=1	gi|255539329|ref|XM_002510684.1|	67.9	1e-08	Ricinus communis cinnamoyl-CoA reductase, putative, mRNA	sp|Q9S9N9|CCR1_ARATH	164	5e-41	Cinnamoyl-CoA reductase 1 OS=Arabidopsis thaliana GN=CCR1 PE=1 SV=1	GO:0046686//response to cadmium ion;GO:0009809//lignin biosynthetic process	GO:0005488//binding;GO:0016621//cinnamoyl-CoA reductase activity	-
gi|532763380|gb|GAHT01054887.1|	Transcription	Unigene16533_All	0	0	0.0157	1	gi|533061218|gb|GAHU01047748.1|	0	0	0.0157	0	gi|225437229|ref|XP_002281971.1|	270	3e-71	PREDICTED: DNA-directed RNA polymerase III subunit RPC8 [Vitis vinifera] >gi|297735498|emb|CBI17938.3| unnamed protein product [Vitis vinifera]	PREDICTED: Vitis vinifera DNA-directed RNA polymerase III subunit RPC8-like (LOC100261445), mRNA	--	gi|225437228|ref|XM_002281935.1|	65.9	6e-08	PREDICTED: Vitis vinifera DNA-directed RNA polymerase III subunit RPC8-like (LOC100261445), mRNA	--	--	--	--	GO:0009062//fatty acid catabolic process;GO:0006351//transcription, DNA-dependent	GO:0003899//DNA-directed RNA polymerase activity	GO:0009507//chloroplast;GO:0005634//nucleus
gi|532777259|gb|GAHT01041008.1|	Unclassified	Unigene7604_All	0	0	0.0117	1	gi|533063595|gb|GAHU01045371.1|	0	0	0.0164	0	#N/A	#N/A	#N/A	#N/A	#N/A	#N/A	#N/A	#N/A	#N/A	#N/A	#N/A	#N/A	#N/A	#N/A	#N/A	#N/A	#N/A
gi|532773258|gb|GAHT01045009.1|	Transcription Factor	CL4304.Contig1_All	0	0	0.026	1	gi|533069240|gb|GAHU01039726.1|	0	0	0.0165	0	gi|359951774|gb|AEV91177.1|	194.5	1e-48	MYB-related protein [Triticum aestivum]	Oryza sativa Japonica Group Os01g0863300 (Os01g0863300) mRNA, complete cds	Transcription factor DIVARICATA OS=Antirrhinum majus GN=DIVARICATA PE=2 SV=1	gi|115441214|ref|NM_001051422.1|	85.7	6e-14	Oryza sativa Japonica Group Os01g0863300 (Os01g0863300) mRNA, complete cds	sp|Q8S9H7|DIV_ANTMA	162	2e-40	Transcription factor DIVARICATA OS=Antirrhinum majus GN=DIVARICATA PE=2 SV=1	GO:0010286//heat acclimation;GO:0006355//regulation of transcription, DNA-dependent	GO:0003700//sequence-specific DNA binding transcription factor activity;GO:0003677//DNA binding	GO:0005634//nucleus
gi|532787642|gb|GAHT01030625.1|	Protein Destination and Storage	CL9700.Contig2_All	0	0	0	1	gi|533069651|gb|GAHU01039315.1|	0	0	0.0046	0	gi|242064104|ref|XP_002453341.1|	390.2	3e-107	hypothetical protein SORBIDRAFT_04g004150 [Sorghum bicolor] >gi|241933172|gb|EES06317.1| hypothetical protein SORBIDRAFT_04g004150 [Sorghum bicolor]	Zea mays full-length cDNA clone ZM_BFb0325F12 mRNA, complete cds	Protein SCO1 homolog 1, mitochondrial OS=Arabidopsis thaliana GN=HCC1 PE=2 SV=1	gi|223974568|gb|BT065596.1|	240	3e-60	Zea mays full-length cDNA clone ZM_BFb0325F12 mRNA, complete cds	sp|Q8VYP0|SCO11_ARATH	331	6e-91	Protein SCO1 homolog 1, mitochondrial OS=Arabidopsis thaliana GN=HCC1 PE=2 SV=1	GO:0033617//mitochondrial respiratory chain complex IV assembly;GO:0006825//copper ion transport;GO:0019243//methylglyoxal catabolic process to D-lactate;GO:0006626//protein targeting to mitochondrion;GO:0006878//cellular copper ion homeostasis;GO:0009790//embryo development	GO:0005507//copper ion binding	GO:0005743//mitochondrial inner membrane
gi|532750420|gb|GAHT01066950.1|	Signal Transdcution	CL13868.Contig2_All	0	0	0.005	1	gi|533069875|gb|GAHU01039091.1|	0	0	0.0168	0	gi|115463853|ref|NP_001055526.1|	366.3	6e-100	Os05g0409100 [Oryza sativa Japonica Group] >gi|113579077|dbj|BAF17440.1| Os05g0409100 [Oryza sativa Japonica Group]	--	Wall-associated receptor kinase 3 OS=Arabidopsis thaliana GN=WAK3 PE=2 SV=2	--	--	--	--	sp|Q9LMN8|WAK3_ARATH	48.9	8e-06	Wall-associated receptor kinase 3 OS=Arabidopsis thaliana GN=WAK3 PE=2 SV=2	-	-	GO:0016023//cytoplasmic membrane-bounded vesicle
gi|532789413|gb|GAHT01028854.1|	Unclassified	Unigene7386_All	0	0	0.0159	1	gi|533069920|gb|GAHU01039046.1|	0	0	0.019	0	#N/A	#N/A	#N/A	#N/A	#N/A	#N/A	#N/A	#N/A	#N/A	#N/A	#N/A	#N/A	#N/A	#N/A	#N/A	#N/A	#N/A
gi|532803273|gb|GAHT01016329.1|	Unclassified	Unigene30370_All	0	0	0.0172	1	gi|533072427|gb|GAHU01036539.1|	0	0	0.0169	0	gi|125537055|gb|EAY83543.1|	169.5	2e-41	hypothetical protein OsI_38754 [Oryza sativa Indica Group] >gi|125579749|gb|EAZ20895.1| hypothetical protein OsJ_36534 [Oryza sativa Japonica Group]	Zea mays full-length cDNA clone ZM_BFb0060N02 mRNA, complete cds	--	gi|223973874|gb|BT065249.1|	125	5e-26	Zea mays full-length cDNA clone ZM_BFb0060N02 mRNA, complete cds	--	--	--	--	-	-	GO:0005739//mitochondrion;GO:0009536//plastid
gi|532770017|gb|GAHT01048250.1|	Transporter	Unigene16363_All	0	0	0.0186	1	gi|533074830|gb|GAHU01034136.1|	0	0	0.0177	0	gi|225456538|ref|XP_002264965.1|	499.2	5e-140	PREDICTED: ADP,ATP carrier protein ER-ANT1 [Vitis vinifera] >gi|297734094|emb|CBI15341.3| unnamed protein product [Vitis vinifera]	PREDICTED: Vitis vinifera ADP,ATP carrier protein ER-ANT1-like (LOC100263960), mRNA	ADP,ATP carrier protein ER-ANT1 OS=Arabidopsis thaliana GN=ER-ANT1 PE=2 SV=2	gi|225456537|ref|XM_002264929.1|	178	9e-42	PREDICTED: Vitis vinifera ADP,ATP carrier protein ER-ANT1-like (LOC100263960), mRNA	sp|Q8LB08|ADT4_ARATH	486	1e-137	ADP,ATP carrier protein ER-ANT1 OS=Arabidopsis thaliana GN=ER-ANT1 PE=2 SV=2	GO:0022621//shoot system development;GO:0055085//transmembrane transport;GO:0048364//root development;GO:0051503//adenine nucleotide transport;GO:0048316//seed development	GO:0005471//ATP:ADP antiporter activity	GO:0005789//endoplasmic reticulum membrane;GO:0005743//mitochondrial inner membrane;GO:0016021//integral to membrane
gi|532802103|gb|GAHT01017499.1|	Transporter	CL14047.Contig2_All	0	0	0	1	gi|533075263|gb|GAHU01033703.1|	0	0	0.0087	0	gi|359476423|ref|XP_003631836.1|	285.8	4e-76	PREDICTED: transmembrane protein 208-like [Vitis vinifera] >gi|296083809|emb|CBI24026.3| unnamed protein product [Vitis vinifera]	Glycine max uncharacterized LOC100306037 (LOC100306037), mRNA	--	gi|351725508|ref|NM_001249654.1|	87.7	1e-14	Glycine max uncharacterized LOC100306037 (LOC100306037), mRNA	--	--	--	--	GO:0006511//ubiquitin-dependent protein catabolic process;GO:0030244//cellulose biosynthetic process;GO:0051788//response to misfolded protein;GO:0080129//proteasome core complex assembly;GO:0048193//Golgi vesicle transport;GO:0009853//photorespiration	-	GO:0016021//integral to membrane;GO:0005783//endoplasmic reticulum;GO:0005886//plasma membrane
gi|532782711|gb|GAHT01035556.1|	Transcription	Unigene12211_All	0	0	0.0132	1	gi|533080180|gb|GAHU01028786.1|	0	0	0.0199	0	gi|532754|gb|AAA21135.1|	360.9	1e-98	RNase NE [Nicotiana alata]	Prunus dulcis S-like ribonuclease (PD1) mRNA, complete cds	Extracellular ribonuclease LE OS=Solanum lycopersicum PE=1 SV=2	gi|9957751|gb|AF227522.1|AF227522	119	5e-24	Prunus dulcis S-like ribonuclease (PD1) mRNA, complete cds	sp|P80022|RNLE_SOLLC	334	5e-92	Extracellular ribonuclease LE OS=Solanum lycopersicum PE=1 SV=2	GO:0009611//response to wounding;GO:0009718//anthocyanin-containing compound biosynthetic process;GO:0016036//cellular response to phosphate starvation;GO:0007568//aging;GO:0009651//response to salt stress	GO:0003723//RNA binding;GO:0033897//ribonuclease T2 activity	GO:0005886//plasma membrane;GO:0005618//cell wall;GO:0005576//extracellular region
gi|532797374|gb|GAHT01022228.1|	Signal Transdcution	CL5854.Contig2_All	0	0	0	1	gi|533080239|gb|GAHU01028727.1|	0	0	0	0	gi|224131856|ref|XP_002328125.1|	282.3	4e-75	predicted protein [Populus trichocarpa] >gi|222837640|gb|EEE76005.1| predicted protein [Populus trichocarpa]	PREDICTED: Vitis vinifera sorcin-like (LOC100265901), mRNA	Calcium-dependent protein kinase 34 OS=Arabidopsis thaliana GN=CPK34 PE=2 SV=1	gi|225428087|ref|XM_002280288.1|	153	3e-34	PREDICTED: Vitis vinifera sorcin-like (LOC100265901), mRNA	sp|Q3E9C0|CDPKY_ARATH	62.4	3e-10	Calcium-dependent protein kinase 34 OS=Arabidopsis thaliana GN=CPK34 PE=2 SV=1	-	GO:0005509//calcium ion binding	-
gi|532788012|gb|GAHT01030255.1|	Cell Structure	CL12888.Contig2_All	0	0	0.0187	1	gi|533081585|gb|GAHU01027381.1|	0	0	0.015	0	gi|224094739|ref|XP_002310215.1|	200.3	3e-50	predicted protein [Populus trichocarpa] >gi|222853118|gb|EEE90665.1| predicted protein [Populus trichocarpa]	PREDICTED: Vitis vinifera uncharacterized LOC100256475 (LOC100256475), mRNA	Leucine-rich repeat extensin-like protein 5 OS=Arabidopsis thaliana GN=LRX5 PE=2 SV=2	gi|225430797|ref|XM_002271004.1|	111	1e-21	PREDICTED: Vitis vinifera uncharacterized LOC100256475 (LOC100256475), mRNA	sp|Q9SN46|LRX5_ARATH	56.2	2e-08	Leucine-rich repeat extensin-like protein 5 OS=Arabidopsis thaliana GN=LRX5 PE=2 SV=2	GO:0006810//transport	GO:0016491//oxidoreductase activity;GO:0005215//transporter activity	GO:0005794//Golgi apparatus;GO:0016020//membrane
gi|532773245|gb|GAHT01045022.1|	Signal Transdcution	CL19752.Contig1_All	0	0	0.01	1	gi|533082347|gb|GAHU01026619.1|	0	0	0.0196	0	gi|357484303|ref|XP_003612439.1|	130.6	2e-29	Lectin-domain containing receptor kinase A4.2 [Medicago truncatula] >gi|355513774|gb|AES95397.1| Lectin-domain containing receptor kinase A4.2 [Medicago truncatula]	--	--	--	--	--	--	--	--	--	--	-	GO:0005488//binding;GO:0016301//kinase activity	-
gi|532781335|gb|GAHT01036932.1|	Transcription	Unigene32160_All	0	0	0.0181	1	gi|533082365|gb|GAHU01026601.1|	0	0	0.0273	0	gi|224099217|ref|XP_002311407.1|	259.2	3e-68	predicted protein [Populus trichocarpa] >gi|118483385|gb|ABK93593.1| unknown [Populus trichocarpa] >gi|118485555|gb|ABK94629.1| unknown [Populus trichocarpa] >gi|222851227|gb|EEE88774.1| predicted protein [Populus trichocarpa]	Picea glauca clone GQ02011_F01 mRNA sequence	H/ACA ribonucleoprotein complex subunit 2-like protein OS=Arabidopsis thaliana GN=At5g08180 PE=1 SV=1	gi|270135741|gb|BT102693.1|	117	2e-23	Picea glauca clone GQ02011_F01 mRNA sequence	sp|Q9LEY9|NHP2_ARATH	222	2e-58	H/ACA ribonucleoprotein complex subunit 2-like protein OS=Arabidopsis thaliana GN=At5g08180 PE=1 SV=1	-	GO:0003723//RNA binding	GO:0005730//nucleolus;GO:0030529//ribonucleoprotein complex
gi|532792376|gb|GAHT01025891.1|	Unclassified	CL6563.Contig2_All	0	0	0.0143	1	gi|533085527|gb|GAHU01023439.1|	0	0	0.0142	0	gi|225423985|ref|XP_002282642.1|	307	2e-82	PREDICTED: uncharacterized protein LOC100243921 [Vitis vinifera] >gi|297737816|emb|CBI27017.3| unnamed protein product [Vitis vinifera]	Oryza sativa (indica cultivar-group) cDNA clone:OSIGCRA105M13, full insert sequence	--	gi|116632325|emb|CT832129.1|	109	5e-21	Oryza sativa (indica cultivar-group) cDNA clone:OSIGCRA105M13, full insert sequence	--	--	--	--	-	-	GO:0005576//extracellular region;GO:0016023//cytoplasmic membrane-bounded vesicle
gi|532806393|gb|GAHT01013209.1|	Cell growth/division	CL9460.Contig2_All	0	0	0.0074	1	gi|533087681|gb|GAHU01021285.1|	0	0	0	0	gi|297733646|emb|CBI14893.3|	95.1	1e-18	unnamed protein product [Vitis vinifera]	PREDICTED: Glycine max uncharacterized protein LOC100784244 (LOC100784244), mRNA	Eukaryotic initiation factor iso-4F subunit p82-34 OS=Triticum aestivum PE=1 SV=2	gi|356513845|ref|XM_003525571.1|	125	8e-26	PREDICTED: Glycine max uncharacterized protein LOC100784244 (LOC100784244), mRNA	sp|Q03387|IF41_WHEAT	50.4	1e-06	Eukaryotic initiation factor iso-4F subunit p82-34 OS=Triticum aestivum PE=1 SV=2	GO:0009744//response to sucrose stimulus;GO:0006413//translational initiation;GO:0032259//methylation;GO:0009734//auxin mediated signaling pathway;GO:0009750//response to fructose stimulus	GO:0003743//translation initiation factor activity;GO:0008168//methyltransferase activity	GO:0005634//nucleus
gi|532812403|gb|GAHT01008521.1|	Transcription Factor	CL6520.Contig2_All	0	0	0.015	1	gi|533089233|gb|GAHU01019733.1|	0	0	0	0	gi|224098028|ref|XP_002311109.1|	402.1	1e-110	global transcription factor group [Populus trichocarpa] >gi|222850929|gb|EEE88476.1| global transcription factor group [Populus trichocarpa]	PREDICTED: Vitis vinifera transcription factor GTE1-like (LOC100244465), mRNA	Transcription factor GTE1 OS=Arabidopsis thaliana GN=GTE1 PE=2 SV=1	gi|359486528|ref|XM_002276927.2|	103	6e-19	PREDICTED: Vitis vinifera transcription factor GTE1-like (LOC100244465), mRNA	sp|Q84XV2|GTE1_ARATH	318	5e-87	Transcription factor GTE1 OS=Arabidopsis thaliana GN=GTE1 PE=2 SV=1	GO:0009560//embryo sac egg cell differentiation;GO:0000398//mRNA splicing, via spliceosome;GO:0045893//positive regulation of transcription, DNA-dependent;GO:0010030//positive regulation of seed germination	GO:0016740//transferase activity	GO:0005634//nucleus
gi|532811897|gb|GAHT01009027.1|	Disease/defense	CL2461.Contig1_All	0	0	0.0156	1	gi|533092371|gb|GAHU01016595.1|	0	0	0.0122	0	gi|255538692|ref|XP_002510411.1|	491.5	1e-137	Protein yrdA, putative [Ricinus communis] >gi|223551112|gb|EEF52598.1| Protein yrdA, putative [Ricinus communis]	PREDICTED: Vitis vinifera uncharacterized LOC100247109, transcript variant 1 (LOC100247109), mRNA	Gamma carbonic anhydrase 1, mitochondrial OS=Arabidopsis thaliana GN=GAMMACA1 PE=1 SV=1	gi|359492144|ref|XM_002281985.2|	414	1e-113	PREDICTED: Vitis vinifera uncharacterized LOC100247109, transcript variant 1 (LOC100247109), mRNA	sp|Q9FWR5|GCA1_ARATH	457	7e-129	Gamma carbonic anhydrase 1, mitochondrial OS=Arabidopsis thaliana GN=GAMMACA1 PE=1 SV=1	GO:0009853//photorespiration;GO:0019252//starch biosynthetic process	GO:0004089//carbonate dehydratase activity;GO:0016740//transferase activity	GO:0005747//mitochondrial respiratory chain complex I
gi|532814042|gb|GAHT01006882.1|	Signal Transdcution	Unigene42759_All	0	0	0.0178	1	gi|533092517|gb|GAHU01016449.1|	0	0	0.0058	0	gi|242054345|ref|XP_002456318.1|	250.4	2e-65	hypothetical protein SORBIDRAFT_03g033900 [Sorghum bicolor] >gi|241928293|gb|EES01438.1| hypothetical protein SORBIDRAFT_03g033900 [Sorghum bicolor]	PREDICTED: Brachypodium distachyon uncharacterized LOC100841021 (LOC100841021), mRNA	Proline-rich receptor-like protein kinase PERK1 OS=Arabidopsis thaliana GN=PERK1 PE=1 SV=1	gi|357130915|ref|XM_003567042.1|	71.9	1e-09	PREDICTED: Brachypodium distachyon uncharacterized LOC100841021 (LOC100841021), mRNA	sp|Q9LV48|PERK1_ARATH	53.9	1e-07	Proline-rich receptor-like protein kinase PERK1 OS=Arabidopsis thaliana GN=PERK1 PE=1 SV=1	-	-	GO:0005886//plasma membrane
gi|532804823|gb|GAHT01014779.1|	Protein Destination and Storage	Unigene33828_All	0	0	0.0284	1	gi|533094247|gb|GAHU01014719.1|	0	0	0.0284	0	gi|225430768|ref|XP_002267591.1|	271.2	8e-72	PREDICTED: MIP18 family protein At1g68310-like [Vitis vinifera]	Vitis vinifera clone SS0AEB5YF18	MIP18 family protein At1g68310 OS=Arabidopsis thaliana GN=At1g68310 PE=2 SV=2	gi|349720192|emb|FQ397896.1|	210	1e-51	Vitis vinifera clone SS0AEB5YF18	sp|Q9C9G6|U195A_ARATH	191	3e-49	MIP18 family protein At1g68310 OS=Arabidopsis thaliana GN=At1g68310 PE=2 SV=2	-	GO:0010209//vacuolar sorting signal binding	GO:0005634//nucleus
gi|532806896|gb|GAHT01012706.1|	Unclassified	CL11815.Contig2_All	0	0	0.01	1	gi|533096647|gb|GAHU01012319.1|	0	0	0.01	0	gi|115479493|ref|NP_001063340.1|	250.8	3e-65	Os09g0453000 [Oryza sativa Japonica Group] >gi|113631573|dbj|BAF25254.1| Os09g0453000 [Oryza sativa Japonica Group] >gi|313585715|gb|ADR70999.1| salt tolerant protein [Oryza sativa Indica Group]	Oryza sativa (indica cultivar-group) cDNA clone:OSIGCSN032E08, full insert sequence	--	gi|116638934|emb|CT829293.1|	167	4e-38	Oryza sativa (indica cultivar-group) cDNA clone:OSIGCSN032E08, full insert sequence	--	--	--	--	GO:0006661//phosphatidylinositol biosynthetic process	-	GO:0016023//cytoplasmic membrane-bounded vesicle;GO:0016021//integral to membrane
gi|532805277|gb|GAHT01014325.1|	Energy	CL5392.Contig2_All	0	0	0.013	1	gi|533097210|gb|GAHU01011756.1|	0	0	0.0129	0	gi|224118820|ref|XP_002331357.1|	400.2	3e-110	predicted protein [Populus trichocarpa] >gi|222874395|gb|EEF11526.1| predicted protein [Populus trichocarpa]	Phyllostachys edulis cDNA clone: bphyst023n21, full insert sequence	V-type proton ATPase subunit E OS=Citrus limon GN=VATE PE=2 SV=1	gi|242374418|emb|FP095579.1|	321	9e-85	Phyllostachys edulis cDNA clone: bphyst023n21, full insert sequence	sp|Q9SWE7|VATE_CITLI	392	2e-109	V-type proton ATPase subunit E OS=Citrus limon GN=VATE PE=2 SV=1	GO:0009651//response to salt stress;GO:0015991//ATP hydrolysis coupled proton transport;GO:0042742//defense response to bacterium;GO:0007030//Golgi organization;GO:0042777//plasma membrane ATP synthesis coupled proton transport;GO:0009409//response to cold;GO:0009832//plant-type cell wall biogenesis	GO:0046961//proton-transporting ATPase activity, rotational mechanism;GO:0046933//hydrogen ion transporting ATP synthase activity, rotational mechanism;GO:0005524//ATP binding	GO:0009705//plant-type vacuole membrane;GO:0033178//proton-transporting two-sector ATPase complex, catalytic domain;GO:0022626//cytosolic ribosome;GO:0005886//plasma membrane
gi|532814279|gb|GAHT01006645.1|	Signal Transdcution	CL4947.Contig1_All	0	0	0	1	gi|533099626|gb|GAHU01009340.1|	0	0	0.0056	0	gi|192912956|gb|ACF06586.1|	401.4	1e-110	aluminum-induced protein [Elaeis guineensis]	Vitis vinifera clone SS0AFA17YI24	Stem-specific protein TSJT1 OS=Nicotiana tabacum GN=TSJT1 PE=2 SV=1	gi|349706508|emb|FQ395139.1|	186	4e-44	Vitis vinifera clone SS0AFA17YI24	sp|P24805|TSJT1_TOBAC	125	7e-29	Stem-specific protein TSJT1 OS=Nicotiana tabacum GN=TSJT1 PE=2 SV=1	GO:0009737//response to abscisic acid stimulus	-	GO:0005829//cytosol;GO:0005634//nucleus;GO:0005886//plasma membrane
gi|532814264|gb|GAHT01006660.1|	Disease/defense	Unigene16434_All	0	0	0.0045	1	gi|533100523|gb|GAHU01008443.1|	0	0	0.0045	0	gi|225433670|ref|XP_002265927.1|	586.3	3e-166	PREDICTED: auxin-induced protein PCNT115 isoform 1 [Vitis vinifera]	PREDICTED: Vitis vinifera auxin-induced protein PCNT115-like (LOC100258300), mRNA	Probable aldo-keto reductase 2 OS=Oryza sativa subsp. japonica GN=Os04g0338000 PE=2 SV=2	gi|225433675|ref|XM_002266241.1|	293	2e-76	PREDICTED: Vitis vinifera auxin-induced protein PCNT115-like (LOC100258300), mRNA	sp|Q7XT99|AKR2_ORYSJ	571	3e-163	Probable aldo-keto reductase 2 OS=Oryza sativa subsp. japonica GN=Os04g0338000 PE=2 SV=2	GO:0046686//response to cadmium ion;GO:0055114//oxidation-reduction process	GO:0050236//pyridoxine:NADP 4-dehydrogenase activity	GO:0009941//chloroplast envelope;GO:0005886//plasma membrane
gi|532808153|gb|GAHT01011911.1|	Transcription	CL5522.Contig2_All	0	0	0.0164	1	gi|533101319|gb|GAHU01007647.1|	0	0	0	0	gi|357123403|ref|XP_003563400.1|	318.2	1e-85	PREDICTED: regulator of ribonuclease-like protein 2-like [Brachypodium distachyon]	Populus trichocarpa clone POP052-D15, complete sequence	Regulator of ribonuclease-like protein 2 OS=Arabidopsis thaliana GN=At5g16450 PE=2 SV=1	gi|164498907|gb|AC216418.1|	186	3e-44	Populus trichocarpa clone POP052-D15, complete sequence	sp|Q9FFE0|RRAA2_ARATH	289	2e-78	Regulator of ribonuclease-like protein 2 OS=Arabidopsis thaliana GN=At5g16450 PE=2 SV=1	GO:0051252//regulation of RNA metabolic process	GO:0008428//ribonuclease inhibitor activity	-
gi|532819651|gb|GAHT01001273.1|	Primary Metabolism	CL19559.Contig1_All	0	0	0.0157	1	gi|533108297|gb|GAHU01000669.1|	0	0	0.0157	0	gi|224065130|ref|XP_002301683.1|	673.3	0	predicted protein [Populus trichocarpa] >gi|222843409|gb|EEE80956.1| predicted protein [Populus trichocarpa]	M.truncatula mRNA for glutamine synthetase, 1488bp	Glutamine synthetase nodule isozyme OS=Vigna aconitifolia PE=2 SV=1	gi|1835155|emb|Y10268.1|	478	1e-132	M.truncatula mRNA for glutamine synthetase, 1488bp	sp|P32289|GLNA_VIGAC	672	0	Glutamine synthetase nodule isozyme OS=Vigna aconitifolia PE=2 SV=1	GO:0009749//response to glucose stimulus;GO:0009744//response to sucrose stimulus;GO:0009750//response to fructose stimulus;GO:0006542//glutamine biosynthetic process;GO:0042128//nitrate assimilation	GO:0005507//copper ion binding;GO:0005524//ATP binding;GO:0005515//protein binding;GO:0004356//glutamate-ammonia ligase activity	GO:0005618//cell wall;GO:0009506//plasmodesma;GO:0022626//cytosolic ribosome;GO:0005886//plasma membrane
gi|532813827|gb|GAHT01007097.1|	Disease/defense	Unigene30077_All	0.5814	0.0457	0.0786	0	gi|533094866|gb|GAHU01014100.1|	0.6479	0.0379	0.0585	1e-09	gi|297722111|ref|NP_001173419.1|	223.4	9e-58	Os03g0356400 [Oryza sativa Japonica Group] >gi|108708223|gb|ABF96018.1| Glutaredoxin family protein, expressed [Oryza sativa Japonica Group] >gi|255674507|dbj|BAH92147.1| Os03g0356400 [Oryza sativa Japonica Group]	Oryza rufipogon (W1943) cDNA clone: ORW1943C104M07, full insert sequence	Uncharacterized protein At3g28850 OS=Arabidopsis thaliana GN=At3g28850 PE=1 SV=1	gi|157888125|emb|CT841915.1|	67.9	8e-09	Oryza rufipogon (W1943) cDNA clone: ORW1943C104M07, full insert sequence	sp|Q9LH89|Y3885_ARATH	134	3e-32	Uncharacterized protein At3g28850 OS=Arabidopsis thaliana GN=At3g28850 PE=1 SV=1	GO:0045454//cell redox homeostasis	GO:0009055//electron carrier activity;GO:0015035//protein disulfide oxidoreductase activity	-
gi|532814113|gb|GAHT01006811.1|	Transcription	CL16237.Contig1_All	0.4115	0.0812	0.1972	0.0345215	gi|533068468|gb|GAHU01040498.1|	0.5386	0.016	0.0297	1e-09	gi|115446565|ref|NP_001047062.1|	430.6	2e-119	Os02g0540700 [Oryza sativa Japonica Group] >gi|113536593|dbj|BAF08976.1| Os02g0540700 [Oryza sativa Japonica Group]	Oryza sativa Japonica Group Os02g0540700 (Os02g0540700) mRNA, complete cds	U-box domain-containing protein 27 OS=Arabidopsis thaliana GN=PUB27 PE=2 SV=1	gi|115446564|ref|NM_001053597.1|	252	9e-64	Oryza sativa Japonica Group Os02g0540700 (Os02g0540700) mRNA, complete cds	sp|Q9FLF4|PUB27_ARATH	282	4e-76	U-box domain-containing protein 27 OS=Arabidopsis thaliana GN=PUB27 PE=2 SV=1	-	-	-
gi|532790472|gb|GAHT01027795.1|	Signal Transdcution	CL9916.Contig3_All	0.3828	0.0232	0.0605	0.431993	gi|533088801|gb|GAHU01020165.1|	0.7151	0.1581	0.2211	1e-09	gi|147772498|emb|CAN60780.1|	212.6	1e-53	hypothetical protein VITISV_032148 [Vitis vinifera]	--	Ankyrin repeat-containing protein At3g12360 OS=Arabidopsis thaliana GN=At3g12360 PE=2 SV=1	--	--	--	--	sp|Q9C7A2|Y3236_ARATH	110	4e-24	Ankyrin repeat-containing protein At3g12360 OS=Arabidopsis thaliana GN=At3g12360 PE=2 SV=1	-	-	-
gi|532773195|gb|GAHT01045072.1|	Transporter	Unigene27879_All	0.1068	0.0138	0.129	0.536565	gi|533067102|gb|GAHU01041864.1|	0.4102	0.0875	0.2133	1e-09	gi|242090205|ref|XP_002440935.1|	1431.4	0	hypothetical protein SORBIDRAFT_09g017170 [Sorghum bicolor] >gi|241946220|gb|EES19365.1| hypothetical protein SORBIDRAFT_09g017170 [Sorghum bicolor]	PREDICTED: Brachypodium distachyon cation-chloride cotransporter 1-like (LOC100827761), mRNA	Cation-chloride cotransporter 1 OS=Oryza sativa subsp. japonica GN=CCC1 PE=2 SV=1	gi|357128077|ref|XM_003565655.1|	545	1e-152	PREDICTED: Brachypodium distachyon cation-chloride cotransporter 1-like (LOC100827761), mRNA	sp|Q6Z0E2|CCC1_ORYSJ	1430	0	Cation-chloride cotransporter 1 OS=Oryza sativa subsp. japonica GN=CCC1 PE=2 SV=1	GO:0055085//transmembrane transport;GO:0006812//cation transport	GO:0008511//sodium:potassium:chloride symporter activity	GO:0005768//endosome;GO:0005794//Golgi apparatus;GO:0005886//plasma membrane;GO:0016021//integral to membrane;GO:0005802//trans-Golgi network
gi|532779615|gb|GAHT01038652.1|	Signal Transdcution	CL3224.Contig1_All	0.3303	0.0067	0.0202	1	gi|533087263|gb|GAHU01021703.1|	0.3535	0.0192	0.0542	1e-09	gi|224068458|ref|XP_002326125.1|	380.6	1e-104	predicted protein [Populus trichocarpa] >gi|222833318|gb|EEE71795.1| predicted protein [Populus trichocarpa]	Medicago truncatula Kinase-like protein (MTR_2g041960) mRNA, complete cds	Serine/threonine-protein kinase At5g01020 OS=Arabidopsis thaliana GN=At5g01020 PE=1 SV=1	gi|357450004|ref|XM_003595231.1|	99.6	5e-18	Medicago truncatula Kinase-like protein (MTR_2g041960) mRNA, complete cds	sp|Q8GXZ3|Y5102_ARATH	305	2e-83	Serine/threonine-protein kinase At5g01020 OS=Arabidopsis thaliana GN=At5g01020 PE=1 SV=1	GO:0031348//negative regulation of defense response;GO:0016036//cellular response to phosphate starvation;GO:0006499//N-terminal protein myristoylation;GO:0009611//response to wounding;GO:0019375//galactolipid biosynthetic process;GO:0009867//jasmonic acid mediated signaling pathway;GO:0009697//salicylic acid biosynthetic process;GO:0009862//systemic acquired resistance, salicylic acid mediated s…	GO:0004715//non-membrane spanning protein tyrosine kinase activity;GO:0004674//protein serine/threonine kinase activity;GO:0005524//ATP binding	GO:0009536//plastid;GO:0005886//plasma membrane
gi|532720138|gb|GAHT01096603.1|	Transcription Factor	Unigene33810_All	0.6997	0.0703	0.1004	2.23e-07	gi|532945415|gb|GAHU01112622.1|	0.5695	0.0652	0.1145	2e-09	gi|242063140|ref|XP_002452859.1|	226.1	3e-58	hypothetical protein SORBIDRAFT_04g033670 [Sorghum bicolor] >gi|241932690|gb|EES05835.1| hypothetical protein SORBIDRAFT_04g033670 [Sorghum bicolor]	Oryza sativa Japonica Group Os01g0128000 (Os01g0128000) mRNA, complete cds	Transcription factor MYB39 OS=Arabidopsis thaliana GN=MYB39 PE=2 SV=1	gi|115434299|ref|NM_001048443.1|	105	6e-20	Oryza sativa Japonica Group Os01g0128000 (Os01g0128000) mRNA, complete cds	sp|Q8GWP0|MYB39_ARATH	186	8e-48	Transcription factor MYB39 OS=Arabidopsis thaliana GN=MYB39 PE=2 SV=1	GO:0009753//response to jasmonic acid stimulus;GO:0009751//response to salicylic acid stimulus	GO:0003677//DNA binding	-
gi|532809524|gb|GAHT01011044.1|	Unclassified	CL6125.Contig3_All	0.3565	0.0105	0.0294	0.00405856	gi|533035754|gb|GAHU01067835.1|	0.8274	0.1758	0.2124	2e-09	gi|125527065|gb|EAY75179.1|	268.1	2e-70	hypothetical protein OsI_03069 [Oryza sativa Indica Group]	Solanum lycopersicum chromosome 3 clone C03HBa0323D22, complete sequence	--	gi|157649050|gb|EU124742.1|	69.9	7e-09	Solanum lycopersicum chromosome 3 clone C03HBa0323D22, complete sequence	--	--	--	--	GO:0006626//protein targeting to mitochondrion	-	GO:0009506//plasmodesma
gi|532767332|gb|GAHT01050935.1|	Unclassified	CL10991.Contig2_All	1.5213	0.0074	0.0049	0.856395	gi|533025597|gb|GAHU01072573.1|	0.5759	0.02	0.0348	2e-09	gi|297735302|emb|CBI17664.3|	271.2	2e-71	unnamed protein product [Vitis vinifera]	PREDICTED: Glycine max uncharacterized protein LOC100793409 (LOC100793409), mRNA	--	gi|356576647|ref|XM_003556394.1|	81.8	2e-12	PREDICTED: Glycine max uncharacterized protein LOC100793409 (LOC100793409), mRNA	--	--	--	--	-	GO:0003676//nucleic acid binding	-
gi|532780627|gb|GAHT01037640.1|	Protein Destination and Storage	CL190.Contig1_All	0.4837	0.0441	0.0912	3e-09	gi|533036130|gb|GAHU01067628.1|	0.4417	0.0312	0.0707	3e-09	gi|115472151|ref|NP_001059674.1|	335.1	1e-90	Os07g0490400 [Oryza sativa Japonica Group] >gi|113611210|dbj|BAF21588.1| Os07g0490400 [Oryza sativa Japonica Group]	Glycine max uncharacterized LOC100305486 (LOC100305486), mRNA	Peptidyl-prolyl cis-trans isomerase FKBP20-2, chloroplastic OS=Arabidopsis thaliana GN=FKBP20-2 PE=1 SV=1	gi|351726031|ref|NM_001249160.1|	266	4e-68	Glycine max uncharacterized LOC100305486 (LOC100305486), mRNA	sp|Q0WRJ7|FK202_ARATH	308	3e-84	Peptidyl-prolyl cis-trans isomerase FKBP20-2, chloroplastic OS=Arabidopsis thaliana GN=FKBP20-2 PE=1 SV=1	GO:0006457//protein folding;GO:0035304//regulation of protein dephosphorylation;GO:0010207//photosystem II assembly;GO:0009902//chloroplast relocation;GO:0019761//glucosinolate biosynthetic process;GO:0055114//oxidation-reduction process;GO:0045893//positive regulation of transcription, DNA-dependent;GO:0042793//transcription from plastid promoter;GO:0000413//protein peptidyl-prolyl isomerization…	GO:0005528//FK506 binding;GO:0016491//oxidoreductase activity;GO:0003755//peptidyl-prolyl cis-trans isomerase activity	GO:0016020//membrane;GO:0005576//extracellular region;GO:0009543//chloroplast thylakoid lumen
gi|532803830|gb|GAHT01015772.1|	Transporter	CL3915.Contig2_All	0.2342	0.0457	0.1953	0.999991	gi|533097464|gb|GAHU01011502.1|	0.389	0.0916	0.2356	3e-09	gi|363808154|ref|NP_001241748.1|	231.1	4e-60	integral membrane protein like [Zea mays] >gi|195626066|gb|ACG34863.1| integral membrane protein like [Zea mays]	Zea mays LOC100284122 (pco143661), mRNA >gi|195639593|gb|EU967147.1| Zea mays clone 299785 integral membrane protein like mRNA, complete cds	UDP-galactose transporter 2 OS=Arabidopsis thaliana GN=UDP-GALT2 PE=2 SV=1	gi|226507083|ref|NM_001157019.1|	109	3e-21	Zea mays LOC100284122 (pco143661), mRNA >gi|195639593|gb|EU967147.1| Zea mays clone 299785 integral membrane protein like mRNA, complete cds	sp|Q9SRE4|UGAL2_ARATH	195	1e-50	UDP-galactose transporter 2 OS=Arabidopsis thaliana GN=UDP-GALT2 PE=2 SV=1	GO:0009624//response to nematode	-	GO:0016021//integral to membrane
gi|532770051|gb|GAHT01048216.1|	Disease/defense	CL18667.Contig2_All	2.0217	0.149	0.0737	2.283e-06	gi|532976521|gb|GAHU01097154.1|	1.1894	0.1621	0.1363	4e-09	gi|297738634|emb|CBI27879.3|	99.8	4e-20	unnamed protein product [Vitis vinifera]	--	Disease resistance protein RPS2 OS=Arabidopsis thaliana GN=RPS2 PE=1 SV=1	--	--	--	--	sp|Q42484|RPS2_ARATH	86.3	2e-17	Disease resistance protein RPS2 OS=Arabidopsis thaliana GN=RPS2 PE=1 SV=1	-	-	-
gi|532791463|gb|GAHT01026804.1|	Primary Metabolism	CL2205.Contig2_All	0.291	0.0073	0.025	0.999999	gi|533065394|gb|GAHU01043572.1|	0.5435	0.0223	0.0411	4e-09	gi|326531860|dbj|BAK01306.1|	961.4	0	predicted protein [Hordeum vulgare subsp. vulgare]	PREDICTED: Brachypodium distachyon uncharacterized LOC100821058 (LOC100821058), mRNA	Probable UDP-N-acetylglucosamine--peptide N-acetylglucosaminyltransferase SPINDLY OS=Arabidopsis thaliana GN=SPY PE=1 SV=1	gi|357161408|ref|XM_003579032.1|	163	9e-37	PREDICTED: Brachypodium distachyon uncharacterized LOC100821058 (LOC100821058), mRNA	sp|Q96301|SPY_ARATH	51.6	2e-06	Probable UDP-N-acetylglucosamine--peptide N-acetylglucosaminyltransferase SPINDLY OS=Arabidopsis thaliana GN=SPY PE=1 SV=1	GO:0016132//brassinosteroid biosynthetic process	GO:0016740//transferase activity;GO:0005516//calmodulin binding	GO:0005634//nucleus
gi|532812364|gb|GAHT01008560.1|	Transporter	CL5753.Contig1_All	0.2916	0.0275	0.0942	2.4e-08	gi|533095052|gb|GAHU01013914.1|	0.3071	0.026	0.0845	5e-09	gi|326505028|dbj|BAK02901.1|	1539.2	0	predicted protein [Hordeum vulgare subsp. vulgare]	PREDICTED: Vitis vinifera calcium-transporting ATPase 9, plasma membrane-type-like (LOC100253521), mRNA	Calcium-transporting ATPase 8, plasma membrane-type OS=Arabidopsis thaliana GN=ACA8 PE=1 SV=1	gi|359483153|ref|XM_002275038.2|	285	2e-73	PREDICTED: Vitis vinifera calcium-transporting ATPase 9, plasma membrane-type-like (LOC100253521), mRNA	sp|Q9LF79|ACA8_ARATH	1450	0	Calcium-transporting ATPase 8, plasma membrane-type OS=Arabidopsis thaliana GN=ACA8 PE=1 SV=1	GO:0048281//inflorescence morphogenesis;GO:0007338//single fertilization;GO:0009624//response to nematode;GO:0006754//ATP biosynthetic process;GO:0009555//pollen development;GO:0048367//shoot development;GO:0070588//calcium ion transmembrane transport	GO:0043621//protein self-association;GO:0046872//metal ion binding;GO:0005388//calcium-transporting ATPase activity;GO:0005516//calmodulin binding;GO:0005524//ATP binding	GO:0016021//integral to membrane;GO:0005886//plasma membrane
gi|532755662|gb|GAHT01061708.1|	Disease/defense	CL19670.Contig1_All	0.6958	0.0776	0.1115	0	gi|532936927|gb|GAHU01117549.1|	0.6342	0.1337	0.2108	6e-09	gi|115466532|ref|NP_001056865.1|	529.6	1e-148	Os06g0158300 [Oryza sativa Japonica Group] >gi|113594905|dbj|BAF18779.1| Os06g0158300 [Oryza sativa Japonica Group]	--	Disease resistance protein RPM1 OS=Arabidopsis thaliana GN=RPM1 PE=1 SV=1	--	--	--	--	sp|Q39214|RPM1_ARATH	354	1e-97	Disease resistance protein RPM1 OS=Arabidopsis thaliana GN=RPM1 PE=1 SV=1	-	-	-
gi|532795593|gb|GAHT01023253.1|	Energy	CL177.Contig5_All	0.1147	0.0022	0.019	0.999999	gi|533100457|gb|GAHU01008509.1|	0.4502	0.0108	0.024	7e-09	gi|357112483|ref|XP_003558038.1|	804.3	0	PREDICTED: glucose-6-phosphate 1-dehydrogenase 4, chloroplastic-like isoform 1 [Brachypodium distachyon]	PREDICTED: Vitis vinifera glucose-6-phosphate 1-dehydrogenase 4, chloroplastic-like (LOC100254628), mRNA	Glucose-6-phosphate 1-dehydrogenase 4, chloroplastic OS=Arabidopsis thaliana GN=At1g09420 PE=2 SV=1	gi|359487570|ref|XM_002276951.2|	222	1e-54	PREDICTED: Vitis vinifera glucose-6-phosphate 1-dehydrogenase 4, chloroplastic-like (LOC100254628), mRNA	sp|Q93ZW0|G6PD4_ARATH	734	0	Glucose-6-phosphate 1-dehydrogenase 4, chloroplastic OS=Arabidopsis thaliana GN=At1g09420 PE=2 SV=1	GO:0006006//glucose metabolic process;GO:0055114//oxidation-reduction process	GO:0050661//NADP binding;GO:0004345//glucose-6-phosphate dehydrogenase activity	GO:0009507//chloroplast
gi|532802632|gb|GAHT01016970.1|	Primary Metabolism	Unigene35499_All	0.403	0.0064	0.0159	1	gi|533093505|gb|GAHU01015461.1|	0.3753	0.0141	0.0374	9e-09	gi|225429143|ref|XP_002274729.1|	199.5	1e-49	PREDICTED: uncharacterized protein LOC100259947 isoform 1 [Vitis vinifera] >gi|359475528|ref|XP_003631696.1| PREDICTED: uncharacterized protein LOC100259947 isoform 2 [Vitis vinifera]	Solanum lycopersicum strain Heinz 1706 chromosome 1 clone hba-33m2 map 1, complete sequence	Protein ycf2 (Fragment) OS=Oenothera picensis GN=ycf2 PE=3 SV=1	gi|290755772|gb|AC240204.1|	63.9	4e-07	Solanum lycopersicum strain Heinz 1706 chromosome 1 clone hba-33m2 map 1, complete sequence	sp|P31568|YCF2_OENPI	82.8	4e-16	Protein ycf2 (Fragment) OS=Oenothera picensis GN=ycf2 PE=3 SV=1	-	-	GO:0043231//intracellular membrane-bounded organelle;GO:0044444//cytoplasmic part
gi|532806154|gb|GAHT01013448.1|	Cell growth/division	Unigene53132_All	0.1652	0.0131	0.0796	0.990379	gi|532832352|gb|GAHU01185563.1|	0.5774	0.1308	0.2266	1.4e-08	gi|224118020|ref|XP_002317713.1|	171	2e-41	predicted protein [Populus trichocarpa] >gi|222858386|gb|EEE95933.1| predicted protein [Populus trichocarpa]	Populus trichocarpa predicted protein, mRNA	Vegetative cell wall protein gp1 OS=Chlamydomonas reinhardtii GN=GP1 PE=2 SV=1	gi|224125739|ref|XM_002329670.1|	61.9	1e-06	Populus trichocarpa predicted protein, mRNA	sp|Q9FPQ6|GP1_CHLRE	67.8	9e-12	Vegetative cell wall protein gp1 OS=Chlamydomonas reinhardtii GN=GP1 PE=2 SV=1	GO:0009737//response to abscisic acid stimulus;GO:0009414//response to water deprivation;GO:0009409//response to cold;GO:0042538//hyperosmotic salinity response	-	-
gi|532738342|gb|GAHT01079024.1|	Signal Transdcution	Unigene24084_All	0.6773	0.1738	0.2566	7.162e-06	gi|532871835|gb|GAHU01150756.1|	1.01	0.0848	0.084	2.1e-08	gi|356577829|ref|XP_003557024.1|	101.3	5e-21	PREDICTED: probable LRR receptor-like serine/threonine-protein kinase At4g08850-like [Glycine max]	--	Probable leucine-rich repeat receptor-like protein kinase At1g35710 OS=Arabidopsis thaliana GN=At1g35710 PE=2 SV=1	--	--	--	--	sp|Q9LP24|Y1571_ARATH	76.6	6e-15	Probable leucine-rich repeat receptor-like protein kinase At1g35710 OS=Arabidopsis thaliana GN=At1g35710 PE=2 SV=1	-	GO:0016772//transferase activity, transferring phosphorus-containing groups	-
gi|532749553|gb|GAHT01067817.1|	Unclassified	CL9395.Contig1_All	0.2223	0.0731	0.3288	3.44e-07	gi|533085943|gb|GAHU01023023.1|	0.214	0.0688	0.3216	2.6e-08	gi|359476651|ref|XP_002273723.2|	428.3	7e-119	PREDICTED: uncharacterized protein LOC100264247 [Vitis vinifera] >gi|297735064|emb|CBI17426.3| unnamed protein product [Vitis vinifera]	PREDICTED: Vitis vinifera uncharacterized LOC100264247 (LOC100264247), mRNA	--	gi|359476650|ref|XM_002273687.2|	291	6e-76	PREDICTED: Vitis vinifera uncharacterized LOC100264247 (LOC100264247), mRNA	--	--	--	--	GO:0055114//oxidation-reduction process;GO:0007160//cell-matrix adhesion;GO:0006486//protein glycosylation;GO:0006081//cellular aldehyde metabolic process	GO:0004030//aldehyde dehydrogenase [NAD(P)+] activity;GO:0004029//aldehyde dehydrogenase (NAD) activity	GO:0008305//integrin complex;GO:0005739//mitochondrion;GO:0005774//vacuolar membrane;GO:0016023//cytoplasmic membrane-bounded vesicle;GO:0005783//endoplasmic reticulum;GO:0005794//Golgi apparatus
gi|532805944|gb|GAHT01013658.1|	Primary Metabolism	CL7517.Contig1_All	0.3091	0.0049	0.0157	0.999999	gi|533095125|gb|GAHU01013841.1|	0.5221	0.0184	0.0353	2.6e-08	gi|359484534|ref|XP_002283565.2|	697.6	0	PREDICTED: probable glutamate carboxypeptidase 2-like isoform 1 [Vitis vinifera]	PREDICTED: Vitis vinifera probable glutamate carboxypeptidase 2-like, transcript variant 1 (LOC100247495), mRNA	Probable glutamate carboxypeptidase 2 OS=Arabidopsis thaliana GN=AMP1 PE=1 SV=3	gi|359484533|ref|XM_002283529.2|	159	1e-35	PREDICTED: Vitis vinifera probable glutamate carboxypeptidase 2-like, transcript variant 1 (LOC100247495), mRNA	sp|Q9M1S8|GCP2_ARATH	412	3e-115	Probable glutamate carboxypeptidase 2 OS=Arabidopsis thaliana GN=AMP1 PE=1 SV=3	GO:0006508//proteolysis	GO:0016491//oxidoreductase activity;GO:0016805//dipeptidase activity;GO:0004180//carboxypeptidase activity	GO:0005773//vacuole;GO:0005886//plasma membrane
gi|532800351|gb|GAHT01019251.1|	Cell Structure	CL1028.Contig3_All	0.1015	0.0801	0.789	0.869834	gi|533076035|gb|GAHU01032931.1|	0.5266	0.01	0.0191	2.7e-08	gi|225424380|ref|XP_002284904.1|	920.6	0	PREDICTED: microtubule-associated protein 70-2 [Vitis vinifera] >gi|297737627|emb|CBI26828.3| unnamed protein product [Vitis vinifera]	PREDICTED: Brachypodium distachyon microtubule-associated protein 70-3-like (LOC100844249), mRNA	Microtubule-associated protein 70-2 OS=Oryza sativa subsp. japonica GN=MAP70.2 PE=2 SV=1	gi|357124626|ref|XM_003563951.1|	513	1e-142	PREDICTED: Brachypodium distachyon microtubule-associated protein 70-3-like (LOC100844249), mRNA	sp|Q6Z746|MP702_ORYSJ	894	0	Microtubule-associated protein 70-2 OS=Oryza sativa subsp. japonica GN=MAP70.2 PE=2 SV=1	GO:0010051//xylem and phloem pattern formation;GO:0007010//cytoskeleton organization;GO:0009832//plant-type cell wall biogenesis	GO:0008017//microtubule binding	GO:0010005//cortical microtubule, transverse to long axis;GO:0005886//plasma membrane;GO:0005634//nucleus
gi|532794288|gb|GAHT01023979.1|	Cell growth/division	Unigene4465_All	1.3514	0.0324	0.024	0	gi|533074295|gb|GAHU01034671.1|	1.0073	0.031	0.0308	4.2e-08	gi|224064862|ref|XP_002301588.1|	108.2	3e-22	f-box family protein [Populus trichocarpa] >gi|222843314|gb|EEE80861.1| f-box family protein [Populus trichocarpa]	--	F-box protein At3g07870 OS=Arabidopsis thaliana GN=At3g07870 PE=2 SV=1	--	--	--	--	sp|Q9SFC7|FB135_ARATH	91.7	1e-18	F-box protein At3g07870 OS=Arabidopsis thaliana GN=At3g07870 PE=2 SV=1	-	-	-
gi|532799699|gb|GAHT01019903.1|	Unclassified	Unigene31579_All	0.2753	0.0149	0.0539	0.0105966	gi|533062494|gb|GAHU01046472.1|	0.7414	0.0249	0.0336	7e-08	gi|218185369|gb|EEC67796.1|	432.2	7e-120	hypothetical protein OsI_35356 [Oryza sativa Indica Group]	Oryza sativa (indica cultivar-group) cDNA clone:OSIGCSA002B17, full insert sequence	Short-chain dehydrogenase TIC 32, chloroplastic OS=Arabidopsis thaliana GN=TIC32 PE=2 SV=1	gi|116640223|emb|CT829986.1|	67.9	2e-08	Oryza sativa (indica cultivar-group) cDNA clone:OSIGCSA002B17, full insert sequence	sp|A2RVM0|TIC32_ARATH	319	2e-87	Short-chain dehydrogenase TIC 32, chloroplastic OS=Arabidopsis thaliana GN=TIC32 PE=2 SV=1	GO:0055114//oxidation-reduction process	GO:0016491//oxidoreductase activity;GO:0000166//nucleotide binding	-
gi|532782560|gb|GAHT01035707.1|	Signal Transdcution	Unigene20986_All	0.4614	0.0144	0.0312	9.9e-07	gi|533063026|gb|GAHU01045940.1|	0.5693	0.0131	0.023	8.6e-08	gi|222624617|gb|EEE58749.1|	496.9	3e-139	hypothetical protein OsJ_10239 [Oryza sativa Japonica Group]	PREDICTED: Brachypodium distachyon probable leucine-rich repeat receptor-like serine/threonine-protein kinase At3g14840-like (LOC100821854), mRNA	Probable leucine-rich repeat receptor-like serine/threonine-protein kinase At3g14840 OS=Arabidopsis thaliana GN=LRR-RLK PE=1 SV=1	gi|357112996|ref|XM_003558243.1|	167	4e-38	PREDICTED: Brachypodium distachyon probable leucine-rich repeat receptor-like serine/threonine-protein kinase At3g14840-like (LOC100821854), mRNA	sp|C0LGN2|Y3148_ARATH	333	2e-91	Probable leucine-rich repeat receptor-like serine/threonine-protein kinase At3g14840 OS=Arabidopsis thaliana GN=LRR-RLK PE=1 SV=1	GO:0009595//detection of biotic stimulus;GO:0002237//response to molecule of bacterial origin;GO:0010200//response to chitin;GO:0016310//phosphorylation;GO:0009581//detection of external stimulus	GO:0004672//protein kinase activity;GO:0000166//nucleotide binding	-
gi|532783839|gb|GAHT01034428.1|	Transcription Factor	CL15362.Contig1_All	0.4436	0.0329	0.0741	0	gi|533056223|gb|GAHU01052497.1|	0.5601	0.0286	0.051	8.7e-08	gi|255584594|ref|XP_002533021.1|	432.9	7e-120	Transcription factor RF2a, putative [Ricinus communis] >gi|223527183|gb|EEF29352.1| Transcription factor RF2a, putative [Ricinus communis]	PREDICTED: Vitis vinifera uncharacterized LOC100257570 (LOC100257570), mRNA	Uncharacterized protein At4g06598 OS=Arabidopsis thaliana GN=At4g06598 PE=2 SV=2	gi|225448175|ref|XM_002266025.1|	149	1e-32	PREDICTED: Vitis vinifera uncharacterized LOC100257570 (LOC100257570), mRNA	sp|Q8W3M7|Y4598_ARATH	191	1e-48	Uncharacterized protein At4g06598 OS=Arabidopsis thaliana GN=At4g06598 PE=2 SV=2	GO:0050896//response to stimulus;GO:0071704;GO:0044238//primary metabolic process;GO:0034645//cellular macromolecule biosynthetic process;GO:0050794//regulation of cellular process;GO:0010467//gene expression	GO:0003677//DNA binding	GO:0005739//mitochondrion
gi|532798296|gb|GAHT01021306.1|	Secondary metabolism	CL9562.Contig3_All	0.358	0.0083	0.0232	0.999999	gi|533061846|gb|GAHU01047120.1|	0.4558	0.0156	0.0343	9.9e-08	gi|218191606|gb|EEC74033.1|	523.5	4e-147	hypothetical protein OsI_08990 [Oryza sativa Indica Group]	PREDICTED: Vitis vinifera UDP-glycosyltransferase 85A3-like (LOC100248812), mRNA	UDP-glycosyltransferase 85A1 OS=Arabidopsis thaliana GN=UGT85A1 PE=1 SV=1	gi|359492876|ref|XM_002285731.2|	67.9	4e-08	PREDICTED: Vitis vinifera UDP-glycosyltransferase 85A3-like (LOC100248812), mRNA	sp|Q9SK82|U85A1_ARATH	464	8e-131	UDP-glycosyltransferase 85A1 OS=Arabidopsis thaliana GN=UGT85A1 PE=1 SV=1	-	GO:0035251//UDP-glucosyltransferase activity	-
gi|532756230|gb|GAHT01061140.1|	Signal Transdcution	CL2428.Contig2_All	0.1759	0.0368	0.209	1	gi|533093692|gb|GAHU01015274.1|	0.269	0.0722	0.2685	1.11e-07	gi|297746278|emb|CBI16334.3|	737.3	0	unnamed protein product [Vitis vinifera]	Glycine max protein kinase family protein (LOC100305419), mRNA >gi|223452423|gb|FJ014786.1| Glycine max clone cw103 protein kinase family protein mRNA, complete cds	Receptor-like serine/threonine-protein kinase NCRK OS=Arabidopsis thaliana GN=NCRK PE=1 SV=1	gi|351727636|ref|NM_001248191.1|	107	5e-20	Glycine max protein kinase family protein (LOC100305419), mRNA >gi|223452423|gb|FJ014786.1| Glycine max clone cw103 protein kinase family protein mRNA, complete cds	sp|Q8VYY5|NCRK_ARATH	556	3e-158	Receptor-like serine/threonine-protein kinase NCRK OS=Arabidopsis thaliana GN=NCRK PE=1 SV=1	GO:0007155//cell adhesion;GO:0045010//actin nucleation;GO:0016310//phosphorylation;GO:0010090//trichome morphogenesis;GO:0048765//root hair cell differentiation;GO:0010014//meristem initiation;GO:0010382//cellular cell wall macromolecule metabolic process;GO:0071555//cell wall organization;GO:0010089//xylem development	GO:0000166//nucleotide binding;GO:0051020//GTPase binding;GO:0004672//protein kinase activity	GO:0012505//endomembrane system;GO:0005886//plasma membrane;GO:0010008//endosome membrane
gi|532786847|gb|GAHT01031420.1|	Protein Destination and Storage	CL7857.Contig1_All	0.2869	0.0791	0.2756	2.66e-07	gi|533106494|gb|GAHU01002472.1|	0.2954	0.0796	0.2696	1.27e-07	gi|242044478|ref|XP_002460110.1|	449.5	5e-125	hypothetical protein SORBIDRAFT_02g022910 [Sorghum bicolor] >gi|241923487|gb|EER96631.1| hypothetical protein SORBIDRAFT_02g022910 [Sorghum bicolor]	Phyllostachys edulis cDNA clone: bphyst002b10, full insert sequence	Mitochondrial outer membrane protein porin 1 OS=Oryza sativa subsp. japonica GN=VDAC1 PE=1 SV=3	gi|242382475|emb|FP091717.1|	426	1e-116	Phyllostachys edulis cDNA clone: bphyst002b10, full insert sequence	sp|Q6K548|VDAC1_ORYSJ	443	1e-124	Mitochondrial outer membrane protein porin 1 OS=Oryza sativa subsp. japonica GN=VDAC1 PE=1 SV=3	GO:0055085//transmembrane transport;GO:0044070//regulation of anion transport;GO:0042742//defense response to bacterium	GO:0008308//voltage-gated anion channel activity	GO:0005618//cell wall;GO:0005730//nucleolus;GO:0009941//chloroplast envelope;GO:0005741//mitochondrial outer membrane;GO:0005773//vacuole;GO:0005886//plasma membrane
gi|532799930|gb|GAHT01019672.1|	Transcription Factor	CL958.Contig2_All	0.2794	0.045	0.1612	0.996246	gi|533072159|gb|GAHU01036807.1|	0.828	0.0181	0.0219	2.33e-07	gi|218191352|gb|EEC73779.1|	194.5	1e-48	hypothetical protein OsI_08459 [Oryza sativa Indica Group]	Oryza sativa Japonica Group Os02g0677700 (Os02g0677700) mRNA, partial cds	Zinc finger CCCH domain-containing protein 17 OS=Oryza sativa subsp. japonica GN=Os02g0677700 PE=2 SV=2	gi|297721500|ref|NM_001186184.1|	87.7	2e-14	Oryza sativa Japonica Group Os02g0677700 (Os02g0677700) mRNA, partial cds	sp|Q0DYP5|C3H17_ORYSJ	194	6e-50	Zinc finger CCCH domain-containing protein 17 OS=Oryza sativa subsp. japonica GN=Os02g0677700 PE=2 SV=2	-	-	-
gi|532746231|gb|GAHT01071139.1|	Transcription	CL8666.Contig2_All	0.3233	0.0749	0.2316	7.284e-06	gi|533040718|gb|GAHU01065333.1|	0.4036	0.0255	0.0631	2.34e-07	gi|222640528|gb|EEE68660.1|	466.5	2e-130	hypothetical protein OsJ_27256 [Oryza sativa Japonica Group]	Oryza sativa Japonica Group cDNA, clone: J100055K16, full insert sequence	Probable tRNA modification GTPase mnmE OS=Cyanidium caldarium GN=mnmE PE=3 SV=1	gi|211970964|dbj|AK318593.1|	170	2e-39	Oryza sativa Japonica Group cDNA, clone: J100055K16, full insert sequence	sp|Q9TLX6|MNME_CYACA	135	4e-32	Probable tRNA modification GTPase mnmE OS=Cyanidium caldarium GN=mnmE PE=3 SV=1	GO:0007264//small GTPase mediated signal transduction;GO:0006184//GTP catabolic process;GO:0006897//endocytosis;GO:0006400//tRNA modification	GO:0003924//GTPase activity;GO:0005525//GTP binding	GO:0005737//cytoplasm
gi|532764757|gb|GAHT01053510.1|	Signal Transdcution	CL18936.Contig3_All	0.4643	0.0082	0.0177	1.1e-08	gi|533047554|gb|GAHU01060012.1|	0.4082	0.0082	0.0201	2.35e-07	gi|225450923|ref|XP_002280699.1|	733.8	0	PREDICTED: uncharacterized protein LOC100259697 [Vitis vinifera] >gi|296088351|emb|CBI36796.3| unnamed protein product [Vitis vinifera]	PREDICTED: Brachypodium distachyon uncharacterized LOC100842839 (LOC100842839), mRNA	Proline-rich receptor-like protein kinase PERK8 OS=Arabidopsis thaliana GN=PERK8 PE=1 SV=1	gi|357128021|ref|XM_003565627.1|	174	2e-40	PREDICTED: Brachypodium distachyon uncharacterized LOC100842839 (LOC100842839), mRNA	sp|Q9FFW5|PERK8_ARATH	56.6	5e-08	Proline-rich receptor-like protein kinase PERK8 OS=Arabidopsis thaliana GN=PERK8 PE=1 SV=1	GO:0007059//chromosome segregation;GO:0007131//reciprocal meiotic recombination;GO:0042138//meiotic DNA double-strand break formation;GO:0007129//synapsis	GO:0016740//transferase activity	GO:0005768//endosome;GO:0005794//Golgi apparatus;GO:0005802//trans-Golgi network
gi|532740819|gb|GAHT01076551.1|	Unclassified	CL2416.Contig1_All	0.4713	0.0085	0.018	1	gi|532962436|gb|GAHU01104254.1|	0.7586	0.0395	0.052	3.01e-07	gi|225437511|ref|XP_002275125.1|	183.3	1e-45	PREDICTED: uncharacterized protein LOC100257226 [Vitis vinifera] >gi|297743955|emb|CBI36925.3| unnamed protein product [Vitis vinifera]	PREDICTED: Vitis vinifera uncharacterized LOC100257226 (LOC100257226), mRNA	--	gi|359480131|ref|XM_002275089.2|	67.9	9e-09	PREDICTED: Vitis vinifera uncharacterized LOC100257226 (LOC100257226), mRNA	--	--	--	--	-	-	-
gi|532768557|gb|GAHT01049710.1|	Unclassified	CL9027.Contig2_All	0.1684	0.0206	0.1221	0.0493026	gi|533047159|gb|GAHU01060407.1|	0.3957	0.0098	0.0246	3.15e-07	gi|225467482|ref|XP_002265460.1|	503.1	6e-141	PREDICTED: protein IQ-DOMAIN 14-like [Vitis vinifera]	PREDICTED: Vitis vinifera protein IQ-DOMAIN 14-like (LOC100244856), mRNA	Protein IQ-DOMAIN 14 OS=Arabidopsis thaliana GN=IQD14 PE=1 SV=1	gi|359477556|ref|XM_002265424.2|	79.8	9e-12	PREDICTED: Vitis vinifera protein IQ-DOMAIN 14-like (LOC100244856), mRNA	sp|Q8LPG9|IQD14_ARATH	86.3	6e-17	Protein IQ-DOMAIN 14 OS=Arabidopsis thaliana GN=IQD14 PE=1 SV=1	-	-	-
gi|532783875|gb|GAHT01034392.1|	Energy	Unigene28326_All	0.2197	0.0081	0.0367	0.999998	gi|533069853|gb|GAHU01039113.1|	0.4198	0.0307	0.0731	4.38e-07	gi|225452226|ref|XP_002268368.1|	429.5	3e-119	PREDICTED: ATP synthase mitochondrial F1 complex assembly factor 2 [Vitis vinifera] >gi|296081322|emb|CBI17704.3| unnamed protein product [Vitis vinifera]	PREDICTED: Vitis vinifera ATP synthase mitochondrial F1 complex assembly factor 2-like (LOC100268057), mRNA	Formin-like protein 3 OS=Oryza sativa subsp. japonica GN=FH3 PE=2 SV=2	gi|359488647|ref|XM_002268332.2|	238	9e-60	PREDICTED: Vitis vinifera ATP synthase mitochondrial F1 complex assembly factor 2-like (LOC100268057), mRNA	sp|Q7G6K7|FH3_ORYSJ	57.4	3e-14	Formin-like protein 3 OS=Oryza sativa subsp. japonica GN=FH3 PE=2 SV=2	GO:0043461//proton-transporting ATP synthase complex assembly	-	GO:0005739//mitochondrion
gi|532783642|gb|GAHT01034625.1|	Unclassified	Unigene18046_All	0.2139	0.0086	0.04	0.999998	gi|533047028|gb|GAHU01060538.1|	0.4873	0.0076	0.0156	4.93e-07	gi|302143404|emb|CBI21965.3|	333.6	1e-90	unnamed protein product [Vitis vinifera]	Phyllostachys edulis cDNA clone: bphyem105a03, full insert sequence	--	gi|242384634|emb|FP098233.1|	95.6	5e-17	Phyllostachys edulis cDNA clone: bphyem105a03, full insert sequence	--	--	--	--	GO:0032259//methylation	GO:0008168//methyltransferase activity	-
gi|532793912|gb|GAHT01024355.1|	Transcription	CL8596.Contig6_All	0.2	0.0385	0.1927	0.000248852	gi|533097449|gb|GAHU01011517.1|	0.1905	0.0247	0.1299	5.14e-07	gi|224122232|ref|XP_002330572.1|	737.6	0	predicted protein [Populus trichocarpa] >gi|222872130|gb|EEF09261.1| predicted protein [Populus trichocarpa]	Oryza sativa (indica cultivar-group) cDNA clone:OSIGCFA242F02, full insert sequence	Glycine-rich RNA-binding protein 2 OS=Sorghum bicolor GN=GRP2 PE=2 SV=1	gi|116637488|emb|CT834820.1|	291	3e-75	Oryza sativa (indica cultivar-group) cDNA clone:OSIGCFA242F02, full insert sequence	sp|Q99070|GRP2_SORBI	71.6	3e-12	Glycine-rich RNA-binding protein 2 OS=Sorghum bicolor GN=GRP2 PE=2 SV=1	GO:0000956//nuclear-transcribed mRNA catabolic process	-	GO:0005737//cytoplasm;GO:0005834//heterotrimeric G-protein complex;GO:0080008//Cul4-RING ubiquitin ligase complex
gi|532736422|gb|GAHT01080944.1|	Primary Metabolism	Unigene34525_All	0.5997	0.073	0.1218	0	gi|532962212|gb|GAHU01104369.1|	1.4967	0.0252	0.0168	5.33e-07	gi|296088294|emb|CBI36739.3|	296.2	5e-79	unnamed protein product [Vitis vinifera]	PREDICTED: Vitis vinifera branched-chain-amino-acid aminotransferase-like protein 2 (LOC100264940), mRNA	--	gi|359487775|ref|XM_002284879.2|	105	9e-20	PREDICTED: Vitis vinifera branched-chain-amino-acid aminotransferase-like protein 2 (LOC100264940), mRNA	--	--	--	--	-	-	GO:0005829//cytosol
gi|532797324|gb|GAHT01022278.1|	Intracellular traffic	CL16945.Contig3_All	0.2566	0.0261	0.1015	0.999982	gi|533091787|gb|GAHU01017179.1|	0.3927	0.0426	0.1084	5.85e-07	gi|192913016|gb|ACF06616.1|	496.5	4e-139	Toc34-2 protein [Elaeis guineensis]	Vitis vinifera clone SS0ACG14YG07	Translocase of chloroplast 34, chloroplastic OS=Arabidopsis thaliana GN=TOC34 PE=1 SV=2	gi|349718276|emb|FQ381281.1|	115	1e-22	Vitis vinifera clone SS0ACG14YG07	sp|Q38906|TOC34_ARATH	421	5e-118	Translocase of chloroplast 34, chloroplastic OS=Arabidopsis thaliana GN=TOC34 PE=1 SV=2	GO:0045036//protein targeting to chloroplast;GO:0019750//chloroplast localization;GO:0006184//GTP catabolic process;GO:0006606//protein import into nucleus;GO:0006626//protein targeting to mitochondrion	GO:0005525//GTP binding;GO:0015450//P-P-bond-hydrolysis-driven protein transmembrane transporter activity;GO:0042803//protein homodimerization activity;GO:0003924//GTPase activity	GO:0009707//chloroplast outer membrane
gi|532800717|gb|GAHT01018885.1|	Energy	Unigene17707_All	0.2321	0.0051	0.0219	0.999999	gi|533072912|gb|GAHU01036054.1|	0.6128	0.0202	0.0329	6.95e-07	gi|225444667|ref|XP_002277280.1|	440.7	1e-122	PREDICTED: chlorophyll a-b binding protein, chloroplastic [Vitis vinifera] >gi|297738533|emb|CBI27778.3| unnamed protein product [Vitis vinifera]	PREDICTED: Glycine max chlorophyll a-b binding protein, chloroplastic-like (LOC100812066), mRNA	Chlorophyll a-b binding protein, chloroplastic OS=Petunia hybrida PE=2 SV=1	gi|356556397|ref|XM_003546465.1|	200	2e-48	PREDICTED: Glycine max chlorophyll a-b binding protein, chloroplastic-like (LOC100812066), mRNA	sp|P13869|CB12_PETHY	316	9e-87	Chlorophyll a-b binding protein, chloroplastic OS=Petunia hybrida PE=2 SV=1	GO:0010155//regulation of proton transport;GO:0006098//pentose-phosphate shunt;GO:0010218//response to far red light;GO:0009744//response to sucrose stimulus;GO:0010114//response to red light;GO:0030003//cellular cation homeostasis;GO:0019288//isopentenyl diphosphate biosynthetic process, mevalonate-independent pathway;GO:0009765//photosynthesis, light harvesting;GO:0009637//response to blue ligh…	GO:0016168//chlorophyll binding	GO:0016020//membrane;GO:0009507//chloroplast;GO:0030076//light-harvesting complex
gi|532739286|gb|GAHT01078084.1|	Protein Destination and Storage	CL15640.Contig1_All	0.1893	0.048	0.2536	0.999907	gi|532943790|gb|GAHU01113536.1|	0.5521	0.028	0.0507	8.48e-07	gi|334183114|ref|NP_001185164.1|	347.4	3e-94	biotin/lipoate A/B protein ligase family protein [Arabidopsis thaliana] >gi|332194068|gb|AEE32189.1| biotin/lipoate A/B protein ligase family protein [Arabidopsis thaliana]	Oryza sativa Japonica Group Os12g0596000 (Os12g0596000) mRNA, complete cds	Plastidial lipoyltransferase 2 OS=Arabidopsis thaliana GN=LIP2p PE=2 SV=1	gi|115489393|ref|NM_001073716.1|	115	1e-22	Oryza sativa Japonica Group Os12g0596000 (Os12g0596000) mRNA, complete cds	sp|Q948J9|LIP2P_ARATH	337	1e-92	Plastidial lipoyltransferase 2 OS=Arabidopsis thaliana GN=LIP2p PE=2 SV=1	GO:0019243//methylglyoxal catabolic process to D-lactate;GO:0006464//cellular protein modification process;GO:0009107//lipoate biosynthetic process	GO:0016874//ligase activity;GO:0017118//lipoyltransferase activity;GO:0016415//octanoyltransferase activity	GO:0009507//chloroplast
gi|532814730|gb|GAHT01006194.1|	Unclassified	CL11502.Contig3_All	0	0	0.0605	0.999826	gi|533095035|gb|GAHU01013931.1|	0.4045	0.0365	0.0903	8.96e-07	gi|242077722|ref|XP_002448797.1|	401	1e-110	hypothetical protein SORBIDRAFT_06g033360 [Sorghum bicolor] >gi|241939980|gb|EES13125.1| hypothetical protein SORBIDRAFT_06g033360 [Sorghum bicolor]	Oryza sativa Japonica Group cDNA clone:001-038-G07, full insert sequence	--	gi|32989966|dbj|AK104757.1|	426	1e-116	Oryza sativa Japonica Group cDNA clone:001-038-G07, full insert sequence	--	--	--	--	GO:0006378//mRNA polyadenylation	GO:0003729//mRNA binding;GO:0016787//hydrolase activity	GO:0005849//mRNA cleavage factor complex;GO:0009536//plastid
gi|532811857|gb|GAHT01009067.1|	Protein Synthesis	CL2222.Contig2_All	0.0766	0.0076	0.0995	0.999993	gi|532986124|gb|GAHU01092068.1|	0.5741	0.4696	0.8179	1.078e-06	gi|192911946|gb|ACF06581.1|	221.1	2e-56	translational initiation factor eIF1 [Elaeis guineensis]	Zea mays LOC100286322 (TIDP3683), mRNA >gi|224032652|gb|BT068505.1| Zea mays full-length cDNA clone ZM_BFb0276K21 mRNA, complete cds	Protein translation factor SUI1 homolog OS=Zea mays GN=TIF PE=3 SV=1	gi|226504393|ref|NM_001159209.1|	295	5e-77	Zea mays LOC100286322 (TIDP3683), mRNA >gi|224032652|gb|BT068505.1| Zea mays full-length cDNA clone ZM_BFb0276K21 mRNA, complete cds	sp|P56330|SUI1_MAIZE	214	7e-56	Protein translation factor SUI1 homolog OS=Zea mays GN=TIF PE=3 SV=1	GO:0006413//translational initiation;GO:0006417//regulation of translation	GO:0003743//translation initiation factor activity	-
gi|532749723|gb|GAHT01067647.1|	Unclassified	CL1840.Contig2_All	0.2684	0.0436	0.1623	0.999979	gi|533087203|gb|GAHU01021763.1|	0.2873	0.0688	0.2393	1.13e-06	gi|222623698|gb|EEE57830.1|	213.8	2e-54	hypothetical protein OsJ_08429 [Oryza sativa Japonica Group]	PREDICTED: Vitis vinifera uncharacterized LOC100265138, transcript variant 1 (LOC100265138), mRNA	--	gi|225437974|ref|XM_002272050.1|	71.9	1e-09	PREDICTED: Vitis vinifera uncharacterized LOC100265138, transcript variant 1 (LOC100265138), mRNA	--	--	--	--	-	-	GO:0005739//mitochondrion;GO:0009507//chloroplast
gi|532798227|gb|GAHT01021375.1|	Energy	CL6921.Contig1_All	0.568	0.0122	0.0215	5.8746e-05	gi|533097186|gb|GAHU01011780.1|	0.5335	0.0168	0.0316	1.3e-06	gi|242065874|ref|XP_002454226.1|	642.9	0	hypothetical protein SORBIDRAFT_04g027090 [Sorghum bicolor] >gi|241934057|gb|EES07202.1| hypothetical protein SORBIDRAFT_04g027090 [Sorghum bicolor]	PREDICTED: Brachypodium distachyon alcohol dehydrogenase-like 6-like (LOC100826134), mRNA	Alcohol dehydrogenase-like 6 OS=Arabidopsis thaliana GN=At5g24760 PE=2 SV=2	gi|357136718|ref|XM_003569903.1|	190	3e-45	PREDICTED: Brachypodium distachyon alcohol dehydrogenase-like 6-like (LOC100826134), mRNA	sp|Q8LEB2|ADHL6_ARATH	611	3e-175	Alcohol dehydrogenase-like 6 OS=Arabidopsis thaliana GN=At5g24760 PE=2 SV=2	GO:0009611//response to wounding;GO:0009805//coumarin biosynthetic process;GO:0055114//oxidation-reduction process	GO:0016747//transferase activity, transferring acyl groups other than amino-acyl groups;GO:0016491//oxidoreductase activity;GO:0008270//zinc ion binding;GO:0000166//nucleotide binding	GO:0005737//cytoplasm
gi|532764485|gb|GAHT01053782.1|	Unclassified	Unigene36422_All	0.2162	0.057	0.2634	1	gi|533093744|gb|GAHU01015222.1|	0.3074	0.1097	0.3567	1.711e-06	gi|326501348|dbj|BAJ98905.1|	379	6e-104	predicted protein [Hordeum vulgare subsp. vulgare]	Oryza sativa Japonica Group Os06g0311000 (Os06g0311000) mRNA, complete cds	--	gi|297605683|ref|NM_001064017.2|	101	1e-18	Oryza sativa Japonica Group Os06g0311000 (Os06g0311000) mRNA, complete cds	--	--	--	--	-	-	GO:0005739//mitochondrion
gi|532788605|gb|GAHT01029662.1|	Protein Destination and Storage	CL15934.Contig3_All	0.6523	0.0119	0.0182	0.999999	gi|533104304|gb|GAHU01004662.1|	1.0259	0.0526	0.0512	1.884e-06	gi|226500512|ref|NP_001149344.1|	202.2	2e-51	protein binding protein [Zea mays] >gi|195626558|gb|ACG35109.1| protein binding protein [Zea mays]	Phyllostachys edulis cDNA clone: bphylf044g16, full insert sequence	BAG family molecular chaperone regulator 3 OS=Arabidopsis thaliana GN=BAG3 PE=1 SV=1	gi|242389318|emb|FP095381.1|	89.7	2e-15	Phyllostachys edulis cDNA clone: bphylf044g16, full insert sequence	sp|Q9LYP4|BAG3_ARATH	182	9e-47	BAG family molecular chaperone regulator 3 OS=Arabidopsis thaliana GN=BAG3 PE=1 SV=1	GO:0006915//apoptotic process	GO:0051087//chaperone binding	GO:0016023//cytoplasmic membrane-bounded vesicle;GO:0005739//mitochondrion
gi|532798993|gb|GAHT01020609.1|	Unclassified	CL7499.Contig1_All	0.2509	0.008	0.0318	2.533e-06	gi|533077595|gb|GAHU01031371.1|	0.2076	0.007	0.0338	1.888e-06	gi|224141713|ref|XP_002324209.1|	616.7	4e-175	predicted protein [Populus trichocarpa] >gi|222865643|gb|EEF02774.1| predicted protein [Populus trichocarpa]	PREDICTED: Brachypodium distachyon protein cereblon-like (LOC100828195), mRNA	--	gi|357136386|ref|XM_003569738.1|	69.9	9e-09	PREDICTED: Brachypodium distachyon protein cereblon-like (LOC100828195), mRNA	--	--	--	--	GO:0000956//nuclear-transcribed mRNA catabolic process	GO:0008233//peptidase activity	-
gi|532707655|gb|GAHT01109086.1|	Disease/defense	Unigene28383_All	0.4536	0.2347	0.5175	4.936e-06	gi|532840728|gb|GAHU01177187.1|	1.7303	0.0462	0.0267	2.05e-06	gi|357509959|ref|XP_003625268.1|	166.8	2e-40	Metal tolerance protein [Medicago truncatula] >gi|355500283|gb|AES81486.1| Metal tolerance protein [Medicago truncatula]	Brassica rapa clone S50 cation efflux family protein mRNA, complete cds	Metal tolerance protein C2 OS=Arabidopsis thaliana GN=MTPC2 PE=1 SV=1	gi|157849679|gb|EU186334.1|	99.6	4e-18	Brassica rapa clone S50 cation efflux family protein mRNA, complete cds	sp|Q6ICY4|MTPC2_ARATH	137	6e-33	Metal tolerance protein C2 OS=Arabidopsis thaliana GN=MTPC2 PE=1 SV=1	GO:0009624//response to nematode;GO:0055085//transmembrane transport;GO:0006812//cation transport	GO:0008324//cation transmembrane transporter activity	GO:0016021//integral to membrane
gi|532819257|gb|GAHT01001667.1|	Signal Transdcution	Unigene27922_All	1.2875	0.0852	0.0662	0.00246194	gi|533108227|gb|GAHU01000739.1|	1.5165	0.0072	0.0047	2.946e-06	gi|22036132|gb|AAM89506.1|AF289118_1	137.1	1e-30	type 1 ribosome-inactivating protein musarmin 1 [Muscari armeniacum]	Ricinus communis fructokinase, putative, mRNA	Ribosome-inactivating protein charybdin OS=Drimia maritima PE=1 SV=1	gi|255541403|ref|XM_002511720.1|	71.9	3e-09	Ricinus communis fructokinase, putative, mRNA	sp|P84786|RIP_DRIMA	127	3e-29	Ribosome-inactivating protein charybdin OS=Drimia maritima PE=1 SV=1	GO:0006014//D-ribose metabolic process;GO:0016310//phosphorylation;GO:0046686//response to cadmium ion	GO:0004747//ribokinase activity;GO:0008865//fructokinase activity	GO:0005829//cytosol
gi|532786979|gb|GAHT01031288.1|	Primary Metabolism	Unigene12882_All	0.0428	0.0011	0.0269	0.992714	gi|533064168|gb|GAHU01044798.1|	1.1055	0.0133	0.0121	3.772e-06	gi|357119197|ref|XP_003561332.1|	624.4	1e-177	PREDICTED: probable D-2-hydroxyglutarate dehydrogenase, mitochondrial-like [Brachypodium distachyon]	Zea mays clone 1580120 mRNA sequence	Probable D-2-hydroxyglutarate dehydrogenase, mitochondrial OS=Oryza sativa subsp. indica GN=D2HGDH PE=3 SV=1	gi|195614581|gb|EU957003.1|	186	3e-44	Zea mays clone 1580120 mRNA sequence	sp|B8B7X6|D2HDH_ORYSI	613	6e-176	Probable D-2-hydroxyglutarate dehydrogenase, mitochondrial OS=Oryza sativa subsp. indica GN=D2HGDH PE=3 SV=1	GO:0055114//oxidation-reduction process	GO:0050660//flavin adenine dinucleotide binding;GO:0008762//UDP-N-acetylmuramate dehydrogenase activity;GO:0009055//electron carrier activity;GO:0051990//(R)-2-hydroxyglutarate dehydrogenase activity;GO:0004458//D-lactate dehydrogenase (cytochrome) activity	GO:0005739//mitochondrion
gi|532794148|gb|GAHT01024119.1|	Secondary metabolism	CL18683.Contig3_All	0.1805	0.0053	0.0294	0.999998	gi|533072947|gb|GAHU01036019.1|	0.3707	0.0192	0.0519	4.158e-06	gi|154354064|gb|ABS76142.1|	525.4	7e-148	gamma-tocopherol methyltransferase [Elaeis oleifera]	Elaeis guineensis gamma-tocopherol methyltransferase mRNA, complete cds	Probable tocopherol O-methyltransferase, chloroplastic OS=Oryza sativa subsp. japonica GN=VTE4 PE=2 SV=1	gi|358680765|gb|JN848783.1|	337	2e-89	Elaeis guineensis gamma-tocopherol methyltransferase mRNA, complete cds	sp|Q6ZIK0|GTOMC_ORYSJ	484	4e-137	Probable tocopherol O-methyltransferase, chloroplastic OS=Oryza sativa subsp. japonica GN=VTE4 PE=2 SV=1	GO:0010189//vitamin E biosynthetic process;GO:0032259//methylation	GO:0050342//tocopherol O-methyltransferase activity	GO:0009536//plastid
gi|532736556|gb|GAHT01080810.1|	Cell Structure	CL9068.Contig2_All	0.2337	0.0235	0.1005	0.186254	gi|533039369|gb|GAHU01065969.1|	0.4922	0.0157	0.0318	4.413e-06	gi|224086294|ref|XP_002307845.1|	630.9	1e-179	predicted protein [Populus trichocarpa] >gi|222853821|gb|EEE91368.1| predicted protein [Populus trichocarpa]	PREDICTED: Vitis vinifera glucan endo-1,3-beta-glucosidase 5-like (LOC100265360), mRNA	Glucan endo-1,3-beta-glucosidase 6 OS=Arabidopsis thaliana GN=At5g58090 PE=1 SV=2	gi|359497306|ref|XM_002271839.2|	167	4e-38	PREDICTED: Vitis vinifera glucan endo-1,3-beta-glucosidase 5-like (LOC100265360), mRNA	sp|Q93Z08|E136_ARATH	377	7e-105	Glucan endo-1,3-beta-glucosidase 6 OS=Arabidopsis thaliana GN=At5g58090 PE=1 SV=2	GO:0005975//carbohydrate metabolic process	GO:0042973//glucan endo-1,3-beta-D-glucosidase activity;GO:0043169//cation binding	GO:0016023//cytoplasmic membrane-bounded vesicle
gi|532771299|gb|GAHT01046968.1|	Primary Metabolism	CL1299.Contig4_All	0.211	0.0417	0.1974	0.985149	gi|533101307|gb|GAHU01007659.1|	0.3159	0.0713	0.2258	4.552e-06	gi|225434580|ref|XP_002278527.1|	869.8	0	PREDICTED: phosphoinositide phospholipase C 4-like isoform 1 [Vitis vinifera]	Lilium davidii phosphatidylinositol-specific phospholipase C 1 (PLC1) mRNA, partial cds	Phosphoinositide phospholipase C 4 OS=Arabidopsis thaliana GN=PLC4 PE=2 SV=2	gi|58759048|gb|AY735314.1|	385	1e-103	Lilium davidii phosphatidylinositol-specific phospholipase C 1 (PLC1) mRNA, partial cds	sp|Q944C1|PLCD4_ARATH	770	0	Phosphoinositide phospholipase C 4 OS=Arabidopsis thaliana GN=PLC4 PE=2 SV=2	GO:0006629//lipid metabolic process;GO:0035556//intracellular signal transduction	GO:0004871//signal transducer activity;GO:0004435//phosphatidylinositol phospholipase C activity;GO:0005509//calcium ion binding	GO:0005886//plasma membrane;GO:0005739//mitochondrion
gi|532813665|gb|GAHT01007259.1|	Unclassified	CL7541.Contig1_All	0.6945	0.09	0.1296	0.00156071	gi|533099634|gb|GAHU01009332.1|	0.6718	0.0085	0.0127	4.559e-06	gi|115447045|ref|NP_001047302.1|	232.6	1e-59	Os02g0593700 [Oryza sativa Japonica Group] >gi|113536833|dbj|BAF09216.1| Os02g0593700 [Oryza sativa Japonica Group]	--	--	--	--	--	--	--	--	--	--	GO:0051258//protein polymerization	GO:0043130//ubiquitin binding	GO:0005773//vacuole
gi|532797616|gb|GAHT01021986.1|	Protein Destination and Storage	CL7257.Contig1_All	0.4797	0.0108	0.0225	2.616e-06	gi|533080608|gb|GAHU01028358.1|	0.78	0.0052	0.0067	6.072e-06	gi|225456155|ref|XP_002282402.1|	815.5	0	PREDICTED: translocon at the outer membrane of chloroplasts 64 [Vitis vinifera] >gi|297734325|emb|CBI15572.3| unnamed protein product [Vitis vinifera]	PREDICTED: Vitis vinifera translocon at the outer membrane of chloroplasts 64-like (LOC100244007), mRNA	Outer envelope protein 64, chloroplastic OS=Arabidopsis thaliana GN=OEP64 PE=1 SV=1	gi|359491027|ref|XM_002282366.2|	127	5e-26	PREDICTED: Vitis vinifera translocon at the outer membrane of chloroplasts 64-like (LOC100244007), mRNA	sp|Q9LVH5|OE64C_ARATH	756	0	Outer envelope protein 64, chloroplastic OS=Arabidopsis thaliana GN=OEP64 PE=1 SV=1	GO:0009165//nucleotide biosynthetic process	GO:0016884//carbon-nitrogen ligase activity, with glutamine as amido-N-donor;GO:0004040//amidase activity	GO:0031359//integral to chloroplast outer membrane
gi|532751004|gb|GAHT01066366.1|	Unclassified	Unigene582_All	0.5899	0.0077	0.0131	1	gi|533042512|gb|GAHU01064468.1|	0.4432	0.0275	0.0621	7.684e-06	gi|225459983|ref|XP_002267634.1|	330.9	1e-89	PREDICTED: uncharacterized protein LOC100251767 [Vitis vinifera] >gi|297734770|emb|CBI17004.3| unnamed protein product [Vitis vinifera]	PREDICTED: Vitis vinifera uncharacterized LOC100251767 (LOC100251767), mRNA	--	gi|225459982|ref|XM_002267598.1|	67.9	1e-08	PREDICTED: Vitis vinifera uncharacterized LOC100251767 (LOC100251767), mRNA	--	--	--	--	GO:0006071//glycerol metabolic process;GO:0006629//lipid metabolic process	GO:0008889//glycerophosphodiester phosphodiesterase activity	GO:0005886//plasma membrane
gi|532789292|gb|GAHT01028975.1|	Signal Transdcution	CL7813.Contig1_All	0.4255	0.0144	0.0339	0.609061	gi|533054886|gb|GAHU01053466.1|	0.4859	0.019	0.0392	9.097e-06	gi|224145191|ref|XP_002325559.1|	607.4	2e-172	predicted protein [Populus trichocarpa] >gi|222862434|gb|EEE99940.1| predicted protein [Populus trichocarpa]	--	Leucine-rich repeat receptor-like tyrosine-protein kinase At2g41820 OS=Arabidopsis thaliana GN=At2g41820 PE=1 SV=1	--	--	--	--	sp|O22938|Y2182_ARATH	298	9e-81	Leucine-rich repeat receptor-like tyrosine-protein kinase At2g41820 OS=Arabidopsis thaliana GN=At2g41820 PE=1 SV=1	GO:0031348//negative regulation of defense response;GO:0009627//systemic acquired resistance;GO:0006499//N-terminal protein myristoylation;GO:0009863//salicylic acid mediated signaling pathway;GO:0009697//salicylic acid biosynthetic process	GO:0004672//protein kinase activity	GO:0016020//membrane
gi|532814222|gb|GAHT01006702.1|	Signal Transdcution	Unigene17593_All	0.1089	0.002	0.0183	0.999992	gi|533094416|gb|GAHU01014550.1|	0.1267	0.0034	0.0271	1.0016e-05	gi|356534764|ref|XP_003535922.1|	2411.3	0	PREDICTED: magnesium-chelatase subunit H-like [Glycine max]	Zea mays uncharacterized LOC100382191 (LOC100382191), mRNA >gi|223948148|gb|BT063461.1| Zea mays full-length cDNA clone ZM_BFc0066A09 mRNA, complete cds	Magnesium-chelatase subunit ChlH, chloroplastic OS=Oryza sativa subsp. indica GN=CHLH PE=3 SV=1	gi|293336905|ref|NM_001174950.1|	747	0	Zea mays uncharacterized LOC100382191 (LOC100382191), mRNA >gi|223948148|gb|BT063461.1| Zea mays full-length cDNA clone ZM_BFc0066A09 mRNA, complete cds	sp|B8ANF1|CHLH_ORYSI	2359	0	Magnesium-chelatase subunit ChlH, chloroplastic OS=Oryza sativa subsp. indica GN=CHLH PE=3 SV=1	GO:0019684//photosynthesis, light reaction;GO:0015995//chlorophyll biosynthetic process	GO:0016851//magnesium chelatase activity;GO:0051116//cobaltochelatase activity;GO:0000166//nucleotide binding	GO:0005739//mitochondrion;GO:0010007//magnesium chelatase complex;GO:0009706//chloroplast inner membrane
gi|532787072|gb|GAHT01031195.1|	Energy	CL145.Contig5_All	0.1802	0.0343	0.1904	0.135695	gi|533009776|gb|GAHU01080263.1|	0.3069	0.0632	0.206	1.176e-05	gi|225462352|ref|XP_002265957.1|	713.4	0	PREDICTED: CTP synthase [Vitis vinifera] >gi|297736081|emb|CBI24119.3| unnamed protein product [Vitis vinifera]	PREDICTED: Vitis vinifera CTP synthase-like (LOC100248481), mRNA	--	gi|225462351|ref|XM_002265921.1|	391	1e-105	PREDICTED: Vitis vinifera CTP synthase-like (LOC100248481), mRNA	--	--	--	--	GO:0006541//glutamine metabolic process;GO:0000478//endonucleolytic cleavage involved in rRNA processing;GO:0006221//pyrimidine nucleotide biosynthetic process;GO:0046686//response to cadmium ion;GO:0009793//embryo development ending in seed dormancy	GO:0003883//CTP synthase activity	GO:0005829//cytosol
gi|532713301|gb|GAHT01103440.1|	Unclassified	Unigene3519_All	1.5038	0.0944	0.0628	0.278541	gi|532834127|gb|GAHU01183788.1|	1.985	0.1902	0.0958	1.2775e-05	gi|357168362|ref|XP_003581610.1|	104.4	4e-22	PREDICTED: uncharacterized protein LOC100840703 [Brachypodium distachyon]	--	--	--	--	--	--	--	--	--	--	GO:0044238//primary metabolic process;GO:0043170	GO:0017111//nucleoside-triphosphatase activity;GO:0070011;GO:0003676//nucleic acid binding	-
gi|532800538|gb|GAHT01019064.1|	Transporter	CL3037.Contig1_All	0.3713	0.0201	0.0541	0.261283	gi|533068904|gb|GAHU01040062.1|	0.3941	0.066	0.1675	1.4971e-05	gi|225442541|ref|XP_002284183.1|	706.4	0	PREDICTED: VHS domain-containing protein At3g16270 [Vitis vinifera] >gi|297743233|emb|CBI36100.3| unnamed protein product [Vitis vinifera]	PREDICTED: Vitis vinifera VHS domain-containing protein At3g16270-like (LOC100246260), mRNA	VHS domain-containing protein At3g16270 OS=Arabidopsis thaliana GN=At3g16270 PE=1 SV=1	gi|225442540|ref|XM_002284147.1|	121	3e-24	PREDICTED: Vitis vinifera VHS domain-containing protein At3g16270-like (LOC100246260), mRNA	sp|Q9C5H4|Y3627_ARATH	579	2e-165	VHS domain-containing protein At3g16270 OS=Arabidopsis thaliana GN=At3g16270 PE=1 SV=1	GO:0006623//protein targeting to vacuole;GO:0048193//Golgi vesicle transport;GO:0000902//cell morphogenesis;GO:0016049//cell growth	-	GO:0005622//intracellular;GO:0016020//membrane
gi|532743169|gb|GAHT01074201.1|	Disease/defense	CL14130.Contig1_All	0.5236	0.0228	0.0435	0.342776	gi|532934811|gb|GAHU01119665.1|	0.8258	0.0681	0.0825	1.6687e-05	gi|225449965|ref|XP_002271203.1|	472.6	8e-132	PREDICTED: putative disease resistance protein RGA4-like [Vitis vinifera]	Sorghum bicolor hypothetical protein, mRNA	Disease resistance protein RGA2 OS=Solanum bulbocastanum GN=RGA2 PE=1 SV=1	gi|242085561|ref|XM_002443161.1|	65.9	1e-07	Sorghum bicolor hypothetical protein, mRNA	sp|Q7XBQ9|RGA2_SOLBU	410	2e-114	Disease resistance protein RGA2 OS=Solanum bulbocastanum GN=RGA2 PE=1 SV=1	-	GO:0016787//hydrolase activity;GO:0000166//nucleotide binding	-
gi|532746694|gb|GAHT01070676.1|	Disease/defense	Unigene374_All	0.3613	0.0929	0.2571	0.232917	gi|532941448|gb|GAHU01114859.1|	1.0994	0.0876	0.0797	1.7394e-05	gi|193795177|gb|ACF21695.1|	208	8e-53	NBS-type resistance protein RGC5 [Musa acuminata subsp. malaccensis]	Sorghum bicolor hypothetical protein, mRNA	Disease resistance protein RGA2 OS=Solanum bulbocastanum GN=RGA2 PE=1 SV=1	gi|242079816|ref|XM_002444632.1|	63.9	2e-07	Sorghum bicolor hypothetical protein, mRNA	sp|Q7XBQ9|RGA2_SOLBU	163	9e-41	Disease resistance protein RGA2 OS=Solanum bulbocastanum GN=RGA2 PE=1 SV=1	-	-	-
gi|532787876|gb|GAHT01030391.1|	Signal Transdcution	CL11617.Contig2_All	0.1646	0.0146	0.089	0.0553448	gi|533051623|gb|GAHU01056069.1|	0.1431	0.0311	0.217	2.4783e-05	gi|298204417|emb|CBI16897.3|	997.3	0	unnamed protein product [Vitis vinifera]	Zea mays uncharacterized LOC100280233 (LOC100280233), mRNA >gi|219888126|gb|BT055831.1| Zea mays full-length cDNA clone ZM_BFb0223G11 mRNA, complete cds	Protein NSP-INTERACTING KINASE 1 OS=Arabidopsis thaliana GN=NIK1 PE=1 SV=1	gi|226530143|ref|NM_001153162.1|	375	1e-100	Zea mays uncharacterized LOC100280233 (LOC100280233), mRNA >gi|219888126|gb|BT055831.1| Zea mays full-length cDNA clone ZM_BFb0223G11 mRNA, complete cds	sp|Q9LFS4|NIK1_ARATH	924	0	Protein NSP-INTERACTING KINASE 1 OS=Arabidopsis thaliana GN=NIK1 PE=1 SV=1	GO:0051607//defense response to virus;GO:0006468//protein phosphorylation;GO:0055114//oxidation-reduction process	GO:0005524//ATP binding;GO:0032440//2-alkenal reductase [NAD(P)] activity;GO:0004674//protein serine/threonine kinase activity	GO:0005886//plasma membrane;GO:0016021//integral to membrane
gi|532816961|gb|GAHT01003963.1|	Primary Metabolism	Unigene21947_All	0.8112	0.0084	0.0104	0.0398745	gi|532957246|gb|GAHU01106881.1|	1.0803	0.0533	0.0493	2.4823e-05	gi|386688284|gb|AFJ21572.1|	161.4	3e-39	fructan:fructan 6G-fructosyltransferase [Agave tequilana]	Agave tequilana fructan:fructan 6G-fructosyltransferase (FFT1) mRNA, complete cds	Bifunctional 6(G)-fructosyltransferase/2,1-fructan:2,1-fructan 1-fructosyltransferase OS=Allium cepa PE=1 SV=1	gi|386688283|gb|JN790055.1|	438	1e-120	Agave tequilana fructan:fructan 6G-fructosyltransferase (FFT1) mRNA, complete cds	sp|P92916|GFT_ALLCE	129	5e-31	Bifunctional 6(G)-fructosyltransferase/2,1-fructan:2,1-fructan 1-fructosyltransferase OS=Allium cepa PE=1 SV=1	GO:0005975//carbohydrate metabolic process	GO:0050306;GO:0004575//sucrose alpha-glucosidase activity;GO:0051669	GO:0000325//plant-type vacuole;GO:0009505//plant-type cell wall
gi|532788190|gb|GAHT01030077.1|	Protein Synthesis	CL12071.Contig1_All	0.1693	0.0035	0.0205	1	gi|533079494|gb|GAHU01029472.1|	0.6218	0.044	0.0708	2.5447e-05	gi|359475326|ref|XP_003631656.1|	221.1	7e-57	PREDICTED: 50S ribosomal protein L27-like [Vitis vinifera]	Solanum lycopersicum cDNA, clone: LEFL1059AF03, HTC in leaf	50S ribosomal protein L27, chloroplastic OS=Nicotiana tabacum GN=RPL27 PE=1 SV=1	gi|225318580|dbj|AK323539.1|	157	1e-35	Solanum lycopersicum cDNA, clone: LEFL1059AF03, HTC in leaf	sp|P30155|RK27_TOBAC	95.9	1e-20	50S ribosomal protein L27, chloroplastic OS=Nicotiana tabacum GN=RPL27 PE=1 SV=1	GO:0006412//translation	GO:0003735//structural constituent of ribosome	GO:0005840//ribosome
gi|532783418|gb|GAHT01034849.1|	Unclassified	CL4685.Contig2_All	0.262	0.039	0.1489	0.00835655	gi|533063518|gb|GAHU01045448.1|	0.3468	0.0197	0.0568	2.562e-05	gi|225457130|ref|XP_002280322.1|	397.1	3e-109	PREDICTED: uncharacterized protein LOC100255354 [Vitis vinifera]	PREDICTED: Vitis vinifera uncharacterized LOC100255354 (LOC100255354), mRNA	--	gi|225457129|ref|XM_002280286.1|	107	3e-20	PREDICTED: Vitis vinifera uncharacterized LOC100255354 (LOC100255354), mRNA	--	--	--	--	-	-	-
gi|532820150|gb|GAHT01000774.1|	Disease/defense	CL20353.Contig2_All	0.2441	0.0057	0.0235	1.205e-05	gi|533075352|gb|GAHU01033614.1|	0.3504	0.0079	0.0224	2.7187e-05	gi|357163742|ref|XP_003579831.1|	797.3	0	PREDICTED: ferric/cupric reductase transmembrane component 7-like [Brachypodium distachyon]	PREDICTED: Vitis vinifera ferric reduction oxidase 7, chloroplastic-like (LOC100263818), mRNA	Ferric reduction oxidase 7, chloroplastic OS=Arabidopsis thaliana GN=FRO7 PE=2 SV=1	gi|359486140|ref|XM_002266687.2|	161	3e-36	PREDICTED: Vitis vinifera ferric reduction oxidase 7, chloroplastic-like (LOC100263818), mRNA	sp|Q3KTM0|FRO7_ARATH	706	0	Ferric reduction oxidase 7, chloroplastic OS=Arabidopsis thaliana GN=FRO7 PE=2 SV=1	GO:0009767//photosynthetic electron transport chain;GO:0009416//response to light stimulus	GO:0000293//ferric-chelate reductase activity;GO:0005506//iron ion binding	GO:0005886//plasma membrane;GO:0016021//integral to membrane;GO:0009507//chloroplast
gi|532761050|gb|GAHT01056867.1|	Energy	CL498.Contig3_All	0.4381	0.1139	0.2599	0.187533	gi|533041733|gb|GAHU01064801.1|	1.0579	0.0258	0.0243	3.0371e-05	gi|326492852|dbj|BAJ90282.1|	156.8	2e-37	predicted protein [Hordeum vulgare subsp. vulgare] >gi|326515470|dbj|BAK03648.1| predicted protein [Hordeum vulgare subsp. vulgare] >gi|326516800|dbj|BAJ96392.1| predicted protein [Hordeum vulgare subsp. vulgare] >gi|326529207|dbj|BAK00997.1| predicted protein [Hordeum vulgare subsp. vulgare] >gi|326533648|dbj|BAK05355.1| predicted protein [Hordeum vulgare subsp. vulgare]	Linum usitatissimum clone LU0014F04 mRNA sequence	NADH dehydrogenase [ubiquinone] 1 alpha subcomplex subunit 2 OS=Arabidopsis thaliana GN=At5g47890 PE=2 SV=1	gi|192336371|gb|EU829984.1|	71.9	8e-10	Linum usitatissimum clone LU0014F04 mRNA sequence	sp|Q9FIJ2|NDUA2_ARATH	145	3e-35	NADH dehydrogenase [ubiquinone] 1 alpha subcomplex subunit 2 OS=Arabidopsis thaliana GN=At5g47890 PE=2 SV=1	GO:0009853//photorespiration;GO:0055114//oxidation-reduction process	GO:0016655//oxidoreductase activity, acting on NADH or NADPH, quinone or similar compound as acceptor;GO:0003954//NADH dehydrogenase activity	GO:0005747//mitochondrial respiratory chain complex I;GO:0009507//chloroplast
gi|532814685|gb|GAHT01006239.1|	Secondary metabolism	Unigene6064_All	0.3747	0.0084	0.0224	0.999998	gi|533090156|gb|GAHU01018810.1|	0.6103	0.0204	0.0335	3.1139e-05	gi|378749114|gb|AFC37244.1|	468	1e-130	chalcone synthase 3 [Camellia chekiangoleosa]	Anthurium andraeanum chalcone synthase (CHS) gene, complete cds	Chalcone synthase 3 OS=Camellia sinensis GN=CHS3 PE=2 SV=1	gi|90896562|gb|DQ421809.1|	133	5e-28	Anthurium andraeanum chalcone synthase (CHS) gene, complete cds	sp|P48388|CHS3_CAMSI	467	8e-132	Chalcone synthase 3 OS=Camellia sinensis GN=CHS3 PE=2 SV=1	GO:0008152//metabolic process	GO:0016747//transferase activity, transferring acyl groups other than amino-acyl groups	-
gi|532766374|gb|GAHT01051893.1|	Transcription Factor	CL15992.Contig3_All	0.5484	0.015	0.0273	1	gi|532952595|gb|GAHU01109173.1|	0.5564	0.0429	0.0771	3.6289e-05	gi|356510693|ref|XP_003524070.1|	161.8	1e-38	PREDICTED: ethylene-responsive transcription factor 1A-like [Glycine max]	Arabidopsis thaliana chromosome 4, complete sequence	Ethylene-responsive transcription factor 1A OS=Arabidopsis thaliana GN=ERF1A PE=1 SV=2	gi|332656411|gb|CP002687.1|	123	3e-25	Arabidopsis thaliana chromosome 4, complete sequence	sp|O80337|EF100_ARATH	150	6e-37	Ethylene-responsive transcription factor 1A OS=Arabidopsis thaliana GN=ERF1A PE=1 SV=2	GO:0048518;GO:0051707//response to other organism;GO:0006355//regulation of transcription, DNA-dependent;GO:0009755//hormone-mediated signaling pathway;GO:0002252;GO:0006952//defense response	-	-
gi|532746398|gb|GAHT01070972.1|	Transcription Factor	CL14135.Contig2_All	0.5059	0.0352	0.0695	0.20514	gi|532848370|gb|GAHU01169545.1|	0.6162	0.0288	0.0468	3.8107e-05	gi|288558588|dbj|BAI68347.1|	282	7e-75	hypothetical protein [Asparagus asparagoides]	Lilium longiflorum YABBY transcription factor (YAB1) mRNA, complete cds	Protein DROOPING LEAF OS=Oryza sativa subsp. japonica GN=DL PE=1 SV=1	gi|145105280|gb|EF363135.1|	89.7	4e-15	Lilium longiflorum YABBY transcription factor (YAB1) mRNA, complete cds	sp|Q76EJ0|YABDL_ORYSJ	236	9e-63	Protein DROOPING LEAF OS=Oryza sativa subsp. japonica GN=DL PE=1 SV=1	GO:0048440//carpel development;GO:0030154//cell differentiation;GO:0048366//leaf development;GO:0010022//meristem determinacy	-	-
gi|532782056|gb|GAHT01036211.1|	Signal Transdcution	CL7564.Contig1_All	0.1561	0.0324	0.2076	1	gi|533083564|gb|GAHU01025402.1|	0.352	0.0769	0.2185	4.0371e-05	gi|115483000|ref|NP_001065093.1|	733.8	0	Os10g0521700 [Oryza sativa Japonica Group] >gi|113639702|dbj|BAF27007.1| Os10g0521700 [Oryza sativa Japonica Group]	Vitis vinifera clone SS0AAG1YM05	Shaggy-related protein kinase theta OS=Arabidopsis thaliana GN=ASK8 PE=2 SV=3	gi|349705836|emb|FQ384375.1|	432	1e-118	Vitis vinifera clone SS0AAG1YM05	sp|Q96287|KSG8_ARATH	684	0	Shaggy-related protein kinase theta OS=Arabidopsis thaliana GN=ASK8 PE=2 SV=3	GO:0046777//protein autophosphorylation;GO:0009741//response to brassinosteroid stimulus	GO:0050321//tau-protein kinase activity;GO:0004713//protein tyrosine kinase activity;GO:0005524//ATP binding;GO:0004674//protein serine/threonine kinase activity	GO:0005634//nucleus;GO:0005829//cytosol
gi|532768797|gb|GAHT01049470.1|	Disease/defense	CL8398.Contig2_All	0.5958	0.084	0.1409	8.7513e-05	gi|533058309|gb|GAHU01050562.1|	0.8083	0.0585	0.0724	4.2182e-05	gi|225444855|ref|XP_002279295.1|	433.7	9e-120	PREDICTED: disease resistance protein RPS2 [Vitis vinifera]	PREDICTED: Glycine max probable serine/threonine-protein kinase At1g18390-like (LOC100816739), mRNA	Disease resistance protein RPS2 OS=Arabidopsis thaliana GN=RPS2 PE=1 SV=1	gi|356501937|ref|XM_003519732.1|	63.9	1e-06	PREDICTED: Glycine max probable serine/threonine-protein kinase At1g18390-like (LOC100816739), mRNA	sp|Q42484|RPS2_ARATH	359	7e-99	Disease resistance protein RPS2 OS=Arabidopsis thaliana GN=RPS2 PE=1 SV=1	-	-	-
gi|532761114|gb|GAHT01056809.1|	Cell growth/division	CL2599.Contig5_All	0.4899	0.1823	0.3722	0	gi|533045211|gb|GAHU01062355.1|	0.9328	0.0243	0.026	4.3267e-05	gi|125539706|gb|EAY86101.1|	173.7	7e-42	hypothetical protein OsI_07471 [Oryza sativa Indica Group]	PREDICTED: Glycine max uncharacterized protein LOC100798085 (LOC100798085), mRNA	CASP-like protein Sb04g002820 OS=Sorghum bicolor GN=Sb04g002820 PE=3 SV=1	gi|356564598|ref|XM_003550491.1|	83.8	5e-13	PREDICTED: Glycine max uncharacterized protein LOC100798085 (LOC100798085), mRNA	sp|C5XTX2|CSPL8_SORBI	50.8	2e-06	CASP-like protein Sb04g002820 OS=Sorghum bicolor GN=Sb04g002820 PE=3 SV=1	-	-	-
gi|532769873|gb|GAHT01048394.1|	Unclassified	CL19131.Contig2_All	0.5574	0.0153	0.0275	3.057e-06	gi|533033194|gb|GAHU01069076.1|	1.0746	0.0138	0.0129	4.4421e-05	gi|225433920|ref|XP_002268334.1|	320.9	2e-86	PREDICTED: uncharacterized protein LOC100267873 [Vitis vinifera]	Solanum lycopersicum cDNA, clone: LEFL1085BF11, HTC in leaf	--	gi|225320280|dbj|AK324753.1|	93.7	4e-16	Solanum lycopersicum cDNA, clone: LEFL1085BF11, HTC in leaf	--	--	--	--	-	-	GO:0005739//mitochondrion
gi|532777741|gb|GAHT01040526.1|	Cell Structure	CL12877.Contig2_All	0.5808	0.0797	0.1372	0.109679	gi|533037761|gb|GAHU01066805.1|	1.0869	0.0078	0.0072	4.4444e-05	gi|326530384|dbj|BAJ97618.1|	424.1	5e-117	predicted protein [Hordeum vulgare subsp. vulgare]	Solanum lycopersicum cDNA, clone: LEFL1007BD02, HTC in leaf	Dynein light chain 1, axonemal OS=Chlamydomonas reinhardtii GN=LC1 PE=1 SV=1	gi|148538214|dbj|AK246980.1|	77.8	5e-11	Solanum lycopersicum cDNA, clone: LEFL1007BD02, HTC in leaf	sp|Q9XHH2|DNAL1_CHLRE	59.7	9e-09	Dynein light chain 1, axonemal OS=Chlamydomonas reinhardtii GN=LC1 PE=1 SV=1	-	-	-
gi|532699006|gb|GAHT01117735.1|	Unclassified	Unigene42141_All	0.5961	0.2066	0.3466	0.0167533	gi|532832204|gb|GAHU01185711.1|	0.5985	0.2245	0.375	4.5917e-05	gi|147776056|emb|CAN69911.1|	50.4	8e-06	hypothetical protein VITISV_027081 [Vitis vinifera]	--	--	--	--	--	--	--	--	--	--	-	-	-
gi|532777436|gb|GAHT01040831.1|	Unclassified	CL4820.Contig2_All	0.5105	0.0439	0.0861	0.00814732	gi|533070322|gb|GAHU01038644.1|	0.5676	0.0114	0.0201	4.6735e-05	gi|225432412|ref|XP_002276957.1|	488.4	2e-136	PREDICTED: uncharacterized protein LOC100244334 [Vitis vinifera]	PREDICTED: Brachypodium distachyon uncharacterized LOC100822308 (LOC100822308), mRNA	--	gi|357122810|ref|XM_003563060.1|	61.9	3e-06	PREDICTED: Brachypodium distachyon uncharacterized LOC100822308 (LOC100822308), mRNA	--	--	--	--	-	-	-
gi|532730978|gb|GAHT01085763.1|	Transcription	CL1698.Contig2_All	0.5141	0.0781	0.152	0.999999	gi|533045632|gb|GAHU01061934.1|	0.6807	0.0335	0.0493	4.7253e-05	gi|75251129|sp|Q5N8Z0.1|DRB1_ORYSJ	134.8	1e-30	RecName: Full=Double-stranded RNA-binding protein 1; AltName: Full=dsRNA-binding protein 1	--	Double-stranded RNA-binding protein 1 OS=Oryza sativa subsp. japonica GN=DRB1 PE=2 SV=1	--	--	--	--	sp|Q5N8Z0|DRB1_ORYSJ	134	6e-32	Double-stranded RNA-binding protein 1 OS=Oryza sativa subsp. japonica GN=DRB1 PE=2 SV=1	GO:0070918//production of small RNA involved in gene silencing by RNA;GO:0016441//posttranscriptional gene silencing	GO:0005488//binding	GO:0005622//intracellular
[truncated: 619 more rows]
